# Supplementary material for: Cannabinoid signaling modulation through JZL184 restores key phenotypes of a mouse model for Williams–Beuren syndrome
Source: eLife journal article supplement (doi:10.7554/elife.72560), 2022-09-01
Supplement: fig1-figsupp2-data1 [file Figure 1-figure supplement 2-source data 1.xlsx]

## Sheet: Figure 1-figure supplement 2a
		Figure 1-figure supplement 2a
	Row data
			Discrimination Index
			WT			CD
			-0.03			0.12
			0.43			0.23
			0.12			0.27
			0.33			0.27
			0.26			0.39
			0.42			0.17
		Mean	0.255		Mean	0.241667
		SD	0.180527		SD	0.0934701
		SEM	0.0736998		SEM	0.038159
	Statistics	T-tests
	STATISTICA		Mean WT	Mean CD	t-value	df	p
		DI	0.255	0.241667	0.160657	10	0.875563

## Sheet: Figure 1-figure supplement 2b
		Figure 1-figure supplement 2b
	Row data
			%Freezing
			WT			CD
			59.9767			41.3633
			46.2			41.5267
			57.3267			36.01
			18.63			8.24
			25.7033			29.6167
			18.4767
		Mean	37.7189		Mean	31.3513
		SD	19.1354		SD	13.8078
		SEM	7.81201		SEM	6.17504
	Statistics	T-tests
	STATISTICA
			Mean WT	Mean CD	t-value	df	p
		%Freezing	37.7189	31.3513	0.619469	9	0.550965

## Sheet: Figure 1-figure supplement 2c
		Figure 1-figure supplement 2c
	Row data												Statistics
													GraphPad Prism 7.04
	Primary latency (s)
		WT						CD						Table Analyzed	Primary Latency
		Day 1	Day 2	Day 3	Day 4			Day 1	Day 2	Day 3	Day 4
		39	39.5	18.5	9			25.5	17	23	2			Two-way RM ANOVA	Matching: Stacked
		77.5	3	2	3.5			39	8	47.5	3			Alpha	0.05
		38.5	9.5	4	1			60.5	8	17	24
		47.5	4.5	3	1			51.5	25	4.5	2.5			Source of Variation	% of total variation	P value	P value summary	Significant?
		44.5	6.5	2	35			30.5	30.5	7	17.5			Interaction	2.788	0.337482	ns	No
		20.5	4.5	3	10			25	2.5	82.5	5.5			Days	31.16	1e-06	****	Yes
		15	1	5.5	3			47	10.5	4.5	1			Genotype	0.148	0.58438	ns	No
		80	6.5	1.5	2			42	12	8	13.5			Subjects (matching)	10.56	0.914953	ns	No
		51	9.5	27.5	10			17.5	8.5	1	2
		15	73	9.5	1.5			23.5	4.5	10	9			ANOVA table	SS	DF	MS	F (DFn, DFd)	P value
		8.5	31	7.5	4									Interaction	1022	3	340.8	F (3, 66) = 1,145	P=0,337482
		20.5	40.5	16	2									Days	11425	3	3808	F (3, 66) = 12,8	P=0,000001
		59	7.5	6	14									Genotype	54.26	1	54.26	F (1, 22) = 0,3082	P=0,58438
		15.5	10.5	6	10.5									Subjects (matching)	3873	22	176.1	F (22, 66) = 0,5916	P=0,914953
	Mean	38	17.6429	8	7.60714		Mean	36.2	12.65	20.5	8			Residual	19643	66	297.6
	SD	23.3946	20.7822	7.60314	8.99397		SD	14.0083	8.97543	25.6742	7.88811
	SEM	6.25247	5.55428	2.03202	2.40374		SEM	4.42982	2.83828	8.11891	2.49444			Number of missing values	0
														Within each column, compare rows (simple effects within columns)
														Number of families	2
														Number of comparisons per family	6
														Alpha	0.05
														Newman-Keuls multiple comparisons test	Mean Diff,	Significant?	Summary
														WT
														Row 1 vs. Row 2	20.36	Yes	**
														Row 1 vs. Row 3	30	Yes	****
														Row 1 vs. Row 4	30.39	Yes	****
														Row 2 vs. Row 3	9.643	No	ns
														Row 2 vs. Row 4	10.04	No	ns
														Row 3 vs. Row 4	0.3929	No	ns
														CD
														Row 1 vs. Row 2	23.55	Yes	**
														Row 1 vs. Row 3	15.7	Yes	*
														Row 1 vs. Row 4	28.2	Yes	**
														Row 2 vs. Row 3	-7.85	No	ns
														Row 2 vs. Row 4	4.65	No	ns
														Row 3 vs. Row 4	12.5	No	ns
														Test details	Mean 1	Mean 2	Mean Diff,	SE of diff,	N1	N2	q	DF
														WT
														Row 1 vs. Row 2	38	17.64	20.36	6.521	14	14	4.415	66
														Row 1 vs. Row 3	38	8	30	6.521	14	14	6.507	66
														Row 1 vs. Row 4	38	7.607	30.39	6.521	14	14	6.592	66
														Row 2 vs. Row 3	17.64	8	9.643	6.521	14	14	---	66
														Row 2 vs. Row 4	17.64	7.607	10.04	6.521	14	14	2.177	66
														Row 3 vs. Row 4	8	7.607	0.3929	6.521	14	14	---	66
														CD
														Row 1 vs. Row 2	36.2	12.65	23.55	7.715	10	10	4.317	66
														Row 1 vs. Row 3	36.2	20.5	15.7	7.715	10	10	2.878	66
														Row 1 vs. Row 4	36.2	8	28.2	7.715	10	10	5.169	66
														Row 2 vs. Row 3	12.65	20.5	-7.85	7.715	10	10	---	66
														Row 2 vs. Row 4	12.65	8	4.65	7.715	10	10	---	66
														Row 3 vs. Row 4	20.5	8	12.5	7.715	10	10	2.291	66

## Sheet: Figure 1-figure supplement 2d
		Figure 1-figure supplement 2d
	Row data												Statistics
													GraphPad Prism 7.04
	%Time spend
		WT						CD						Table Analyzed	%Time spend
		-1	Target	1	Opposite			-1	Target	1	Opposite
		16.88	39.52	11.67	31.94			18.96	13.82	26.6	40.62			Two-way RM ANOVA	Matching: Stacked
		16.11	26.73	18.4	38.75			14.65	22.78	34.93	27.64			Alpha	0.05
		16.04	58.12	10.69	15.14			24.03	44.17	13.33	18.47
		17.71	20.77	43.12	18.4			12.78	43.89	16.46	26.88			Source of Variation	% of total variation	P value	P value summary	Significant?
		4.03	55.14	20.97	19.86			16.04	34.03	31.18	18.75			Interaction	0.4455	0.891662	ns	No
		5.83	65.49	13.26	15.42			26.46	43.96	11.25	18.33			Quadrant	49.48	<0,000001	****	Yes
		30.76	38.61	17.85	12.78			13.54	65.07	11.53	9.86			Genotype	2.565e-08	0.41998	ns	No
		19.51	46.67	11.25	22.57			11.6	47.85	28.4	12.15			Subjects (matching)	8.353e-07	>0,999999	ns	No
		11.46	74.86	10.62	3.06			0	67.71	18.19	14.1
		27.36	50.9	10.49	11.25			26.32	42.02	14.79	16.88			ANOVA table	SS	DF	MS	F (DFn, DFd)	P value
		21.39	60.28	8.54	9.79									Interaction	101.3	3	33.77	F (3, 66) = 0,2063	P=0,891662
		17.99	30.77	24.51	26.74									Quadrant	11254	3	3751	F (3, 66) = 22,92	P<0,000001
		25	30.63	24.1	20.28									Genotype	5.833e-06	1	5.833e-06	F (1, 22) = 0,6754	P=0,41998
		14.79	36.11	26.94	22.15									Subjects (matching)	0.00019	22	8.636e-06	F (22, 66) = 5,276e-008	P>0,999999
	Mean	17.49	45.3286	18.0293	19.1521		Mean	16.438	42.53	20.666	20.368			Residual	10803	66	163.7
	SD	7.41441	16.0186	9.45195	9.23151		SD	8.03356	16.5456	8.77703	9.09953
	SEM	1.98159	4.28116	2.52614	2.46722		SEM	2.54043	5.23217	2.77554	2.87752			Number of missing values	0
														Within each column, compare rows (simple effects within columns)
														Number of families	2
														Number of comparisons per family	6
														Alpha	0.05
														Newman-Keuls multiple comparisons test	Mean Diff,	Significant?	Summary
														WT
														-1 vs. Target	-27.84	Yes	****
														-1 vs. 1	-0.5393	No	ns
														-1 vs. Opposite	-1.662	No	ns
														Target vs. 1	27.3	Yes	****
														Target vs. Opposite	26.18	Yes	****
														1 vs. Opposite	-1.123	No	ns
														CD
														-1 vs. Target	-26.09	Yes	***
														-1 vs. 1	-4.228	No	ns
														-1 vs. Opposite	-3.93	No	ns
														Target vs. 1	21.86	Yes	***
														Target vs. Opposite	22.16	Yes	***
														1 vs. Opposite	0.298	No	ns
														Test details	Mean 1	Mean 2	Mean Diff,	SE of diff,	N1	N2	q	DF
														WT
														-1 vs. Target	17.49	45.33	-27.84	4.836	14	14	8.142	66
														-1 vs. 1	17.49	18.03	-0.5393	4.836	14	14	---	66
														-1 vs. Opposite	17.49	19.15	-1.662	4.836	14	14	0.4861	66
														Target vs. 1	45.33	18.03	27.3	4.836	14	14	7.984	66
														Target vs. Opposite	45.33	19.15	26.18	4.836	14	14	7.656	66
														1 vs. Opposite	18.03	19.15	-1.123	4.836	14	14	---	66
														CD
														-1 vs. Target	16.44	42.53	-26.09	5.722	10	10	6.449	66
														-1 vs. 1	16.44	20.67	-4.228	5.722	10	10	1.045	66
														-1 vs. Opposite	16.44	20.37	-3.93	5.722	10	10	---	66
														Target vs. 1	42.53	20.67	21.86	5.722	10	10	5.404	66
														Target vs. Opposite	42.53	20.37	22.16	5.722	10	10	5.478	66
														1 vs. Opposite	20.67	20.37	0.298	5.722	10	10	---	66
