# Supplementary material for: Cannabinoid signaling modulation through JZL184 restores key phenotypes of a mouse model for Williams–Beuren syndrome
Source: eLife journal article supplement (doi:10.7554/elife.72560), 2022-09-01
Supplement: fig2-data1 [file Figure 2-source data 1.xlsx]

## Sheet: Figure 2a
	Figure 2a
	Row data
		[3H]CP55,940 binding
		(fmol/mg t.e.)
			WT							CD
			Basolateral amygdala	Central amygdala	Polymorphic DG	Granular DG				Basolateral amygdala	Central amygdala	Polymorphic DG	Granular DG
			431.106	453.657	436.536	159.036				436.976	421.525	329.552	131.601
			545.478	473.445	560.873	153.843				509.752	708.483	531.009	163.547
			429.488	460.888	645.262	308.926				458.211	563.217	444.393	127.143
			412.269	485.148	609.146	271.225				513.245	408.16	356.229	174.75
			451.254	500.212	660.015	197.675				380.747	478.274	402.777	137.31
			381.774	390.167	679.518	208.164				410.514	386.958	435.368	163.403
			361.144	414.89	593.335	284.23				494.499	660.216	523.247	172.068
			375.353	366.206	411.783	121.662				622.805	833.168	645.273	208.646
			529.095	557.557	607.94	351.866				550.626	781.165	640.14	235.907
			338.465	517.227	646.999	380.212				576.032	762.542	396.294	244.643
			441.195	490.14	688.703	269.45
		Mean	426.965	464.503	594.555	246.026			Mean	495.341	600.371	470.428	175.902
		SD	65.0988	56.2652	92.5163	84.3272			SD	75.613	169.71	110.905	41.5696
		SEM	19.628	16.9646	27.8947	25.4256			SEM	23.9109	53.6671	35.0714	13.1455
	Statistics
	STATISTICA
	T-tests
		Mean WT	Mean CD	t-value	df	p
	Basolateral amygdala	426.965	495.341	-2.22681	19	0.038252
	Central amygdala	464.503	600.371	-2.5132	19	0.0211431
	Polymorphic DG	594.555	470.428	2.79498	19	0.0115493
	Granular DG	246.026	175.902	2.37639	19	0.0281521

## Sheet: Figure 2c
	Figure 2c
	Row data
		Cannabinoid receptor activity
		evoked by WIN55,212-2 (%O.B.)
			WT											CD
			Basolateral amygdala	Central amygdala	Piriform cortex	Visual cortex	Olfactory bulb	CA1 oriens	CA1 radiatum					Basolateral amygdala	Central amygdala	Piriform cortex	Visual cortex	Olfactory bulb	CA1 oriens	CA1 radiatum
			249.414	79.0934	209.58	166.967	694.905	160.317	184.809					405.151	305.95	303.621	$	722.63	237.323	242.65
			162.063	75.0178	285.821	$	$	249.231	$					290.494	127.987	309.148	140.962	$	256.273	310.416
			199.605	103.019	193.961	131.763	739.167	149.03	171.031					231.254	138.316	261.805	108.256	701.197	168.648	261.32
			144.546	194.393	195.258	83.8813	757.75	93.2803	121.276					397.613	171.961	239.086	166.579	727.471	290.185	262.628
			218.871	153.717	183.148	99.7697	469.454	192.143	185.108					385.557	167.689	251.376	130.66	$	166.105	164.548
			375.987	147.797	257.691	73.3089	521.09	135.192	184.573					373.61	65.262	237.271	261.931	749.324	242.536	319.311
			302.364	41.3021	108.398	185.652	550.979	137.772	170.282					328.022	166.147	268.537	221.28	717.843	225.69	234.003
			297.196	67.5922	303.446	129.812	541.19	164.866	250.909					236.666	253.518	280.837	214.216	849.685	400.225	$
			225.203	65.3408	127.979	175.773	505.849	188.453	128.039					327.582	79.3594	163.212	126.667	778.223	176.702	164.989
			159.628	42.9985	144.336	77.4246	701.445	144.321	172.559					241.905	102.812	260.006	188.31	809.872	98.0323	127.072
			148.475	69.3672	173.187	88.7709	569.006	114.691	139.355
		Mean	225.759	94.5125	198.437	121.312	605.084	157.209	170.794				Mean	321.785	157.9	257.49	173.207	757.031	226.172	231.882
		SD	74.7197	49.7028	62.6081	42.8511	106.587	42.099	36.9405				SD	68.5778	74.8974	41.0447	51.6857	51.5417	82.6469	66.837
		SEM	22.5288	14.9859	18.8771	13.5507	33.7059	12.6933	11.6816				SEM	21.6862	23.6846	12.9795	17.2286	18.2227	26.1352	22.279
	Statistics								$ not posible to obtain measure-tissue damage
	STATISTICA		Mean WT	Mean CD	t-value	df	p
		Basolateral amygdala	225.759	321.785	-3.05769	19	0.00647727
		Central amygdala	94.5125	157.9	-2.30615	19	0.0325396
		Piriform cortex	198.437	257.49	-2.52679	19	0.0205448
		Visual cortex	121.312	173.207	-2.39214	17	0.0285769
		Olfactory bulb	605.084	757.031	-3.68595	16	0.00200087
		CA1 oriens	157.209	226.172	-2.44469	19	0.024419
		CA1 radiatum	170.794	231.882	-2.5016	17	0.0228728
