# Supplementary material for: Cannabinoid signaling modulation through JZL184 restores key phenotypes of a mouse model for Williams–Beuren syndrome
Source: eLife journal article supplement (doi:10.7554/elife.72560), 2022-09-01
Supplement: fig3-data1 [file Figure 3-source data 1.xlsx]

## Sheet: Figure 3a
	Figure 3a
	Row data																		Statistics
																			STATISTICA
	Phase I		Exploration Time (s)
																			Phase I
			WT VEH				CD VEH				WT JZL184				CD JZL184					SS	Degr. of	MS	F	p
			E1	E2			E1	E2			E1	E2			E1	E2			Intercept	24141.3	1	24141.3	350.143	0
			16.48	12.58			17.94	17.03			13.03	19.21			13.54	14.29			Genotype	104.988	1	104.988	1.52273	0.225429
			9.12	12.29			$	$			11.74	14.98			17.13	13.04			Treatment	506.463	1	506.463	7.3457	0.0103415
			13.32	13.74			18.58	33.38			5.26	8.5			6.81	11.68			Genotype*Treatment	28.9709	1	28.9709	0.420192	0.521072
			26.68	24.45			24.05	17.47			15.83	13.09			13.81	21.72			Error	2413.14	35	68.9469
			12.64	15.12			18.61	24.38			17.31	21.61			20.18	20.91			R1	32.8904	1	32.8904	2.68714	0.11012
			10.03	12.49			23.8	26.84			10.75	10.39			25.42	21.51			R1*Genotype	6.39361	1	6.39361	0.522357	0.47464
			26.79	28.65			27.32	22.26			26.07	28.48			6.36	10.14			R1*Treatment	3.33687	1	3.33687	0.272622	0.604867
			19.43	17.47			19.06	29.55			$	$			5.88	5.25			R1*Genotype*Treatment	11.5348	1	11.5348	0.942395	0.338324
			24.86	26.28			24.26	21.27			8.05	9.76			20.6	14.54			Error	428.397	35	12.2399
			14.01	16.98			16.74	15.52							28.38	19.53
			22.19	32.33											17.57	18				Genotype	Treatment	R1	{1}	{2}	{3}	{4}	{5}	{6}	{7}	{8}
		Mean	17.7773	19.3073		Mean	21.5525	23.8338		Mean	13.505	15.7525		Mean	15.9709	15.51			1	WT	VEH	E1		0.345426	0.792086	0.767529	0.650896	0.27705	0.637232	0.863884
		SD	6.55713	7.28174		SD	3.75595	5.99771		SD	6.39677	6.89932		SD	7.58296	5.32342			2	WT	VEH	E2	0.345426		0.362175	0.785586	0.529877	0.585968	0.491404	0.853437
		SEM	1.97705	2.19553		SEM	1.32793	2.12051		SEM	2.2616	2.43928		SEM	2.28635	1.60507			3	WT	JZL	E1	0.792086	0.362175		0.349286	0.424216	0.0373568	0.915029	0.494712
																			4	WT	JZL	E2	0.767529	0.785586	0.349286		0.356254	0.401932	0.940625	0.949504
								$ video acquisition failure											5	WBS	VEH	E1	0.650896	0.529877	0.424216	0.356254		0.23651	0.52931	0.393476
																			6	WBS	VEH	E2	0.27705	0.585968	0.0373568	0.401932	0.23651		0.122639	0.436477
																			7	WBS	JZL	E1	0.637232	0.491404	0.915029	0.940625	0.52931	0.122639		0.955396
																			8	WBS	JZL	E2	0.863884	0.853437	0.494712	0.949504	0.393476	0.436477	0.955396
	Phase II		Exploration Time (s)
																			STATISTICA
			WT VEH				CD VEH				WT JZL 184				CD JZL 184				Phase II
			S1	E1/E2			S1	E1/E2			S1	E1/E2			S1	E1/E2				SS	Degr. of	MS	F	p
			31.65	1.6			42.76	9.63			30.99	6.33			36.59	7.16			Intercept	63044.3	1	63044.3	693.352	0
			41.61	4.79			70.51	9.19			23.16	12.21			30.99	12.3			Genotype	2499.86	1	2499.86	27.4932	6.63523e-06
			52.38	7.98			71.53	9.35			21.96	5.61			41.54	15.31			Treatment	2036.31	1	2036.31	22.395	3.21529e-05
			45.07	14.51			62.45	6.67			46.08	19.27			20.88	4.85			Genotype*Treatment	1036.29	1	1036.29	11.3969	0.00174052
			32.51	2.56			80.05	7.94			27.29	9.04			50.23	17.05			Error	3364.29	37	90.9267
			38.7	9.69			76.92	8.25			34.97	7.26			60.13	15.54			R1	25887.4	1	25887.4	426.2	0
			43.77	10.24			103.92	8.94			41.16	11.09			33.18	12.04			R1*Genotype	1817.02	1	1817.02	29.9146	3.28437e-06
			42.8	7.1			87.75	7.48			28.6	9.52			36.64	11.31			R1*Treatment	3243.38	1	3243.38	53.3976	1.10824e-08
			44.38	9.39			69.27	9.12			31.45	9.3			30.7	20.02			R1*Genotype*Treatment	1366.19	1	1366.19	22.4925	3.11552e-05
			25.77	6.27			83.74	13.15							46.79	14.63			Error	2247.38	37	60.7401
			30.76	18.22											18.69	8.94
		Mean	39.0364	8.39545		Mean	74.89	8.972		Mean	31.74	9.95889		Mean	36.9418	12.65				Genotype	Treatment	R1	{1}	{2}	{3}	{4}	{5}	{6}	{7}	{8}
		SD	7.92444	4.89464		SD	16.215	1.73889		SD	7.94023	4.09085		SD	12.2974	4.4728			1	WT	VEH	S1		0.000128443	0.209123	0.000124442	0.000119756	0.000127704	0.623257	0.000149986
		SEM	2.38931	1.47579		SEM	5.12764	0.549884		SEM	2.64674	1.36362		SEM	3.7078	1.3486			2	WT	VEH	E1/2	0.000128443		0.000124725	0.92757	0.000122869	0.892349	0.000127705	0.746624
																			3	WT	JZL	S1	0.209123	0.000124725		0.000125644	0.000167415	0.00015032	0.226282	0.00011939
																			4	WT	JZL	E1/2	0.000124442	0.92757	0.000125644		0.000127704	0.816787	0.000149984	0.528368
																			5	WBS	VEH	S1	0.000119756	0.000122869	0.000167415	0.000127704		0.000128443	0.000125328	0.000124442
																			6	WBS	VEH	E1/2	0.000127704	0.892349	0.00015032	0.816787	0.000128443		0.000124442	0.662276
																			7	WBS	JZL	S1	0.623257	0.000127705	0.226282	0.000149984	0.000125328	0.000124442		0.000125345
																			8	WBS	JZL	E1/2	0.000149986	0.746624	0.00011939	0.528368	0.000124442	0.662276	0.000125345
	Phase III		Exploration Time (s)
			WT VEH				CD VEH				WT JZL 184				CD JZL 184				STATISTICA
			S1	S2			S1	S2			S1	S2			S1	S2			Phase III
			0.75	43.49			33.4	48.6			24.59	13.3			10.55	47.1
			10.55	28.29			17.03	28.41			19.51	59.61			7.43	29.05				SS	Degr. of	MS	F	p
			8.79	19.59			57.92	47.06			8.5	21.83			19.34	30.67			Intercept	59325.3	1	59325.3	404.539	0
			16.81	29.75			43.24	23.64			28.33	47.95			4.72	24.41			Genotype	2415.79	1	2415.79	16.4732	0.000245199
			13.39	29.63			27.2	22.53			10.34	34.12			20.03	38.96			Treatment	54.0119	1	54.0119	0.368307	0.547635
			8.14	23.99			28.34	34.86			8.59	17.16			20.06	63.65			Genotype*Treatment	371.127	1	371.127	2.53072	0.120159
			18.59	31.15			23.69	31.26			21.06	21.09			19.8	61.65			Error	5426.02	37	146.649
			13.88	28.28			42.36	44.06			5.27	24.26			13.28	21.01			R1	4303.58	1	4303.58	47.8248	3.67411e-08
			24.38	31.05			33.45	39.43			28.82	17.22			16.08	69.31			R1*Genotype	20.9384	1	20.9384	0.232685	0.632382
			11.23	24.07			33.96	47.27							22.84	39.37			R1*Treatment	578.004	1	578.004	6.42324	0.0156265
			9.22	19.89											13.74	55.67			R1*Genotype*Treatment	1167.25	1	1167.25	12.9714	0.000923885
		Mean	12.3391	28.1073		Mean	34.059	36.712		Mean	17.2233	28.5044		Mean	15.2609	43.7136			Error	3329.5	37	89.9864
		SD	6.21466	6.57986		SD	11.55	9.97409		SD	9.17163	15.7399		SD	5.84803	16.8626
		SEM	1.87379	1.9839		SEM	3.65242	3.15408		SEM	3.05721	5.24665		SEM	1.76325	5.08427
																				Genotype	Treatment	R1	{1}	{2}	{3}	{4}	{5}	{6}	{7}	{8}
																			1	WT	VEH	S1		0.00335264	0.637595	0.0110803	0.00332138	0.00019501	0.589592	0.000123449
																			2	WT	VEH	S2	0.00335264		0.0272028	0.941499	0.437158	0.389486	0.0256886	0.0455334
																			3	WT	JZL	S1	0.637595	0.0272028		0.0286705	0.0169648	0.00133207	0.716867	0.000134509
																			4	WT	JZL	S2	0.0110803	0.941499	0.0286705		0.253299	0.289336	0.0375724	0.0357894
																			5	WBS	VEH	S1	0.00332138	0.437158	0.0169648	0.253299		0.532076	0.0102312	0.119229
																			6	WBS	VEH	S2	0.00019501	0.389486	0.00133207	0.289336	0.532076		0.000558194	0.200251
																			7	WBS	JZL	S1	0.589592	0.0256886	0.716867	0.0375724	0.0102312	0.000558194		0.000128963
																			8	WBS	JZL	S2	0.000123449	0.0455334	0.000134509	0.0357894	0.119229	0.200251	0.000128963

## Sheet: Figure 3b
	Figure 3b
	Row data
	Discrimination Index
			WT VEH			CD VEH			WT JZL184			CD JZL184
			0.189069			0.00393782			0.303589			0.165401
			0.530864			0.0828729			0.10308			0.211289
			0.325598			0.0288233			0.390201			0.240318
			0.149371			0.105719			0.339246			0.194741
			0.325988			-0.108696			0.0160657			0.181782
			0.195847			-0.124082			0.264296			0.197968
			0.31718			0.284601			0.267045			0.479004
			0.429029			0.073071			0.421484			0.271364
			0.354371			-0.0397675			0.0992028			0.465972
			0.399019			0.0402597			0.593975			0.41078
			0.530105			-0.00196754			-0.0425864			0.421584
						0.153251			0.0535035			0.397349
												0.248879
		Mean	0.340586		Mean	0.041502		Mean	0.234092		Mean	0.298956
		SD	0.128455		SD	0.112194		SD	0.190441		SD	0.117102
		SEM	0.0387305		SEM	0.0323876		SEM	0.0549755		SEM	0.0324782
	Statistics
	STATISTICA		SS	Degr. of	MS	F	p
		Intercept	2.50367	1	2.50367	127.065	1.46549e-14
		Genotype	0.164002	1	0.164002	8.32338	0.00604015
		Treatment	0.0681293	1	0.0681293	3.45768	0.0696533
		Genotype*Treatment	0.39599	1	0.39599	20.0972	5.20452e-05
		Error	0.866966	44	0.0197038
	Newman-Keuls test; variable DI (Spreadsheet7)_x000D_ Probabilities for Post Hoc Tests_x000D_ Error: Between MS = ,01970, df = 44,000
			Genotype	Treatment	{1}	{2}	{3}	{4}
		1	WT	VEH		0.164035	0.000190163	0.472324
		2	WT	JZL184	0.164035		0.00176659	0.264736
		3	CD	VEH	0.000190163	0.00176659		0.000268525
		4	CD	JZL184	0.472324	0.264736	0.000268525

## Sheet: Figure 3c
	Figure 3c
	Row data
			WT VEH			CD VEH			WT JZL184			CD JZL184
			%Time in open arms	Total entries		%Time in open arms	Total entries		%Time in open arms	Total entries		%Time in open arms	Total entries
			3.61	10		0	1		0.32	3		3.2	15
			4.8	18		9.18	21		1.19	9		4.85	9
			2.86	9		5.93	17		1.53	9		0.9	4
			4.21	10		14.21	29		5.49	22		0	0
			4.54	14		3.76	9		1.19	10		4.49	13
			4.29	6		11.79	27		2.44	11
			7.57	26					1.95	9
			0	2					1.14	6
			4.76	20					1.22	4
		Mean	4.07111	12.7778	Mean	7.47833	17.3333	Mean	1.83	9.22222	Mean	2.688	8.2
		SD	1.99338	7.4796	SD	5.27163	10.7641	SD	1.49246	5.51765	SD	2.15673	6.22093
		SEM	0.66446	2.4932	SEM	2.15213	4.39444	SEM	0.497488	1.83922	SEM	0.964517	2.78209
	Statistics
	STATISTICA		%Time in open arms
				SS	Degr. of	MS	F	p
			Intercept	438.39	1	438.39	52.9036	1.27388e-07
			Genotype	30.8923	1	30.8923	3.72799	0.0649235
			Treatment	83.9568	1	83.9568	10.1317	0.00387366
			Genotype*Treatment	11.0352	1	11.0352	1.3317	0.259416
			Error	207.164	25	8.28657
				Genotype	Treatment	{1}	{2}	{3}	{4}
			1	WT	VEH		0.339056	0.038901	0.384522
			2	WT	JZL	0.339056		0.00686625	0.587808
			3	CD	VEH	0.038901	0.00686625		0.0138372
			4	CD	JZL	0.384522	0.587808	0.0138372
			Total entries
				SS	Degr. of	MS	F	p
			Intercept	3836.75	1	3836.75	67.2998	1.48138e-08
			Genotype	21.2	1	21.2	0.371866	0.547492
			Treatment	273.41	1	273.41	4.79584	0.0380731
			Genotype*Treatment	52.831	1	52.831	0.926701	0.344941
			Error	1425.24	25	57.0098
				Genotype	Treatment	{1}	{2}	{3}	{4}
			1	WT	VEH		0.393916	0.276895	0.512683
			2	WT	JZL	0.393916		0.138226	0.805131
			3	CD	VEH	0.276895	0.138226		0.142963
			4	CD	JZL	0.512683	0.805131	0.142963
