# Supplementary material for: Cannabinoid signaling modulation through JZL184 restores key phenotypes of a mouse model for Williams–Beuren syndrome
Source: eLife journal article supplement (doi:10.7554/elife.72560), 2022-09-01
Supplement: fig3-figsupp1-data1 [file Figure 3-figure supplement 1-source data 1.xlsx]

## Sheet: Figure 3-figure supplement 1a
		Figure 3-figure supplement 1a
	Row Data
	Phase I		Exploration Time (s)
			WT VEH				CD VEH				WT JZL184				CD JZL184
			E1	E2			E1	E2			E1	E2			E1	E2
			17.05	16.85			$	$			18.08	24.47			14.51	19.86
			17.15	15.39			12.67	9.94			15.22	15.7			17.2	20.49
			11.53	17.2			21.51	21.16			$	$			17.37	13.24
			21.31	19.99			23.36	18.37			12.96	13.23			21.44	20.92
			$	$			26.5	29.34			11.79	14.14			17.86	18.03
			10.4	9.23			14.37	15.32			21.68	20.32			14.31	14.51
			17.98	20.27							16.91	16.81
			21.3	20.87							15.11	14.63
			16.4	19.8
		Mean	16.64	17.45		Mean	19.682	18.826		Mean	15.9643	17.0429		Mean	17.115	17.8417
		SD	3.97951	3.85185		SD	5.93169	7.20161		SD	3.31095	4.01136		SD	2.60718	3.2519
		SEM	1.40697	1.36184		SEM	2.65273	3.22066		SEM	1.25142	1.51615		SEM	1.06438	1.32758
			$ video acquisition failure
	Statistics
	STATISTICA
	Phase I
		SS	Degr. of	MS	F	p
	Intercept	15568.9	1	15568.9	475.063	2.22045e-16
	Genotype	31.9494	1	31.9494	0.974895	0.334198
	Treatment	16.9227	1	16.9227	0.516374	0.479956
	Genotype*Treatment	4.80153	1	4.80153	0.146512	0.705564
	Error	720.988	22	32.7722
	R1	2.43877	1	2.43877	0.588955	0.450982
	R1*Genotype	3.20866	1	3.20866	0.77488	0.388227
	R1*Treatment	2.70052	1	2.70052	0.652165	0.427985
	R1*Genotype*Treatment	1.36074	1	1.36074	0.328615	0.57229
	Error	91.0986	22	4.14084

## Sheet: Figure 3-figure supplement 1b
		Figure 3-figure supplement 1b
	Row Data
	Phase II		Exploration Time (s)
			WT VEH				CD VEH				WT JZL184				CD JZL184
			S1	E1/E2			S1	E1/E2			S1	E1/E2			S1	E1/E2
			56.74	6.33			69.79	11.17			41.78	13.14			48.28	8.2
			56.54	10.26			69.39	7.29			33.25	11.92			70.39	5.81
			47.09	12.29			60.9	15.61			54.09	8.25			71.28	9.19
			55.27	14.53			78.05	21.21			47.42	17.04			59.69	20.27
			55.82	8.92			93.92	12.71			30.98	10.28			72.18	5.82
			46.12	8.75			35.96	9.95			43.65	9.88			42.05	10.58
			49.22	8.98							43.18	9.35
			54.16	18.58							43.99	11.97
			52.82	7.06
		Mean	52.6422	10.6333		Mean	68.0017	12.99		Mean	42.2925	11.4787		Mean	60.645	9.97833
		SD	4.12919	3.90065		SD	19.2611	4.88989		SD	7.37744	2.75351		SD	12.9669	5.38017
		SEM	1.3764	1.30022		SEM	7.86333	1.99629		SEM	2.60832	0.973512		SEM	5.29372	2.19644
	Statistics
	STATISTICA
	Phase II
		SS	Degr. of	MS	F	p
	Intercept	63376.8	1	63376.8	845.101	0
	Genotype	1049.23	1	1049.23	13.991	0.00096183
	Treatment	346.761	1	346.761	4.62389	0.0413932
	Genotype*Treatment	0.655502	1	0.655502	0.00874081	0.926258
	Error	1874.83	25	74.9932
	R1	27976.9	1	27976.9	393.532	1.11022e-16
	R1*Genotype	947.851	1	947.851	13.3328	0.00120558
	R1*Treatment	212.045	1	212.045	2.98269	0.0964969
	R1*Genotype*Treatment	41.2019	1	41.2019	0.579559	0.453607
	Error	1777.3	25	71.0919
		Genotype	Treatment	R1	{1}	{2}	{3}	{4}	{5}	{6}	{7}	{8}
	1	WT	VEH	S1		0.000129863	0.0343649	0.000165084	0.00754572	0.00012408	0.0957561	0.000141539
	2	WT	VEH	E1/2	0.000129863		0.000165093	0.856423	0.000139399	0.867256	0.000141539	0.888528
	3	WT	JZL	S1	0.0343649	0.000165093		0.00013235	0.000203436	0.000115311	0.00159712	0.000128726
	4	WT	JZL	E1/2	0.000165084	0.856423	0.00013235		0.000141539	0.746478	0.000128716	0.943763
	5	WBS-CD	VEH	S1	0.00754572	0.000139399	0.000203436	0.000141539		0.000129863	0.124077	0.000131928
	6	WBS-CD	VEH	E1/2	0.00012408	0.867256	0.000115311	0.746478	0.000129863		0.000165084	0.914004
	7	WBS-CD	JZL	S1	0.0957561	0.000141539	0.00159712	0.000128716	0.124077	0.000165084		0.000141903
	8	WBS-CD	JZL	E1/2	0.000141539	0.888528	0.000128726	0.943763	0.000131928	0.914004	0.000141903
