# Supplementary material for: Cannabinoid signaling modulation through JZL184 restores key phenotypes of a mouse model for Williams–Beuren syndrome
Source: eLife journal article supplement (doi:10.7554/elife.72560), 2022-09-01
Supplement: fig3-figsupp2-data1 [file Figure 3-figure supplement 2-source data 1.xlsx]

## Sheet: Figure 3-figure supplement 2
	Figure 3-figure supplement 2
	Row Data
	Locomotor activity
	(n of movements)
			WT VEH			CD VEH			WT JZL184			CD JZL184
			761.333			1003.17			1022.67			891
			941.167			923.667			984			842
			878.167			789.5			774.833			965.333
			806.333			899.667			843.167			723.333
			615.667			806			936.167			677.333
			860.667			762.667			1024.33			974.833
			962.167			891.667			647.667			992.333
			876						933.167			808.333
		Mean	837.688		Mean	868.048		Mean	895.75		Mean	859.312
		SD	110.805		SD	85.6671		SD	132.23		SD	118.194
		SEM	39.1754		SEM	32.3791		SEM	46.7505		SEM	41.788
	Statistics
	STATISTICA			SS	Degr. of	MS	F	p
			Intercept	2.31282e+07	1	2.31282e+07	1783.36	0
			Genotype	71.3215	1	71.3215	0.00549942	0.941431
			Treatment	4698.56	1	4698.56	0.362294	0.552256
			Genotype*Treatment	8616.15	1	8616.15	0.664369	0.422154
			Error	350161	27	12968.9
				Genotype	Treatment	{1}	{2}	{3}	{4}
			1	WT	VEH		0.749631	0.860441	0.712058
			2	WT	JZL	0.749631		0.636593	0.80578
			3	CD	VEH	0.860441	0.636593		0.881403
			4	CD	JZL	0.712058	0.80578	0.881403
