# Supplementary material for: Cannabinoid signaling modulation through JZL184 restores key phenotypes of a mouse model for Williams–Beuren syndrome
Source: eLife journal article supplement (doi:10.7554/elife.72560), 2022-09-01
Supplement: fig4-data1 [file Figure 4-source data 1.xlsx]

## Sheet: Figure 4a
	Figure 4a
	Row Data
	CB1 intensity
	(% from control group)
			WT VEH			CD VEH			WT JZL184			CD JZL184
			86.9647			123.255			72.3852			83.4699
			92.2919			107.349			72.4003			87.6477
			96.3855			98.2401			80.6069			73.4402
			116.979			134.286			89.1742			86.6005
			104.007			133.419
			103.372
		Mean	100		Mean	119.31		Mean	78.6416		Mean	82.7896
		SD	10.5651		SD	16.015		SD	8.0186		SD	6.48067
		SEM	4.31318		SEM	7.16211		SEM	4.0093		SEM	3.24034
	Statistics
	STATISTICA
			SS	Degr. of	MS	F	p
		Intercept	167266	1	167266	1318.5	4.44089e-16
		Genotype	634.931	1	634.931	5.00494	0.0408823
		Treatment	3865.32	1	3865.32	30.469	5.88231e-05
		Genotype*Treatment	265.254	1	265.254	2.09091	0.168749
		Error	1902.91	15	126.861
			Genotype	Treatment	{1}	{2}	{3}	{4}
		1	WT	VEH		0.0291346	0.0200713	0.0348944
		2	WT	JZL	0.0291346		0.000494455	0.584254
		3	CD	VEH	0.0200713	0.000494455		0.000640306
		4	CD	JZL	0.0348944	0.584254	0.000640306

## Sheet: Figure 4c
	Figure 4a
	Row Data			Cannabinoid receptor activity
				evoked by WIN55,212-2 (%O.B.)
					WT VEH									WT JZL184									CD VEH									CD JZL184
					Basolateral amygdala	Central amygdala	Piriform cortex	Visual cortex	Olfactory bulb	CA1 oriens	CA1 radiatum			Basolateral amygdala	Central amygdala	Piriform cortex	Visual cortex	Olfactory bulb	CA1 oriens	CA1 radiatum			Basolateral amygdala	Central amygdala	Piriform cortex	Visual cortex	Olfactory bulb	CA1 oriens	CA1 radiatum			Basolateral amygdala	Central amygdala	Piriform cortex	Visual cortex	Olfactory bulb	CA1 oriens	CA1 radiatum
					168.224	110.19	127.233	65.762	349.582	125.746	71.304			137.633	181.18	125.31	55.23	$	0.935	$			130.25	90.802	$	84.756	674.439	78.687	381.971			178.953	112.258	109.115	103.589	553.175	56.642	106.572
					150.785	38.545	73.922	37.246	403.978	127.975	38.963			170.521	74.701	101.297	101.967	91.509	$	8.315			331.276	124.326	137.741	126.402	610.504	106.742	112.563			195.114	168.783	123.588	165.751	488.493	50.884	155.411
					202.436	154.446	182.412	223.717	$	159.22	$			294.332	82.703	59.118	53.662	183.909	3.663	74.914			327.552	116.01	209.625	98.876	426.576	159.171	149.301			187.326	117.426	134.361	160.932	453.064	38.439	109.272
					257.106	90.016	118.669	63.468	$	186.754	109.396			352.685	216.777	86.015	$	140.778	18.538	48.398			299.131	221.008	325.51	207.597	$	102.694	369.231			210.57	125.532	171.277	155.319	431.956	87.728	106.969
					231.133	312.178	$	233.219	$	123.418	127.543			171.663	112.844	40.446	34.741	132.975	10.131	$			277.346	182.319	170.968	$	729.061	$	253.391			308.959	266.297	78.162	102.436	711.957	60.418	206.078
					261.597	304.355	210.929	127.007	234.131	153.707	40.746			132.578	151.044	187.633	77.361	$	49.346	49.941			586.724	$	278.7	151.187	665.924	156.455	161.145
					79.304	70.076	136.571	55.655	447.413	95.955	63.489			50.409	49.227	160.259	42.934	228.607	35.798	11.161
					251.304	144.397	158.725	158.74	554.998	142.733	$			77.206	106.112	132.011	50.797	138.976	$	$
														111.334	$	62.199	66.761	88.534	7.27	55.719
				Mean	200.236	153.025	144.066	120.602	398.02	139.439	75.2402		Mean	166.485	121.823	106.032	60.4316	143.613	17.9544	41.408		Mean	325.38	146.893	224.509	133.764	621.301	120.75	237.934		Mean	216.184	158.059	123.301	137.605	527.729	58.8222	136.86
				SD	63.9883	102.886	44.8343	77.6888	118.662	27.5444	36.2262		SD	98.4419	56.9986	49.3618	21.3265	49.5631	18.1358	26.3027		SD	147.927	53.2852	77.0628	48.549	116.685	35.5055	116.357		SD	53.1545	64.4927	34.1426	31.7965	112.777	18.1751	43.8953
				SEM	22.6233	36.3755	16.9458	27.4671	53.0675	9.73843	14.7893		SEM	32.814	20.152	16.4539	7.54006	18.7331	6.85467	10.738		SEM	60.391	23.8299	34.4635	21.7118	52.1831	15.8785	47.5025		SEM	23.7714	28.842	15.269	14.2198	50.4352	8.12815	19.6306
											$ not posible to obtain measure-tissue damage
	Statistics
	GraphPad Prism 7.04				Table Analyzed	WIN55,212-2 stimulation with JZL184
					Two-way ANOVA	Ordinary
					Alpha	0.05
					Source of Variation	% of total variation	P value	P value summary	Significant?
					Interaction	16.1	<0,000001	****	Yes
					area	51.25	<0,000001	****	Yes
					group	17.71	<0,000001	****	Yes
					ANOVA table	SS (Type III)	DF	MS	F (DFn, DFd)	P value
					Interaction	560232	18	31124	F (18, 148) = 6,174	P<0,000001
					area	1783791	6	297299	F (6, 148) = 58,98	P<0,000001
					group	616400	3	205467	F (3, 148) = 40,76	P<0,000001
					Residual	746081	148	5041
					Number of missing values	76
					Within each row, compare columns (simple effects within rows)
					Number of families	7
					Number of comparisons per family	6
					Alpha	0.05
					Newman-Keuls multiple comparisons test	Mean Diff,	Significant?	Summary
					Basolateral amygdala
					WT VEH vs. WT JZL 184	33.75	No	ns
					WT VEH vs. CD VEH	-125.1	Yes	**
					WT VEH vs. CD JZL 184	-15.95	No	ns
					WT JZL 184 vs. CD VEH	-158.9	Yes	***
					WT JZL 184 vs. CD JZL 184	-49.7	No	ns
					CD VEH vs. CD JZL 184	109.2	Yes	*
					Central amygdala
					WT VEH vs. WT JZL 184	31.2	No	ns
					WT VEH vs. CD VEH	6.132	No	ns
					WT VEH vs. CD JZL 184	-5.034	No	ns
					WT JZL 184 vs. CD VEH	-25.07	No	ns
					WT JZL 184 vs. CD JZL 184	-36.24	No	ns
					CD VEH vs. CD JZL 184	-11.17	No	ns
					Piriform cortex
					WT VEH vs. WT JZL 184	38.03	No	ns
					WT VEH vs. CD VEH	-80.44	No	ns
					WT VEH vs. CD JZL 184	20.77	No	ns
					WT JZL 184 vs. CD VEH	-118.5	Yes	*
					WT JZL 184 vs. CD JZL 184	-17.27	No	ns
					CD VEH vs. CD JZL 184	101.2	No	ns
					Visual cortex
					WT VEH vs. WT JZL 184	60.17	No	ns
					WT VEH vs. CD VEH	-13.16	No	ns
					WT VEH vs. CD JZL 184	-17	No	ns
					WT JZL 184 vs. CD VEH	-73.33	No	ns
					WT JZL 184 vs. CD JZL 184	-77.17	No	ns
					CD VEH vs. CD JZL 184	-3.842	No	ns
					Olfactory bulb
					WT VEH vs. WT JZL 184	254.4	Yes	****
					WT VEH vs. CD VEH	-223.3	Yes	****
					WT VEH vs. CD JZL 184	-129.7	Yes	**
					WT JZL 184 vs. CD VEH	-477.7	Yes	****
					WT JZL 184 vs. CD JZL 184	-384.1	Yes	****
					CD VEH vs. CD JZL 184	93.57	Yes	*
					CA1 oriens
					WT VEH vs. WT JZL 184	121.5	Yes	**
					WT VEH vs. CD VEH	18.69	No	ns
					WT VEH vs. CD JZL 184	80.62	No	ns
					WT JZL 184 vs. CD VEH	-102.8	Yes	*
					WT JZL 184 vs. CD JZL 184	-40.87	No	ns
					CD VEH vs. CD JZL 184	61.93	No	ns
					CA1 radiatum
					WT VEH vs. WT JZL 184	33.83	No	ns
					WT VEH vs. CD VEH	-162.7	Yes	***
					WT VEH vs. CD JZL 184	-61.62	No	ns
					WT JZL 184 vs. CD VEH	-196.5	Yes	****
					WT JZL 184 vs. CD JZL 184	-95.45	No	ns
					CD VEH vs. CD JZL 184	101.1	Yes	*
					Test details	Mean 1	Mean 2	Mean Diff,	SE of diff,	N1	N2	q	DF
					Basolateral amygdala
					WT VEH vs. WT JZL 184	200.2	166.5	33.75	34.5	8	9	---	148
					WT VEH vs. CD VEH	200.2	325.4	-125.1	38.34	8	6	4.615	148
					WT VEH vs. CD JZL 184	200.2	216.2	-15.95	40.48	8	5	---	148
					WT JZL 184 vs. CD VEH	166.5	325.4	-158.9	37.42	9	6	6.005	148
					WT JZL 184 vs. CD JZL 184	166.5	216.2	-49.7	39.6	9	5	1.775	148
					CD VEH vs. CD JZL 184	325.4	216.2	109.2	42.99	6	5	3.592	148
					Central amygdala
					WT VEH vs. WT JZL 184	153	121.8	31.2	35.5	8	8	---	148
					WT VEH vs. CD VEH	153	146.9	6.132	40.48	8	5	---	148
					WT VEH vs. CD JZL 184	153	158.1	-5.034	40.48	8	5	---	148
					WT JZL 184 vs. CD VEH	121.8	146.9	-25.07	40.48	8	5	---	148
					WT JZL 184 vs. CD JZL 184	121.8	158.1	-36.24	40.48	8	5	1.266	148
					CD VEH vs. CD JZL 184	146.9	158.1	-11.17	44.9	5	5	---	148
					Piriform cortex
					WT VEH vs. WT JZL 184	144.1	106	38.03	35.78	7	9	1.503	148
					WT VEH vs. CD VEH	144.1	224.5	-80.44	41.57	7	5	---	148
					WT VEH vs. CD JZL 184	144.1	123.3	20.77	41.57	7	5	---	148
					WT JZL 184 vs. CD VEH	106	224.5	-118.5	39.6	9	5	4.231	148
					WT JZL 184 vs. CD JZL 184	106	123.3	-17.27	39.6	9	5	---	148
					CD VEH vs. CD JZL 184	224.5	123.3	101.2	44.9	5	5	3.187	148
					Visual cortex
					WT VEH vs. WT JZL 184	120.6	60.43	60.17	35.5	8	8	---	148
					WT VEH vs. CD VEH	120.6	133.8	-13.16	40.48	8	5	---	148
					WT VEH vs. CD JZL 184	120.6	137.6	-17	40.48	8	5	---	148
					WT JZL 184 vs. CD VEH	60.43	133.8	-73.33	40.48	8	5	---	148
					WT JZL 184 vs. CD JZL 184	60.43	137.6	-77.17	40.48	8	5	2.696	148
					CD VEH vs. CD JZL 184	133.8	137.6	-3.842	44.9	5	5	---	148
					Olfactory bulb
					WT VEH vs. WT JZL 184	398	143.6	254.4	41.57	5	7	8.654	148
					WT VEH vs. CD VEH	398	621.3	-223.3	44.9	5	5	7.032	148
					WT VEH vs. CD JZL 184	398	527.7	-129.7	44.9	5	5	4.085	148
					WT JZL 184 vs. CD VEH	143.6	621.3	-477.7	41.57	7	5	16.25	148
					WT JZL 184 vs. CD JZL 184	143.6	527.7	-384.1	41.57	7	5	13.07	148
					CD VEH vs. CD JZL 184	621.3	527.7	93.57	44.9	5	5	2.947	148
					CA1 oriens
					WT VEH vs. WT JZL 184	139.4	17.95	121.5	36.75	8	7	4.675	148
					WT VEH vs. CD VEH	139.4	120.7	18.69	40.48	8	5	---	148
					WT VEH vs. CD JZL 184	139.4	58.82	80.62	40.48	8	5	2.817	148
					WT JZL 184 vs. CD VEH	17.95	120.7	-102.8	41.57	7	5	3.497	148
					WT JZL 184 vs. CD JZL 184	17.95	58.82	-40.87	41.57	7	5	1.39	148
					CD VEH vs. CD JZL 184	120.7	58.82	61.93	44.9	5	5	---	148
					CA1 radiatum
					WT VEH vs. WT JZL 184	75.24	41.41	33.83	40.99	6	6	---	148
					WT VEH vs. CD VEH	75.24	237.9	-162.7	40.99	6	6	5.613	148
					WT VEH vs. CD JZL 184	75.24	136.9	-61.62	42.99	6	5	---	148
					WT JZL 184 vs. CD VEH	41.41	237.9	-196.5	40.99	6	6	6.78	148
					WT JZL 184 vs. CD JZL 184	41.41	136.9	-95.45	42.99	6	5	3.14	148
					CD VEH vs. CD JZL 184	237.9	136.9	101.1	42.99	6	5	3.325	148
