# Supplementary material for: Cannabinoid signaling modulation through JZL184 restores key phenotypes of a mouse model for Williams–Beuren syndrome
Source: eLife journal article supplement (doi:10.7554/elife.72560), 2022-09-01
Supplement: fig4-figsupp1-data1 [file Figure 4-figure supplement 1-source data 1.xlsx]

## Sheet: Figure 4-figure supplement 1
	Figure 4-figure supplement 1
	Row Data
	CB1
	(% from control treatment)
				CD VEH			CD JZL184
				88.5701			58.8353
				108.436			71.6134
				137.094			105.561
				88.7263			63.9239
				95.3535			73.4504
				108.366			60.1053
				73.4531			30.8294
			Mean	100		Mean	66.3312
			SD	20.4174		SD	22.281
			SEM	7.71706		SEM	8.42144
	Statistics
	STATISTICA			Mean CD VEH	Mean CD JZL	t-value	df	p
			CB1R	100	66.3312	2.94758	12	0.0121989
