# Supplementary material for: Cannabinoid signaling modulation through JZL184 restores key phenotypes of a mouse model for Williams–Beuren syndrome
Source: eLife journal article supplement (doi:10.7554/elife.72560), 2022-09-01

# Figure 4-figure supplement 1- source data 2

## CB1R

Name of the file: "WBS\_AMG\_VEH VS JZL\_CB1 v2"

### Gel A

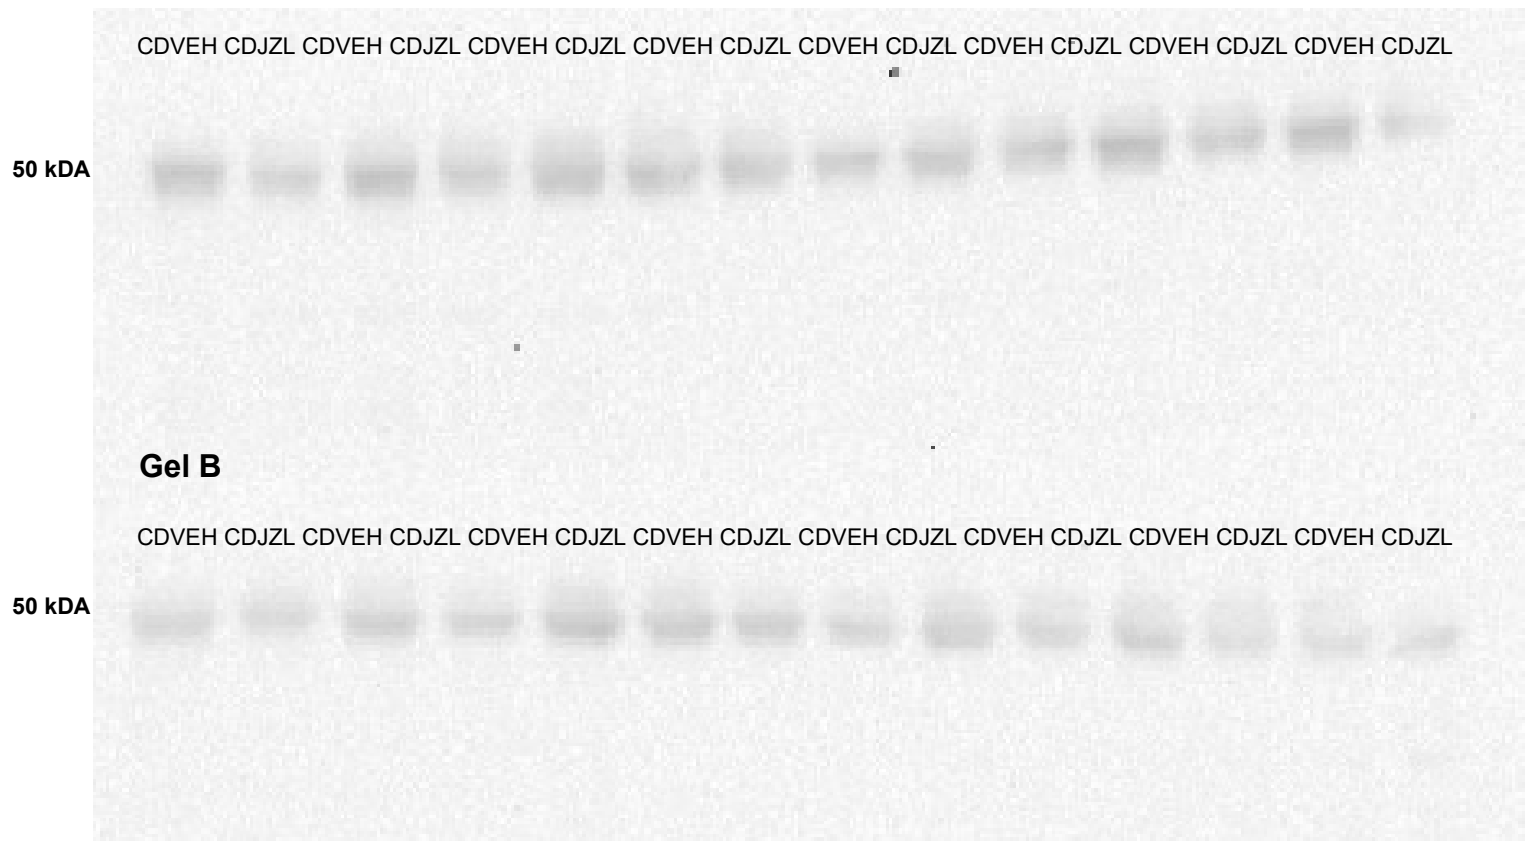

## Ponceau

Name of the file: "ponceubaix2"

CDVEH CDJZL CDVEH CDJZL

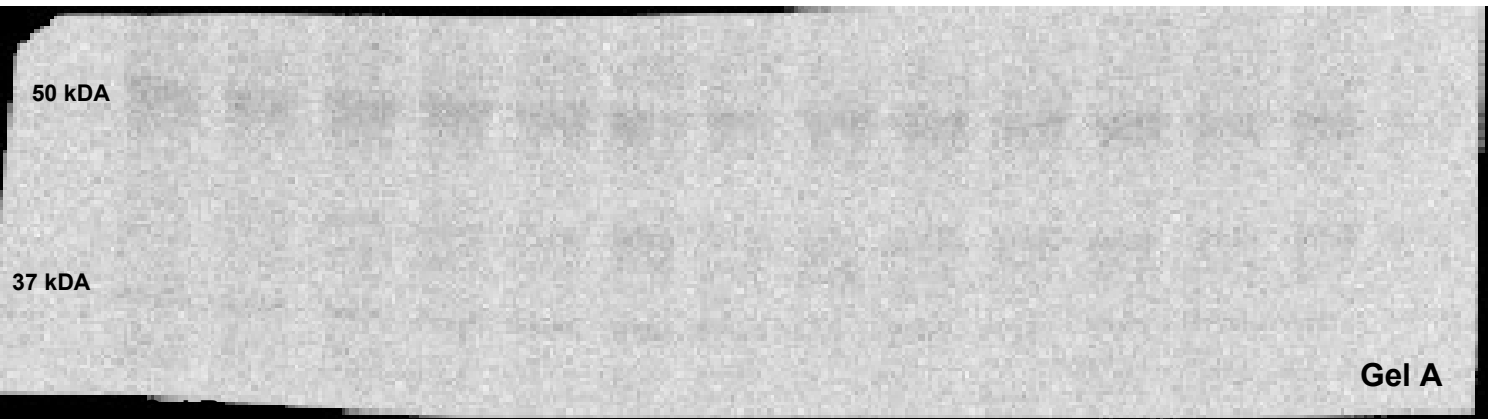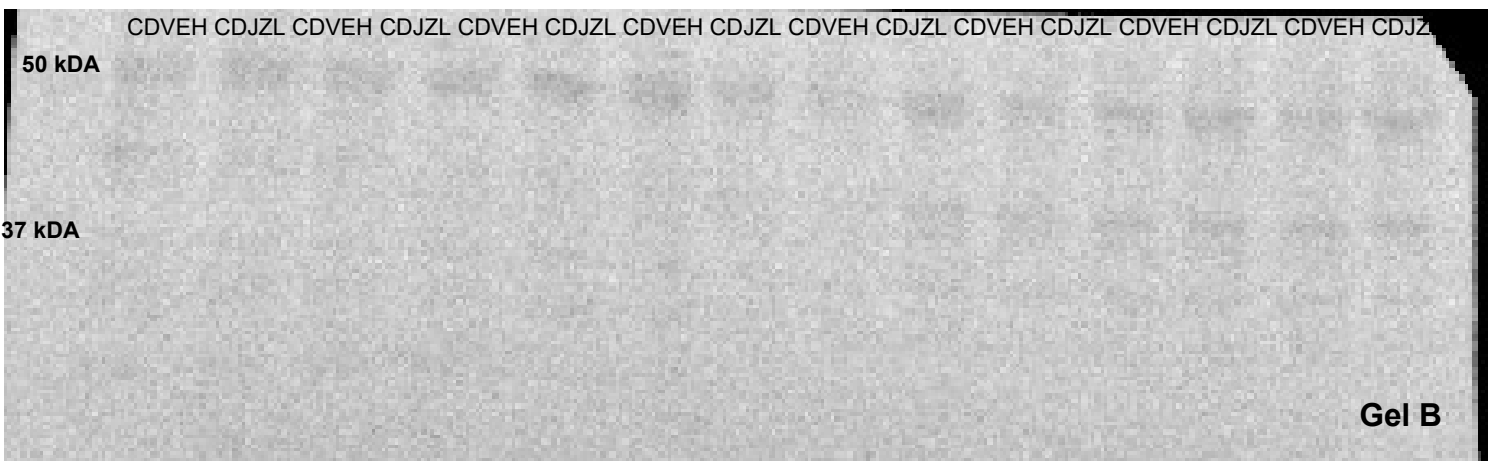

Supplement: fig4-figsupp1-data2 [file elife-72560-fig4-figsupp1-data2-v1.pdf]
