# Supplementary material for: Cannabinoid signaling modulation through JZL184 restores key phenotypes of a mouse model for Williams–Beuren syndrome
Source: eLife journal article supplement (doi:10.7554/elife.72560), 2022-09-01
Supplement: fig4-figsupp2-data1 [file Figure 4-figure supplement 2-source data 1.xlsx]

## Sheet: Figure 4-figure supplement 2a
	Figure 4-figure supplement 2a
	Row Data
	Density of NeuN+ cells
	(cells/mm2)
				WT VEH			WT JZL184			CD VEH			CD JZL184
				715.956			1027.66			1025.76			987.546
				940.845			762.191			886.151			885.518
				955.316			1220.94			987.826			1082.97
				928.257			998.772			953.977			1049.94
				1131.32						850.777
				811.8
			Mean	913.915		Mean	1002.39		Mean	940.899		Mean	1001.5
			SD	141.085		SD	188.069		SD	71.9275		SD	86.8544
			SEM	57.5976		SEM	94.0345		SEM	32.167		SEM	43.4272
	Statistics
	STATISTICA
					SS	Degr. of	MS	F	p
				Intercept	1.71803e+07	1	1.71803e+07	1035.12	2.9976e-15
				Genotype	785.26	1	785.26	0.0473125	0.830739
				Treatment	25641.4	1	25641.4	1.54491	0.232967
				Genotype*Treatment	896.83	1	896.83	0.0540346	0.819328
				Error	248960	15	16597.3
					Genotype	Treatment	{1}	{2}	{3}	{4}
				1	WT	VEH		0.727566	0.75487	0.568557
				2	WT	JZL	0.727566		0.752825	0.991822
				3	CD	VEH	0.75487	0.752825		0.486048
				4	CD	JZL	0.568557	0.991822	0.486048

## Sheet: Figure 4-figure supplement 2b
	Figure 4-figure supplement 2b
	Row Data
	Density of Dapi+ cells
	(cells/mm2)
				WT VEH			WT JZL184				CD VEH			CD JZL184
				2070.6			2159.61				2197.63			2346.85
				2080.76			2133.27				2187.16			2190.79
				2318.96			2193.58				2272.84			2395.65
				2402.2			2355.11				2375.22			2275.33
				2082.19							2119.14
				2265.54
			Mean	2203.38		Mean	2210.39			Mean	2230.4		Mean	2302.15
			SD	144.295		SD	99.5867			SD	97.5914		SD	89.1828
			SEM	58.9082		SEM	49.7934			SEM	43.6442		SEM	44.5914
	Statistics
	STATISTICA
				SS	Degr. of	MS	F	p
			Intercept	9.235e+07	1	9.235e+07	7074.28	0
			Genotype	16280.8	1	16280.8	1.24716	0.281666
			Treatment	7160.1	1	7160.1	0.548485	0.470372
			Genotype*Treatment	4836	1	4836	0.370452	0.551864
			Error	195815	15	13054.3
				Genotype	Treatment	{1}	{2}	{3}	{4}
			1	WT	VEH		0.927009	0.931732	0.569023
			2	WT	JZL	0.927009		0.793997	0.460122
			3	CD	VEH	0.931732	0.793997		0.355328
			4	CD	JZL	0.569023	0.460122	0.355328
