# Supplementary material for: Cannabinoid signaling modulation through JZL184 restores key phenotypes of a mouse model for Williams–Beuren syndrome
Source: eLife journal article supplement (doi:10.7554/elife.72560), 2022-09-01
Supplement: fig5-data1 [file Figure 5-source data 1.xlsx]

## Sheet: Figure 5a
	Figure 5a
	Row Data
	Heart/body weight ratio
	(% of control)
			WT VEH			CD VEH			WT JZL184			CD JZL184
			106.496			107.64			101.176			87.3474
			105.837			137.739			105.628			107.144
			102.786			113.972			105.3			92.263
			104.691			130.189			91.7533			120.557
			121.542			117.189			90.1496			108.141
			101.564			107.64			101.593			100.35
			70.9716			116.251			93.2882			111.78
			86.1122			102.434			112.446			100.525
			110.496			100.844			102.88			112.33
			94.2277			127.297			96.8875			110.491
			95.7759			107.186			91.4724			93.363
			103.747						111.968			96.3807
			101.624
			94.1294
		Mean	100		Mean	115.307		Mean	100.378		Mean	103.389
		SD	11.8339		SD	11.9711		SD	7.75113		SD	9.9106
		SEM	3.16275		SEM	3.60941		SEM	2.23756		SEM	2.86094
	Statistics
	STATISTICA
			SS	Degr. of	MS	F	p
		Intercept	533805	1	533805	4809.14	0
		Genotype	1019.94	1	1019.94	9.18879	0.00402928
		Treatment	404.735	1	404.735	3.64633	0.0625805
		Genotype*Treatment	459.576	1	459.576	4.1404	0.0477883
		Error	4994.91	45	110.998
				Genotype	Treatment	{1}	{2}	{3}	{4}
			1	WT	VEH		0.929912	0.00457935	0.709161
			2	WT	JZL	0.929912		0.00314623	0.484801
			3	CD	VEH	0.00457935	0.00314623		0.00784858
			4	CD	JZL	0.709161	0.484801	0.00784858

## Sheet: Figure 5b
	Figure 5b
	Row Data
	Cardiomyocyte cross-sectional area
	(um)
			WT VEH			CD VEH			WT JZL184			CD JZL184
			134.56			268.17			136.35			119.3
			137.71			280.57			127.67			146.17
			127.72			241.68			125.37			125.98
			151.88			209.34			157.03			147.38
						170.91						173.94
		Mean	137.968		Mean	234.134		Mean	136.605		Mean	142.554
		SD	10.1693		SD	44.6758		SD	14.4142		SD	21.4295
		SEM	5.08467		SEM	19.9796		SEM	7.20709		SEM	9.58356
	Statistics
	STATISTICA	SS	Degr. of	MS	F	p
		471267	1	471267	613.506	5.8209e-13
		11586.2	1	11586.2	15.0832	0.00165397
	Intercept	9598.12	1	9598.12	12.495	0.00329881
	Genotype	9043.55	1	9043.55	11.7731	0.00405342
	Treatment	10754.2	14	768.154
	Genotype*Treatment
	Error
		Genotype	Treatment	{1}	{2}	{3}	{4}
		WT	VEH		0.942714	0.000536125	0.808864
		WT	JZL	0.942714		0.00079307	0.945435
	1	CD	VEH	0.000536125	0.00079307		0.000377584
	2	CD	JZL	0.808864	0.945435	0.000377584
	3
	4

## Sheet: Figure 5d
	Figure 5d
	Row Data
	Ejection fraction (%)
			WT VEH			CD VEH			WT JZL184			CD JZL184
			68			64			70.5			61.5
			67			61.5			74.5			76
			74			67.5			70			62.5
			71			62			70.5			70
			73			61			73			64
			69			67			70.5			70.5
			68			66.5						74
		Mean	70		Mean	64.2143		Mean	71.5		Mean	68.3571
		SD	2.70801		SD	2.78174		SD	1.81659		SD	5.74249
		SEM	1.02353		SEM	1.0514		SEM	0.74162		SEM	2.17046
				SS	Degr. of	MS	F	p
	Statistics		Intercept	126193	1	126193	9522.92	0
	STATISTICA		Genotype	133.929	1	133.929	10.1066	0.0041823
			Treatment	53.4943	1	53.4943	4.03683	0.0563945
			Genotype*Treatment	11.7343	1	11.7343	0.885503	0.356478
			Error	304.786	23	13.2516
				Genotype	Treatment	{1}	{2}	{3}	{4}
			1	WT	VEH		0.457878	0.0206598	0.416762
			2	WT	JZL	0.457878		0.00662029	0.273204
			3	CD	VEH	0.0206598	0.00662029		0.0483816
			4	CD	JZL	0.416762	0.273204	0.0483816

## Sheet: Figure 5e
	Figure 5e
	Row Data
	Systolic Blood Pressure
	(mmHg)
			WT VEH			CD VEH			WT JZL184			CD JZL184
			128			171.5			101			101.667
			103.333			149.333			101.7			130.75
			102			177			124.727			120.636
			125.5			157.333			115.5			120.556
			139			162.5			117.5			117
			125.5						128.111			105.889
									123			120.444
		Mean	120.556		Mean	163.533		Mean	115.934		Mean	116.706
		SD	14.7338		SD	11.0223		SD	10.8305		SD	9.87213
		SEM	6.01506		SEM	4.92934		SEM	4.09356		SEM	3.73131
	Statistics			SS	Degr. of	MS	F	p
	STATISTICA		Intercept	409284	1	409284	3005.28	0
			Genotype	2933.93	1	2933.93	21.5432	0.000140319
			Treatment	4057.42	1	4057.42	29.7927	2.04837e-05
			Genotype*Treatment	2730.51	1	2730.51	20.0495	0.000207387
			Error	2859.95	21	136.188
				Genotype	Treatment	{1}	{2}	{3}	{4}
			1	WT	VEH		0.770002	0.000148223	0.569826
			2	WT	JZL	0.770002		0.000172174	0.909009
			3	CD	VEH	0.000148223	0.000172174		0.00014106
			4	CD	JZL	0.569826	0.909009	0.00014106

## Sheet: Figure 5f
	Figure 5f
	Row Data
	Cnr1
	(Fold change)
			WT VEH			CD VEH			WT JZL184			CD JZL184
			0.498218			1.44465			0.982782			1.14611
			1.06593			2.84886			1.33875			3.78737
			0.768943			3.58324			0.648041			3.5757
			0.867992			4.27532			2.01811			2.613
			0.864436			9.13793			1.22951			0.621156
			1.83943			3.4474			2.19976
			1.22959						3.15259
			1.21329						2.59309
			1.05867
		Mean	1.04517		Mean	4.1229		Mean	1.77033		Mean	2.34867
		SD	0.376373		SD	2.63505		SD	0.86122		SD	1.4209
		SEM	0.125458		SEM	1.07575		SEM	0.304487		SEM	0.635444
	Statistics
	STATISTICA			SS	Degr. of	MS	F	p
			Intercept	143.087	1	143.087	69.9144	1.43078e-08
			Genotype	22.1754	1	22.1754	10.8352	0.00307355
			Treatment	1.8258	1	1.8258	0.892113	0.354318
			Genotype*Treatment	10.3637	1	10.3637	5.06384	0.033867
			Error	49.1184	24	2.0466
				Genotype	Treatment	{1}	{2}	{3}	{4}
			1	wt	v		0.365178	0.00349233	0.241161
			2	wt	j	0.365178		0.0167309	0.468783
			3	cd	v	0.00349233	0.0167309		0.0333641
			4	cd	j	0.241161	0.468783	0.0333641
