# Supplementary material for: Cannabinoid signaling modulation through JZL184 restores key phenotypes of a mouse model for Williams–Beuren syndrome
Source: eLife journal article supplement (doi:10.7554/elife.72560), 2022-09-01
Supplement: fig5-figsupp1-data1 [file Figure 5-figure supplement 1-source data 1.xlsx]

## Sheet: Figure 5-figure supplement 1
	Figure 5-figure supplement 1
	Row Data
	Muscle proportion
	(%)
				WT VEH			WT JZL184			CD VEH			CD JZL184
				76.7114			69.2981			88.7102			69.0471
				66.4647			76.892			77.9289			81.719
				66.8703			85.1452			76.9029			63.4342
				79.5265			63.059			87.1571			69.881
				62.6345						71.4342			66.0083
				61.4249
			Mean	68.9387		Mean	73.5986		Mean	80.4267		Mean	70.0179
			SD	7.47149		SD	9.55247		SD	7.30474		SD	7.02316
			SEM	3.05022		SEM	4.77624		SEM	3.26678		SEM	3.14085
	Statistics
	STATISTICA
				SS	Degr. of	MS	F	p
			Intercept	105108	1	105108	1745.26	0
			Genotype	76.5617	1	76.5617	1.27126	0.276156
			Treatment	40.4686	1	40.4686	0.671957	0.424414
			Genotype*Treatment	278.036	1	278.036	4.61662	0.0473166
			Error	963.601	16	60.225
				Treatment	{1}	{2}	{3}	{4}
			1	VEH		0.624033	0.135738	0.830593
			2	JZL	0.624033		0.187644	0.480857
			3	VEH	0.135738	0.187644		0.121705
			4	JZL	0.830593	0.480857	0.121705
