# Supplementary material for: Cannabinoid signaling modulation through JZL184 restores key phenotypes of a mouse model for Williams–Beuren syndrome
Source: eLife journal article supplement (doi:10.7554/elife.72560), 2022-09-01
Supplement: fig5-figsupp2-data1 [file Figure 5-figure supplement 2-source data 1.xlsx]

## Sheet: Figure 5-figure supplement 2a
	Figure 5-figure supplement 2a
	Row Data
	Brain weight
	(mg)
				WT VEH			WT JZL184			CD VEH			CD JZL184
				489.3			464.9			439.9			422.5
				453.7			459.5			406.5			407.1
				439.6			487.8			411.7			405.5
				436.6			449.8			417.5			381.9
				462			461.6			421.5
				436.4			467.2
				465			460.9
				451.5			478.3
							452
			Mean	454.262		Mean	464.667		Mean	419.42		Mean	404.25
			SD	17.9553		SD	12.0376		SD	12.7864		SD	16.7558
			SEM	6.34817		SEM	4.01255		SEM	5.71825		SEM	8.3779
	Statistics
	STATISTICA
			SS	Degr. of	MS	F	p
		Intercept	4.42589e+06	1	4.42589e+06	19821.8	0
		Genotype	13225.7	1	13225.7	59.2328	1.11553e-07
		Treatment	33.1042	1	33.1042	0.148261	0.7039
		Genotype*Treatment	953.254	1	953.254	4.26925	0.0507802
		Error	4912.24	22	223.283
			Genotype	Treatment	{1}	{2}	{3}	{4}
		1	WT	VEH		0.247318	0.000764689	0.000156328
		2	WT	JZL	0.247318		0.000221453	0.000168396
		3	CD	VEH	0.000764689	0.000221453		0.097182
		4	CD	JZL	0.000156328	0.000168396	0.097182

## Sheet: Figure 5-figure supplement 2b
	Figure 5-figure supplement 2b
	Row Data
		%Brain weight (g) / Body weight (g)
				WT VEH			WT JZL184			CD VEH			CD JZL184
				1.52906			1.30958			1.4423			1.4569
				1.11201			1.4052			1.4364			1.38942
				1.38675			1.37408			1.53619			1.47993
				1.4457			1.36717			1.32962			1.43571
				1.27978			1.4291			1.84868
				1.47932			1.6055
				1.54485			1.49643
				1.4852			1.49937
							1.77255
			Mean	1.40783		Mean	1.47322		Mean	1.51864		Mean	1.44049
			SD	0.146557		SD	0.142629		SD	0.198469		SD	0.0385375
			SEM	0.0518159		SEM	0.047543		SEM	0.0887579		SEM	0.0192688
	Statistics
	STATISTICA
			SS	Degr. of	MS	F	p
		Intercept	49.7116	1	49.7116	2301.89	0
		Genotype	0.00888395	1	0.00888395	0.41137	0.527901
		Treatment	0.000237333	1	0.000237333	0.0109897	0.917459
		Genotype*Treatment	0.0300277	1	0.0300277	1.39043	0.250928
		Error	0.475112	22	0.021596
			Genotype	Treatment	{1}	{2}	{3}	{4}
		1	WT	VEH		0.731144	0.580347	0.708156
		2	WT	JZL	0.731144		0.603147	0.707518
		3	CD	VEH	0.580347	0.603147		0.641194
		4	CD	JZL	0.708156	0.707518	0.641194
