# Supplementary material for: Cannabinoid signaling modulation through JZL184 restores key phenotypes of a mouse model for Williams–Beuren syndrome
Source: eLife journal article supplement (doi:10.7554/elife.72560), 2022-09-01
Supplement: fig6-data1 [file Figure 6-source data 1.xlsx]

## Sheet: Figure 6a
	Figure 6a
	Row Data
		geneID	baseMean	log2FoldChange	lfcSE	stat	pvalue	padj
		ENSMUSG00000000001	1874.14	0.278615	0.108827	2.56016	0.0104623	0.0417596
		ENSMUSG00000000058	4644.62	0.637328	0.077319	8.24283	1.68183e-16	4.86553e-13
		ENSMUSG00000000085	2209.81	-0.331854	0.0697312	-4.75905	1.94508e-06	5.50598e-05
		ENSMUSG00000000093	364.012	0.478789	0.164139	2.91698	0.00353441	0.0185902
		ENSMUSG00000000168	20736.4	-0.44908	0.0826129	-5.43595	5.45039e-08	3.73696e-06
		ENSMUSG00000000183	71.734	-1.20978	0.435482	-2.77803	0.0054689	0.0256759
		ENSMUSG00000000194	2635.49	-0.237575	0.0729957	-3.25464	0.00113535	0.00776124
		ENSMUSG00000000266	1300.05	-0.274872	0.0767232	-3.58264	0.000340133	0.00305402
		ENSMUSG00000000278	933.988	0.403654	0.147279	2.74075	0.00612992	0.0280143
		ENSMUSG00000000295	162.338	0.708345	0.21763	3.25482	0.00113466	0.00776023
		ENSMUSG00000000305	181.597	-1.82475	0.340666	-5.35643	8.48812e-08	5.34504e-06
		ENSMUSG00000000317	2577.08	0.914771	0.177194	5.16255	2.43611e-07	1.09828e-05
		ENSMUSG00000000320	267.789	0.795264	0.257287	3.09096	0.00199512	0.0118902
		ENSMUSG00000000325	1387.64	-0.443944	0.11726	-3.78597	0.00015311	0.00163563
		ENSMUSG00000000359	356.172	0.35627	0.129985	2.74085	0.00612805	0.0280143
		ENSMUSG00000000374	4038.17	-0.276974	0.0659142	-4.20204	2.64519e-05	0.000422792
		ENSMUSG00000000384	3465.04	-0.212623	0.0757752	-2.80597	0.00501659	0.0241642
		ENSMUSG00000000440	780.803	0.513698	0.126022	4.07625	4.5767e-05	0.000643988
		ENSMUSG00000000441	7804.02	-0.213219	0.0718819	-2.96624	0.00301462	0.0162954
		ENSMUSG00000000486	122.202	0.883328	0.274526	3.21765	0.00129247	0.00854349
		ENSMUSG00000000489	2562.05	0.618788	0.128372	4.82027	1.43367e-06	4.4312e-05
		ENSMUSG00000000530	2255.62	0.342193	0.0930587	3.67717	0.000235834	0.00231748
		ENSMUSG00000000531	678.11	0.64133	0.1152	5.56712	2.5898e-08	2.10457e-06
		ENSMUSG00000000538	9714.67	-0.2682	0.0852999	-3.14419	0.00166545	0.0102688
		ENSMUSG00000000555	3063.91	-0.34404	0.124123	-2.77177	0.00557531	0.0260265
		ENSMUSG00000000561	2411.18	-0.239692	0.0675094	-3.5505	0.000384506	0.00334448
		ENSMUSG00000000581	1804.56	0.265365	0.0921575	2.87947	0.00398341	0.0203317
		ENSMUSG00000000594	1032.95	0.297161	0.10894	2.72775	0.0063767	0.0287797
		ENSMUSG00000000600	3752.88	-0.210524	0.0789414	-2.66684	0.00765685	0.03298
		ENSMUSG00000000628	15855.5	-0.463206	0.146041	-3.17174	0.00151526	0.00960907
		ENSMUSG00000000631	10193.8	-0.366598	0.100493	-3.64799	0.000264295	0.00252179
		ENSMUSG00000000738	5968.48	-0.248946	0.0757707	-3.28552	0.00101794	0.00716523
		ENSMUSG00000000740	19181.3	0.46864	0.0888794	5.27276	1.34385e-07	7.53666e-06
		ENSMUSG00000000753	1355.37	0.381467	0.140614	2.71287	0.00667034	0.0297156
		ENSMUSG00000000804	2145.59	-0.220174	0.0862056	-2.55405	0.0106477	0.0423711
		ENSMUSG00000000805	1600.06	0.690074	0.113575	6.07591	1.23286e-09	2.08626e-07
		ENSMUSG00000000826	5135.53	-0.226989	0.0634218	-3.57903	0.000344871	0.0030781
		ENSMUSG00000001020	288	0.933012	0.233176	4.00132	6.29897e-05	0.000831338
		ENSMUSG00000001025	1519.91	0.676548	0.189682	3.56674	0.000361446	0.00319789
		ENSMUSG00000001029	1467.25	0.551103	0.147756	3.72981	0.000191621	0.0019561
		ENSMUSG00000001053	757.427	0.74905	0.128137	5.84568	5.04497e-09	6.18436e-07
		ENSMUSG00000001056	640.375	0.411633	0.112787	3.64964	0.00026261	0.00251234
		ENSMUSG00000001098	3844.11	0.305286	0.0795264	3.8388	0.000123639	0.00138111
		ENSMUSG00000001100	7877.37	-0.219242	0.0595934	-3.67897	0.000234181	0.00230438
		ENSMUSG00000001105	1497.4	0.268023	0.0853519	3.14021	0.00168824	0.0103696
		ENSMUSG00000001119	5093.92	0.390037	0.135295	2.88286	0.00394083	0.0201833
		ENSMUSG00000001123	1936.34	0.676547	0.138029	4.90149	9.51107e-07	3.16999e-05
		ENSMUSG00000001128	519.968	0.51628	0.148159	3.48463	0.000492811	0.00405721
		ENSMUSG00000001143	1627.78	-0.315373	0.0952968	-3.30938	0.00093504	0.00667589
		ENSMUSG00000001150	1517.7	-0.272746	0.0827003	-3.29801	0.000973738	0.00690785
		ENSMUSG00000001151	3880.37	-0.39524	0.0997006	-3.96427	7.36196e-05	0.000926812
		ENSMUSG00000001158	1915.28	0.291292	0.0985356	2.95622	0.00311438	0.0167658
		ENSMUSG00000001166	64.6884	0.841121	0.309711	2.71582	0.00661114	0.029538
		ENSMUSG00000001173	1078.24	-0.234818	0.0842143	-2.78833	0.00529802	0.0251678
		ENSMUSG00000001240	2130.73	0.656659	0.13526	4.8548	1.20509e-06	3.86424e-05
		ENSMUSG00000001249	109.224	-0.941757	0.249912	-3.76836	0.000164325	0.00172699
		ENSMUSG00000001288	1459.67	0.66927	0.140881	4.75061	2.02804e-06	5.62197e-05
		ENSMUSG00000001289	6456.46	0.374338	0.0839677	4.45812	8.26799e-06	0.000171097
		ENSMUSG00000001300	1464.78	0.493985	0.0897389	5.50469	3.69822e-08	2.81551e-06
		ENSMUSG00000001313	301.044	0.533293	0.141186	3.77724	0.000158575	0.0016863
		ENSMUSG00000001333	1068.7	-0.494235	0.116589	-4.23911	2.24404e-05	0.000369705
		ENSMUSG00000001383	2241.66	0.19508	0.0786287	2.48102	0.0131006	0.0495426
		ENSMUSG00000001415	4638.52	-0.240835	0.0870941	-2.76522	0.00568838	0.0264232
		ENSMUSG00000001418	1955.05	0.292757	0.0693535	4.22123	2.42974e-05	0.000392181
		ENSMUSG00000001419	7830.84	-0.321189	0.10376	-3.0955	0.00196479	0.0117392
		ENSMUSG00000001424	3397.17	-0.236382	0.0766943	-3.08213	0.00205522	0.0121372
		ENSMUSG00000001440	7917.52	-0.264854	0.0611248	-4.33299	1.47096e-05	0.000270705
		ENSMUSG00000001441	5561.2	-0.378718	0.0839006	-4.51389	6.36491e-06	0.000139922
		ENSMUSG00000001482	4763.89	-0.231562	0.0703792	-3.2902	0.00100115	0.00706764
		ENSMUSG00000001739	172.194	0.954363	0.302715	3.15267	0.00161782	0.0100437
		ENSMUSG00000001741	776.054	0.465483	0.13649	3.41038	0.000648726	0.00501808
		ENSMUSG00000001750	999.181	0.415585	0.11981	3.46871	0.00052296	0.00426175
		ENSMUSG00000001761	967.394	0.387495	0.136652	2.83563	0.00457352	0.0225788
		ENSMUSG00000001768	1767.75	0.278384	0.109872	2.53372	0.011286	0.044246
		ENSMUSG00000001870	2896.23	-0.232049	0.0909786	-2.55059	0.0107541	0.0426655
		ENSMUSG00000001891	20113.2	-0.319863	0.12702	-2.51822	0.0117949	0.0458268
		ENSMUSG00000001924	9105.58	-0.218435	0.0857438	-2.54753	0.0108488	0.0429092
		ENSMUSG00000001943	284.467	-0.749992	0.187865	-3.99218	6.54677e-05	0.000853144
		ENSMUSG00000001946	4414.36	0.302885	0.092812	3.26342	0.00110075	0.00761473
		ENSMUSG00000001995	3918.38	-0.333629	0.0867124	-3.84753	0.000119313	0.00134783
		ENSMUSG00000001998	636.813	-0.336469	0.111184	-3.02625	0.00247609	0.0139854
		ENSMUSG00000001999	777.418	0.260774	0.100432	2.59652	0.00941744	0.0385307
		ENSMUSG00000002007	1807.71	-0.258971	0.0994144	-2.60497	0.00918834	0.0379199
		ENSMUSG00000002014	2202.15	0.326973	0.0866072	3.77536	0.000159776	0.00169191
		ENSMUSG00000002020	130.12	-0.74661	0.299282	-2.49467	0.0126075	0.0482072
		ENSMUSG00000002028	3820.36	-0.4262	0.143307	-2.97403	0.00293912	0.0159708
		ENSMUSG00000002031	707.756	0.278419	0.106327	2.6185	0.00883165	0.0368164
		ENSMUSG00000002032	858.108	-0.279951	0.0978248	-2.86176	0.0042129	0.0212481
		ENSMUSG00000002059	427.548	0.363508	0.121569	2.99013	0.00278856	0.0152848
		ENSMUSG00000002102	11725.7	0.267418	0.0890946	3.0015	0.00268651	0.0149203
		ENSMUSG00000002107	3296.38	-0.364426	0.0912483	-3.99379	6.50263e-05	0.000850172
		ENSMUSG00000002111	296.634	0.694708	0.233214	2.97885	0.00289336	0.0157577
		ENSMUSG00000002129	1832.31	-0.407826	0.0812942	-5.01667	5.25753e-07	2.01724e-05
		ENSMUSG00000002222	6992.17	-0.360564	0.0762871	-4.72641	2.28527e-06	6.12157e-05
		ENSMUSG00000002233	2879.75	0.478185	0.137934	3.46676	0.000526775	0.00428561
		ENSMUSG00000002249	704.291	-0.423229	0.103508	-4.08884	4.33542e-05	0.000620592
		ENSMUSG00000002266	300.564	-0.532646	0.164095	-3.24597	0.00117052	0.00792215
		ENSMUSG00000002280	2410.04	-0.305157	0.0679706	-4.48955	7.13744e-06	0.000151573
		ENSMUSG00000002325	1387.13	0.67979	0.130497	5.20922	1.89631e-07	9.33047e-06
		ENSMUSG00000002346	4147.25	-0.395418	0.140552	-2.81333	0.00490319	0.0237683
		ENSMUSG00000002379	15446.5	0.252732	0.0835474	3.02501	0.00248624	0.0140263
		ENSMUSG00000002395	5576.5	0.405002	0.0858616	4.71692	2.39443e-06	6.35511e-05
		ENSMUSG00000002416	9997.93	0.250548	0.0647624	3.86873	0.000109403	0.00126197
		ENSMUSG00000002496	5757.25	-0.275872	0.0979003	-2.81788	0.00483416	0.0235559
		ENSMUSG00000002504	8280.23	0.546519	0.0894437	6.11019	9.95103e-10	1.79927e-07
		ENSMUSG00000002546	5142.53	-0.24982	0.0754688	-3.31024	0.000932159	0.00666338
		ENSMUSG00000002550	1232.72	0.268483	0.0823737	3.25933	0.00111676	0.00769291
		ENSMUSG00000002602	5004.08	0.359037	0.132684	2.70595	0.00681092	0.0301931
		ENSMUSG00000002603	1132.53	0.515829	0.135714	3.80084	0.000144205	0.00156132
		ENSMUSG00000002617	292.302	0.545492	0.172403	3.16405	0.0015559	0.00975934
		ENSMUSG00000002625	2126.3	-0.320378	0.0693519	-4.6196	3.84489e-06	9.45856e-05
		ENSMUSG00000002679	594.862	0.388705	0.106487	3.65026	0.000261978	0.00251007
		ENSMUSG00000002732	994.975	0.447413	0.0943504	4.74203	2.11588e-06	5.80763e-05
		ENSMUSG00000002733	1274.35	0.239855	0.0839251	2.85797	0.00426362	0.0214327
		ENSMUSG00000002768	1480.41	0.360093	0.0889747	4.04714	5.18473e-05	0.000708189
		ENSMUSG00000002769	138.718	0.772231	0.255618	3.02103	0.00251915	0.0141788
		ENSMUSG00000002781	5982.93	-0.284933	0.107054	-2.66159	0.00777733	0.0333825
		ENSMUSG00000002812	6016.25	-0.284141	0.0800675	-3.54877	0.000387032	0.00335838
		ENSMUSG00000002831	18039.3	-0.337277	0.132548	-2.54456	0.0109415	0.0431958
		ENSMUSG00000002847	1101.74	0.718286	0.105268	6.82337	8.89295e-12	3.52753e-09
		ENSMUSG00000002881	2006.71	0.254229	0.0885647	2.87054	0.00409767	0.0208048
		ENSMUSG00000002885	3736.72	0.275074	0.0959035	2.86824	0.00412761	0.0208981
		ENSMUSG00000002980	10239.5	0.22429	0.067978	3.29945	0.000968744	0.00687918
		ENSMUSG00000002983	532.323	0.505136	0.147661	3.42092	0.000624102	0.00488509
		ENSMUSG00000002985	17150.8	0.755806	0.239372	3.15746	0.00159152	0.00992728
		ENSMUSG00000003032	3038.45	0.433353	0.108839	3.98159	6.84548e-05	0.00088096
		ENSMUSG00000003037	1427.33	0.264484	0.0785532	3.36694	0.000760083	0.00567317
		ENSMUSG00000003039	1991.35	0.274289	0.0864969	3.17108	0.00151874	0.00961844
		ENSMUSG00000003153	140.755	0.827012	0.242052	3.41668	0.000633907	0.00494844
		ENSMUSG00000003161	2452.01	0.36647	0.101852	3.59807	0.000320592	0.00291108
		ENSMUSG00000003184	1630.23	0.372917	0.0904817	4.12147	3.76466e-05	0.000556808
		ENSMUSG00000003199	2855.88	0.433741	0.0870316	4.98372	6.23724e-07	2.27832e-05
		ENSMUSG00000003200	1025.25	0.437219	0.138333	3.16063	0.00157428	0.00983667
		ENSMUSG00000003206	48.1212	0.893627	0.33365	2.67834	0.00739889	0.0321976
		ENSMUSG00000003228	2502.08	0.810833	0.11866	6.83321	8.30329e-12	3.4955e-09
		ENSMUSG00000003233	1640.65	-0.419657	0.0841101	-4.98938	6.05723e-07	2.23515e-05
		ENSMUSG00000003269	1750.18	0.185031	0.0722159	2.56219	0.0104014	0.0415939
		ENSMUSG00000003316	8990.21	-0.405628	0.0902301	-4.49548	6.94123e-06	0.000147872
		ENSMUSG00000003345	5422.63	0.242231	0.0864015	2.80355	0.00505434	0.0242652
		ENSMUSG00000003346	1870.11	0.42637	0.108783	3.91945	8.8752e-05	0.00106894
		ENSMUSG00000003352	209.186	0.484996	0.19148	2.53288	0.0113131	0.0443238
		ENSMUSG00000003380	6973.77	0.360047	0.0715267	5.03374	4.80995e-07	1.87346e-05
		ENSMUSG00000003420	4617.06	0.461134	0.0789591	5.84016	5.21493e-09	6.24348e-07
		ENSMUSG00000003421	1650.83	0.198368	0.0770328	2.57511	0.0100207	0.0404324
		ENSMUSG00000003429	14216.3	0.444401	0.115044	3.86288	0.00011206	0.00128647
		ENSMUSG00000003452	612.76	-0.497911	0.140867	-3.53462	0.000408355	0.00349518
		ENSMUSG00000003476	1527.96	-0.274127	0.103947	-2.63719	0.00835965	0.0353189
		ENSMUSG00000003500	1397.11	0.384663	0.125993	3.05305	0.00226528	0.0130654
		ENSMUSG00000003528	351.778	0.520541	0.177702	2.92929	0.00339741	0.0179881
		ENSMUSG00000003531	1661.35	0.247895	0.0814061	3.04516	0.00232557	0.0132857
		ENSMUSG00000003549	1121.69	0.287819	0.110833	2.59686	0.00940791	0.0385184
		ENSMUSG00000003573	483.693	0.701286	0.17607	3.98299	6.80549e-05	0.000878941
		ENSMUSG00000003575	879.603	-0.352733	0.108467	-3.252	0.00114597	0.0078117
		ENSMUSG00000003585	41.2333	1.05192	0.362348	2.90307	0.00369522	0.0192064
		ENSMUSG00000003644	393.592	0.524451	0.165874	3.16173	0.00156832	0.00981914
		ENSMUSG00000003680	678.54	0.384295	0.114352	3.36065	0.000777595	0.00577408
		ENSMUSG00000003731	5209.36	-0.444213	0.094401	-4.70559	2.53129e-06	6.70605e-05
		ENSMUSG00000003810	8318.93	-0.520615	0.108761	-4.78678	1.69477e-06	5.00614e-05
		ENSMUSG00000003812	534.612	0.277831	0.098589	2.81807	0.00483135	0.0235559
		ENSMUSG00000003847	3655.92	-0.37641	0.131044	-2.87239	0.00407376	0.0207052
		ENSMUSG00000003865	5990.07	-0.464836	0.124402	-3.73656	0.000186555	0.00192065
		ENSMUSG00000003873	1193.46	0.554729	0.104036	5.33211	9.70788e-08	5.92509e-06
		ENSMUSG00000003949	917.647	-0.545097	0.191882	-2.8408	0.00450009	0.0223
		ENSMUSG00000003970	18615.2	0.299643	0.0791217	3.78711	0.000152408	0.00162941
		ENSMUSG00000003992	1864.73	-0.299799	0.107754	-2.78224	0.00539844	0.0254111
		ENSMUSG00000004032	2543.25	0.260337	0.0702816	3.70419	0.000212067	0.0021332
		ENSMUSG00000004044	13160.3	0.516949	0.077744	6.64938	2.9433e-11	8.51496e-09
		ENSMUSG00000004054	2239.11	0.483798	0.0919773	5.25997	1.44082e-07	7.71904e-06
		ENSMUSG00000004069	9009.65	-0.290406	0.0845847	-3.43332	0.000596238	0.00472063
		ENSMUSG00000004085	12208.1	-0.490352	0.11995	-4.08795	4.35198e-05	0.000622049
		ENSMUSG00000004096	2450.74	0.192502	0.0690511	2.78782	0.00530639	0.0251814
		ENSMUSG00000004221	2894.88	-0.26685	0.106929	-2.49557	0.0125754	0.0481227
		ENSMUSG00000004266	330.006	0.78205	0.171956	4.54796	5.41695e-06	0.000122623
		ENSMUSG00000004285	2177.9	0.238551	0.083894	2.84348	0.00446237	0.0221739
		ENSMUSG00000004347	4772.38	-0.617604	0.159533	-3.87133	0.000108242	0.00125559
		ENSMUSG00000004360	48.3829	-0.895364	0.348915	-2.56614	0.0102837	0.0412394
		ENSMUSG00000004364	7651.92	-0.370934	0.0795724	-4.66159	3.13776e-06	7.97675e-05
		ENSMUSG00000004383	3556.83	-0.38601	0.090522	-4.26426	2.00563e-05	0.00034011
		ENSMUSG00000004508	1677	0.269119	0.0999628	2.69219	0.00709844	0.031181
		ENSMUSG00000004530	2150.75	0.367301	0.100527	3.65374	0.000258448	0.00248567
		ENSMUSG00000004552	12.1719	2.32227	0.937052	2.47827	0.013202	0.0497829
		ENSMUSG00000004631	918.826	0.483258	0.105185	4.59437	4.34058e-06	0.00010447
		ENSMUSG00000004655	39004.2	0.560916	0.111604	5.02593	5.00986e-07	1.93247e-05
		ENSMUSG00000004667	3910.3	0.23704	0.0767446	3.08868	0.00201047	0.0119529
		ENSMUSG00000004677	2432.27	-0.360735	0.083417	-4.32448	1.52892e-05	0.000277838
		ENSMUSG00000004698	1371.17	-0.357292	0.124974	-2.85894	0.00425061	0.0213861
		ENSMUSG00000004730	1250.35	0.421888	0.143925	2.93131	0.00337536	0.0179041
		ENSMUSG00000004748	6980.12	-0.194591	0.062756	-3.10075	0.00193031	0.0115762
		ENSMUSG00000004789	34330.3	-0.315603	0.0968005	-3.26035	0.00111275	0.00767808
		ENSMUSG00000004791	367.065	0.535946	0.203966	2.62762	0.0085984	0.0360405
		ENSMUSG00000004798	5693.49	-0.2519	0.0701635	-3.59019	0.000330435	0.00297989
		ENSMUSG00000004814	150.627	0.75747	0.268163	2.82466	0.00473306	0.0231845
		ENSMUSG00000004837	900.835	0.711695	0.152541	4.66561	3.07703e-06	7.86033e-05
		ENSMUSG00000004880	1420.27	0.236509	0.0783988	3.01675	0.00255504	0.0143402
		ENSMUSG00000004891	3729	0.550513	0.128161	4.29549	1.74306e-05	0.000306732
		ENSMUSG00000004945	3913.75	0.183091	0.0715764	2.55798	0.0105281	0.0419415
		ENSMUSG00000004952	599.589	0.534902	0.161072	3.32089	0.000897293	0.00646704
		ENSMUSG00000005034	3371.56	-0.19767	0.0688009	-2.87308	0.00406492	0.0206748
		ENSMUSG00000005054	598.437	0.510362	0.123923	4.11839	3.81526e-05	0.000562565
		ENSMUSG00000005069	1529.18	-0.214034	0.0801844	-2.66927	0.00760161	0.0327937
		ENSMUSG00000005089	33.7964	-1.79409	0.481069	-3.72939	0.000191947	0.00195667
		ENSMUSG00000005107	120.359	0.888493	0.230981	3.84661	0.000119764	0.00135132
		ENSMUSG00000005125	2516.68	0.284886	0.103029	2.76512	0.00569016	0.0264232
		ENSMUSG00000005198	2501.49	-0.36931	0.11725	-3.14977	0.00163397	0.0101222
		ENSMUSG00000005220	12365.1	-0.364423	0.132693	-2.74637	0.00602583	0.0276359
		ENSMUSG00000005237	97.8218	0.6972	0.238679	2.92107	0.00348827	0.0183951
		ENSMUSG00000005312	3117.29	-0.214533	0.0659054	-3.25516	0.00113328	0.00775812
		ENSMUSG00000005371	2300.09	-0.18275	0.0733274	-2.49225	0.0126937	0.0484345
		ENSMUSG00000005410	200.152	0.657382	0.196412	3.34695	0.000817056	0.0060024
		ENSMUSG00000005413	792.41	1.72391	0.630673	2.73345	0.00626749	0.0283842
		ENSMUSG00000005469	11960.8	-0.325182	0.0630956	-5.15379	2.55272e-07	1.14674e-05
		ENSMUSG00000005483	1876.89	0.834464	0.286556	2.91205	0.00359064	0.0187979
		ENSMUSG00000005493	74.5046	-0.741532	0.266372	-2.78382	0.00537231	0.0253627
		ENSMUSG00000005501	2110.3	-0.419394	0.083115	-5.04595	4.51282e-07	1.78844e-05
		ENSMUSG00000005506	5792.21	-0.199836	0.0665142	-3.00442	0.0026609	0.0148257
		ENSMUSG00000005534	10006.4	-0.551687	0.115337	-4.78327	1.72471e-06	5.05017e-05
		ENSMUSG00000005580	1238.16	-0.434626	0.0977641	-4.44566	8.76241e-06	0.00017877
		ENSMUSG00000005609	1396.95	-0.217709	0.0819838	-2.65551	0.00791883	0.0338738
		ENSMUSG00000005610	55261.2	-0.218212	0.0672829	-3.2432	0.00118195	0.0079855
		ENSMUSG00000005611	787.293	0.404731	0.124952	3.2391	0.00119908	0.00806728
		ENSMUSG00000005615	6688.27	-0.306782	0.0894932	-3.42799	0.000608067	0.00479229
		ENSMUSG00000005625	5015.81	0.222759	0.0772653	2.88304	0.00393856	0.0201811
		ENSMUSG00000005628	992.005	-0.702091	0.127915	-5.48873	4.04842e-08	3.0031e-06
		ENSMUSG00000005683	81369.4	-0.356095	0.105921	-3.36189	0.0007741	0.00575358
		ENSMUSG00000005686	2418.57	-0.195146	0.0758587	-2.5725	0.0100968	0.0406645
		ENSMUSG00000005813	2540.16	-0.230088	0.0881793	-2.60932	0.00907233	0.0376236
		ENSMUSG00000005871	3936.3	-0.239857	0.0851846	-2.81573	0.00486658	0.0236463
		ENSMUSG00000005881	2302.08	0.228528	0.0814042	2.80733	0.00499542	0.0240782
		ENSMUSG00000005882	11809.8	-0.288874	0.110168	-2.62211	0.00873871	0.0365153
		ENSMUSG00000005886	3197.39	-0.468538	0.081954	-5.71708	1.08368e-08	1.08857e-06
		ENSMUSG00000005899	1275.31	-0.26161	0.0984987	-2.65598	0.00790786	0.0338424
		ENSMUSG00000005907	823.032	-0.38801	0.102126	-3.79932	0.000145096	0.00156745
		ENSMUSG00000005950	1242.57	-0.482173	0.138238	-3.48798	0.000486691	0.00402285
		ENSMUSG00000005951	131.528	0.54643	0.209525	2.60794	0.00910884	0.0377318
		ENSMUSG00000005958	567.529	-0.751076	0.150173	-5.00142	5.69089e-07	2.13815e-05
		ENSMUSG00000005973	1762.56	0.29497	0.0929504	3.17341	0.00150658	0.00958723
		ENSMUSG00000005980	216.804	-0.527634	0.190278	-2.77296	0.00555483	0.0259614
		ENSMUSG00000005981	9479.63	-0.333094	0.11465	-2.90531	0.00366895	0.0191042
		ENSMUSG00000005982	2494.47	-0.236719	0.0730357	-3.24114	0.00119053	0.00803594
		ENSMUSG00000006005	8192.06	-0.331226	0.100648	-3.29094	0.000998521	0.00705254
		ENSMUSG00000006057	79859.3	0.342632	0.0877107	3.90639	9.36865e-05	0.00111813
		ENSMUSG00000006134	1939.83	-0.261546	0.0833326	-3.13857	0.00169772	0.010419
		ENSMUSG00000006169	3300	-0.216593	0.0720033	-3.0081	0.00262885	0.014682
		ENSMUSG00000006219	13956.9	-0.415737	0.0689598	-6.02869	1.6529e-09	2.57088e-07
		ENSMUSG00000006221	101035	-0.253398	0.078164	-3.24188	0.00118744	0.00801884
		ENSMUSG00000006262	1897.52	-0.508299	0.108293	-4.69375	2.68242e-06	7.00383e-05
		ENSMUSG00000006276	2424.82	-0.342492	0.0922589	-3.71229	0.000205396	0.00208046
		ENSMUSG00000006288	741.642	0.294567	0.0983711	2.99445	0.00274941	0.0151563
		ENSMUSG00000006315	5162.23	0.266198	0.0783102	3.39928	0.000675647	0.00517376
		ENSMUSG00000006333	21181.4	0.258265	0.0998538	2.58643	0.00969759	0.0394698
		ENSMUSG00000006344	622.93	0.370017	0.136472	2.7113	0.00670202	0.0298006
		ENSMUSG00000006360	2425.01	0.602228	0.176026	3.42124	0.000623358	0.0048819
		ENSMUSG00000006373	1269.72	0.454044	0.11127	4.08057	4.49251e-05	0.000635982
		ENSMUSG00000006386	4891.75	0.389674	0.0852232	4.5724	4.82173e-06	0.000113041
		ENSMUSG00000006390	991.939	0.499108	0.122321	4.0803	4.49782e-05	0.000635982
		ENSMUSG00000006412	1664.51	0.25957	0.0785464	3.30467	0.000950883	0.00676563
		ENSMUSG00000006494	10176.7	-0.439184	0.124996	-3.5136	0.000442084	0.00373089
		ENSMUSG00000006498	2231.87	0.409839	0.103632	3.95477	7.66099e-05	0.000950396
		ENSMUSG00000006527	769.794	-0.26556	0.0961004	-2.76337	0.00572086	0.0265324
		ENSMUSG00000006542	227.99	-0.77129	0.178339	-4.32484	1.5264e-05	0.000277729
		ENSMUSG00000006589	602.978	0.359061	0.110133	3.26026	0.0011131	0.00767808
		ENSMUSG00000006676	6391.28	-0.351641	0.0922606	-3.81138	0.000138192	0.00150637
		ENSMUSG00000006699	9857.71	0.330394	0.073948	4.46792	7.8983e-06	0.000164387
		ENSMUSG00000006720	37.8332	1.00466	0.359109	2.79765	0.00514763	0.0246097
		ENSMUSG00000006728	2558.98	0.226247	0.0715629	3.16152	0.0015695	0.00981914
		ENSMUSG00000006731	163.707	0.6692	0.237089	2.82257	0.00476402	0.0232966
		ENSMUSG00000006740	10696.7	-0.439445	0.100124	-4.389	1.13873e-05	0.000221692
		ENSMUSG00000006763	288.986	0.368703	0.138268	2.66658	0.00766279	0.03298
		ENSMUSG00000006782	497.571	0.381389	0.135735	2.80981	0.00495703	0.0239486
		ENSMUSG00000007030	786.121	-0.503263	0.130862	-3.84575	0.000120185	0.00135395
		ENSMUSG00000007036	3353.99	0.211916	0.0686237	3.08809	0.00201444	0.0119618
		ENSMUSG00000007039	1042.63	0.536661	0.15525	3.45675	0.000546729	0.00440493
		ENSMUSG00000007041	2421.86	0.499057	0.128668	3.87863	0.000105045	0.00122835
		ENSMUSG00000007279	1568.42	-0.375533	0.082176	-4.56986	4.88042e-06	0.000114047
		ENSMUSG00000007458	3550.71	0.270428	0.0641487	4.21564	2.49074e-05	0.000399873
		ENSMUSG00000007570	468.082	0.480679	0.131073	3.66727	0.000245153	0.00237996
		ENSMUSG00000007589	588.508	0.336724	0.112571	2.99121	0.00277873	0.0152532
		ENSMUSG00000007617	2534.59	-0.647913	0.162161	-3.9955	6.45591e-05	0.000847412
		ENSMUSG00000007655	16934.2	0.65839	0.093859	7.01467	2.30497e-12	1.19076e-09
		ENSMUSG00000007670	1475.78	-0.221315	0.0759157	-2.91527	0.00355378	0.0186725
		ENSMUSG00000007721	2084.43	0.220016	0.0854726	2.57411	0.0100499	0.0405236
		ENSMUSG00000007872	3103.12	0.882161	0.120113	7.34444	2.06618e-13	1.86795e-10
		ENSMUSG00000007892	26121.3	0.509899	0.111826	4.55976	5.12116e-06	0.000118353
		ENSMUSG00000007950	1236.36	0.261426	0.0783765	3.33552	0.000851397	0.00620114
		ENSMUSG00000008036	2095.61	0.220514	0.0882109	2.49985	0.0124246	0.0476716
		ENSMUSG00000008136	103726	0.302365	0.107542	2.8116	0.00492961	0.0238564
		ENSMUSG00000008307	113.709	-1.12134	0.213354	-5.2558	1.47379e-07	7.84768e-06
		ENSMUSG00000008318	228.805	-0.48218	0.185939	-2.59321	0.00950838	0.0388527
		ENSMUSG00000008333	965.762	0.315816	0.102106	3.093	0.00198142	0.0118239
		ENSMUSG00000008348	75527.5	-0.377035	0.109287	-3.44994	0.000560707	0.00448597
		ENSMUSG00000008373	1160.14	0.269412	0.0765665	3.51867	0.000433719	0.00367531
		ENSMUSG00000008384	522.676	0.597619	0.173771	3.43911	0.000583623	0.00463343
		ENSMUSG00000008393	2222.32	0.549373	0.135193	4.06362	4.83174e-05	0.000670427
		ENSMUSG00000008398	2754.89	0.534733	0.118688	4.50536	6.62611e-06	0.000143914
		ENSMUSG00000008435	1919.33	-0.421499	0.162268	-2.59756	0.0093889	0.038502
		ENSMUSG00000008475	2608.58	0.545461	0.117034	4.66072	3.15107e-06	7.98253e-05
		ENSMUSG00000008575	5155.1	-0.509548	0.101182	-5.03597	4.75447e-07	1.86378e-05
		ENSMUSG00000008604	4459.48	-0.240989	0.0822894	-2.92856	0.00340535	0.018017
		ENSMUSG00000008658	1892.81	-0.358404	0.128464	-2.78992	0.00527209	0.025061
		ENSMUSG00000008668	16382.9	0.492756	0.0945592	5.21108	1.87741e-07	9.30024e-06
		ENSMUSG00000008682	22980.1	0.501097	0.0921824	5.43593	5.45108e-08	3.73696e-06
		ENSMUSG00000008683	12026.8	0.470114	0.112002	4.19735	2.70055e-05	0.000429741
		ENSMUSG00000008690	3978.91	0.186138	0.0685868	2.7139	0.00664958	0.0296505
		ENSMUSG00000008730	5427.4	-0.195826	0.0719732	-2.72082	0.00651196	0.0292351
		ENSMUSG00000008734	1042.37	0.512713	0.11998	4.27332	1.9258e-05	0.0003285
		ENSMUSG00000008822	530.298	0.303313	0.118384	2.56212	0.0104035	0.0415939
		ENSMUSG00000008855	5801.53	0.230535	0.0798595	2.88676	0.00389232	0.0200009
		ENSMUSG00000008976	3373.58	-0.297901	0.0747918	-3.98307	6.80309e-05	0.000878941
		ENSMUSG00000009013	1947.57	0.527903	0.147283	3.58428	0.000338009	0.00303684
		ENSMUSG00000009073	7364.5	-0.241618	0.0801461	-3.01472	0.00257219	0.0144045
		ENSMUSG00000009090	4301.4	-0.437822	0.092016	-4.75811	1.95418e-06	5.51018e-05
		ENSMUSG00000009207	697.492	-0.455264	0.120897	-3.76572	0.00016607	0.00174199
		ENSMUSG00000009281	1438.02	0.608492	0.127731	4.76384	1.89939e-06	5.4084e-05
		ENSMUSG00000009406	915.96	-0.225168	0.0831657	-2.70747	0.0067799	0.0300924
		ENSMUSG00000009545	2253.78	-0.311704	0.102098	-3.05298	0.00226579	0.0130654
		ENSMUSG00000009555	1389.76	0.243774	0.0854688	2.8522	0.00434173	0.0216862
		ENSMUSG00000009563	565.244	0.352866	0.113104	3.11984	0.00180952	0.0109655
		ENSMUSG00000009575	5121.48	-0.22385	0.0836569	-2.67581	0.00745499	0.0323541
		ENSMUSG00000009621	1186.29	-0.369204	0.0970913	-3.80264	0.000143161	0.00155234
		ENSMUSG00000009630	2152.8	0.194116	0.0771937	2.51466	0.0119148	0.0462282
		ENSMUSG00000009633	2210.1	0.751323	0.119977	6.26223	3.79518e-10	7.52017e-08
		ENSMUSG00000009647	873.155	-0.238392	0.0893006	-2.66955	0.00759529	0.0327886
		ENSMUSG00000009687	1026.7	0.489633	0.174779	2.80144	0.00508754	0.0244084
		ENSMUSG00000009772	299.123	0.471101	0.157795	2.98552	0.00283098	0.0154587
		ENSMUSG00000009876	501.828	0.815101	0.162158	5.02658	4.99298e-07	1.93111e-05
		ENSMUSG00000009927	13844.6	0.508182	0.103878	4.89212	9.9756e-07	3.30199e-05
		ENSMUSG00000010025	1980.84	0.207712	0.0784723	2.64694	0.00812229	0.0345861
		ENSMUSG00000010064	4633.43	-0.498444	0.125168	-3.98221	6.82769e-05	0.000880237
		ENSMUSG00000010066	86.6192	-0.914286	0.266738	-3.42766	0.000608818	0.00479229
		ENSMUSG00000010067	1287.41	0.519465	0.106157	4.89338	9.91187e-07	3.28842e-05
		ENSMUSG00000010080	1086.17	-0.644804	0.18862	-3.41853	0.000629608	0.00492019
		ENSMUSG00000010122	3737.96	-0.368143	0.130801	-2.81452	0.00488497	0.0237197
		ENSMUSG00000010175	3504.51	-0.681086	0.161188	-4.22542	2.38496e-05	0.000387188
		ENSMUSG00000010277	27320.5	-0.290611	0.0757039	-3.83878	0.000123646	0.00138111
		ENSMUSG00000010290	1991.74	-0.271577	0.107114	-2.53541	0.0112317	0.0440884
		ENSMUSG00000010307	1140.63	0.613033	0.133596	4.58872	4.45969e-06	0.000106627
		ENSMUSG00000010358	1175.06	0.423319	0.120497	3.51311	0.00044289	0.00373551
		ENSMUSG00000010376	3658.53	0.277384	0.0817806	3.3918	0.000694345	0.00528745
		ENSMUSG00000010453	4101.84	-0.215092	0.0817249	-2.63191	0.00849075	0.0357239
		ENSMUSG00000010538	176.045	0.596261	0.184038	3.23988	0.0011958	0.0080527
		ENSMUSG00000010554	1419.41	-0.291524	0.111944	-2.60419	0.00920915	0.0379733
		ENSMUSG00000010607	937.653	0.358563	0.111403	3.21862	0.0012881	0.0085235
		ENSMUSG00000010608	4469.75	-0.369744	0.0955716	-3.86877	0.000109388	0.00126197
		ENSMUSG00000010914	9070.55	-0.302728	0.121551	-2.49055	0.0127545	0.0485725
		ENSMUSG00000011034	52.5938	-0.820507	0.315271	-2.60255	0.00925337	0.0381122
		ENSMUSG00000011114	1862.92	0.340226	0.0934506	3.64071	0.000271892	0.00258066
		ENSMUSG00000011256	4738.35	-0.775717	0.280197	-2.76847	0.00563204	0.0262206
		ENSMUSG00000011257	20807.6	-0.211858	0.0811772	-2.60982	0.00905893	0.0375788
		ENSMUSG00000011382	1720.76	-0.313458	0.0976015	-3.21162	0.00131991	0.00867446
		ENSMUSG00000011752	3921.93	-0.332515	0.0872125	-3.8127	0.000137459	0.0015029
		ENSMUSG00000012117	1886.7	-0.326555	0.083608	-3.90579	9.39178e-05	0.00111997
		ENSMUSG00000012405	16832.2	0.401862	0.0914917	4.39233	1.12142e-05	0.000219801
		ENSMUSG00000012422	1231.31	0.285975	0.107433	2.66188	0.00777047	0.033363
		ENSMUSG00000012428	3146.42	0.339278	0.120562	2.81415	0.00489069	0.0237252
		ENSMUSG00000012483	527.006	0.407356	0.128064	3.18088	0.0014683	0.00939777
		ENSMUSG00000012848	17683	0.547803	0.100622	5.44416	5.20519e-08	3.655e-06
		ENSMUSG00000013033	1147.31	-0.742936	0.126171	-5.88831	3.90157e-09	5.26404e-07
		ENSMUSG00000013089	991.435	-0.37651	0.142193	-2.64788	0.00809976	0.0345398
		ENSMUSG00000013236	2931.39	-0.322971	0.0931977	-3.46544	0.000529358	0.00430178
		ENSMUSG00000013593	57439.2	-0.24681	0.0961538	-2.56682	0.0102635	0.0411705
		ENSMUSG00000013622	2521.84	0.231274	0.0772147	2.9952	0.00274263	0.0151305
		ENSMUSG00000013629	894.104	-0.334483	0.126325	-2.64779	0.00810188	0.0345398
		ENSMUSG00000013698	7307.76	0.416199	0.106524	3.90709	9.3416e-05	0.00111675
		ENSMUSG00000013707	157.945	0.799945	0.230968	3.46345	0.00053329	0.00431917
		ENSMUSG00000013822	1238.23	0.405215	0.100862	4.01751	5.88162e-05	0.000787755
		ENSMUSG00000014294	12133.6	0.340496	0.0762386	4.46619	7.96267e-06	0.000165488
		ENSMUSG00000014313	48412.5	0.372544	0.0867977	4.2921	1.76994e-05	0.00031033
		ENSMUSG00000014329	1395.14	0.326049	0.128186	2.54356	0.0109728	0.0432602
		ENSMUSG00000014353	1900.74	-0.21622	0.0776503	-2.78454	0.00536033	0.0253472
		ENSMUSG00000014355	4149.28	-0.200401	0.0749444	-2.67399	0.00749536	0.0324515
		ENSMUSG00000014426	2427.52	-0.353151	0.104405	-3.38251	0.000718263	0.00542825
		ENSMUSG00000014453	196.036	-0.72212	0.211856	-3.40855	0.0006531	0.00504113
		ENSMUSG00000014498	3447.5	-0.488333	0.0989	-4.93765	7.907e-07	2.72971e-05
		ENSMUSG00000014503	841.139	-0.276636	0.106532	-2.59674	0.00941128	0.0385213
		ENSMUSG00000014592	5462.94	-0.346007	0.0683692	-5.06086	4.17365e-07	1.67699e-05
		ENSMUSG00000014601	1748.75	-0.212873	0.0767569	-2.77334	0.00554845	0.0259484
		ENSMUSG00000014606	31015.4	-0.202839	0.0736182	-2.75529	0.00586407	0.0270484
		ENSMUSG00000014773	447.032	0.443922	0.146642	3.02724	0.00246799	0.0139451
		ENSMUSG00000014837	191.897	-0.401487	0.152656	-2.63002	0.00853801	0.0358706
		ENSMUSG00000014846	1701.43	0.630801	0.194972	3.23534	0.00121496	0.00814761
		ENSMUSG00000014905	2716.32	-0.34702	0.131614	-2.63664	0.0083731	0.0353523
		ENSMUSG00000014932	1385.13	0.327768	0.132166	2.47997	0.0131392	0.0496138
		ENSMUSG00000015002	4520.6	-0.268309	0.0847917	-3.16433	0.0015544	0.00975884
		ENSMUSG00000015013	1473.29	0.384396	0.0862351	4.45753	8.29078e-06	0.000171323
		ENSMUSG00000015016	1380.16	-0.349434	0.111084	-3.14567	0.00165707	0.0102302
		ENSMUSG00000015053	899.285	0.584832	0.115544	5.06156	4.15832e-07	1.67549e-05
		ENSMUSG00000015094	1171.38	0.378078	0.125936	3.00213	0.00268094	0.0149033
		ENSMUSG00000015112	8014.02	-0.319133	0.111237	-2.86894	0.00411852	0.0208605
		ENSMUSG00000015120	2954.29	0.229168	0.0771934	2.96874	0.00299019	0.0161936
		ENSMUSG00000015202	1460.01	-0.955069	0.165822	-5.75961	8.43067e-09	8.96688e-07
		ENSMUSG00000015217	3788.34	-0.180975	0.0665351	-2.71999	0.00652839	0.0292816
		ENSMUSG00000015224	145.982	0.728504	0.230719	3.15753	0.00159112	0.00992728
		ENSMUSG00000015247	333.254	0.454874	0.141587	3.21267	0.00131505	0.00865616
		ENSMUSG00000015289	810.518	0.536525	0.0954374	5.62175	1.89029e-08	1.70957e-06
		ENSMUSG00000015340	804.394	0.409043	0.155797	2.62548	0.00865272	0.0362202
		ENSMUSG00000015342	698.983	-0.59556	0.144453	-4.12285	3.74212e-05	0.000554211
		ENSMUSG00000015355	242.861	0.577781	0.201535	2.8669	0.0041451	0.0209647
		ENSMUSG00000015396	538.886	0.744482	0.182082	4.08873	4.3375e-05	0.000620592
		ENSMUSG00000015467	55.4946	0.847534	0.298016	2.84392	0.00445619	0.0221508
		ENSMUSG00000015468	2950.14	0.243081	0.0833359	2.91688	0.00353554	0.0185902
		ENSMUSG00000015568	281842	-0.484617	0.0978909	-4.95058	7.39926e-07	2.5996e-05
		ENSMUSG00000015575	1783.92	0.326184	0.0929325	3.5099	0.00044828	0.00377437
		ENSMUSG00000015597	1097.92	-0.399998	0.0943398	-4.23998	2.23543e-05	0.000368962
		ENSMUSG00000015659	716.154	-0.708471	0.149944	-4.72492	2.30209e-06	6.15523e-05
		ENSMUSG00000015668	947.909	0.247117	0.096466	2.5617	0.0104162	0.0416217
		ENSMUSG00000015672	1486.88	0.263535	0.102928	2.56038	0.0104559	0.0417456
		ENSMUSG00000015697	1329.19	-0.286418	0.0839077	-3.41348	0.00064138	0.00498526
		ENSMUSG00000015711	2011.88	-0.260105	0.0689154	-3.77427	0.000160477	0.00169686
		ENSMUSG00000015721	19.2672	-2.38218	0.585537	-4.06836	4.73459e-05	0.000661061
		ENSMUSG00000015745	3404.61	0.306439	0.116031	2.64101	0.00826583	0.0350528
		ENSMUSG00000015749	4311.9	-0.293827	0.101221	-2.90283	0.00369806	0.0192142
		ENSMUSG00000015766	882.815	0.348754	0.133598	2.61047	0.00904191	0.0375298
		ENSMUSG00000015804	1930.5	0.34941	0.106649	3.27627	0.00105186	0.00735619
		ENSMUSG00000015843	4013.81	-0.241322	0.0865205	-2.7892	0.00528391	0.025109
		ENSMUSG00000015852	655.529	0.550142	0.175184	3.14037	0.00168733	0.0103684
		ENSMUSG00000015947	177.007	0.86812	0.245662	3.5338	0.000409638	0.00350409
		ENSMUSG00000015968	98.4241	-0.756554	0.212319	-3.5633	0.000366225	0.003225
		ENSMUSG00000015980	330.246	0.797651	0.292516	2.72687	0.0063939	0.0288215
		ENSMUSG00000016028	487.932	-0.493302	0.157991	-3.12234	0.0017942	0.0108909
		ENSMUSG00000016087	1126.87	0.553574	0.109451	5.05775	4.24237e-07	1.69052e-05
		ENSMUSG00000016181	565.045	-0.250538	0.100462	-2.49387	0.0126359	0.0482646
		ENSMUSG00000016194	1207.11	0.374686	0.13614	2.75222	0.00591932	0.0272338
		ENSMUSG00000016206	350.112	0.599953	0.173209	3.46375	0.00053271	0.00431743
		ENSMUSG00000016239	110.975	-1.18657	0.384679	-3.08458	0.00203841	0.0120694
		ENSMUSG00000016252	19717.9	0.327053	0.07755	4.21732	2.47226e-05	0.00039779
		ENSMUSG00000016256	1602.91	0.488028	0.135197	3.60975	0.00030649	0.00283102
		ENSMUSG00000016349	51950.5	-0.385533	0.0913364	-4.22102	2.43198e-05	0.000392181
		ENSMUSG00000016386	776.057	-0.301292	0.0968132	-3.1121	0.00185761	0.0112006
		ENSMUSG00000016409	793.902	-0.279054	0.0936155	-2.98085	0.00287447	0.0156785
		ENSMUSG00000016477	607.782	-0.305337	0.101632	-3.00433	0.00266167	0.0148257
		ENSMUSG00000016494	9434.9	0.625635	0.13	4.81256	1.49006e-06	4.5472e-05
		ENSMUSG00000016503	1048.36	0.335225	0.117081	2.8632	0.0041939	0.021167
		ENSMUSG00000016541	3851.98	-0.161434	0.0645891	-2.4994	0.0124404	0.0477068
		ENSMUSG00000016559	6557.07	0.460938	0.119577	3.85475	0.000115847	0.0013174
		ENSMUSG00000016664	15048	-0.492002	0.0809198	-6.08012	1.20093e-09	2.08626e-07
		ENSMUSG00000016833	1479.87	0.257308	0.102546	2.50919	0.0121009	0.0466926
		ENSMUSG00000017167	268	-0.551958	0.161275	-3.42247	0.000620556	0.00486786
		ENSMUSG00000017288	1190.22	-0.234139	0.0922479	-2.53815	0.0111442	0.0438401
		ENSMUSG00000017291	5805.76	-0.431191	0.115378	-3.73721	0.000186073	0.00191706
		ENSMUSG00000017309	6349.47	0.633166	0.147547	4.29127	1.77654e-05	0.000311109
		ENSMUSG00000017344	1784.99	0.52787	0.0933748	5.65324	1.57449e-08	1.49316e-06
		ENSMUSG00000017376	1189.3	-0.281894	0.0748077	-3.76824	0.000164401	0.00172699
		ENSMUSG00000017386	331.884	0.488537	0.14369	3.39994	0.000673999	0.00516935
		ENSMUSG00000017404	19051.6	0.327089	0.085898	3.80788	0.000140164	0.00152556
		ENSMUSG00000017417	423.21	0.490931	0.134437	3.65175	0.000260461	0.00249839
		ENSMUSG00000017446	996.569	0.560549	0.177284	3.16186	0.00156763	0.00981914
		ENSMUSG00000017453	23.0227	-1.30011	0.422088	-3.08018	0.00206875	0.012167
		ENSMUSG00000017485	4676.13	-0.209064	0.0751273	-2.7828	0.00538918	0.025377
		ENSMUSG00000017493	4302.18	0.430645	0.158447	2.71792	0.00656934	0.0294105
		ENSMUSG00000017548	1811.61	-0.291849	0.084385	-3.45854	0.000543117	0.00438404
		ENSMUSG00000017679	1127.09	-0.401621	0.136657	-2.93889	0.00329392	0.0175429
		ENSMUSG00000017686	4757.75	-0.303252	0.0878779	-3.45083	0.000558862	0.00447615
		ENSMUSG00000017692	780.111	-0.439629	0.097444	-4.51161	6.43374e-06	0.000140793
		ENSMUSG00000017697	53.1797	0.965729	0.372799	2.59048	0.00958412	0.039096
		ENSMUSG00000017707	25363.2	0.29308	0.0859218	3.411	0.00064724	0.00501195
		ENSMUSG00000017734	1107.84	0.398255	0.0980078	4.06351	4.83412e-05	0.000670427
		ENSMUSG00000017740	110.549	-0.70941	0.241698	-2.93511	0.00333432	0.0177254
		ENSMUSG00000017747	833.524	-0.317173	0.108748	-2.9166	0.00353874	0.0186002
		ENSMUSG00000017754	1989.95	0.528881	0.165344	3.19867	0.00138062	0.00898353
		ENSMUSG00000017756	11399.2	-0.478565	0.102266	-4.67959	2.87448e-06	7.39846e-05
		ENSMUSG00000017778	34576.2	0.39152	0.0818159	4.78538	1.70663e-06	5.0074e-05
		ENSMUSG00000017817	25967.8	-0.370827	0.09874	-3.7556	0.00017293	0.00180219
		ENSMUSG00000017843	6810.27	-0.158534	0.0580432	-2.73131	0.00630834	0.0285335
		ENSMUSG00000018008	729.128	0.473526	0.184105	2.57204	0.0101102	0.0406799
		ENSMUSG00000018042	5014.18	0.478238	0.09137	5.23408	1.6581e-07	8.5354e-06
		ENSMUSG00000018068	536.533	-0.32462	0.118023	-2.75049	0.00595065	0.0273344
		ENSMUSG00000018167	1228.43	0.389839	0.100399	3.88289	0.000103221	0.00120888
		ENSMUSG00000018169	721.19	0.620537	0.137809	4.50286	6.70439e-06	0.000144961
		ENSMUSG00000018381	568.308	0.514909	0.142321	3.61794	0.000296961	0.00276426
		ENSMUSG00000018401	1792.7	-0.644514	0.100966	-6.38346	1.73134e-10	4.03933e-08
		ENSMUSG00000018411	5471.02	-0.444301	0.108823	-4.0828	4.44971e-05	0.000632058
		ENSMUSG00000018427	1847.55	-1.02798	0.313771	-3.2762	0.00105214	0.00735619
		ENSMUSG00000018428	9192.25	-0.345202	0.0943114	-3.66023	0.000251985	0.00243322
		ENSMUSG00000018446	6141.89	-0.175173	0.0615422	-2.84639	0.00442175	0.0220023
		ENSMUSG00000018449	507.658	0.436671	0.140376	3.11072	0.00186634	0.0112439
		ENSMUSG00000018501	7690.49	-0.303594	0.0750385	-4.04584	5.21359e-05	0.000710118
		ENSMUSG00000018507	233.959	0.626081	0.177763	3.522	0.0004283	0.00363578
		ENSMUSG00000018509	739.473	0.317793	0.117395	2.70704	0.00678858	0.0301217
		ENSMUSG00000018547	2067.47	-0.241251	0.0747646	-3.22681	0.00125178	0.00832506
		ENSMUSG00000018548	855.375	0.348218	0.102357	3.402	0.000668941	0.005136
		ENSMUSG00000018567	11526.9	0.282982	0.0808688	3.49927	0.000466536	0.00389408
		ENSMUSG00000018572	892.181	0.396622	0.0920023	4.31101	1.62513e-05	0.000290934
		ENSMUSG00000018583	5970.79	-0.273833	0.0691086	-3.96236	7.42132e-05	0.000931852
		ENSMUSG00000018585	2068.34	0.575462	0.118754	4.84583	1.26085e-06	4.01721e-05
		ENSMUSG00000018593	24182.6	0.705599	0.168499	4.18755	2.81976e-05	0.000443777
		ENSMUSG00000018604	675.086	0.497381	0.129884	3.82941	0.000128449	0.00142267
		ENSMUSG00000018669	1287.55	0.223224	0.0820904	2.71924	0.00654314	0.0293205
		ENSMUSG00000018672	1501.48	0.3213	0.0809695	3.96816	7.24294e-05	0.000914216
		ENSMUSG00000018707	15047	-0.377592	0.106415	-3.5483	0.000387732	0.00336244
		ENSMUSG00000018727	22.9367	-1.28788	0.459245	-2.80434	0.00504198	0.02423
		ENSMUSG00000018752	507.722	0.656569	0.128784	5.09824	3.4283e-07	1.45854e-05
		ENSMUSG00000018761	605.963	0.327632	0.129158	2.53668	0.011191	0.0439884
		ENSMUSG00000018774	470.354	0.621458	0.197702	3.14341	0.00166994	0.0102878
		ENSMUSG00000018796	48754.5	-0.340867	0.0926281	-3.67996	0.000233274	0.00229887
		ENSMUSG00000018819	2246.45	0.464201	0.146336	3.17216	0.00151308	0.00959942
		ENSMUSG00000018830	1743.72	0.696837	0.199838	3.48701	0.000488452	0.0040305
		ENSMUSG00000018899	1708.61	0.727632	0.120144	6.05632	1.3927e-09	2.31556e-07
		ENSMUSG00000018906	2739.76	-0.520209	0.114062	-4.56076	5.09691e-06	0.000118341
		ENSMUSG00000018920	695.248	0.443759	0.160173	2.7705	0.00559697	0.0260826
		ENSMUSG00000018923	311.484	0.35292	0.141362	2.49657	0.0125402	0.0480387
		ENSMUSG00000018986	395.229	0.621247	0.15089	4.11723	3.83455e-05	0.00056426
		ENSMUSG00000018995	961.302	-0.313715	0.102715	-3.05423	0.0022564	0.0130242
		ENSMUSG00000019088	920.405	0.327154	0.118563	2.75932	0.00579222	0.0267853
		ENSMUSG00000019124	584.499	0.477657	0.148998	3.20579	0.00134691	0.00882387
		ENSMUSG00000019132	9781.21	-0.253254	0.0612395	-4.13547	3.54223e-05	0.000531519
		ENSMUSG00000019143	1742.14	-0.258938	0.0874415	-2.96127	0.00306376	0.0165363
		ENSMUSG00000019158	1709.97	0.36597	0.0936113	3.90946	9.25017e-05	0.00110856
		ENSMUSG00000019173	2992.57	0.469812	0.116297	4.03978	5.35019e-05	0.000728039
		ENSMUSG00000019194	807.674	-0.50791	0.150125	-3.38325	0.000716333	0.0054165
		ENSMUSG00000019254	4097.92	0.244293	0.0745512	3.27684	0.00104974	0.00735619
		ENSMUSG00000019256	616.354	0.52239	0.113155	4.61659	3.9009e-06	9.56381e-05
		ENSMUSG00000019302	4021.65	-0.599763	0.0889825	-6.74024	1.58125e-11	4.97234e-09
		ENSMUSG00000019362	4306.15	0.265499	0.0761577	3.48618	0.000489971	0.00403842
		ENSMUSG00000019370	7482.84	0.233951	0.0578038	4.04733	5.18042e-05	0.000708189
		ENSMUSG00000019428	6895.4	0.197493	0.0795889	2.48141	0.0130864	0.0495019
		ENSMUSG00000019505	40517.9	0.253725	0.087363	2.90427	0.00368114	0.0191539
		ENSMUSG00000019539	1153.83	0.569497	0.160363	3.5513	0.000383338	0.00334035
		ENSMUSG00000019558	11039.5	-0.458792	0.0793286	-5.78344	7.31904e-09	8.08168e-07
		ENSMUSG00000019578	3525.81	0.294096	0.0862458	3.40998	0.000649686	0.00501853
		ENSMUSG00000019579	1604.54	0.240148	0.0928218	2.58719	0.00967624	0.0394051
		ENSMUSG00000019647	1291.68	0.460991	0.096029	4.80053	1.58244e-06	4.74895e-05
		ENSMUSG00000019659	1976.03	0.388988	0.0889508	4.37307	1.22509e-05	0.000235026
		ENSMUSG00000019689	3072.64	0.239676	0.0673266	3.55989	0.000371006	0.00326039
		ENSMUSG00000019699	1910.47	0.404088	0.0848969	4.75975	1.93832e-06	5.49762e-05
		ENSMUSG00000019731	6385.07	-0.230723	0.0672771	-3.42944	0.000604836	0.00477303
		ENSMUSG00000019738	993.801	0.340649	0.113954	2.98935	0.00279569	0.0153123
		ENSMUSG00000019782	4172.07	0.276869	0.071415	3.8769	0.000105795	0.00123414
		ENSMUSG00000019796	253.235	-0.524414	0.186431	-2.81291	0.00490955	0.0237883
		ENSMUSG00000019818	8291.14	-0.205019	0.0707189	-2.89907	0.00374273	0.0193698
		ENSMUSG00000019828	1422.25	-0.72691	0.166289	-4.37136	1.23477e-05	0.000236256
		ENSMUSG00000019838	1144.05	-0.631776	0.119713	-5.27743	1.31009e-07	7.43152e-06
		ENSMUSG00000019850	324.136	0.553897	0.198503	2.79036	0.00526488	0.0250432
		ENSMUSG00000019853	55.8087	1.37281	0.330725	4.15093	3.3113e-05	0.000502564
		ENSMUSG00000019864	4073.68	-0.376204	0.107507	-3.49934	0.000466414	0.00389408
		ENSMUSG00000019866	508.603	0.375034	0.131337	2.8555	0.00429693	0.0215442
		ENSMUSG00000019868	1154.8	0.217774	0.0809284	2.69094	0.00712502	0.0312598
		ENSMUSG00000019872	5235.24	0.243604	0.0803555	3.03157	0.00243284	0.0137842
		ENSMUSG00000019874	31.6462	1.1918	0.407469	2.92488	0.00344593	0.0182183
		ENSMUSG00000019876	328.395	-0.543952	0.195764	-2.77861	0.00545914	0.0256468
		ENSMUSG00000019899	8107.81	-0.208637	0.0840056	-2.48361	0.0130057	0.0492719
		ENSMUSG00000019907	2245.29	-0.433796	0.106584	-4.06999	4.70146e-05	0.000657775
		ENSMUSG00000019927	1985.42	-0.244562	0.0683446	-3.57837	0.000345739	0.0030781
		ENSMUSG00000019929	37956.8	0.426478	0.088339	4.82774	1.38094e-06	4.30503e-05
		ENSMUSG00000019942	86.8125	0.820664	0.298285	2.75128	0.00593636	0.0272861
		ENSMUSG00000019944	5948.49	-0.381271	0.0987853	-3.85959	0.000113577	0.00129854
		ENSMUSG00000019947	1089.77	-0.411654	0.128588	-3.20134	0.00136788	0.0089168
		ENSMUSG00000019951	1573.4	-0.4335	0.094554	-4.58468	4.54677e-06	0.000108351
		ENSMUSG00000019960	1259.4	0.434583	0.147306	2.95021	0.00317557	0.0170444
		ENSMUSG00000019970	4178.82	0.43238	0.134588	3.21261	0.00131533	0.00865616
		ENSMUSG00000019978	3060.85	0.400126	0.082823	4.8311	1.35781e-06	4.25123e-05
		ENSMUSG00000019989	315.816	0.829803	0.168333	4.92954	8.24246e-07	2.82529e-05
		ENSMUSG00000019996	1087.91	-0.301865	0.105368	-2.86487	0.00417183	0.0210777
		ENSMUSG00000019997	4008.56	-0.380523	0.139877	-2.72041	0.00652009	0.0292535
		ENSMUSG00000020009	3498.05	0.386022	0.103328	3.7359	0.000187045	0.00192296
		ENSMUSG00000020022	16093.9	0.315439	0.0700529	4.50287	6.70424e-06	0.000144961
		ENSMUSG00000020032	2079.1	-0.45788	0.151912	-3.01412	0.00257729	0.0144219
		ENSMUSG00000020038	668.684	-0.64792	0.231415	-2.79983	0.00511302	0.0245225
		ENSMUSG00000020042	146.262	-0.652713	0.193858	-3.36697	0.000760002	0.00567317
		ENSMUSG00000020056	1208.33	0.248973	0.0992532	2.50847	0.0121256	0.046738
		ENSMUSG00000020067	7017.77	-0.665219	0.127245	-5.22787	1.71475e-07	8.73376e-06
		ENSMUSG00000020077	2143.58	0.745733	0.128221	5.81601	6.02672e-09	6.97411e-07
		ENSMUSG00000020079	2068.65	-0.282098	0.071316	-3.95561	7.6341e-05	0.000950147
		ENSMUSG00000020086	334.334	0.622481	0.160897	3.86883	0.00010936	0.00126197
		ENSMUSG00000020090	123.568	-0.653845	0.250621	-2.6089	0.00908329	0.0376542
		ENSMUSG00000020092	1700.48	0.485924	0.110499	4.39756	1.09477e-05	0.000215454
		ENSMUSG00000020099	1709.92	0.391199	0.113325	3.45201	0.000556432	0.00446199
		ENSMUSG00000020101	2054.23	0.797546	0.137707	5.79163	6.97077e-09	7.80779e-07
		ENSMUSG00000020102	827.733	0.915719	0.15151	6.04397	1.50371e-09	2.4168e-07
		ENSMUSG00000020105	131.183	0.660201	0.250745	2.63296	0.00846444	0.0356533
		ENSMUSG00000020114	1830.51	-0.219732	0.0759415	-2.89344	0.00381042	0.0196638
		ENSMUSG00000020120	404.927	0.698777	0.195099	3.58165	0.000341434	0.00306
		ENSMUSG00000020132	3245.09	-0.308618	0.0672483	-4.58923	4.44883e-06	0.000106544
		ENSMUSG00000020137	531.379	-0.528644	0.111371	-4.74667	2.06788e-06	5.7193e-05
		ENSMUSG00000020156	1365.25	0.320696	0.101087	3.17248	0.00151143	0.00959941
		ENSMUSG00000020160	1099.89	-0.406422	0.107616	-3.77658	0.000158994	0.0016863
		ENSMUSG00000020163	25049.2	0.210789	0.0809751	2.60313	0.00923771	0.0380585
		ENSMUSG00000020167	1378.82	0.377172	0.105791	3.56526	0.00036349	0.00320644
		ENSMUSG00000020169	214.914	-1.09207	0.254689	-4.28787	1.80396e-05	0.000315529
		ENSMUSG00000020170	1568.44	-0.382594	0.107	-3.57564	0.000349368	0.00310418
		ENSMUSG00000020176	5598.01	-0.298097	0.109019	-2.73437	0.00625003	0.0283659
		ENSMUSG00000020178	647.643	0.803879	0.12873	6.24468	4.24681e-10	8.19067e-08
		ENSMUSG00000020184	2991.76	-0.324697	0.0612988	-5.29696	1.17744e-07	6.78552e-06
		ENSMUSG00000020186	492.232	0.656022	0.160395	4.09004	4.31304e-05	0.000618338
		ENSMUSG00000020189	6161.57	-0.504355	0.111224	-4.5346	5.7712e-06	0.000128629
		ENSMUSG00000020198	4176.13	-0.25642	0.0794807	-3.22619	0.00125449	0.00833924
		ENSMUSG00000020211	792.642	-0.286415	0.106423	-2.69129	0.0071176	0.0312556
		ENSMUSG00000020219	2572.64	0.191477	0.0730648	2.62065	0.00877619	0.0366477
		ENSMUSG00000020220	7681.57	-0.451475	0.121422	-3.71822	0.00020063	0.002038
		ENSMUSG00000020224	734.918	0.437139	0.0981655	4.45308	8.46475e-06	0.000173924
		ENSMUSG00000020227	350.553	0.523137	0.181507	2.88219	0.00394924	0.0202144
		ENSMUSG00000020250	3262.76	-0.226173	0.0846683	-2.67129	0.0075561	0.0326563
		ENSMUSG00000020253	519.146	0.568227	0.137762	4.1247	3.71224e-05	0.00055131
		ENSMUSG00000020255	23495	-0.599125	0.110362	-5.42874	5.67538e-08	3.87237e-06
		ENSMUSG00000020261	821.846	-0.310117	0.0958782	-3.23449	0.00121861	0.00816829
		ENSMUSG00000020263	4389.55	-0.426897	0.108992	-3.91677	8.97451e-05	0.00108
		ENSMUSG00000020264	1350.14	-0.418794	0.13932	-3.00599	0.00264722	0.0147618
		ENSMUSG00000020271	3508.2	-0.178717	0.0623484	-2.86642	0.00415139	0.0209891
		ENSMUSG00000020272	998.972	0.364359	0.136123	2.67669	0.00743537	0.0323078
		ENSMUSG00000020290	3260.03	-0.29567	0.10968	-2.69576	0.00702283	0.0309146
		ENSMUSG00000020300	4245.94	-0.761071	0.100377	-7.58211	3.39992e-14	3.78307e-11
		ENSMUSG00000020305	618.585	0.284649	0.109513	2.59922	0.0093436	0.0383942
		ENSMUSG00000020308	566.562	0.364809	0.121642	2.99903	0.00270836	0.0150159
		ENSMUSG00000020311	2716.32	-0.232509	0.0715366	-3.25021	0.0011532	0.00783885
		ENSMUSG00000020326	54804.2	-0.232821	0.0869346	-2.67811	0.00740382	0.0322094
		ENSMUSG00000020329	1632.05	-0.336408	0.0896281	-3.75337	0.000174471	0.00181433
		ENSMUSG00000020331	1081.62	-0.709866	0.194675	-3.64642	0.000265918	0.00253393
		ENSMUSG00000020333	800.69	-1.03958	0.150482	-6.90831	4.90455e-12	2.28853e-09
		ENSMUSG00000020334	261.707	-0.570604	0.17493	-3.26191	0.00110665	0.00765185
		ENSMUSG00000020340	9808.83	-0.499855	0.132358	-3.77655	0.000159014	0.0016863
		ENSMUSG00000020354	1896.71	-0.420215	0.146285	-2.87257	0.00407143	0.0207006
		ENSMUSG00000020361	9722.7	-0.414061	0.101049	-4.09762	4.17422e-05	0.000603198
		ENSMUSG00000020366	3004.75	-0.186476	0.0596186	-3.12781	0.00176112	0.0107307
		ENSMUSG00000020372	21840.1	0.378631	0.0869088	4.35665	1.3207e-05	0.000250051
		ENSMUSG00000020374	28.4401	1.16083	0.455174	2.5503	0.0107631	0.0426775
		ENSMUSG00000020376	2616.03	0.333944	0.0980699	3.40517	0.000661232	0.00509498
		ENSMUSG00000020377	155.639	0.848813	0.293602	2.89103	0.00383977	0.01978
		ENSMUSG00000020381	95.5236	0.690696	0.254161	2.71756	0.00657659	0.0294157
		ENSMUSG00000020393	9635.46	-0.412463	0.0798506	-5.16544	2.39879e-07	1.09625e-05
		ENSMUSG00000020395	458.432	0.487267	0.137023	3.5561	0.000376401	0.00329578
		ENSMUSG00000020427	1497.52	0.526239	0.154295	3.4106	0.000648211	0.00501678
		ENSMUSG00000020431	301.541	-1.35723	0.226994	-5.97914	2.24325e-09	3.34522e-07
		ENSMUSG00000020435	1270.9	-0.43407	0.133519	-3.25099	0.00115003	0.00783199
		ENSMUSG00000020439	8070.81	-0.359628	0.0856629	-4.19817	2.69076e-05	0.000428655
		ENSMUSG00000020456	117067	-0.428735	0.111016	-3.86191	0.000112506	0.00129056
		ENSMUSG00000020459	3005.87	-0.330818	0.117095	-2.82521	0.00472496	0.0231526
		ENSMUSG00000020460	12969.8	0.470132	0.107068	4.39096	1.12851e-05	0.000220892
		ENSMUSG00000020467	484.687	0.624001	0.22591	2.76216	0.005742	0.0266041
		ENSMUSG00000020475	25471.2	-0.205331	0.0685502	-2.99534	0.00274138	0.0151294
		ENSMUSG00000020477	3422.35	0.412029	0.0940834	4.3794	1.19004e-05	0.00022952
		ENSMUSG00000020485	1168.73	0.37738	0.105459	3.57846	0.000345627	0.0030781
		ENSMUSG00000020486	2062.16	0.407421	0.097442	4.18116	2.90022e-05	0.000453042
		ENSMUSG00000020519	1239.61	0.304138	0.0778831	3.90506	9.42032e-05	0.00112003
		ENSMUSG00000020520	1030.28	0.356248	0.129201	2.75732	0.00582773	0.0269237
		ENSMUSG00000020527	336.388	-0.42661	0.147277	-2.89665	0.00377169	0.0194918
		ENSMUSG00000020532	877.907	-0.38531	0.118542	-3.25041	0.00115238	0.00783691
		ENSMUSG00000020542	2670.3	-0.750083	0.119067	-6.29969	2.98242e-10	6.27031e-08
		ENSMUSG00000020546	415.309	-0.34687	0.136119	-2.54828	0.0108254	0.0428426
		ENSMUSG00000020561	573.962	0.260642	0.101173	2.5762	0.00998937	0.0403846
		ENSMUSG00000020564	1027.09	-0.246345	0.0936345	-2.63092	0.00851533	0.0357961
		ENSMUSG00000020573	214.155	0.473037	0.153475	3.08218	0.00205494	0.0121372
		ENSMUSG00000020577	3418.41	0.459656	0.101943	4.50897	6.51423e-06	0.000142243
		ENSMUSG00000020580	8209.89	-0.421463	0.0909644	-4.63328	3.59923e-06	8.91488e-05
		ENSMUSG00000020589	841.325	0.301173	0.0951128	3.16648	0.00154297	0.00970814
		ENSMUSG00000020590	5437.45	-0.28854	0.0929502	-3.10424	0.0019077	0.0114645
		ENSMUSG00000020593	10526.6	-0.588549	0.101799	-5.78151	7.40338e-09	8.1019e-07
		ENSMUSG00000020612	27454.5	-0.332236	0.104129	-3.19063	0.00141962	0.00917963
		ENSMUSG00000020628	1582.63	-0.251648	0.0694341	-3.62428	0.000289768	0.00270419
		ENSMUSG00000020629	2470.56	-0.260547	0.0814613	-3.19842	0.00138184	0.00898353
		ENSMUSG00000020638	822.079	0.585299	0.134625	4.34763	1.37617e-05	0.000257853
		ENSMUSG00000020639	90.0934	-0.790687	0.25874	-3.05591	0.00224379	0.012967
		ENSMUSG00000020641	1916.97	0.593752	0.173419	3.4238	0.000617522	0.00484932
		ENSMUSG00000020642	1720.03	0.667901	0.120976	5.52093	3.37202e-08	2.60835e-06
		ENSMUSG00000020644	381.423	0.465436	0.185644	2.50714	0.0121713	0.0468614
		ENSMUSG00000020646	317.404	-0.425967	0.12658	-3.3652	0.000764878	0.00570601
		ENSMUSG00000020647	1998.15	-0.502779	0.105405	-4.77	1.84227e-06	5.27691e-05
		ENSMUSG00000020661	3022.51	-0.317116	0.11006	-2.88131	0.0039603	0.0202522
		ENSMUSG00000020671	7808.83	-0.351511	0.0611682	-5.74664	9.10342e-09	9.61175e-07
		ENSMUSG00000020674	5080.3	0.436171	0.101933	4.279	1.87735e-05	0.000323283
		ENSMUSG00000020676	140.43	1.22756	0.376862	3.25733	0.00112466	0.00771373
		ENSMUSG00000020677	1177.95	0.223789	0.0879824	2.54357	0.0109726	0.0432602
		ENSMUSG00000020696	397.08	0.330302	0.124135	2.66083	0.0077949	0.0334282
		ENSMUSG00000020716	2007.33	-0.548501	0.113855	-4.81754	1.45337e-06	4.46348e-05
		ENSMUSG00000020717	11761.3	0.457075	0.0818952	5.58122	2.38833e-08	1.98547e-06
		ENSMUSG00000020721	1897.63	-0.514655	0.108669	-4.736	2.17977e-06	5.93228e-05
		ENSMUSG00000020733	287.449	0.611106	0.16861	3.62437	0.00028967	0.00270419
		ENSMUSG00000020736	338.3	0.689444	0.159967	4.30993	1.6331e-05	0.000291639
		ENSMUSG00000020737	3289.18	0.226597	0.0838449	2.70257	0.00688053	0.0304425
		ENSMUSG00000020738	5799.34	0.245397	0.0912131	2.69037	0.00713726	0.031266
		ENSMUSG00000020741	16002.6	-0.444136	0.0810504	-5.47975	4.25933e-08	3.11168e-06
		ENSMUSG00000020745	12861.2	-0.323123	0.091362	-3.53673	0.000405113	0.00348185
		ENSMUSG00000020747	5916.09	-0.248928	0.0932488	-2.6695	0.00759639	0.0327886
		ENSMUSG00000020773	1245.35	0.500228	0.163039	3.06815	0.0021539	0.0125407
		ENSMUSG00000020777	17086.2	-0.407702	0.0920404	-4.42961	9.44057e-06	0.000190723
		ENSMUSG00000020794	4185.22	-0.358352	0.0889975	-4.02654	5.66027e-05	0.00076448
		ENSMUSG00000020801	548.412	0.312063	0.119714	2.60673	0.00914107	0.0377895
		ENSMUSG00000020803	2570.51	0.258915	0.091416	2.83227	0.00462192	0.0227623
		ENSMUSG00000020811	549.267	0.713211	0.136124	5.23943	1.61073e-07	8.41124e-06
		ENSMUSG00000020814	1115.15	0.381564	0.149228	2.55691	0.0105606	0.0420591
		ENSMUSG00000020818	1467.26	-0.271349	0.0890973	-3.04554	0.00232263	0.0132742
		ENSMUSG00000020821	39559.5	-0.206028	0.072226	-2.85255	0.00433701	0.0216775
		ENSMUSG00000020826	856.808	0.487063	0.137659	3.53818	0.000402902	0.00347035
		ENSMUSG00000020831	697.086	0.451001	0.106027	4.25364	2.10322e-05	0.000350901
		ENSMUSG00000020836	17551.2	-0.531656	0.0789775	-6.73175	1.67638e-11	5.15933e-09
		ENSMUSG00000020839	26.5324	1.50547	0.518792	2.90188	0.00370925	0.0192517
		ENSMUSG00000020844	810.056	0.750166	0.127068	5.90367	3.55504e-09	4.99259e-07
		ENSMUSG00000020846	3829.3	0.529855	0.110981	4.77428	1.80351e-06	5.20715e-05
		ENSMUSG00000020849	13476.2	-0.149735	0.0467785	-3.20093	0.00136987	0.00892017
		ENSMUSG00000020857	29234.8	0.203169	0.0672956	3.01905	0.00253565	0.014255
		ENSMUSG00000020859	13276.2	-0.29488	0.0992735	-2.97038	0.00297436	0.0161159
		ENSMUSG00000020869	2135.3	0.21265	0.0853003	2.49296	0.0126682	0.0483753
		ENSMUSG00000020902	4486.14	-0.414543	0.105688	-3.92234	8.76917e-05	0.00106059
		ENSMUSG00000020910	537.483	0.364655	0.132142	2.75958	0.00578762	0.0267812
		ENSMUSG00000020918	1192.95	-0.211797	0.0854203	-2.47947	0.0131578	0.0496549
		ENSMUSG00000020919	4124.46	-0.221065	0.0707183	-3.126	0.00177204	0.0107745
		ENSMUSG00000020926	714.237	-0.862463	0.163275	-5.28226	1.27599e-07	7.26662e-06
		ENSMUSG00000020928	603.181	0.388485	0.122347	3.17528	0.00149691	0.00953451
		ENSMUSG00000020935	2246.41	-0.286446	0.100492	-2.85044	0.00436593	0.0217845
		ENSMUSG00000020937	822.911	-0.483318	0.143402	-3.37038	0.000750639	0.00562255
		ENSMUSG00000020964	4441.07	-0.494785	0.0722288	-6.85025	7.37217e-12	3.23147e-09
		ENSMUSG00000020974	52.3101	0.939537	0.317739	2.95695	0.00310701	0.0167385
		ENSMUSG00000021000	3915.97	-0.316322	0.0661742	-4.78015	1.75168e-06	5.08796e-05
		ENSMUSG00000021009	1849.12	-0.564778	0.114558	-4.93005	8.2207e-07	2.82452e-05
		ENSMUSG00000021027	5917.43	-0.462175	0.122963	-3.75864	0.000170837	0.00178552
		ENSMUSG00000021036	1449.14	0.255203	0.102531	2.48904	0.012809	0.0486942
		ENSMUSG00000021040	2027.23	0.42324	0.0943342	4.4866	7.23673e-06	0.00015215
		ENSMUSG00000021044	2105.12	-0.312845	0.111481	-2.80625	0.00501212	0.0241507
		ENSMUSG00000021051	2336.82	-0.322549	0.0783627	-4.1161	3.85331e-05	0.000565295
		ENSMUSG00000021057	325.034	0.497651	0.193334	2.57404	0.0100517	0.0405236
		ENSMUSG00000021061	8970.03	-0.590671	0.122846	-4.80821	1.52287e-06	4.6278e-05
		ENSMUSG00000021091	379.626	-0.909138	0.278336	-3.26634	0.00108948	0.00755204
		ENSMUSG00000021094	1543.26	0.354259	0.097084	3.64899	0.000263273	0.00251369
		ENSMUSG00000021108	1422.97	0.504036	0.137961	3.65348	0.00025871	0.00248654
		ENSMUSG00000021109	4261.42	-0.431563	0.100696	-4.28578	1.82098e-05	0.000318121
		ENSMUSG00000021124	4795.54	0.279445	0.0657836	4.24795	2.15739e-05	0.000358286
		ENSMUSG00000021131	1617.73	0.268357	0.0826799	3.24573	0.00117148	0.00792215
		ENSMUSG00000021133	7210.37	-0.317042	0.0835823	-3.79317	0.000148739	0.00159958
		ENSMUSG00000021134	8902.56	0.448851	0.113295	3.9618	7.43859e-05	0.00093321
		ENSMUSG00000021143	4252.25	-0.326127	0.0965084	-3.37926	0.000726809	0.0054871
		ENSMUSG00000021147	2117.49	-0.288465	0.0848658	-3.39907	0.000676144	0.00517483
		ENSMUSG00000021156	6655.18	-0.144878	0.0547296	-2.64716	0.00811719	0.0345855
		ENSMUSG00000021188	3690.82	-0.804887	0.122024	-6.59611	4.22077e-11	1.15195e-08
		ENSMUSG00000021196	3189.91	-0.376904	0.118892	-3.17014	0.00152367	0.00963706
		ENSMUSG00000021200	25378.3	-0.51137	0.115576	-4.42453	9.66542e-06	0.000193912
		ENSMUSG00000021221	502.568	-0.657061	0.129166	-5.08694	3.63883e-07	1.50503e-05
		ENSMUSG00000021234	621.5	-0.515111	0.112991	-4.55887	5.14288e-06	0.000118647
		ENSMUSG00000021242	3656.96	0.362717	0.0868268	4.17748	2.94759e-05	0.000458007
		ENSMUSG00000021243	936.007	0.327492	0.101783	3.21755	0.00129289	0.00854349
		ENSMUSG00000021244	1706.63	-0.460677	0.0925642	-4.97683	6.46327e-07	2.33728e-05
		ENSMUSG00000021245	908.444	-0.24964	0.0942319	-2.64921	0.00806807	0.0344262
		ENSMUSG00000021255	1774.6	-0.334818	0.0969156	-3.45474	0.000550821	0.00442892
		ENSMUSG00000021256	817.443	0.40837	0.133348	3.06244	0.00219543	0.0127384
		ENSMUSG00000021258	1471.89	-0.272552	0.0847336	-3.21658	0.0012973	0.00856086
		ENSMUSG00000021271	669.135	-0.332972	0.104989	-3.17149	0.0015166	0.00961332
		ENSMUSG00000021275	870.926	-0.321269	0.122207	-2.6289	0.00856621	0.0359577
		ENSMUSG00000021282	9996.88	-0.193017	0.0753812	-2.56054	0.0104509	0.0417372
		ENSMUSG00000021290	14669.9	0.41316	0.0871116	4.74289	2.10695e-06	5.79411e-05
		ENSMUSG00000021294	1580.12	0.455023	0.125822	3.6164	0.000298732	0.00277888
		ENSMUSG00000021306	1061.46	0.42229	0.101319	4.16791	3.074e-05	0.000471344
		ENSMUSG00000021313	92726	-0.446802	0.168786	-2.64715	0.00811738	0.0345855
		ENSMUSG00000021327	3995.43	-0.403877	0.132221	-3.05456	0.00225393	0.0130152
		ENSMUSG00000021339	1495.14	-0.350169	0.0974826	-3.59212	0.000327997	0.00296642
		ENSMUSG00000021340	996.679	-0.44159	0.0970809	-4.54868	5.39836e-06	0.000122394
		ENSMUSG00000021371	4699.59	-0.306074	0.0567648	-5.39197	6.96907e-08	4.58714e-06
		ENSMUSG00000021375	8068.16	-0.42903	0.0763604	-5.61848	1.92644e-08	1.70957e-06
		ENSMUSG00000021390	8164.43	0.267012	0.0667449	4.00049	6.32124e-05	0.000833516
		ENSMUSG00000021408	844.045	0.389421	0.114817	3.39166	0.000694696	0.00528745
		ENSMUSG00000021411	640.222	0.588175	0.129092	4.55623	5.20797e-06	0.000119494
		ENSMUSG00000021423	346.632	0.644444	0.182728	3.52679	0.000420635	0.00358544
		ENSMUSG00000021451	1551.18	-0.251322	0.0727813	-3.45311	0.000554163	0.00445085
		ENSMUSG00000021474	589.213	0.552029	0.135896	4.06214	4.86253e-05	0.000672434
		ENSMUSG00000021481	1890.83	-0.377234	0.100188	-3.76526	0.000166379	0.00174396
		ENSMUSG00000021486	1913.22	0.367706	0.119849	3.06808	0.00215443	0.0125407
		ENSMUSG00000021494	822.469	0.298053	0.0918287	3.24575	0.00117143	0.00792215
		ENSMUSG00000021514	553.06	-0.38389	0.124556	-3.08206	0.00205573	0.0121372
		ENSMUSG00000021537	1800.98	0.301317	0.100852	2.98771	0.00281075	0.0153773
		ENSMUSG00000021550	3364.41	-0.34885	0.0934902	-3.73141	0.00019041	0.00194787
		ENSMUSG00000021559	2799.56	-0.338575	0.0994074	-3.40593	0.000659384	0.00508421
		ENSMUSG00000021575	251.534	-0.847698	0.220894	-3.83757	0.000124255	0.00138685
		ENSMUSG00000021578	2497.68	-0.232571	0.081038	-2.8699	0.00410604	0.0208292
		ENSMUSG00000021579	7116.24	-0.344946	0.108879	-3.16816	0.00153406	0.00967734
		ENSMUSG00000021585	7756.16	-0.223886	0.0890613	-2.51384	0.0119423	0.0463001
		ENSMUSG00000021604	1390.56	-0.292963	0.116701	-2.51037	0.0120605	0.0466085
		ENSMUSG00000021608	684.916	0.302423	0.106791	2.83193	0.00462682	0.022772
		ENSMUSG00000021643	199.541	0.693173	0.225986	3.06733	0.00215979	0.0125669
		ENSMUSG00000021660	7134.38	0.222096	0.0720871	3.08094	0.00206346	0.012163
		ENSMUSG00000021666	4182.05	-0.455544	0.0877934	-5.18882	2.11627e-07	1.00039e-05
		ENSMUSG00000021669	3064.02	-0.301065	0.0825062	-3.649	0.000263261	0.00251369
		ENSMUSG00000021687	2285.71	-0.209757	0.0747765	-2.80512	0.00502983	0.0241957
		ENSMUSG00000021690	3436.24	-0.547617	0.0808745	-6.77119	1.27728e-11	4.38797e-09
		ENSMUSG00000021701	1929.36	0.549245	0.113642	4.83312	1.3441e-06	4.21745e-05
		ENSMUSG00000021704	1086.04	-0.523474	0.133878	-3.91008	9.22673e-05	0.00110667
		ENSMUSG00000021706	1387.8	-0.358397	0.130875	-2.73847	0.00617265	0.028122
		ENSMUSG00000021708	640.607	0.393494	0.15597	2.52288	0.0116397	0.045358
		ENSMUSG00000021710	906.623	-0.319383	0.11828	-2.70022	0.00692934	0.0305995
		ENSMUSG00000021730	75.6416	1.07952	0.33839	3.19016	0.00142192	0.00918629
		ENSMUSG00000021733	1055.49	-0.490796	0.0964407	-5.0891	3.5977e-07	1.49542e-05
		ENSMUSG00000021738	1672.48	-0.303673	0.0854173	-3.55517	0.00037774	0.00330294
		ENSMUSG00000021756	10556.8	-0.163173	0.0626571	-2.60422	0.0092083	0.0379733
		ENSMUSG00000021760	1378.62	0.348334	0.109568	3.17916	0.00147703	0.00943278
		ENSMUSG00000021763	160.594	-0.859317	0.177903	-4.83027	1.36351e-06	4.25985e-05
		ENSMUSG00000021764	14749.4	0.195443	0.0785864	2.48697	0.0128834	0.0489131
		ENSMUSG00000021770	1281.85	-0.355521	0.100826	-3.5261	0.000421731	0.00359055
		ENSMUSG00000021779	1165.95	-0.544869	0.152221	-3.57946	0.000344311	0.0030781
		ENSMUSG00000021786	1713.92	-0.307407	0.107777	-2.85225	0.00434112	0.0216862
		ENSMUSG00000021794	8648.13	-0.247819	0.0678352	-3.65325	0.000258943	0.00248713
		ENSMUSG00000021796	5195.38	-0.359085	0.121402	-2.95782	0.00309827	0.0166976
		ENSMUSG00000021798	52218.5	-0.366286	0.0911824	-4.01707	5.89251e-05	0.000788484
		ENSMUSG00000021809	1500.04	-0.268595	0.0848285	-3.16633	0.00154378	0.00970903
		ENSMUSG00000021810	1831.18	-0.251229	0.0741604	-3.38764	0.000704964	0.0053473
		ENSMUSG00000021816	4098.4	-0.337346	0.0643997	-5.23832	1.62043e-07	8.43149e-06
		ENSMUSG00000021820	3014.65	-0.369754	0.0850231	-4.34886	1.36845e-05	0.000257408
		ENSMUSG00000021822	366.046	0.674919	0.150851	4.47407	7.67442e-06	0.000160652
		ENSMUSG00000021823	8379.4	-0.478256	0.116646	-4.10008	4.13011e-05	0.00059742
		ENSMUSG00000021838	3877.11	-0.622955	0.085169	-7.31434	2.58647e-13	2.20078e-10
		ENSMUSG00000021843	15169.7	-0.395339	0.12131	-3.2589	0.00111844	0.00769291
		ENSMUSG00000021866	4078.36	-0.257823	0.0765567	-3.36774	0.000757872	0.00566251
		ENSMUSG00000021870	11718.5	-0.443623	0.172115	-2.57748	0.00995222	0.0402682
		ENSMUSG00000021871	1420.96	0.551569	0.130877	4.21442	2.50424e-05	0.000401594
		ENSMUSG00000021876	3778.37	0.544386	0.118537	4.59253	4.37902e-06	0.000105046
		ENSMUSG00000021895	2451.57	0.368269	0.0895113	4.11422	3.8849e-05	0.000569352
		ENSMUSG00000021904	1767.84	0.357614	0.107464	3.32776	0.000875479	0.00634141
		ENSMUSG00000021905	2481.33	0.205359	0.0809896	2.53562	0.0112247	0.0440731
		ENSMUSG00000021906	3956.79	-0.330704	0.0968648	-3.41408	0.000639973	0.00497967
		ENSMUSG00000021910	9358.25	-0.287732	0.077901	-3.69356	0.000221134	0.00220905
		ENSMUSG00000021913	10595.3	-0.750665	0.131884	-5.69187	1.25652e-08	1.22808e-06
		ENSMUSG00000021929	4876.04	-0.276734	0.103048	-2.68548	0.00724259	0.0316412
		ENSMUSG00000021944	5051.74	-0.324102	0.0852865	-3.80015	0.000144609	0.00156453
		ENSMUSG00000021947	267.891	0.663169	0.159522	4.15722	3.2214e-05	0.000491535
		ENSMUSG00000021957	1393.05	0.505657	0.101321	4.99066	6.01725e-07	2.22607e-05
		ENSMUSG00000021978	3742.29	-0.379615	0.0785342	-4.83375	1.33982e-06	4.21316e-05
		ENSMUSG00000021981	1373.63	0.214465	0.0848365	2.52798	0.0114722	0.044826
		ENSMUSG00000021983	357.694	-0.645147	0.180185	-3.58047	0.000342978	0.00306814
		ENSMUSG00000021990	1037.05	0.322359	0.0865604	3.7241	0.000196017	0.00199394
		ENSMUSG00000021996	5016.22	0.223253	0.0646316	3.45424	0.000551853	0.00443475
		ENSMUSG00000022000	1529.67	-0.304419	0.0876985	-3.4712	0.000518141	0.00423202
		ENSMUSG00000022003	428.76	0.372581	0.137741	2.70495	0.00683143	0.0302747
		ENSMUSG00000022014	125.712	0.679607	0.252644	2.68998	0.00714559	0.0312836
		ENSMUSG00000022016	3144.9	-0.359084	0.0972574	-3.6921	0.000222407	0.00222024
		ENSMUSG00000022018	1607.1	0.465584	0.171599	2.71321	0.00666358	0.0297005
		ENSMUSG00000022040	15635.2	-0.307678	0.0930969	-3.30492	0.000950025	0.00676285
		ENSMUSG00000022043	5530.93	-0.177939	0.0650816	-2.73409	0.00625534	0.0283659
		ENSMUSG00000022052	2565	-0.255145	0.0733277	-3.47952	0.000502316	0.00412841
		ENSMUSG00000022075	1368.33	-0.304864	0.0898921	-3.39145	0.000695246	0.00528745
		ENSMUSG00000022089	459.661	0.44208	0.124875	3.54018	0.000399859	0.00345317
		ENSMUSG00000022090	401.822	0.609288	0.201354	3.02595	0.00247851	0.0139936
		ENSMUSG00000022094	3364.4	-0.480471	0.11694	-4.10868	3.97927e-05	0.000581415
		ENSMUSG00000022100	3456.81	-0.298239	0.0714081	-4.17655	2.95969e-05	0.000458371
		ENSMUSG00000022105	1499.36	-0.315618	0.0916364	-3.44425	0.000572655	0.00456158
		ENSMUSG00000022106	1721.66	0.192675	0.0755636	2.54984	0.0107774	0.0427226
		ENSMUSG00000022119	1558.43	-0.407025	0.0868666	-4.68563	2.79099e-06	7.24806e-05
		ENSMUSG00000022122	1320.02	0.417916	0.124239	3.36381	0.00076874	0.00572953
		ENSMUSG00000022125	1674.56	-0.179819	0.0708509	-2.53799	0.0111492	0.043848
		ENSMUSG00000022136	4161.18	-0.402907	0.133538	-3.01718	0.00255134	0.0143265
		ENSMUSG00000022139	9303.95	-0.327907	0.101643	-3.22606	0.00125507	0.00833924
		ENSMUSG00000022141	3713.09	-0.313916	0.103257	-3.04013	0.00236473	0.0134778
		ENSMUSG00000022150	2288.94	0.342072	0.123895	2.76099	0.00576272	0.0266745
		ENSMUSG00000022174	2969.57	0.308435	0.0800582	3.85263	0.000116856	0.00132575
		ENSMUSG00000022185	4330.06	-0.237484	0.0647361	-3.66849	0.000243986	0.00237382
		ENSMUSG00000022191	2731.05	-0.173866	0.0671533	-2.58909	0.00962308	0.0392328
		ENSMUSG00000022195	1046.9	-0.285685	0.0865844	-3.2995	0.000968589	0.00687918
		ENSMUSG00000022204	1165.94	0.26474	0.087094	3.03971	0.00236807	0.0134912
		ENSMUSG00000022205	2615.91	0.265512	0.0789798	3.36177	0.000774436	0.00575358
		ENSMUSG00000022210	4833.3	-0.254266	0.0973179	-2.61273	0.00898214	0.0373245
		ENSMUSG00000022215	5147.1	0.401797	0.0720456	5.57697	2.44737e-08	2.01143e-06
		ENSMUSG00000022219	245.382	-0.530639	0.208586	-2.54398	0.0109597	0.0432322
		ENSMUSG00000022221	208.238	0.559038	0.188908	2.95932	0.0030832	0.016635
		ENSMUSG00000022237	2361.39	-0.532164	0.149625	-3.55666	0.000375598	0.00329075
		ENSMUSG00000022255	3863.23	-0.235577	0.0860745	-2.7369	0.00620215	0.0281904
		ENSMUSG00000022261	2648.14	0.231847	0.0706133	3.28334	0.00102585	0.00721389
		ENSMUSG00000022263	3035.5	-0.2987	0.109028	-2.73966	0.00615023	0.0280714
		ENSMUSG00000022270	16427.6	-0.322468	0.116038	-2.77899	0.00545287	0.025634
		ENSMUSG00000022283	5724.18	0.366412	0.113307	3.23381	0.00122151	0.00817259
		ENSMUSG00000022322	171.246	-0.430096	0.171502	-2.50781	0.0121482	0.0467846
		ENSMUSG00000022324	1351.16	0.335086	0.109857	3.0502	0.00228693	0.0131532
		ENSMUSG00000022329	541.549	0.495606	0.140857	3.5185	0.000433999	0.00367552
		ENSMUSG00000022336	6445.01	0.236164	0.0869916	2.71479	0.00663178	0.0295893
		ENSMUSG00000022338	1481.91	0.220557	0.0848132	2.6005	0.00930886	0.0382862
		ENSMUSG00000022350	2088.18	-0.237916	0.0800369	-2.97257	0.00295314	0.0160304
		ENSMUSG00000022358	10683.7	-0.719171	0.137229	-5.24067	1.5999e-07	8.38641e-06
		ENSMUSG00000022367	78.2177	0.751623	0.279054	2.69346	0.00707137	0.0310904
		ENSMUSG00000022383	2271.48	-0.570211	0.12813	-4.45025	8.57698e-06	0.000175464
		ENSMUSG00000022387	1980.41	-0.223384	0.0810782	-2.75517	0.00586613	0.0270493
		ENSMUSG00000022401	935.906	-0.330878	0.0979852	-3.37682	0.000733291	0.00552738
		ENSMUSG00000022412	1284.82	-0.22857	0.0758615	-3.01298	0.00258692	0.0144701
		ENSMUSG00000022425	833.467	0.331007	0.109763	3.01565	0.00256428	0.0143713
		ENSMUSG00000022428	803.359	0.259915	0.0897032	2.8975	0.00376151	0.0194531
		ENSMUSG00000022438	5223.64	-0.307206	0.0739206	-4.15589	3.24029e-05	0.000493469
		ENSMUSG00000022439	58.9503	1.07925	0.29475	3.66157	0.000250679	0.00242222
		ENSMUSG00000022440	546.507	0.583727	0.214744	2.71825	0.0065629	0.0293908
		ENSMUSG00000022443	7965.57	0.30581	0.0820929	3.72517	0.000195183	0.00198686
		ENSMUSG00000022450	13658.8	0.270965	0.0688593	3.93505	8.31781e-05	0.00101448
		ENSMUSG00000022468	272.42	0.46402	0.163032	2.84618	0.00442471	0.0220094
		ENSMUSG00000022469	2278.28	0.244628	0.0719311	3.40086	0.000671738	0.00515474
		ENSMUSG00000022477	147009	-0.277342	0.102017	-2.71859	0.00655602	0.0293691
		ENSMUSG00000022489	172.344	0.550617	0.181336	3.03645	0.00239379	0.0136109
		ENSMUSG00000022498	1096.87	-0.409911	0.118827	-3.44964	0.000561332	0.00448848
		ENSMUSG00000022500	1086.29	0.622026	0.156645	3.97092	7.15942e-05	0.000908963
		ENSMUSG00000022503	633.177	0.413447	0.11372	3.63566	0.000277274	0.00261656
		ENSMUSG00000022505	3706.36	0.38274	0.0794606	4.81673	1.45931e-06	4.47222e-05
		ENSMUSG00000022517	11896.5	-0.272181	0.0730092	-3.72804	0.000192974	0.00196576
		ENSMUSG00000022519	57038.2	-0.437347	0.110878	-3.9444	8.00003e-05	0.000983182
		ENSMUSG00000022521	1556.61	-0.299935	0.113399	-2.64495	0.00817029	0.0347291
		ENSMUSG00000022525	1921.29	-0.313903	0.11177	-2.80847	0.00497771	0.0240329
		ENSMUSG00000022528	784.787	0.66725	0.183448	3.63727	0.000275548	0.00260633
		ENSMUSG00000022533	3099.58	-0.39702	0.0871705	-4.55453	5.25037e-06	0.000119979
		ENSMUSG00000022548	362.082	0.643167	0.225056	2.85781	0.00426579	0.0214327
		ENSMUSG00000022552	1188.79	0.256119	0.0952205	2.68974	0.00715069	0.0312965
		ENSMUSG00000022558	1659.25	-0.43511	0.118766	-3.66359	0.000248705	0.00240959
		ENSMUSG00000022562	2782.2	-0.52727	0.120589	-4.37245	1.22861e-05	0.000235389
		ENSMUSG00000022565	12937.7	-0.490378	0.122958	-3.98819	6.65807e-05	0.000864533
		ENSMUSG00000022575	557.365	0.597834	0.164725	3.62928	0.000284214	0.00266839
		ENSMUSG00000022579	5469.54	0.706633	0.136808	5.16515	2.40243e-07	1.09625e-05
		ENSMUSG00000022587	9330.98	0.567134	0.144646	3.92083	8.82438e-05	0.00106459
		ENSMUSG00000022604	500.691	-0.394838	0.119174	-3.31311	0.000922654	0.00661686
		ENSMUSG00000022629	2017.3	-0.414525	0.138294	-2.99742	0.0027228	0.0150648
		ENSMUSG00000022641	1129.07	-0.271509	0.100912	-2.69054	0.00713363	0.031266
		ENSMUSG00000022651	21.8752	2.84217	0.868948	3.27082	0.00107235	0.00745745
		ENSMUSG00000022661	3426.62	0.690641	0.0768471	8.98721	2.53588e-19	1.83408e-15
		ENSMUSG00000022672	866.022	-0.354664	0.135446	-2.61849	0.00883186	0.0368164
		ENSMUSG00000022676	240.192	0.40735	0.1511	2.69589	0.00702011	0.030912
		ENSMUSG00000022677	3434.78	0.208121	0.0767199	2.71274	0.00667303	0.0297162
		ENSMUSG00000022681	1556.64	0.347702	0.0888944	3.9114	9.17613e-05	0.00110243
		ENSMUSG00000022682	2394.87	-0.394783	0.077655	-5.0838	3.69955e-07	1.52028e-05
		ENSMUSG00000022684	4164.73	-0.205075	0.067212	-3.05116	0.00227959	0.0131282
		ENSMUSG00000022698	3198.52	-0.332842	0.073967	-4.49988	6.79922e-06	0.000145618
		ENSMUSG00000022708	14448.1	-0.836542	0.266671	-3.13698	0.00170697	0.0104491
		ENSMUSG00000022711	1898.1	-0.285074	0.0834902	-3.41446	0.000639096	0.00497967
		ENSMUSG00000022723	2980.86	-0.304188	0.0771805	-3.94125	8.10584e-05	0.000994495
		ENSMUSG00000022724	1259.15	-0.234558	0.0913575	-2.56748	0.0102442	0.0411274
		ENSMUSG00000022742	2077.02	-0.443021	0.110308	-4.01621	5.91415e-05	0.000790649
		ENSMUSG00000022754	164.868	0.643552	0.191631	3.35829	0.000784257	0.00581162
		ENSMUSG00000022760	498.83	0.505401	0.133119	3.79663	0.000146678	0.00158218
		ENSMUSG00000022766	25.6664	1.18776	0.447696	2.65306	0.00797659	0.0341062
		ENSMUSG00000022772	860.187	-0.265374	0.0996253	-2.66372	0.00772825	0.0332205
		ENSMUSG00000022788	4226.15	-0.560228	0.124261	-4.50848	6.52949e-06	0.000142243
		ENSMUSG00000022789	7771.36	-0.384684	0.126509	-3.04076	0.00235981	0.01346
		ENSMUSG00000022799	4270.82	0.2818	0.0752919	3.74276	0.00018201	0.00187921
		ENSMUSG00000022800	4744.31	-0.272934	0.0862105	-3.1659	0.00154603	0.00971472
		ENSMUSG00000022812	3165.59	-0.365699	0.103515	-3.53281	0.000411168	0.0035151
		ENSMUSG00000022820	12506.6	0.299922	0.0843059	3.55754	0.000374342	0.00328173
		ENSMUSG00000022822	3543.91	-0.503895	0.122753	-4.10494	4.04424e-05	0.000589123
		ENSMUSG00000022831	626.387	0.485508	0.171616	2.82903	0.00466888	0.02294
		ENSMUSG00000022836	1843.09	0.302976	0.102872	2.94518	0.0032277	0.0172586
		ENSMUSG00000022840	4105.96	-0.563798	0.0812089	-6.94256	3.85063e-12	1.85665e-09
		ENSMUSG00000022841	9197.21	0.19779	0.0707623	2.79513	0.00518796	0.0247506
		ENSMUSG00000022855	1517.83	-0.197073	0.0760007	-2.59304	0.00951325	0.0388617
		ENSMUSG00000022865	2786.54	-0.691641	0.162629	-4.25289	2.11034e-05	0.000351476
		ENSMUSG00000022867	4300.2	-0.266804	0.07285	-3.66237	0.000249891	0.00241946
		ENSMUSG00000022890	36454.9	0.251731	0.0893054	2.81877	0.00482084	0.0235189
		ENSMUSG00000022892	10549.4	0.241686	0.0853179	2.83277	0.00461468	0.0227432
		ENSMUSG00000022895	5340.59	0.339619	0.0859272	3.9524	7.73703e-05	0.000957366
		ENSMUSG00000022897	2862.74	-0.336132	0.0850338	-3.95292	7.7204e-05	0.000956127
		ENSMUSG00000022905	7389.67	-0.385385	0.120311	-3.20324	0.00135892	0.0088847
		ENSMUSG00000022912	1607.5	0.397847	0.0979181	4.06305	4.8435e-05	0.000671084
		ENSMUSG00000022940	3419.53	0.26221	0.0885105	2.96248	0.00305175	0.0164776
		ENSMUSG00000022941	358.786	0.621127	0.153929	4.03516	5.45647e-05	0.000739717
		ENSMUSG00000022951	6707.92	-0.957624	0.318811	-3.00373	0.00266688	0.0148428
		ENSMUSG00000022956	52355.1	0.25748	0.0772502	3.33306	0.000858956	0.00625305
		ENSMUSG00000022971	1630.96	0.458547	0.0853498	5.37256	7.76259e-08	5.03524e-06
		ENSMUSG00000022973	1502.7	-0.281818	0.0872529	-3.2299	0.00123832	0.00824689
		ENSMUSG00000022978	218.61	0.52468	0.200303	2.61943	0.0088077	0.0367474
		ENSMUSG00000022983	1031.55	-0.241449	0.0932828	-2.58836	0.00964344	0.0393047
		ENSMUSG00000022992	3315.35	-0.177164	0.0578883	-3.06044	0.00221015	0.0128084
		ENSMUSG00000022994	13349.7	-0.447487	0.10974	-4.0777	4.54843e-05	0.000641883
		ENSMUSG00000022995	5770.85	-0.591102	0.13645	-4.33202	1.47751e-05	0.000270876
		ENSMUSG00000023004	14507.1	0.346889	0.0977954	3.54709	0.000389508	0.00337177
		ENSMUSG00000023007	1105.52	-0.254845	0.0864559	-2.94768	0.00320166	0.0171589
		ENSMUSG00000023008	2135	0.438431	0.101985	4.29897	1.71594e-05	0.000303435
		ENSMUSG00000023009	340.822	0.350252	0.129893	2.69648	0.00700775	0.0308763
		ENSMUSG00000023018	1808.32	-0.378286	0.105903	-3.57201	0.000354246	0.00314174
		ENSMUSG00000023019	3589.24	-0.407406	0.113661	-3.5844	0.000337857	0.00303684
		ENSMUSG00000023022	1679.05	0.384916	0.121531	3.16722	0.00153905	0.00969205
		ENSMUSG00000023026	1936.36	-0.347682	0.0990123	-3.5115	0.000445585	0.00375386
		ENSMUSG00000023027	2316.05	-0.333233	0.0741722	-4.4927	7.0327e-06	0.0001496
		ENSMUSG00000023036	61.3148	-1.05038	0.363675	-2.88824	0.00387407	0.0199283
		ENSMUSG00000023046	731.389	0.6245	0.227982	2.73926	0.00615784	0.0280722
		ENSMUSG00000023048	1330.29	0.306214	0.110219	2.77823	0.00546565	0.025669
		ENSMUSG00000023064	415.438	0.594569	0.211465	2.81166	0.0049286	0.0238564
		ENSMUSG00000023066	407.917	-0.525674	0.153516	-3.42423	0.000616545	0.00484428
		ENSMUSG00000023092	6160.83	-0.212387	0.0765608	-2.7741	0.0055355	0.0259113
		ENSMUSG00000023140	119.572	-1.04194	0.244856	-4.25531	2.08759e-05	0.000349503
		ENSMUSG00000023170	1174.34	0.329934	0.0874328	3.77358	0.000160923	0.00169909
		ENSMUSG00000023191	711.697	0.352009	0.135198	2.60365	0.00922356	0.0380111
		ENSMUSG00000023224	6199.51	0.519371	0.088264	5.8843	3.99746e-09	5.30489e-07
		ENSMUSG00000023348	881.316	0.303211	0.10679	2.83932	0.00452099	0.0223729
		ENSMUSG00000023367	587.648	0.577724	0.18897	3.05722	0.002234	0.0129156
		ENSMUSG00000023460	8605.89	-0.286509	0.0715714	-4.00312	6.25131e-05	0.000827312
		ENSMUSG00000023707	829.228	0.291668	0.110908	2.62981	0.00854323	0.0358792
		ENSMUSG00000023764	756.036	-0.490538	0.143856	-3.40992	0.000649824	0.00501853
		ENSMUSG00000023800	346.809	-1.05759	0.213704	-4.94886	7.465e-07	2.61456e-05
		ENSMUSG00000023809	3978.45	-0.429119	0.115762	-3.70691	0.000209803	0.00211632
		ENSMUSG00000023828	435.538	-0.703836	0.194855	-3.61209	0.000303734	0.00281275
		ENSMUSG00000023830	10682.4	-0.418813	0.100314	-4.17503	2.9794e-05	0.000460439
		ENSMUSG00000023845	5460.98	-0.598157	0.149059	-4.01289	5.99801e-05	0.000801119
		ENSMUSG00000023885	1458.86	0.438525	0.146188	2.99973	0.00270223	0.0149877
		ENSMUSG00000023913	610.786	0.72359	0.159224	4.54448	5.50714e-06	0.000124082
		ENSMUSG00000023915	1110.6	0.435607	0.110285	3.94984	7.82025e-05	0.000966011
		ENSMUSG00000023923	1385.17	-0.318856	0.0925345	-3.4458	0.000569362	0.00454265
		ENSMUSG00000023944	74219.3	-0.329023	0.117767	-2.79386	0.00520833	0.0248314
		ENSMUSG00000023947	107.891	0.69689	0.236606	2.94536	0.0032258	0.0172563
		ENSMUSG00000023951	16714.3	-0.71541	0.135869	-5.26543	1.3986e-07	7.66316e-06
		ENSMUSG00000023959	20754.4	-0.370117	0.118102	-3.13386	0.00172523	0.0105341
		ENSMUSG00000023965	1476.76	-0.354704	0.0936934	-3.7858	0.000153216	0.00163563
		ENSMUSG00000023973	1070.47	0.277771	0.0886168	3.13452	0.00172134	0.0105182
		ENSMUSG00000023977	6704.98	-0.623295	0.110428	-5.64436	1.65793e-08	1.5373e-06
		ENSMUSG00000023988	1360.82	-0.295508	0.105555	-2.79957	0.00511702	0.0245286
		ENSMUSG00000024002	1988.99	-0.229771	0.0847487	-2.71121	0.00670384	0.0298006
		ENSMUSG00000024006	2301.55	-0.286418	0.0873527	-3.27887	0.00104224	0.00731135
		ENSMUSG00000024008	128.143	-1.06662	0.222495	-4.7939	1.63568e-06	4.86834e-05
		ENSMUSG00000024038	13949.3	0.434244	0.10023	4.33247	1.47448e-05	0.000270876
		ENSMUSG00000024043	257.185	0.552895	0.19495	2.83609	0.00456695	0.0225541
		ENSMUSG00000024049	71108.1	-0.649581	0.147764	-4.39608	1.10223e-05	0.000216627
		ENSMUSG00000024054	1946.75	-0.25162	0.0908076	-2.77092	0.0055899	0.0260664
		ENSMUSG00000024059	10655.3	-0.281742	0.0702229	-4.01211	6.01792e-05	0.000803037
		ENSMUSG00000024067	1110.48	0.291292	0.100209	2.90684	0.00365097	0.0190448
		ENSMUSG00000024070	2252.08	0.186578	0.0715714	2.60689	0.00913698	0.0377834
		ENSMUSG00000024073	4977.27	-0.33047	0.11368	-2.90702	0.00364888	0.0190408
		ENSMUSG00000024077	2447.75	-0.355045	0.0989802	-3.58703	0.000334471	0.00301065
		ENSMUSG00000024084	298.774	0.500844	0.183627	2.72751	0.00638136	0.0287828
		ENSMUSG00000024085	2085.09	0.220113	0.0877032	2.50974	0.0120819	0.046666
		ENSMUSG00000024104	1962.99	-0.266986	0.0796409	-3.35237	0.000801217	0.00591608
		ENSMUSG00000024112	389.089	-0.589049	0.194709	-3.02528	0.00248406	0.0140195
		ENSMUSG00000024120	12954.3	-0.589578	0.142483	-4.13788	3.50523e-05	0.000527608
		ENSMUSG00000024122	3407.53	-0.389711	0.111779	-3.48645	0.00048947	0.00403659
		ENSMUSG00000024143	8865.83	-0.357434	0.089274	-4.00378	6.23375e-05	0.000825743
		ENSMUSG00000024145	127.614	0.606066	0.212988	2.84555	0.00443355	0.0220458
		ENSMUSG00000024163	5825.32	-0.4039	0.0787695	-5.12762	2.93429e-07	1.29011e-05
		ENSMUSG00000024168	3477.82	0.544986	0.113428	4.80468	1.54998e-06	4.70029e-05
		ENSMUSG00000024180	458.192	0.348067	0.122718	2.83633	0.00456359	0.0225529
		ENSMUSG00000024208	4562.9	0.279941	0.0973401	2.8759	0.00402876	0.0205342
		ENSMUSG00000024210	653.129	-0.36434	0.114129	-3.19235	0.00141122	0.00913755
		ENSMUSG00000024219	4616.66	-0.509346	0.0870411	-5.85178	4.86327e-09	6.02912e-07
		ENSMUSG00000024231	3032.31	-0.235805	0.0902176	-2.61374	0.00895573	0.0372469
		ENSMUSG00000024236	18237.5	-0.419832	0.0953529	-4.40293	1.06796e-05	0.000210752
		ENSMUSG00000024251	605.366	-0.273664	0.102939	-2.65851	0.00784882	0.0336295
		ENSMUSG00000024276	2448.57	-0.398619	0.114199	-3.49056	0.000482004	0.00399552
		ENSMUSG00000024290	3746.93	-0.206521	0.0832188	-2.48166	0.0130771	0.0494795
		ENSMUSG00000024298	1399.65	-0.510657	0.117582	-4.343	1.40551e-05	0.000261994
		ENSMUSG00000024304	15113.1	-0.315143	0.104224	-3.0237	0.002497	0.014076
		ENSMUSG00000024308	3428.44	0.291974	0.0935641	3.12057	0.00180498	0.0109472
		ENSMUSG00000024331	3030.26	-0.251448	0.0997785	-2.52006	0.0117336	0.0456376
		ENSMUSG00000024338	904.981	0.697784	0.194206	3.59301	0.000326884	0.00295893
		ENSMUSG00000024339	1781.3	0.379482	0.112671	3.36805	0.000757019	0.00565906
		ENSMUSG00000024346	3813.29	0.245507	0.0795184	3.08742	0.00201903	0.0119771
		ENSMUSG00000024349	476.547	0.851452	0.14733	5.77921	7.50539e-09	8.1019e-07
		ENSMUSG00000024359	46668.5	-0.414287	0.108588	-3.81521	0.000136069	0.00149109
		ENSMUSG00000024360	7126.69	-0.225231	0.0834006	-2.70059	0.00692158	0.0305899
		ENSMUSG00000024366	88.3865	0.688614	0.233759	2.94583	0.00322087	0.0172363
		ENSMUSG00000024370	2429.32	-0.216145	0.0635773	-3.39972	0.000674541	0.00517077
		ENSMUSG00000024371	58.1246	1.65906	0.425727	3.89701	9.73872e-05	0.0011509
		ENSMUSG00000024378	832.73	0.506893	0.133221	3.80491	0.000141855	0.00154165
		ENSMUSG00000024381	513.88	0.430737	0.15638	2.75442	0.00587958	0.0270854
		ENSMUSG00000024383	1534.75	-0.360259	0.115229	-3.12646	0.00176926	0.0107667
		ENSMUSG00000024384	2006.84	-0.303174	0.0912473	-3.32255	0.000891977	0.00644137
		ENSMUSG00000024393	9887.18	-0.313676	0.0782511	-4.00858	6.10837e-05	0.000812857
		ENSMUSG00000024395	4881.29	0.525243	0.121129	4.33623	1.44947e-05	0.000267412
		ENSMUSG00000024401	28.5779	1.83299	0.498104	3.67992	0.000233304	0.00229887
		ENSMUSG00000024414	1921.31	0.232512	0.0841657	2.76255	0.00573516	0.0265809
		ENSMUSG00000024427	915.959	0.38608	0.125397	3.07885	0.00207799	0.0122011
		ENSMUSG00000024440	2161.86	0.43848	0.107148	4.0923	4.27121e-05	0.000614146
		ENSMUSG00000024442	9313.95	-0.345121	0.0638462	-5.4055	6.46285e-08	4.36847e-06
		ENSMUSG00000024446	795.583	0.390099	0.10876	3.5868	0.000334764	0.00301142
		ENSMUSG00000024451	4707.52	0.214192	0.0761908	2.81125	0.0049349	0.023874
		ENSMUSG00000024472	1533.54	-0.301166	0.0876181	-3.43726	0.00058764	0.00466276
		ENSMUSG00000024474	4085.02	0.275965	0.106689	2.58665	0.00969153	0.0394562
		ENSMUSG00000024483	3633.38	-0.25509	0.0997066	-2.55841	0.0105152	0.0419143
		ENSMUSG00000024486	834.932	-0.473231	0.136753	-3.46047	0.000539235	0.00435572
		ENSMUSG00000024513	3939.88	0.206088	0.0632964	3.25593	0.00113023	0.00774456
		ENSMUSG00000024527	9222.58	-0.367894	0.103305	-3.56125	0.000369089	0.00324749
		ENSMUSG00000024534	496.6	0.424975	0.164203	2.58811	0.00965038	0.0393219
		ENSMUSG00000024538	1450.76	0.481406	0.121136	3.9741	7.06469e-05	0.000901749
		ENSMUSG00000024548	797.66	-0.581678	0.184269	-3.15668	0.00159574	0.00994071
		ENSMUSG00000024558	352.162	-0.798626	0.271876	-2.93747	0.00330903	0.0176169
		ENSMUSG00000024560	1896.53	0.311402	0.0958177	3.24994	0.00115429	0.00784258
		ENSMUSG00000024576	11184.4	-0.331018	0.060878	-5.4374	5.40626e-08	3.73696e-06
		ENSMUSG00000024580	1366.99	-0.320601	0.124997	-2.56486	0.0103217	0.0413011
		ENSMUSG00000024589	1346.95	-0.350365	0.0907596	-3.86036	0.000113222	0.00129665
		ENSMUSG00000024601	3601.84	-0.226586	0.083805	-2.70373	0.00685651	0.0303766
		ENSMUSG00000024608	22369.1	0.643463	0.110119	5.84335	5.11607e-09	6.21882e-07
		ENSMUSG00000024617	2479.47	-0.295957	0.109612	-2.70004	0.00693308	0.0306033
		ENSMUSG00000024620	4517.47	0.319997	0.0888987	3.59957	0.000318741	0.00290672
		ENSMUSG00000024621	3365.52	0.418744	0.145912	2.86984	0.00410681	0.0208292
		ENSMUSG00000024622	1405.48	-0.254067	0.0760602	-3.34034	0.000836755	0.00610987
		ENSMUSG00000024646	3363.97	0.48756	0.0821713	5.93346	2.96616e-09	4.24807e-07
		ENSMUSG00000024659	1615.12	0.698977	0.163161	4.28398	1.83583e-05	0.000319559
		ENSMUSG00000024663	682.87	0.757725	0.171218	4.4255	9.62169e-06	0.000193571
		ENSMUSG00000024665	226.325	0.638042	0.165903	3.84587	0.000120127	0.00135395
		ENSMUSG00000024667	260.493	0.392378	0.140611	2.79052	0.00526231	0.0250393
		ENSMUSG00000024678	857.365	0.588543	0.143347	4.10572	4.03061e-05	0.000587729
		ENSMUSG00000024687	6869.49	-0.43177	0.0811615	-5.31989	1.03833e-07	6.18083e-06
		ENSMUSG00000024691	748.858	0.695329	0.141319	4.9203	8.64138e-07	2.92734e-05
		ENSMUSG00000024725	2180.01	0.384236	0.0962215	3.99324	6.51761e-05	0.000850877
		ENSMUSG00000024737	257.027	0.805183	0.227735	3.53562	0.000406821	0.00349032
		ENSMUSG00000024740	11410.1	-0.258462	0.0739134	-3.49682	0.000470843	0.00391873
		ENSMUSG00000024743	2467.99	-0.248273	0.0940806	-2.63894	0.00831651	0.0351955
		ENSMUSG00000024750	7498.75	-0.337612	0.0819858	-4.11793	3.82283e-05	0.000563108
		ENSMUSG00000024759	1781.38	0.240861	0.0971223	2.47998	0.0131391	0.0496138
		ENSMUSG00000024764	1203.49	-0.414056	0.126588	-3.27088	0.00107212	0.00745745
		ENSMUSG00000024776	202.92	0.604785	0.189787	3.18666	0.00143927	0.00925701
		ENSMUSG00000024780	5369.12	-0.399138	0.123323	-3.23652	0.00120996	0.00812913
		ENSMUSG00000024782	8750.94	-0.318131	0.0647551	-4.91284	8.9768e-07	3.03155e-05
		ENSMUSG00000024805	2278.42	-0.213779	0.0800287	-2.67128	0.00755621	0.0326563
		ENSMUSG00000024807	1579.26	-0.760194	0.131089	-5.79908	6.66813e-09	7.60237e-07
		ENSMUSG00000024810	182.963	0.758046	0.288641	2.62626	0.00863278	0.0361637
		ENSMUSG00000024811	6835.95	-0.317235	0.104553	-3.03419	0.00241183	0.0136973
		ENSMUSG00000024816	682.162	0.492936	0.112273	4.39051	1.13085e-05	0.000221051
		ENSMUSG00000024818	415.655	0.604405	0.169849	3.55849	0.000372997	0.0032759
		ENSMUSG00000024835	1376.3	0.466914	0.113872	4.10033	4.12565e-05	0.000597373
		ENSMUSG00000024843	630.087	-0.582341	0.112478	-5.17738	2.25027e-07	1.05001e-05
		ENSMUSG00000024844	2664.47	0.191632	0.0754701	2.53917	0.0111115	0.0437354
		ENSMUSG00000024862	2922.68	-0.245711	0.0902558	-2.72238	0.00648137	0.0291339
		ENSMUSG00000024885	143.383	0.776354	0.244822	3.17109	0.00151866	0.00961844
		ENSMUSG00000024908	5867.69	-0.261498	0.0689195	-3.79426	0.000148087	0.00159381
		ENSMUSG00000024921	3314.82	-0.219255	0.0867603	-2.52713	0.0114998	0.0448887
		ENSMUSG00000024924	28569.6	-0.433614	0.103323	-4.1967	2.70827e-05	0.000430495
		ENSMUSG00000024925	474.989	0.327923	0.119672	2.74019	0.0061403	0.0280451
		ENSMUSG00000024937	15023.7	-0.425767	0.0920592	-4.62493	3.74734e-06	9.25005e-05
		ENSMUSG00000024939	908.971	0.371532	0.118076	3.14654	0.00165217	0.0102044
		ENSMUSG00000024959	872.657	0.362714	0.105654	3.43305	0.000596834	0.00472276
		ENSMUSG00000024963	1587.46	0.283647	0.0869806	3.26104	0.00111005	0.00767168
		ENSMUSG00000024965	340.766	0.439871	0.16736	2.62829	0.00858144	0.0359858
		ENSMUSG00000024981	1594.7	0.545752	0.118361	4.61092	4.00889e-06	9.7624e-05
		ENSMUSG00000024986	217.01	0.965136	0.188463	5.1211	3.03758e-07	1.32745e-05
		ENSMUSG00000024998	1852.75	-0.308142	0.0882633	-3.49117	0.000480916	0.00399108
		ENSMUSG00000025006	15866.6	-0.605019	0.116548	-5.19114	2.09009e-07	1.00039e-05
		ENSMUSG00000025019	524.673	-0.598198	0.161663	-3.70028	0.000215361	0.00215734
		ENSMUSG00000025047	1453.17	-0.331764	0.0780161	-4.2525	2.11396e-05	0.000351476
		ENSMUSG00000025059	2314.21	-0.37161	0.145231	-2.55876	0.0105047	0.0418942
		ENSMUSG00000025060	9922.61	-0.54192	0.126533	-4.28285	1.84518e-05	0.000320058
		ENSMUSG00000025068	6758.16	-0.31971	0.0637569	-5.01452	5.31669e-07	2.02384e-05
		ENSMUSG00000025075	140.128	-0.971678	0.228274	-4.25663	2.07532e-05	0.000347851
		ENSMUSG00000025076	590.922	0.455416	0.122691	3.71191	0.000205702	0.00208075
		ENSMUSG00000025078	1162.83	-0.584435	0.112206	-5.20859	1.90286e-07	9.33047e-06
		ENSMUSG00000025083	245.634	0.395172	0.148659	2.65824	0.00785511	0.0336465
		ENSMUSG00000025085	27061.2	-0.408014	0.0793772	-5.14019	2.74459e-07	1.21408e-05
		ENSMUSG00000025092	2505.3	-0.361571	0.118677	-3.04668	0.00231383	0.01325
		ENSMUSG00000025132	7425.85	0.304862	0.113693	2.68145	0.00733034	0.031957
		ENSMUSG00000025144	1055.9	0.407622	0.119938	3.39859	0.000677337	0.00518122
		ENSMUSG00000025150	1441.39	0.660174	0.178636	3.69565	0.000219325	0.0021925
		ENSMUSG00000025209	1973.7	-0.427018	0.0792594	-5.38761	7.14016e-08	4.66066e-06
		ENSMUSG00000025212	754.816	0.373725	0.120848	3.09252	0.00198462	0.0118333
		ENSMUSG00000025220	7514.47	-0.311041	0.0754294	-4.1236	3.7299e-05	0.000553364
		ENSMUSG00000025221	10822.9	-0.248109	0.0799972	-3.10147	0.00192563	0.0115578
		ENSMUSG00000025223	2728.24	0.237421	0.0874228	2.71577	0.0066121	0.029538
		ENSMUSG00000025224	2833.32	-0.380665	0.0756524	-5.03176	4.85991e-07	1.88468e-05
		ENSMUSG00000025234	4941.46	-0.351969	0.095033	-3.70366	0.000212515	0.00213623
		ENSMUSG00000025239	3960.67	-0.248718	0.0575625	-4.32083	1.55447e-05	0.000281419
		ENSMUSG00000025241	32660.8	-0.590216	0.117237	-5.0344	4.79341e-07	1.87346e-05
		ENSMUSG00000025261	13703	-0.515769	0.116596	-4.42357	9.70847e-06	0.000194506
		ENSMUSG00000025262	879.283	-0.473072	0.119156	-3.97021	7.18096e-05	0.000909527
		ENSMUSG00000025265	484.118	-0.377035	0.128389	-2.93666	0.0033177	0.0176565
		ENSMUSG00000025266	2077.34	-0.264302	0.0882289	-2.99563	0.00273874	0.0151263
		ENSMUSG00000025268	1518.2	0.349557	0.139511	2.50558	0.012225	0.0470208
		ENSMUSG00000025283	1986.77	0.664841	0.126353	5.26178	1.42667e-07	7.69523e-06
		ENSMUSG00000025289	895.254	0.568634	0.101366	5.6097	2.02675e-08	1.76608e-06
		ENSMUSG00000025290	23801.2	0.491426	0.107824	4.55765	5.17282e-06	0.000119148
		ENSMUSG00000025316	772.476	-0.690728	0.156002	-4.42768	9.52514e-06	0.000192029
		ENSMUSG00000025326	6333.31	-0.363338	0.142347	-2.55248	0.010696	0.042505
		ENSMUSG00000025332	2418.32	-0.240239	0.0743669	-3.23045	0.00123596	0.00823497
		ENSMUSG00000025358	653.345	0.595603	0.10392	5.73136	9.96264e-09	1.02205e-06
		ENSMUSG00000025362	5863.61	0.486405	0.0869743	5.59251	2.23806e-08	1.89862e-06
		ENSMUSG00000025381	1537.02	0.314298	0.0938767	3.34798	0.000814018	0.0059892
		ENSMUSG00000025402	545.31	0.740995	0.110925	6.68012	2.3874e-11	7.0477e-09
		ENSMUSG00000025417	2440.08	-0.217187	0.0716692	-3.03041	0.00244226	0.0138159
		ENSMUSG00000025422	440.308	0.633036	0.184215	3.4364	0.0005895	0.00467495
		ENSMUSG00000025429	980.298	-0.51142	0.1098	-4.65774	3.19692e-06	8.08453e-05
		ENSMUSG00000025437	2113.29	-0.232277	0.0836194	-2.77778	0.0054731	0.0256873
		ENSMUSG00000025453	28216.2	-0.429298	0.102605	-4.18397	2.86466e-05	0.000448941
		ENSMUSG00000025470	369.304	0.437185	0.137507	3.17937	0.00147595	0.00943278
		ENSMUSG00000025484	916.239	0.447792	0.100994	4.43384	9.25702e-06	0.000187539
		ENSMUSG00000025488	26563.8	0.306428	0.0939772	3.26066	0.00111152	0.00767572
		ENSMUSG00000025491	175.555	0.781628	0.257861	3.0312	0.00243588	0.013796
		ENSMUSG00000025492	3672.74	0.933975	0.159373	5.86031	4.61993e-09	5.86205e-07
		ENSMUSG00000025494	450.991	0.437774	0.13733	3.18775	0.00143382	0.00923127
		ENSMUSG00000025498	1075.49	0.983981	0.19249	5.11186	3.18997e-07	1.38567e-05
		ENSMUSG00000025504	240.875	0.528572	0.161486	3.27317	0.00106348	0.00741363
		ENSMUSG00000025533	350.083	0.656884	0.131617	4.99088	6.01063e-07	2.22607e-05
		ENSMUSG00000025537	1430.82	-0.243052	0.078636	-3.09085	0.00199582	0.0118902
		ENSMUSG00000025544	8966.33	-0.316752	0.0653834	-4.84454	1.26906e-06	4.03451e-05
		ENSMUSG00000025545	4763.08	-0.172854	0.0695114	-2.4867	0.0128933	0.0489247
		ENSMUSG00000025572	732.343	0.556045	0.107436	5.17558	2.27207e-07	1.05677e-05
		ENSMUSG00000025574	256.971	-0.371915	0.14962	-2.48572	0.0129288	0.0490467
		ENSMUSG00000025579	7537.68	-0.450324	0.106213	-4.23982	2.23698e-05	0.000368962
		ENSMUSG00000025583	2118.93	-0.310615	0.0874946	-3.55011	0.000385075	0.00334541
		ENSMUSG00000025586	891.335	-0.738485	0.125567	-5.88122	4.0726e-09	5.35547e-07
		ENSMUSG00000025597	378.312	0.542008	0.178488	3.03666	0.00239215	0.013607
		ENSMUSG00000025608	12183	0.635221	0.0850106	7.47226	7.88284e-14	8.14467e-11
		ENSMUSG00000025610	67.3343	1.03909	0.305202	3.40461	0.000662589	0.00510077
		ENSMUSG00000025612	2334.92	-0.322865	0.089076	-3.6246	0.000289408	0.00270419
		ENSMUSG00000025646	98.1435	-0.981079	0.358127	-2.73947	0.00615378	0.0280714
		ENSMUSG00000025647	2071.83	0.581445	0.114865	5.06196	4.14959e-07	1.67549e-05
		ENSMUSG00000025651	34267.6	-0.208904	0.07507	-2.78279	0.00538944	0.025377
		ENSMUSG00000025701	1202.62	0.478652	0.154193	3.10424	0.00190772	0.0114645
		ENSMUSG00000025732	5293.94	0.224167	0.0634128	3.53504	0.000407717	0.00349179
		ENSMUSG00000025738	154.351	-0.721582	0.196084	-3.67996	0.00023327	0.00229887
		ENSMUSG00000025743	4485.87	0.399317	0.110752	3.60549	0.00031156	0.0028614
		ENSMUSG00000025757	4136.1	-0.428749	0.139283	-3.07825	0.0020822	0.0122088
		ENSMUSG00000025759	1146.54	-0.39757	0.086095	-4.61781	3.87819e-06	9.52428e-05
		ENSMUSG00000025784	2579.63	0.601893	0.151429	3.97476	7.04514e-05	0.000901043
		ENSMUSG00000025790	5497.52	-0.341641	0.119562	-2.85742	0.00427094	0.0214511
		ENSMUSG00000025791	12632.3	-0.267145	0.0954953	-2.79746	0.00515054	0.0246127
		ENSMUSG00000025794	12939.5	0.303054	0.0976917	3.10215	0.00192122	0.0115361
		ENSMUSG00000025795	9796.52	-0.183436	0.0603196	-3.04106	0.00235748	0.013452
		ENSMUSG00000025812	1925.2	-0.313145	0.0929541	-3.36881	0.000754933	0.00564638
		ENSMUSG00000025813	5988.88	-0.388878	0.107133	-3.62985	0.000283591	0.00266763
		ENSMUSG00000025815	420.803	-0.45177	0.177205	-2.54942	0.0107902	0.04275
		ENSMUSG00000025816	846.099	-0.324336	0.112849	-2.87406	0.00405237	0.0206255
		ENSMUSG00000025880	620.358	0.474775	0.143047	3.31902	0.000903332	0.00650084
		ENSMUSG00000025885	2474.62	-0.550136	0.121713	-4.51996	6.18526e-06	0.000136595
		ENSMUSG00000025888	205.701	0.779403	0.258221	3.01835	0.00254152	0.0142825
		ENSMUSG00000025902	658.328	0.33873	0.136587	2.47995	0.01314	0.0496138
		ENSMUSG00000025903	4424.59	-0.255643	0.0886517	-2.88368	0.00393059	0.0201665
		ENSMUSG00000025930	236.583	0.886112	0.218471	4.05597	4.99273e-05	0.000686501
		ENSMUSG00000025931	150.14	0.574706	0.172757	3.32668	0.000878875	0.00635964
		ENSMUSG00000025938	1159.27	-0.627664	0.138722	-4.52462	6.05043e-06	0.000134027
		ENSMUSG00000025949	1153.91	-0.276203	0.0952085	-2.90104	0.00371931	0.01929
		ENSMUSG00000025967	10234.1	0.231372	0.0922095	2.5092	0.0121006	0.0466926
		ENSMUSG00000025980	25029.9	-0.33284	0.13146	-2.53187	0.0113457	0.0444156
		ENSMUSG00000025997	287.86	-0.521608	0.17765	-2.93616	0.00332301	0.0176783
		ENSMUSG00000026003	51310.3	-0.28754	0.0917359	-3.13443	0.00172189	0.0105182
		ENSMUSG00000026004	1600.62	-0.277261	0.104942	-2.64205	0.00824056	0.0349828
		ENSMUSG00000026012	300.096	-0.568411	0.139752	-4.06727	4.75673e-05	0.000662872
		ENSMUSG00000026014	4685	-0.536624	0.118122	-4.54297	5.54667e-06	0.000124774
		ENSMUSG00000026017	503.441	-0.518242	0.128444	-4.03477	5.46548e-05	0.000740245
		ENSMUSG00000026028	14595.2	-0.546116	0.0898966	-6.07494	1.24036e-09	2.08626e-07
		ENSMUSG00000026029	691.028	0.526789	0.151489	3.47741	0.000506277	0.0041586
		ENSMUSG00000026064	6378.58	-0.271226	0.0952438	-2.8477	0.0044037	0.0219426
		ENSMUSG00000026072	1034.32	0.265647	0.0884578	3.0031	0.00267247	0.0148682
		ENSMUSG00000026078	2956.58	0.378436	0.102986	3.67464	0.000238183	0.00233461
		ENSMUSG00000026083	6928.04	-0.261818	0.0940459	-2.78394	0.00537027	0.0253627
		ENSMUSG00000026087	10228.1	0.354871	0.0850184	4.17405	2.9923e-05	0.000460727
		ENSMUSG00000026088	287.347	0.6126	0.140077	4.3733	1.2238e-05	0.000235026
		ENSMUSG00000026090	58.7249	-1.16217	0.305135	-3.80869	0.000139703	0.00152169
		ENSMUSG00000026100	21.928	1.39355	0.551389	2.52734	0.0114932	0.0448835
		ENSMUSG00000026103	4290.59	-0.205338	0.0819559	-2.50547	0.012229	0.0470208
		ENSMUSG00000026111	1420.97	0.232305	0.0853074	2.72315	0.00646626	0.0290841
		ENSMUSG00000026112	11391.4	-0.346105	0.0970478	-3.56634	0.000362004	0.00319917
		ENSMUSG00000026113	1229.56	-0.380469	0.0917485	-4.14687	3.37054e-05	0.000509455
		ENSMUSG00000026114	183.358	-0.56273	0.214607	-2.62214	0.00873787	0.0365153
		ENSMUSG00000026116	2711.56	-0.439721	0.0835683	-5.26182	1.42639e-07	7.69523e-06
		ENSMUSG00000026121	1518.07	0.381059	0.110205	3.45774	0.000544735	0.00439219
		ENSMUSG00000026123	6601.43	-0.357149	0.0916069	-3.89871	9.67054e-05	0.00114507
		ENSMUSG00000026131	32251.9	-0.609784	0.134667	-4.52808	5.9522e-06	0.000132459
		ENSMUSG00000026135	889.851	-0.52229	0.120127	-4.34781	1.37506e-05	0.000257853
		ENSMUSG00000026153	1701.8	-0.285563	0.108638	-2.62856	0.00857468	0.0359828
		ENSMUSG00000026154	1910.4	0.343354	0.0782591	4.3874	1.14716e-05	0.000222923
		ENSMUSG00000026171	737.49	0.272499	0.105853	2.57432	0.0100438	0.0405142
		ENSMUSG00000026177	348.188	0.559655	0.225373	2.48324	0.0130194	0.0492742
		ENSMUSG00000026204	354.154	-0.466619	0.167601	-2.78411	0.00536741	0.0253627
		ENSMUSG00000026207	10530.9	-0.656394	0.12464	-5.26632	1.39188e-07	7.66316e-06
		ENSMUSG00000026208	81332.1	-0.281676	0.0904809	-3.1131	0.00185134	0.0111721
		ENSMUSG00000026211	4398.42	-0.668251	0.0970177	-6.88793	5.66112e-12	2.559e-09
		ENSMUSG00000026219	9276.28	-0.44242	0.0758697	-5.83132	5.49907e-09	6.467e-07
		ENSMUSG00000026222	2263.51	0.315618	0.0845932	3.73101	0.000190713	0.00194821
		ENSMUSG00000026223	3836.76	0.287747	0.0843437	3.41161	0.000645812	0.00500625
		ENSMUSG00000026229	8485.74	-0.239636	0.0922024	-2.59902	0.0093491	0.0383971
		ENSMUSG00000026235	3758.02	-0.70019	0.139108	-5.03342	4.81802e-07	1.87346e-05
		ENSMUSG00000026238	10623.6	0.463805	0.10974	4.2264	2.3746e-05	0.000386289
		ENSMUSG00000026248	2778.07	-0.168236	0.0614721	-2.73679	0.00620418	0.0281904
		ENSMUSG00000026249	1547.2	0.372136	0.108702	3.42346	0.000618298	0.00485278
		ENSMUSG00000026254	3147.57	-0.309561	0.0674703	-4.58811	4.4727e-06	0.000106762
		ENSMUSG00000026255	210.571	0.621703	0.213411	2.91317	0.00357776	0.018744
		ENSMUSG00000026278	270.669	0.495343	0.144168	3.43587	0.000590657	0.00468156
		ENSMUSG00000026305	3920.65	-0.485882	0.111864	-4.34351	1.40227e-05	0.000261727
		ENSMUSG00000026308	3619.7	-0.321262	0.0989028	-3.24826	0.00116113	0.00788161
		ENSMUSG00000026313	1612.3	-0.42668	0.11115	-3.8388	0.000123639	0.00138111
		ENSMUSG00000026315	207.344	0.622343	0.161336	3.85743	0.000114584	0.00130667
		ENSMUSG00000026319	1249.29	-0.262859	0.0883057	-2.97669	0.00291377	0.0158569
		ENSMUSG00000026339	1423.79	-0.262989	0.0822736	-3.19652	0.00139096	0.00903873
		ENSMUSG00000026349	2774.13	-0.632351	0.0977517	-6.46895	9.8683e-11	2.41941e-08
		ENSMUSG00000026355	594.887	0.494157	0.124882	3.957	7.5896e-05	0.00094836
		ENSMUSG00000026360	2670.2	0.458148	0.119148	3.8452	0.000120455	0.00135489
		ENSMUSG00000026361	2394.11	-0.50171	0.105752	-4.74421	2.09322e-06	5.76731e-05
		ENSMUSG00000026374	2623.84	-0.268397	0.0741852	-3.61793	0.000296969	0.00276426
		ENSMUSG00000026384	3046.7	-0.470685	0.146463	-3.21367	0.00131049	0.00863607
		ENSMUSG00000026385	5456.86	0.288765	0.0995644	2.90028	0.00372829	0.0193089
		ENSMUSG00000026389	1917.99	-0.333836	0.110725	-3.01502	0.00256965	0.0143958
		ENSMUSG00000026399	1049.65	0.504035	0.168454	2.99211	0.00277055	0.015224
		ENSMUSG00000026409	6684.54	-0.732219	0.242736	-3.01652	0.00255697	0.0143414
		ENSMUSG00000026421	2654.23	0.539113	0.121841	4.42471	9.65712e-06	0.000193912
		ENSMUSG00000026439	1465.44	-0.226014	0.0912426	-2.47707	0.0132466	0.0499252
		ENSMUSG00000026455	1965.66	-0.25395	0.101116	-2.51148	0.0120225	0.0464865
		ENSMUSG00000026463	1916.21	0.340334	0.109798	3.09963	0.00193764	0.0116081
		ENSMUSG00000026466	6472.84	-0.26789	0.0673448	-3.97789	6.95306e-05	0.000893215
		ENSMUSG00000026469	2867.77	-0.274737	0.0861509	-3.18902	0.00142758	0.00921049
		ENSMUSG00000026475	112.12	1.27806	0.338659	3.77388	0.000160731	0.0016983
		ENSMUSG00000026479	400.485	-0.419523	0.168465	-2.49027	0.0127647	0.0485796
		ENSMUSG00000026480	439.746	0.566121	0.170808	3.31437	0.0009185	0.00659373
		ENSMUSG00000026482	2103.87	0.300694	0.116118	2.58956	0.00960998	0.0391904
		ENSMUSG00000026483	1430.56	0.505539	0.0907948	5.56793	2.5779e-08	2.10457e-06
		ENSMUSG00000026494	208.876	-0.923543	0.194783	-4.7414	2.12248e-06	5.81471e-05
		ENSMUSG00000026496	3077.45	-0.220577	0.0801443	-2.75224	0.00591889	0.0272338
		ENSMUSG00000026499	1591.14	-0.282042	0.0898993	-3.13732	0.00170502	0.0104416
		ENSMUSG00000026500	2510.35	0.240952	0.0875691	2.75156	0.0059312	0.0272711
		ENSMUSG00000026511	3269.86	0.261515	0.0769717	3.39754	0.000679943	0.0051984
		ENSMUSG00000026516	1553.38	-0.214338	0.0857346	-2.50002	0.0124186	0.0476716
		ENSMUSG00000026536	633.953	0.485468	0.177651	2.73271	0.00628158	0.0284392
		ENSMUSG00000026547	4487.57	0.522023	0.155775	3.35112	0.000804845	0.00593984
		ENSMUSG00000026548	258.123	0.892323	0.215667	4.13751	3.51092e-05	0.000527916
		ENSMUSG00000026554	9794.67	-0.215664	0.0650723	-3.31423	0.000918975	0.00659373
		ENSMUSG00000026564	1803.37	-0.410059	0.120907	-3.39151	0.000695075	0.00528745
		ENSMUSG00000026566	899.032	0.526501	0.122515	4.29745	1.72775e-05	0.000304408
		ENSMUSG00000026571	4828.77	-0.20907	0.078566	-2.66108	0.00778915	0.0334134
		ENSMUSG00000026574	5821.13	0.45951	0.142137	3.23286	0.00122556	0.00818829
		ENSMUSG00000026575	173.639	0.427125	0.168272	2.5383	0.0111393	0.0438329
		ENSMUSG00000026576	11773.7	-0.328755	0.0806387	-4.0769	4.56408e-05	0.000643464
		ENSMUSG00000026585	1727.75	-0.3313	0.0916171	-3.61614	0.000299034	0.0027799
		ENSMUSG00000026596	1982	-0.33271	0.0921497	-3.61054	0.000305561	0.0028244
		ENSMUSG00000026610	2549.72	-0.558647	0.111615	-5.00513	5.58234e-07	2.10832e-05
		ENSMUSG00000026618	7501.16	-0.27842	0.0901134	-3.08966	0.00200387	0.0119284
		ENSMUSG00000026623	7526.92	-0.666329	0.106993	-6.22778	4.73087e-10	9.00422e-08
		ENSMUSG00000026640	4001.2	-0.500551	0.103079	-4.85601	1.19776e-06	3.85014e-05
		ENSMUSG00000026655	406.07	0.369731	0.140145	2.6382	0.00833469	0.0352415
		ENSMUSG00000026663	8578.26	-0.596402	0.14884	-4.00699	6.1497e-05	0.000816855
		ENSMUSG00000026664	36254.4	-0.24007	0.0914288	-2.62575	0.0086457	0.0362073
		ENSMUSG00000026667	3063.44	-0.175332	0.056565	-3.09965	0.00193752	0.0116081
		ENSMUSG00000026672	6228.04	-0.317843	0.120807	-2.63099	0.00851361	0.0357961
		ENSMUSG00000026678	46742	0.590407	0.0823032	7.17357	7.30679e-13	4.80421e-10
		ENSMUSG00000026712	2291.53	0.342609	0.133448	2.56735	0.0102478	0.0411307
		ENSMUSG00000026727	1822.16	0.515931	0.0883456	5.83992	5.22268e-09	6.24348e-07
		ENSMUSG00000026728	11733.1	0.368636	0.145708	2.52997	0.0114073	0.0446205
		ENSMUSG00000026740	1848.25	-0.235565	0.0761683	-3.0927	0.00198347	0.0118313
		ENSMUSG00000026748	1511.11	0.427986	0.0959421	4.46088	8.16229e-06	0.000169151
		ENSMUSG00000026755	4885.74	-0.203515	0.0660371	-3.08183	0.00205731	0.0121416
		ENSMUSG00000026764	79.8521	-0.795068	0.250746	-3.17081	0.00152015	0.00962321
		ENSMUSG00000026768	293.194	0.543087	0.17581	3.08906	0.0020079	0.0119426
		ENSMUSG00000026792	982.048	-0.284065	0.0903562	-3.14384	0.00166747	0.0102769
		ENSMUSG00000026812	2766.61	-0.352164	0.0968003	-3.63805	0.000274709	0.00260057
		ENSMUSG00000026819	743.376	0.65836	0.120622	5.45806	4.81374e-08	3.44707e-06
		ENSMUSG00000026821	1092.69	0.485556	0.121336	4.00176	6.28735e-05	0.000830562
		ENSMUSG00000026824	3126.84	-0.351653	0.135337	-2.59836	0.00936713	0.0384603
		ENSMUSG00000026849	509.314	0.301755	0.120656	2.50096	0.0123856	0.0475724
		ENSMUSG00000026854	2337.32	-0.471984	0.0873463	-5.40359	6.53193e-08	4.39462e-06
		ENSMUSG00000026858	4875.47	-0.362779	0.0659621	-5.49981	3.80211e-08	2.86446e-06
		ENSMUSG00000026867	2766.2	-0.312791	0.0809501	-3.864	0.000111546	0.0012826
		ENSMUSG00000026878	7543.04	-0.225793	0.0551802	-4.09191	4.27834e-05	0.00061456
		ENSMUSG00000026880	7401.54	-0.285976	0.0955099	-2.9942	0.00275162	0.015157
		ENSMUSG00000026896	755.76	0.530709	0.11448	4.63584	3.55496e-06	8.83547e-05
		ENSMUSG00000026921	7295.85	0.764388	0.0987056	7.74412	9.62446e-15	1.54687e-11
		ENSMUSG00000026923	3619.48	0.230292	0.0827368	2.78343	0.0053787	0.0253677
		ENSMUSG00000026924	3009.56	-0.256666	0.0663307	-3.8695	0.000109061	0.00126197
		ENSMUSG00000026926	10297	-0.418321	0.0822366	-5.0868	3.64162e-07	1.50503e-05
		ENSMUSG00000026932	1970.32	-0.522448	0.0914392	-5.71361	1.10604e-08	1.10337e-06
		ENSMUSG00000026933	1665.66	-0.276571	0.105231	-2.62824	0.00858285	0.0359858
		ENSMUSG00000026944	4089.6	-0.548202	0.118921	-4.60978	4.03092e-06	9.79955e-05
		ENSMUSG00000026946	597.565	0.427133	0.125254	3.41012	0.000649337	0.00501853
		ENSMUSG00000026950	335.126	-1.31409	0.250894	-5.23762	1.62661e-07	8.43332e-06
		ENSMUSG00000026956	361.737	0.534226	0.151378	3.52909	0.000416993	0.00355649
		ENSMUSG00000026966	1386.6	0.304439	0.103815	2.93251	0.00336229	0.0178479
		ENSMUSG00000026971	959.417	-0.456643	0.12514	-3.64906	0.000263204	0.00251369
		ENSMUSG00000026972	332.412	0.668331	0.183645	3.63926	0.000273423	0.00259349
		ENSMUSG00000026991	8099.31	0.328558	0.0861878	3.81211	0.000137785	0.00150306
		ENSMUSG00000027002	5910.48	-0.149212	0.0554831	-2.68933	0.00715962	0.0313261
		ENSMUSG00000027006	2874.77	0.19001	0.0687605	2.76336	0.00572102	0.0265324
		ENSMUSG00000027007	2382.35	0.214434	0.0801432	2.67564	0.00745877	0.0323609
		ENSMUSG00000027010	13452	-0.307746	0.0939295	-3.27635	0.00105157	0.00735619
		ENSMUSG00000027067	2709.36	0.175014	0.0702799	2.49025	0.0127654	0.0485796
		ENSMUSG00000027074	5365.57	0.398009	0.0971635	4.09628	4.19835e-05	0.000606079
		ENSMUSG00000027086	1589.24	-0.555626	0.0918349	-6.05027	1.44599e-09	2.35014e-07
		ENSMUSG00000027087	1284.35	-0.340011	0.099357	-3.42212	0.000621358	0.00487152
		ENSMUSG00000027109	2886.93	0.24655	0.0672739	3.66487	0.000247462	0.00240062
		ENSMUSG00000027133	2146.79	0.338741	0.0930324	3.6411	0.000271471	0.00257835
		ENSMUSG00000027134	140.605	0.569788	0.181492	3.13946	0.0016926	0.010392
		ENSMUSG00000027170	6912.38	0.237814	0.0762187	3.12016	0.00180755	0.0109582
		ENSMUSG00000027177	13655.2	-0.650258	0.103377	-6.29017	3.17114e-10	6.37571e-08
		ENSMUSG00000027185	1089.61	-0.359749	0.081439	-4.4174	9.98941e-06	0.00019889
		ENSMUSG00000027187	12360.9	-0.334533	0.0940953	-3.55525	0.000377619	0.00330294
		ENSMUSG00000027194	2046.55	-0.506636	0.0873674	-5.79891	6.67474e-09	7.60237e-07
		ENSMUSG00000027199	224.001	0.55026	0.208445	2.63983	0.0082947	0.0351444
		ENSMUSG00000027215	564.424	0.455486	0.139235	3.27135	0.00107035	0.0074507
		ENSMUSG00000027222	975.501	0.339444	0.127414	2.66411	0.00771923	0.0331922
		ENSMUSG00000027223	359.545	0.471279	0.150672	3.12785	0.00176091	0.0107307
		ENSMUSG00000027236	3821.75	-0.317917	0.0835811	-3.80369	0.000142558	0.00154717
		ENSMUSG00000027259	844.424	-0.327624	0.106507	-3.07609	0.00209737	0.0122742
		ENSMUSG00000027288	53341.9	-0.354401	0.120039	-2.95238	0.00315336	0.016944
		ENSMUSG00000027293	19925.7	-0.461061	0.0775509	-5.94527	2.76004e-09	3.9924e-07
		ENSMUSG00000027303	2706.09	0.262655	0.100969	2.60134	0.00928597	0.0382138
		ENSMUSG00000027309	4528.85	-0.270761	0.0865575	-3.1281	0.00175939	0.0107291
		ENSMUSG00000027312	3109.25	-0.248526	0.0804974	-3.08738	0.00201932	0.0119771
		ENSMUSG00000027314	1692.87	0.592577	0.103616	5.71899	1.07158e-08	1.08395e-06
		ENSMUSG00000027316	308.12	-0.412325	0.131987	-3.12398	0.00178424	0.0108396
		ENSMUSG00000027327	574.948	0.333493	0.11534	2.89139	0.00383544	0.0197647
		ENSMUSG00000027330	222.255	0.735512	0.232966	3.15716	0.00159315	0.00993244
		ENSMUSG00000027332	27438.5	-0.414333	0.117344	-3.53093	0.000414094	0.00353593
		ENSMUSG00000027333	1218.42	0.445271	0.120734	3.68804	0.000225986	0.00224821
		ENSMUSG00000027342	2245.72	0.421429	0.0824238	5.11295	3.17159e-07	1.38184e-05
		ENSMUSG00000027364	1800.61	0.262429	0.103117	2.54498	0.0109285	0.0431563
		ENSMUSG00000027365	3992.99	-0.368635	0.113744	-3.24093	0.0011914	0.00803663
		ENSMUSG00000027371	1477.82	-0.36108	0.111733	-3.23162	0.00123092	0.00821276
		ENSMUSG00000027398	181.678	1.47749	0.323943	4.56096	5.09198e-06	0.000118341
		ENSMUSG00000027405	1521.86	0.260173	0.0940898	2.76516	0.0056895	0.0264232
		ENSMUSG00000027430	674.845	0.301036	0.109821	2.74116	0.00612229	0.0280072
		ENSMUSG00000027435	7268	0.36994	0.121747	3.0386	0.00237683	0.0135321
		ENSMUSG00000027452	26404.5	-0.319578	0.0803855	-3.97556	7.02124e-05	0.000899288
		ENSMUSG00000027474	1400.49	0.248733	0.098549	2.52395	0.0116045	0.0452449
		ENSMUSG00000027488	3524.95	-0.22596	0.080565	-2.8047	0.0050364	0.0242112
		ENSMUSG00000027500	519.594	0.631317	0.168611	3.74422	0.000180956	0.001871
		ENSMUSG00000027502	1920.34	0.224175	0.0688109	3.25785	0.0011226	0.00770689
		ENSMUSG00000027514	101.53	1.10306	0.335003	3.29268	0.000992377	0.00702287
		ENSMUSG00000027533	2739.41	0.813266	0.174958	4.64836	3.34586e-06	8.4024e-05
		ENSMUSG00000027536	2227.39	-0.507591	0.136022	-3.73167	0.000190215	0.00194787
		ENSMUSG00000027552	292.743	0.511786	0.13571	3.77117	0.000162482	0.0017118
		ENSMUSG00000027559	52.1157	3.69695	0.667348	5.53976	3.02888e-08	2.39414e-06
		ENSMUSG00000027562	332.161	0.60373	0.189725	3.18214	0.00146193	0.00937776
		ENSMUSG00000027582	1879.23	-0.243239	0.0818392	-2.97215	0.00295718	0.0160449
		ENSMUSG00000027583	1649.63	0.307175	0.0804734	3.8171	0.00013503	0.00148307
		ENSMUSG00000027593	4498.58	0.24267	0.080033	3.03213	0.00242836	0.0137696
		ENSMUSG00000027599	3185.5	-0.246202	0.0947245	-2.59914	0.00934574	0.0383942
		ENSMUSG00000027602	21533.3	0.204993	0.0606841	3.37804	0.000730047	0.00550868
		ENSMUSG00000027611	60.264	0.875069	0.322089	2.71685	0.00659059	0.0294601
		ENSMUSG00000027613	1552.69	0.430478	0.0919582	4.68124	2.85143e-06	7.36534e-05
		ENSMUSG00000027624	782.85	0.457355	0.14428	3.16991	0.00152488	0.00964045
		ENSMUSG00000027630	1850.76	-0.392979	0.0953607	-4.12098	3.77271e-05	0.000557428
		ENSMUSG00000027634	1170.92	0.274342	0.0862415	3.18109	0.00146724	0.00939645
		ENSMUSG00000027650	1671.03	-0.467555	0.124097	-3.76767	0.00016478	0.00172971
		ENSMUSG00000027651	1904.87	-0.293595	0.0795922	-3.68874	0.000225369	0.00224361
		ENSMUSG00000027652	3181.82	-0.337994	0.0732966	-4.61133	4.00109e-06	9.75983e-05
		ENSMUSG00000027655	1041.48	-0.264976	0.0918262	-2.88562	0.00390639	0.020066
		ENSMUSG00000027663	648.96	-0.508619	0.0930383	-5.46677	4.58306e-08	3.33099e-06
		ENSMUSG00000027668	20766.4	-0.398486	0.0933132	-4.27041	1.95114e-05	0.000332429
		ENSMUSG00000027669	1325.57	0.268919	0.0925942	2.90427	0.00368108	0.0191539
		ENSMUSG00000027679	2824.61	0.316304	0.10268	3.08047	0.00206676	0.012167
		ENSMUSG00000027692	1910.04	-0.421473	0.0984804	-4.27976	1.87092e-05	0.000322945
		ENSMUSG00000027698	10589.8	-0.445462	0.109648	-4.06265	4.85183e-05	0.000671595
		ENSMUSG00000027710	4622.8	-0.345213	0.0928813	-3.71671	0.00020183	0.00204875
		ENSMUSG00000027712	6606.01	0.370519	0.0760748	4.87046	1.11338e-06	3.63545e-05
		ENSMUSG00000027722	525.512	-0.344864	0.133607	-2.58119	0.00984612	0.0398947
		ENSMUSG00000027765	2018.8	-0.729982	0.173808	-4.19994	2.66987e-05	0.000426266
		ENSMUSG00000027774	11051.5	-0.314863	0.122255	-2.57545	0.0100109	0.0404197
		ENSMUSG00000027782	5222.95	-0.390228	0.0809042	-4.82333	1.41181e-06	4.37297e-05
		ENSMUSG00000027784	3484.78	-0.791876	0.117293	-6.75127	1.46554e-11	4.802e-09
		ENSMUSG00000027799	1282.5	-0.358251	0.112927	-3.17242	0.00151175	0.00959941
		ENSMUSG00000027800	4823.09	0.650606	0.144524	4.50171	6.74084e-06	0.000145098
		ENSMUSG00000027805	1982.7	-0.296054	0.0976121	-3.03297	0.0024216	0.0137366
		ENSMUSG00000027809	42094.1	-0.283942	0.112601	-2.52166	0.0116804	0.045481
		ENSMUSG00000027827	64.3947	1.1123	0.319927	3.47672	0.000507586	0.00416462
		ENSMUSG00000027829	2047.95	0.260346	0.0985326	2.64223	0.00823614	0.0349782
		ENSMUSG00000027834	679.82	0.332426	0.11567	2.87392	0.00405409	0.020627
		ENSMUSG00000027835	1282.62	0.331062	0.125099	2.6464	0.00813532	0.0346121
		ENSMUSG00000027840	63.6466	-0.837304	0.296119	-2.8276	0.00468987	0.0230242
		ENSMUSG00000027859	300.678	0.73166	0.161064	4.54265	5.55511e-06	0.000124774
		ENSMUSG00000027860	750.303	0.384645	0.0910392	4.22505	2.38892e-05	0.000387396
		ENSMUSG00000027878	1396.83	-0.366825	0.0991826	-3.69849	0.00021689	0.00216965
		ENSMUSG00000027883	100.626	0.694112	0.248014	2.79869	0.0051311	0.0245624
		ENSMUSG00000027889	447.063	0.338228	0.127697	2.64867	0.0080809	0.0344707
		ENSMUSG00000027894	219.149	-0.729795	0.208184	-3.50553	0.000455707	0.00381942
		ENSMUSG00000027907	1778.86	0.713361	0.140048	5.09368	3.51176e-07	1.4724e-05
		ENSMUSG00000027937	2306.47	0.291078	0.0626134	4.64881	3.3386e-06	8.39874e-05
		ENSMUSG00000027940	3769.22	0.451875	0.114226	3.95596	7.62276e-05	0.000950009
		ENSMUSG00000027953	1093.58	0.352732	0.0883822	3.99098	6.57998e-05	0.000856701
		ENSMUSG00000027956	2001.51	-0.774121	0.171998	-4.50075	6.77134e-06	0.000145352
		ENSMUSG00000027983	535.118	-0.550345	0.125062	-4.40057	1.07967e-05	0.000212771
		ENSMUSG00000027994	129.084	0.67791	0.253767	2.67139	0.00755389	0.0326563
		ENSMUSG00000027995	303.472	0.837358	0.23581	3.55098	0.000383798	0.00334235
		ENSMUSG00000027997	569.228	0.600469	0.125636	4.77943	1.75795e-06	5.09594e-05
		ENSMUSG00000028003	39.1955	1.65113	0.555574	2.97195	0.00295919	0.0160498
		ENSMUSG00000028005	1499.76	0.569313	0.0839	6.7856	1.15602e-11	4.35426e-09
		ENSMUSG00000028015	1272.8	0.410143	0.118062	3.47396	0.000512836	0.00419343
		ENSMUSG00000028024	1007.56	0.483303	0.0986506	4.89914	9.62595e-07	3.2009e-05
		ENSMUSG00000028030	791.606	-0.557933	0.116212	-4.80099	1.5788e-06	4.74788e-05
		ENSMUSG00000028034	3677.93	-0.345087	0.118665	-2.90809	0.00363642	0.0189963
		ENSMUSG00000028035	7253.52	-0.483486	0.178202	-2.71314	0.0066649	0.0297005
		ENSMUSG00000028037	456.304	0.671965	0.188465	3.56547	0.000363204	0.00320644
		ENSMUSG00000028041	4796.52	0.47192	0.114768	4.11196	3.92312e-05	0.00057379
		ENSMUSG00000028048	691.31	0.292883	0.107563	2.72289	0.00647129	0.0290977
		ENSMUSG00000028053	4565.06	-0.325606	0.105797	-3.07766	0.00208634	0.0122281
		ENSMUSG00000028062	1771.38	0.200938	0.0709742	2.83114	0.00463827	0.0228128
		ENSMUSG00000028070	2386.59	0.216934	0.0782253	2.7732	0.00555079	0.0259509
		ENSMUSG00000028073	1499.35	0.32479	0.0976378	3.32648	0.000879508	0.00636104
		ENSMUSG00000028080	2359.46	-0.457094	0.115579	-3.9548	7.65981e-05	0.000950396
		ENSMUSG00000028081	28000.9	0.453092	0.0854923	5.2998	1.1593e-07	6.76179e-06
		ENSMUSG00000028106	1633.52	-0.372983	0.112835	-3.30555	0.000947916	0.00675448
		ENSMUSG00000028114	1275.27	-0.368858	0.12287	-3.00203	0.00268187	0.0149033
		ENSMUSG00000028116	65425.3	0.323822	0.0965631	3.35347	0.000798048	0.00590776
		ENSMUSG00000028127	7587.03	-0.333016	0.0959956	-3.46907	0.000522258	0.00425843
		ENSMUSG00000028136	2335.21	-0.437628	0.0762632	-5.73839	9.55814e-09	9.94665e-07
		ENSMUSG00000028150	3125.95	-0.587269	0.102925	-5.7058	1.15795e-08	1.13944e-06
		ENSMUSG00000028158	489.022	-0.486732	0.162888	-2.98814	0.00280682	0.0153674
		ENSMUSG00000028161	3146.99	-0.202095	0.0811468	-2.49049	0.0127568	0.0485725
		ENSMUSG00000028164	1619.42	-0.324718	0.099253	-3.27162	0.00106933	0.0074472
		ENSMUSG00000028165	3573.82	-0.20024	0.0688048	-2.91026	0.00361132	0.0188925
		ENSMUSG00000028179	159.023	0.624051	0.243215	2.56584	0.0102926	0.0412532
		ENSMUSG00000028188	161.865	-0.665569	0.168699	-3.94531	7.96978e-05	0.000981131
		ENSMUSG00000028191	1143.77	0.267236	0.0841336	3.17633	0.0014915	0.0095042
		ENSMUSG00000028195	2762.55	-0.513631	0.162693	-3.15705	0.00159372	0.00993244
		ENSMUSG00000028234	8710.35	0.515318	0.11902	4.32968	1.49328e-05	0.000273076
		ENSMUSG00000028248	3958.96	-0.313667	0.125191	-2.50551	0.0122274	0.0470208
		ENSMUSG00000028249	6607.63	0.256312	0.0717497	3.57231	0.000353849	0.00314014
		ENSMUSG00000028251	1533.33	-0.237211	0.0927336	-2.55798	0.0105281	0.0419415
		ENSMUSG00000028256	662.157	-0.340862	0.113537	-3.00222	0.00268021	0.0149033
		ENSMUSG00000028268	1154.07	0.732069	0.153916	4.75628	1.97193e-06	5.51722e-05
		ENSMUSG00000028270	1416.67	0.530692	0.144004	3.68527	0.000228464	0.00226818
		ENSMUSG00000028273	39556.9	-0.310683	0.0954481	-3.25499	0.00113396	0.00775907
		ENSMUSG00000028278	8139.36	-0.596955	0.110808	-5.38729	7.1529e-08	4.66066e-06
		ENSMUSG00000028284	4212.68	-0.211107	0.0849735	-2.48439	0.0129773	0.0491918
		ENSMUSG00000028293	953.064	0.241594	0.0883757	2.73372	0.00626238	0.0283789
		ENSMUSG00000028309	2326.98	-0.269901	0.0968452	-2.78693	0.00532102	0.0252273
		ENSMUSG00000028312	283.305	0.463402	0.141924	3.26514	0.00109409	0.00757587
		ENSMUSG00000028328	19221.5	-0.374162	0.0908963	-4.11636	3.849e-05	0.000565236
		ENSMUSG00000028347	439.306	-0.322481	0.126669	-2.54585	0.0109013	0.0430606
		ENSMUSG00000028369	697.353	-0.402309	0.119348	-3.37088	0.000749275	0.00561859
		ENSMUSG00000028382	2526.73	0.344971	0.0754295	4.57343	4.79808e-06	0.000112669
		ENSMUSG00000028383	16609.3	-0.275547	0.106743	-2.5814	0.0098401	0.0398947
		ENSMUSG00000028389	190.381	0.564914	0.206658	2.73357	0.00626524	0.0283829
		ENSMUSG00000028391	926.035	-0.508437	0.192214	-2.64516	0.00816522	0.0347178
		ENSMUSG00000028399	650.507	-0.350939	0.129247	-2.71525	0.0066226	0.0295751
		ENSMUSG00000028402	3845.7	-0.45262	0.106944	-4.23233	2.31287e-05	0.000378457
		ENSMUSG00000028403	1087	-0.475544	0.118952	-3.9978	6.39344e-05	0.000841503
		ENSMUSG00000028413	4632.67	-0.254085	0.10188	-2.49395	0.0126329	0.0482646
		ENSMUSG00000028414	2682.8	-0.574621	0.147025	-3.90831	9.29427e-05	0.00111201
		ENSMUSG00000028416	10581	0.25251	0.0700541	3.6045	0.000312757	0.00286694
		ENSMUSG00000028419	2136.91	0.293951	0.0758601	3.87491	0.000106662	0.00124125
		ENSMUSG00000028420	1439.56	-0.421736	0.103993	-4.05544	5.00402e-05	0.000687399
		ENSMUSG00000028426	6079.89	-0.17643	0.0677366	-2.60465	0.00919671	0.0379436
		ENSMUSG00000028427	1870.87	0.751594	0.142782	5.26393	1.41009e-07	7.69523e-06
		ENSMUSG00000028431	1643.75	-0.377295	0.107764	-3.50112	0.000463311	0.00387611
		ENSMUSG00000028447	1676.71	0.215488	0.0814518	2.64558	0.00815498	0.0346844
		ENSMUSG00000028452	25164.5	-0.269772	0.0925959	-2.91344	0.00357475	0.018735
		ENSMUSG00000028454	1263.74	-0.288041	0.103885	-2.77269	0.00555957	0.0259752
		ENSMUSG00000028456	1444.81	0.615037	0.11297	5.44423	5.20304e-08	3.655e-06
		ENSMUSG00000028459	110.586	0.866464	0.316448	2.73809	0.0061797	0.0281276
		ENSMUSG00000028466	1257.08	0.260598	0.0896437	2.90705	0.0036486	0.0190408
		ENSMUSG00000028470	3365	0.294112	0.0755147	3.89477	9.82932e-05	0.00115972
		ENSMUSG00000028478	3227.59	0.223148	0.0661593	3.3729	0.000743818	0.00558346
		ENSMUSG00000028483	763.756	-0.38264	0.114316	-3.34722	0.000816261	0.0059999
		ENSMUSG00000028495	21232.8	0.370877	0.0858476	4.32017	1.55908e-05	0.000281549
		ENSMUSG00000028496	597.274	0.28657	0.106807	2.68307	0.00729497	0.031822
		ENSMUSG00000028514	6560.38	-0.640175	0.0948619	-6.74849	1.49388e-11	4.802e-09
		ENSMUSG00000028518	8917.36	-0.626835	0.112095	-5.59202	2.24448e-08	1.89862e-06
		ENSMUSG00000028521	596.154	-0.299642	0.105595	-2.83766	0.00454456	0.0224742
		ENSMUSG00000028527	3025.52	-0.496155	0.109264	-4.5409	5.60155e-06	0.000125428
		ENSMUSG00000028551	505.945	0.357317	0.120914	2.95514	0.00312523	0.0168116
		ENSMUSG00000028553	139.493	0.6422	0.20132	3.18995	0.00142296	0.00918887
		ENSMUSG00000028577	3628.86	-0.214367	0.076095	-2.8171	0.00484601	0.0236019
		ENSMUSG00000028580	1631.7	-0.439903	0.0867493	-5.07097	3.95788e-07	1.60366e-05
		ENSMUSG00000028581	1512.08	0.497308	0.178659	2.78357	0.0053765	0.0253656
		ENSMUSG00000028597	375.85	0.640216	0.141755	4.51635	6.29155e-06	0.00013873
		ENSMUSG00000028599	883.707	0.355405	0.137986	2.57566	0.0100049	0.0404197
		ENSMUSG00000028600	648.933	-0.615502	0.145517	-4.22975	2.33949e-05	0.000381519
		ENSMUSG00000028634	360.993	0.425236	0.147634	2.88034	0.00397242	0.0202828
		ENSMUSG00000028639	34817.7	0.27777	0.0973459	2.85344	0.00432493	0.0216427
		ENSMUSG00000028646	2500.89	-0.226295	0.0741241	-3.05292	0.00226624	0.0130654
		ENSMUSG00000028649	19825.1	-0.57959	0.143229	-4.04659	5.19691e-05	0.000709182
		ENSMUSG00000028651	931.525	0.293724	0.0899545	3.26525	0.00109369	0.00757587
		ENSMUSG00000028656	3026.22	0.327373	0.103981	3.1484	0.00164169	0.0101613
		ENSMUSG00000028677	1749.1	0.265192	0.106976	2.47899	0.0131756	0.0497093
		ENSMUSG00000028680	244.486	0.589397	0.179955	3.27524	0.00105572	0.00737373
		ENSMUSG00000028684	3227.17	0.211975	0.0834257	2.54089	0.0110572	0.0435453
		ENSMUSG00000028688	443.608	0.568318	0.130569	4.35264	1.3451e-05	0.000254339
		ENSMUSG00000028690	3287.31	-0.347823	0.0789656	-4.40474	1.0591e-05	0.000209288
		ENSMUSG00000028691	20276.4	0.234101	0.0801354	2.92132	0.00348548	0.0183871
		ENSMUSG00000028692	11434	0.207736	0.0815441	2.54754	0.0108487	0.0429092
		ENSMUSG00000028712	42.1946	-1.33466	0.365657	-3.65004	0.0002622	0.00251007
		ENSMUSG00000028717	421.926	0.439864	0.133257	3.30088	0.000963837	0.00685106
		ENSMUSG00000028737	8540.08	-0.501378	0.104755	-4.7862	1.69965e-06	5.00721e-05
		ENSMUSG00000028776	3845.39	0.502689	0.112495	4.46856	7.87485e-06	0.000164135
		ENSMUSG00000028795	476.874	0.36	0.123162	2.92297	0.0034671	0.0183035
		ENSMUSG00000028797	2932.43	0.31004	0.070108	4.42232	9.76475e-06	0.000195363
		ENSMUSG00000028798	5411.58	0.211262	0.0806758	2.61865	0.00882787	0.0368164
		ENSMUSG00000028800	1283.75	0.367746	0.0921106	3.99244	6.5398e-05	0.000853004
		ENSMUSG00000028809	4079.18	-0.465043	0.106428	-4.36956	1.24497e-05	0.00023758
		ENSMUSG00000028811	1642.18	-0.199986	0.0689188	-2.90176	0.00371074	0.0192525
		ENSMUSG00000028820	4582.12	-0.461449	0.103644	-4.45226	8.49697e-06	0.000174338
		ENSMUSG00000028821	2903.78	0.327124	0.0684327	4.78023	1.75097e-06	5.08796e-05
		ENSMUSG00000028822	2638.73	0.334565	0.0850025	3.93594	8.28728e-05	0.00101263
		ENSMUSG00000028826	1649.56	-0.303788	0.0838634	-3.62241	0.000291867	0.00272202
		ENSMUSG00000028830	2851.21	-0.351076	0.0850951	-4.12569	3.69632e-05	0.000550074
		ENSMUSG00000028838	1499.08	-0.308286	0.12039	-2.56073	0.0104453	0.0417263
		ENSMUSG00000028842	1385.74	-0.596624	0.135331	-4.40862	1.04031e-05	0.000205857
		ENSMUSG00000028843	1028.93	0.530897	0.175039	3.03302	0.00242119	0.0137366
		ENSMUSG00000028848	344.579	0.338812	0.136712	2.47829	0.0132014	0.0497829
		ENSMUSG00000028849	13237.1	-0.276275	0.0724207	-3.81487	0.000136256	0.00149201
		ENSMUSG00000028851	3819.99	0.259981	0.0927304	2.80362	0.00505329	0.0242652
		ENSMUSG00000028868	4083.32	0.357296	0.0874601	4.08525	4.40288e-05	0.000626848
		ENSMUSG00000028874	22.8006	1.47985	0.579722	2.55269	0.0106896	0.0424909
		ENSMUSG00000028890	1161.04	-0.316036	0.0813956	-3.88272	0.000103296	0.00120888
		ENSMUSG00000028894	925.655	0.249086	0.0893509	2.78773	0.00530786	0.0251814
		ENSMUSG00000028898	1172.01	0.459496	0.0948984	4.84197	1.28556e-06	4.07797e-05
		ENSMUSG00000028909	200.453	-0.456605	0.183228	-2.492	0.0127027	0.0484429
		ENSMUSG00000028919	2803.35	-0.428996	0.0889048	-4.82534	1.39768e-06	4.34783e-05
		ENSMUSG00000028923	966.801	0.543243	0.136343	3.98439	6.76538e-05	0.000876162
		ENSMUSG00000028927	104.65	0.590821	0.236341	2.49987	0.0124238	0.0476716
		ENSMUSG00000028936	8211.82	0.28772	0.0859583	3.34721	0.000816301	0.0059999
		ENSMUSG00000028944	1255.33	-0.334877	0.0964968	-3.47034	0.000519804	0.00424321
		ENSMUSG00000028970	606.729	0.486788	0.123851	3.93042	8.47965e-05	0.00103074
		ENSMUSG00000028977	1961.93	-0.567074	0.119208	-4.75703	1.96459e-06	5.51722e-05
		ENSMUSG00000028978	2787.22	0.387797	0.106847	3.62947	0.000284007	0.00266839
		ENSMUSG00000028986	2652.39	-0.339102	0.113819	-2.97931	0.00288901	0.01574
		ENSMUSG00000028988	2151.26	0.553043	0.108272	5.10788	3.25787e-07	1.40253e-05
		ENSMUSG00000028989	98.3358	-0.702667	0.27361	-2.56813	0.0102248	0.0410612
		ENSMUSG00000028990	1952.24	-0.26834	0.100453	-2.6713	0.00755573	0.0326563
		ENSMUSG00000028991	3377.47	-0.344605	0.108921	-3.16381	0.00155718	0.00975934
		ENSMUSG00000028996	1063.78	0.807507	0.20765	3.88878	0.000100748	0.00118289
		ENSMUSG00000028998	3645.41	0.352563	0.10286	3.4276	0.000608934	0.00479229
		ENSMUSG00000028999	801.753	-0.270132	0.0982701	-2.74887	0.00598003	0.0274432
		ENSMUSG00000029004	3165.37	-0.278906	0.0822145	-3.39242	0.000692779	0.00528257
		ENSMUSG00000029020	48533.1	-0.259426	0.0773836	-3.35246	0.000800955	0.00591608
		ENSMUSG00000029022	663.487	0.38332	0.125738	3.04856	0.00229938	0.0131986
		ENSMUSG00000029038	2019.32	0.330017	0.0845108	3.90503	9.4212e-05	0.00112003
		ENSMUSG00000029063	2460.3	0.324871	0.101134	3.2123	0.00131677	0.00866168
		ENSMUSG00000029064	6908.48	0.238837	0.0760492	3.14056	0.00168628	0.0103673
		ENSMUSG00000029066	2332.4	0.259981	0.096338	2.69863	0.00696247	0.0307143
		ENSMUSG00000029070	1820.11	0.410026	0.113951	3.59828	0.000320328	0.00291052
		ENSMUSG00000029076	5886.49	0.237408	0.0680469	3.48888	0.000485043	0.00401752
		ENSMUSG00000029084	944.019	0.508609	0.135591	3.75105	0.000176096	0.00182859
		ENSMUSG00000029089	329.759	-0.397253	0.152104	-2.61172	0.00900887	0.0374248
		ENSMUSG00000029090	1431.86	-0.222378	0.0893538	-2.48874	0.0128198	0.0487225
		ENSMUSG00000029095	1019.52	-0.25189	0.0980044	-2.57019	0.0101643	0.0408695
		ENSMUSG00000029104	2014.45	-0.354488	0.103647	-3.42015	0.00062586	0.00489619
		ENSMUSG00000029108	6397.11	-0.515364	0.143998	-3.57896	0.000344967	0.0030781
		ENSMUSG00000029110	2230.42	0.221732	0.0766792	2.89168	0.00383189	0.0197535
		ENSMUSG00000029126	258.709	0.465039	0.146764	3.16862	0.00153167	0.00967252
		ENSMUSG00000029156	8767.09	-0.36656	0.111144	-3.29807	0.000973506	0.00690785
		ENSMUSG00000029171	434.923	0.364221	0.140951	2.58403	0.00976539	0.0396788
		ENSMUSG00000029174	972.513	0.274092	0.10041	2.72973	0.0063387	0.0286529
		ENSMUSG00000029179	575.279	-0.309189	0.119482	-2.58773	0.00966094	0.0393539
		ENSMUSG00000029190	9115.09	-0.485809	0.104155	-4.6643	3.09676e-06	7.88638e-05
		ENSMUSG00000029191	2342.85	-0.205462	0.0786349	-2.61287	0.00897865	0.0373207
		ENSMUSG00000029202	3723.95	-0.224438	0.0837366	-2.68029	0.0073558	0.0320391
		ENSMUSG00000029208	1944.72	-0.506854	0.176351	-2.87412	0.00405159	0.0206255
		ENSMUSG00000029221	8214.1	-0.280339	0.0975175	-2.87476	0.00404335	0.0206013
		ENSMUSG00000029223	490.288	0.560027	0.201752	2.77581	0.00550641	0.0258102
		ENSMUSG00000029227	1718.31	-0.255327	0.0694136	-3.67835	0.000234749	0.0023084
		ENSMUSG00000029229	760.389	0.311031	0.103731	2.99843	0.00271378	0.0150388
		ENSMUSG00000029234	1248.84	0.299249	0.104191	2.87213	0.0040772	0.0207154
		ENSMUSG00000029245	51.0661	-1.01646	0.309507	-3.28413	0.00102299	0.00719727
		ENSMUSG00000029249	945.306	-0.383457	0.100364	-3.82067	0.000133088	0.00146397
		ENSMUSG00000029263	1184.12	-0.438444	0.106914	-4.1009	4.11552e-05	0.000597373
		ENSMUSG00000029265	1446.39	-0.213154	0.0821925	-2.59335	0.00950461	0.0388483
		ENSMUSG00000029267	742.941	0.267612	0.0963473	2.77757	0.00547664	0.0256891
		ENSMUSG00000029291	1109.33	-0.411658	0.101419	-4.05897	4.92897e-05	0.000679024
		ENSMUSG00000029298	2264.37	0.515046	0.11557	4.45659	8.32745e-06	0.00017159
		ENSMUSG00000029309	24475.3	0.526089	0.072731	7.23335	4.71215e-13	3.40806e-10
		ENSMUSG00000029313	3785.17	-0.428864	0.0767143	-5.5904	2.26542e-08	1.9052e-06
		ENSMUSG00000029322	26.3126	2.53744	0.689152	3.68197	0.000231438	0.00228828
		ENSMUSG00000029330	231.214	-0.634673	0.216204	-2.93552	0.00332985	0.0177082
		ENSMUSG00000029338	8022.19	-0.285821	0.112897	-2.53168	0.0113516	0.0444268
		ENSMUSG00000029359	4100.73	-0.205512	0.0806733	-2.54746	0.0108512	0.0429092
		ENSMUSG00000029372	98.2635	1.99963	0.799805	2.50015	0.0124141	0.0476692
		ENSMUSG00000029373	822.583	1.07211	0.214574	4.99645	5.83949e-07	2.17702e-05
		ENSMUSG00000029380	90.5485	0.897902	0.308259	2.91282	0.00358179	0.0187584
		ENSMUSG00000029381	1938.56	-0.487422	0.0786377	-6.19833	5.70663e-10	1.05829e-07
		ENSMUSG00000029385	1445.61	0.238575	0.0929914	2.56555	0.0103011	0.0412644
		ENSMUSG00000029404	1130.67	0.193249	0.0755153	2.55908	0.0104951	0.0418674
		ENSMUSG00000029407	3232.15	-0.248449	0.0831505	-2.98795	0.00280857	0.0153712
		ENSMUSG00000029415	1046.97	-0.289158	0.09071	-3.18772	0.00143399	0.00923127
		ENSMUSG00000029416	713.872	-0.290872	0.0986386	-2.94887	0.00318939	0.0170995
		ENSMUSG00000029417	535.523	0.768895	0.216569	3.55034	0.000384736	0.00334448
		ENSMUSG00000029420	57.5251	-0.771266	0.304543	-2.53254	0.0113241	0.044355
		ENSMUSG00000029428	1248.01	0.31662	0.105749	2.99406	0.00275289	0.0151582
		ENSMUSG00000029432	41524.7	-0.311279	0.0590668	-5.26996	1.36454e-07	7.59155e-06
		ENSMUSG00000029434	1965.8	-0.305911	0.0804648	-3.8018	0.000143646	0.00155644
		ENSMUSG00000029456	343.14	-0.450942	0.148407	-3.03856	0.00237712	0.0135321
		ENSMUSG00000029463	376.404	0.331346	0.132937	2.4925	0.0126847	0.0484248
		ENSMUSG00000029465	3691.04	0.218798	0.0870758	2.51273	0.0119801	0.0463845
		ENSMUSG00000029467	732140	-0.375365	0.110763	-3.38892	0.000701683	0.00532521
		ENSMUSG00000029472	12726.9	0.197485	0.0548789	3.59856	0.000319988	0.00290926
		ENSMUSG00000029478	3518.69	-0.364076	0.110154	-3.30516	0.000949223	0.00676047
		ENSMUSG00000029480	863.567	-0.34207	0.105706	-3.23606	0.0012119	0.00813462
		ENSMUSG00000029484	2038.23	0.537188	0.105137	5.1094	3.23176e-07	1.39853e-05
		ENSMUSG00000029501	1802.16	-0.343677	0.0954402	-3.60097	0.000317033	0.0028933
		ENSMUSG00000029502	4402.61	-0.391263	0.0708551	-5.52202	3.35119e-08	2.60835e-06
		ENSMUSG00000029512	5043.13	-0.260302	0.0868729	-2.99636	0.00273227	0.0151021
		ENSMUSG00000029513	1943.15	0.304318	0.115669	2.63095	0.00851474	0.0357961
		ENSMUSG00000029545	13367	-0.328035	0.112356	-2.91961	0.00350466	0.0184748
		ENSMUSG00000029547	2102.99	-0.326626	0.0826035	-3.95415	7.68084e-05	0.000952042
		ENSMUSG00000029552	295.995	0.429576	0.152552	2.81593	0.00486367	0.0236463
		ENSMUSG00000029561	790.542	0.665759	0.182968	3.63867	0.00027405	0.00259603
		ENSMUSG00000029571	9319.18	-0.283192	0.0929234	-3.04759	0.00230687	0.0132206
		ENSMUSG00000029575	2436.36	-0.375179	0.116981	-3.20717	0.00134047	0.00879358
		ENSMUSG00000029577	8340.56	-0.34605	0.0919752	-3.76243	0.000168271	0.00176053
		ENSMUSG00000029580	16073.3	0.554458	0.123036	4.50647	6.59145e-06	0.000143377
		ENSMUSG00000029581	1701.05	0.616711	0.17704	3.48346	0.000494978	0.00407273
		ENSMUSG00000029614	19622.7	0.342905	0.0738372	4.64407	3.41619e-06	8.54935e-05
		ENSMUSG00000029622	3493.43	0.619887	0.151937	4.07989	4.50569e-05	0.000636473
		ENSMUSG00000029624	1503.42	-0.421672	0.125552	-3.35853	0.000783582	0.00580959
		ENSMUSG00000029625	549.133	0.357639	0.110199	3.24541	0.00117282	0.00792747
		ENSMUSG00000029632	50766.1	0.351458	0.0813022	4.32286	1.54019e-05	0.000279534
		ENSMUSG00000029635	981.395	-0.373215	0.0985084	-3.78866	0.000151461	0.00162288
		ENSMUSG00000029659	1509.75	0.453924	0.134575	3.37303	0.000743464	0.00558346
		ENSMUSG00000029669	1983.54	0.248476	0.0896437	2.77182	0.00557438	0.0260265
		ENSMUSG00000029673	1316.15	-0.606702	0.165195	-3.67264	0.000240059	0.00234466
		ENSMUSG00000029683	33500.7	-0.699346	0.145573	-4.8041	1.55447e-06	4.70406e-05
		ENSMUSG00000029684	1858.4	-0.286241	0.0865331	-3.30788	0.000940055	0.00670508
		ENSMUSG00000029685	4367.38	-0.449721	0.122107	-3.68301	0.000230493	0.00228205
		ENSMUSG00000029701	2038.25	-0.346139	0.106227	-3.2585	0.00112003	0.00769658
		ENSMUSG00000029705	4282.66	-0.224426	0.0783243	-2.86535	0.00416553	0.0210532
		ENSMUSG00000029710	3667.51	0.475019	0.106922	4.44266	8.88533e-06	0.000181023
		ENSMUSG00000029713	6727.63	0.220721	0.080986	2.72542	0.00642197	0.0289209
		ENSMUSG00000029718	2562.06	0.463763	0.111629	4.15451	3.25991e-05	0.000495842
		ENSMUSG00000029723	7427.13	-0.230876	0.0858193	-2.69025	0.00713975	0.0312675
		ENSMUSG00000029726	1490.77	0.202214	0.0759594	2.66214	0.00776462	0.0333478
		ENSMUSG00000029729	1266.97	-0.338374	0.0850863	-3.97683	6.98387e-05	0.000895583
		ENSMUSG00000029730	626.148	0.366532	0.13372	2.74104	0.00612457	0.0280088
		ENSMUSG00000029752	170.177	0.638595	0.243057	2.62735	0.00860529	0.0360589
		ENSMUSG00000029761	4032.37	0.262654	0.0766189	3.42806	0.000607914	0.00479229
		ENSMUSG00000029762	211.811	0.681023	0.195204	3.48877	0.00048524	0.00401752
		ENSMUSG00000029765	1226.29	-0.342165	0.130888	-2.61418	0.00894426	0.0372099
		ENSMUSG00000029771	271.601	0.551669	0.201895	2.73246	0.00628633	0.0284518
		ENSMUSG00000029775	3431.86	-0.315553	0.0794056	-3.97394	7.06936e-05	0.000901749
		ENSMUSG00000029776	16282.7	-0.266212	0.0698328	-3.81213	0.000137776	0.00150306
		ENSMUSG00000029804	3027.98	-0.480628	0.11269	-4.26505	1.99857e-05	0.000339311
		ENSMUSG00000029810	1705.77	0.368056	0.128655	2.8608	0.00422578	0.0212834
		ENSMUSG00000029817	2682.39	-0.305295	0.122867	-2.48476	0.0129638	0.0491537
		ENSMUSG00000029822	1462.24	-0.460569	0.0927488	-4.96576	6.84319e-07	2.43211e-05
		ENSMUSG00000029823	6909.36	-0.471722	0.115035	-4.10069	4.11926e-05	0.000597373
		ENSMUSG00000029826	1311.28	0.251701	0.0979753	2.56902	0.0101986	0.0409672
		ENSMUSG00000029851	209.979	0.487916	0.182587	2.67224	0.00753474	0.0326024
		ENSMUSG00000029862	415.707	-0.81819	0.232237	-3.52307	0.000426572	0.00362323
		ENSMUSG00000029863	801.364	0.298687	0.0855411	3.49174	0.000479885	0.00398481
		ENSMUSG00000029915	112.145	0.934463	0.271271	3.44475	0.000571584	0.00455786
		ENSMUSG00000029918	3829.89	0.277292	0.0779333	3.55806	0.000373604	0.00327924
		ENSMUSG00000029923	23.4211	2.00087	0.530412	3.7723	0.000161747	0.0017053
		ENSMUSG00000029924	1116.71	0.259339	0.0850555	3.04906	0.00229561	0.0131822
		ENSMUSG00000029992	1635.19	-0.404334	0.0933707	-4.33042	1.48826e-05	0.000272502
		ENSMUSG00000029998	5613.35	-0.270514	0.07089	-3.81597	0.000135648	0.00148774
		ENSMUSG00000030002	3565.63	-0.376128	0.0886942	-4.24073	2.22798e-05	0.000368318
		ENSMUSG00000030020	593.66	0.318773	0.127242	2.50525	0.0122365	0.0470374
		ENSMUSG00000030029	2366.28	-0.229308	0.0737011	-3.11132	0.00186254	0.0112257
		ENSMUSG00000030035	2802.13	0.288219	0.090845	3.17265	0.00151057	0.00959941
		ENSMUSG00000030042	1373.3	0.207782	0.0788039	2.63669	0.00837187	0.0353523
		ENSMUSG00000030047	326.404	0.541361	0.15624	3.46492	0.000530385	0.0043077
		ENSMUSG00000030055	952.226	0.334506	0.132816	2.51857	0.0117833	0.0457941
		ENSMUSG00000030064	1127.83	0.404086	0.125071	3.23086	0.00123417	0.00822684
		ENSMUSG00000030067	1066.57	0.243461	0.0947528	2.56943	0.0101865	0.040938
		ENSMUSG00000030087	3368.43	-0.428716	0.100085	-4.28351	1.83968e-05	0.000319843
		ENSMUSG00000030088	292.988	1.21122	0.215571	5.61866	1.92445e-08	1.70957e-06
		ENSMUSG00000030098	1290.93	-0.488686	0.124165	-3.93579	8.29221e-05	0.00101263
		ENSMUSG00000030105	5176.39	-0.306737	0.0670256	-4.57641	4.73028e-06	0.000111439
		ENSMUSG00000030107	340.288	0.785332	0.18843	4.16776	3.07604e-05	0.000471344
		ENSMUSG00000030122	3740.44	0.479719	0.133276	3.59944	0.000318906	0.00290672
		ENSMUSG00000030126	2580.76	-0.39002	0.0843148	-4.62576	3.73235e-06	9.22879e-05
		ENSMUSG00000030138	1775.05	-0.288317	0.100936	-2.85643	0.00428441	0.0215038
		ENSMUSG00000030148	175.095	0.668585	0.239425	2.79246	0.00523083	0.0249141
		ENSMUSG00000030168	6327.17	-0.392163	0.0913322	-4.29381	1.75634e-05	0.000308318
		ENSMUSG00000030172	2936.59	-0.347064	0.109025	-3.18335	0.00145582	0.00935097
		ENSMUSG00000030180	2550.87	-0.279408	0.110771	-2.52239	0.0116561	0.0454096
		ENSMUSG00000030189	6914.65	0.26135	0.0928775	2.81393	0.00489406	0.023732
		ENSMUSG00000030201	4554.13	-0.205688	0.0754098	-2.7276	0.00637967	0.0287828
		ENSMUSG00000030203	1724.67	-0.446091	0.157767	-2.82753	0.00469079	0.0230242
		ENSMUSG00000030213	3819.07	-0.392549	0.0837733	-4.68584	2.7881e-06	7.24806e-05
		ENSMUSG00000030216	2437.37	-0.190065	0.0652035	-2.91496	0.00355739	0.0186847
		ENSMUSG00000030218	5845.2	0.615263	0.16827	3.6564	0.000255783	0.0024666
		ENSMUSG00000030220	1272.47	0.676185	0.154056	4.38922	1.13758e-05	0.000221692
		ENSMUSG00000030222	246.94	0.545257	0.190842	2.85711	0.0042752	0.021465
		ENSMUSG00000030231	1792.44	-0.331611	0.0814958	-4.06905	4.72046e-05	0.000659724
		ENSMUSG00000030247	3130.01	0.661282	0.107908	6.12818	8.88882e-10	1.62756e-07
		ENSMUSG00000030249	20400.6	-0.553661	0.107231	-5.16326	2.42684e-07	1.09828e-05
		ENSMUSG00000030255	13482.1	-0.34151	0.0702666	-4.86021	1.1726e-06	3.78609e-05
		ENSMUSG00000030259	2272.58	-0.351417	0.113376	-3.09957	0.00193803	0.0116081
		ENSMUSG00000030269	1259.72	0.3151	0.0929093	3.39148	0.000695174	0.00528745
		ENSMUSG00000030275	3539.61	-0.310971	0.0651453	-4.7735	1.81047e-06	5.21683e-05
		ENSMUSG00000030279	1162.91	-0.445584	0.101694	-4.38162	1.17799e-05	0.000227499
		ENSMUSG00000030291	1482.7	0.437152	0.113855	3.83955	0.000123262	0.00138108
		ENSMUSG00000030298	3447.24	0.224184	0.0818345	2.73947	0.00615376	0.0280714
		ENSMUSG00000030303	50.4747	-0.985306	0.286474	-3.43942	0.000582959	0.0046307
		ENSMUSG00000030306	8430.78	-0.351236	0.0915327	-3.83727	0.000124409	0.00138725
		ENSMUSG00000030319	5979.08	-0.538834	0.111462	-4.83426	1.33642e-06	4.21162e-05
		ENSMUSG00000030329	45.2945	0.844377	0.327567	2.57773	0.00994526	0.0402513
		ENSMUSG00000030339	1558.81	0.299903	0.11462	2.6165	0.00888376	0.0370007
		ENSMUSG00000030341	2360.18	0.357245	0.12651	2.82385	0.00474503	0.0232274
		ENSMUSG00000030342	2132.83	0.685213	0.139483	4.91253	8.99092e-07	3.03155e-05
		ENSMUSG00000030353	254.276	0.432575	0.172379	2.50943	0.0120925	0.0466926
		ENSMUSG00000030376	45.519	-0.961129	0.348594	-2.75716	0.00583057	0.0269282
		ENSMUSG00000030378	88.5991	-0.726863	0.263652	-2.7569	0.00583525	0.0269377
		ENSMUSG00000030417	3604.5	0.376155	0.0796714	4.72133	2.34305e-06	6.25319e-05
		ENSMUSG00000030431	97.056	0.808755	0.247142	3.27243	0.00106628	0.00742955
		ENSMUSG00000030432	11372	0.39247	0.111905	3.50718	0.000452883	0.00380206
		ENSMUSG00000030451	4737.48	-0.364907	0.101319	-3.60157	0.000316299	0.00289025
		ENSMUSG00000030452	1803.72	-0.260902	0.0916042	-2.84814	0.00439751	0.0219193
		ENSMUSG00000030469	508.981	0.308802	0.117889	2.61943	0.00880757	0.0367474
		ENSMUSG00000030494	331.689	0.477356	0.15493	3.08112	0.00206226	0.0121608
		ENSMUSG00000030500	29.9708	-1.34262	0.419331	-3.20181	0.00136569	0.00891057
		ENSMUSG00000030554	756.044	0.321334	0.102068	3.14823	0.00164261	0.0101627
		ENSMUSG00000030557	10201.6	-0.334869	0.0913115	-3.66733	0.000245096	0.00237996
		ENSMUSG00000030579	944.325	0.740115	0.19458	3.80365	0.000142577	0.00154717
		ENSMUSG00000030590	684.718	0.380563	0.0967938	3.93169	8.43518e-05	0.0010262
		ENSMUSG00000030630	1078.06	0.442424	0.154636	2.86106	0.00422223	0.0212803
		ENSMUSG00000030643	523.883	-0.703271	0.223269	-3.14988	0.00163335	0.0101222
		ENSMUSG00000030654	1866.63	0.292702	0.0895647	3.26805	0.00108293	0.007513
		ENSMUSG00000030655	7578.25	-0.477599	0.133357	-3.58137	0.000341797	0.00306136
		ENSMUSG00000030682	2203.9	0.379671	0.0777391	4.88391	1.04004e-06	3.42691e-05
		ENSMUSG00000030691	1234.9	-0.230358	0.0901515	-2.55523	0.0106119	0.0422403
		ENSMUSG00000030697	1648.98	0.289429	0.108763	2.66109	0.00778879	0.0334134
		ENSMUSG00000030701	137.314	0.748682	0.24291	3.08213	0.00205522	0.0121372
		ENSMUSG00000030707	646.473	0.724994	0.218611	3.31636	0.000911968	0.00655321
		ENSMUSG00000030717	342.384	0.485179	0.178706	2.71495	0.00662852	0.029584
		ENSMUSG00000030733	3370.32	-0.225873	0.0822026	-2.74776	0.00600046	0.0275283
		ENSMUSG00000030737	1668.01	0.412945	0.140345	2.94235	0.00325727	0.0173797
		ENSMUSG00000030739	4725.48	-0.476902	0.0918459	-5.19242	2.0758e-07	1.00039e-05
		ENSMUSG00000030744	22781.7	0.435327	0.0876646	4.96582	6.84114e-07	2.43211e-05
		ENSMUSG00000030747	17027.4	-0.420836	0.0949115	-4.43398	9.25087e-06	0.000187539
		ENSMUSG00000030748	1089.84	0.441917	0.111724	3.95544	7.63928e-05	0.000950147
		ENSMUSG00000030750	1582.99	0.291021	0.107283	2.71266	0.00667458	0.0297162
		ENSMUSG00000030753	7568.56	-0.218972	0.0710326	-3.0827	0.0020513	0.0121308
		ENSMUSG00000030782	935.16	0.39573	0.120554	3.28259	0.0010286	0.00722615
		ENSMUSG00000030785	74495.2	0.419622	0.0864416	4.8544	1.20749e-06	3.86424e-05
		ENSMUSG00000030788	2267.55	-0.198583	0.0768886	-2.58274	0.00980204	0.039783
		ENSMUSG00000030798	158.496	0.622994	0.220657	2.82337	0.00475223	0.0232547
		ENSMUSG00000030805	3268.89	0.197917	0.0581243	3.40506	0.000661485	0.00509498
		ENSMUSG00000030814	1058.39	0.437094	0.107504	4.06585	4.78581e-05	0.000665003
		ENSMUSG00000030816	2567.66	-0.232523	0.0647331	-3.59202	0.000328121	0.00296642
		ENSMUSG00000030844	397.557	0.688607	0.191746	3.59124	0.000329107	0.00297347
		ENSMUSG00000030846	2464.76	-0.270438	0.0865076	-3.12618	0.00177096	0.0107725
		ENSMUSG00000030847	8940.29	-0.565362	0.123363	-4.58293	4.58514e-06	0.000109086
		ENSMUSG00000030852	18983.6	-0.845851	0.171623	-4.92855	8.28426e-07	2.8329e-05
		ENSMUSG00000030872	2160.96	-0.275113	0.0861315	-3.19411	0.00140264	0.00909421
		ENSMUSG00000030878	812.186	0.647087	0.149799	4.3197	1.56245e-05	0.000281805
		ENSMUSG00000030890	4649	0.203919	0.0730904	2.78995	0.00527159	0.025061
		ENSMUSG00000030921	939.029	0.520187	0.101542	5.12288	3.00901e-07	1.31895e-05
		ENSMUSG00000030966	590.225	0.671131	0.126206	5.31774	1.05062e-07	6.22837e-06
		ENSMUSG00000030972	225.147	-1.09388	0.293295	-3.72961	0.000191777	0.00195631
		ENSMUSG00000030980	1364.48	0.243251	0.0750774	3.24	0.0011953	0.0080527
		ENSMUSG00000031010	10259.8	-0.463341	0.112657	-4.11286	3.90788e-05	0.000572141
		ENSMUSG00000031015	1201.45	0.329692	0.0851003	3.87416	0.000106993	0.00124357
		ENSMUSG00000031023	436.216	0.327044	0.124577	2.62524	0.00865883	0.0362204
		ENSMUSG00000031059	21753.3	0.291847	0.0810377	3.60137	0.000316539	0.00289062
		ENSMUSG00000031066	350.151	-0.431596	0.168841	-2.55622	0.0105815	0.0421309
		ENSMUSG00000031068	8476.09	0.332648	0.0834882	3.98437	6.7658e-05	0.000876162
		ENSMUSG00000031070	158.932	0.662194	0.190523	3.47566	0.000509591	0.00417161
		ENSMUSG00000031075	587.783	0.372487	0.145203	2.56528	0.0103093	0.0412745
		ENSMUSG00000031119	874.119	-0.31929	0.0884807	-3.60858	0.000307873	0.00283835
		ENSMUSG00000031133	4234.93	-0.376831	0.115847	-3.25283	0.00114262	0.00779626
		ENSMUSG00000031137	2524.5	-0.378671	0.0959734	-3.94558	7.96055e-05	0.000980829
		ENSMUSG00000031149	285.59	0.583051	0.161278	3.61519	0.000300128	0.00278828
		ENSMUSG00000031155	184.975	-0.455402	0.156244	-2.91468	0.00356056	0.0186946
		ENSMUSG00000031157	868.839	0.268452	0.0981857	2.73413	0.00625453	0.0283659
		ENSMUSG00000031161	857.526	-0.255278	0.10262	-2.4876	0.0128608	0.04884
		ENSMUSG00000031166	3320.16	-0.216434	0.0820039	-2.63932	0.0083073	0.0351771
		ENSMUSG00000031168	664.438	0.38101	0.109919	3.46628	0.000527707	0.00429077
		ENSMUSG00000031169	143.929	1.69534	0.329741	5.14142	2.72677e-07	1.2099e-05
		ENSMUSG00000031176	3485.33	0.238571	0.0845742	2.82085	0.00478966	0.0233825
		ENSMUSG00000031207	11303	0.198679	0.0708654	2.80362	0.00505331	0.0242652
		ENSMUSG00000031217	1264.94	0.376005	0.104356	3.60311	0.000314437	0.00288051
		ENSMUSG00000031231	43490.3	0.424883	0.0893187	4.75693	1.96556e-06	5.51722e-05
		ENSMUSG00000031239	824.947	0.458775	0.156894	2.9241	0.00345453	0.0182571
		ENSMUSG00000031246	2264.91	0.362984	0.0889421	4.08113	4.48176e-05	0.000635575
		ENSMUSG00000031258	89.1487	-0.746081	0.287153	-2.5982	0.00937138	0.0384668
		ENSMUSG00000031292	535.501	-0.40274	0.144572	-2.78574	0.00534061	0.0252953
		ENSMUSG00000031295	975.914	-0.368259	0.116613	-3.15796	0.00158877	0.00991865
		ENSMUSG00000031304	648.49	0.728066	0.177867	4.09332	4.25244e-05	0.000612665
		ENSMUSG00000031320	27885.6	0.496792	0.0945651	5.25344	1.49285e-07	7.9099e-06
		ENSMUSG00000031333	2871.55	-0.352875	0.12764	-2.76462	0.0056989	0.0264552
		ENSMUSG00000031353	9497.41	-0.22458	0.0880271	-2.55126	0.0107335	0.0426186
		ENSMUSG00000031374	13.9489	-1.78489	0.621992	-2.86963	0.00410956	0.0208359
		ENSMUSG00000031386	3697.25	-0.262665	0.0797788	-3.29242	0.000993296	0.00702341
		ENSMUSG00000031393	3047.25	-0.294181	0.109322	-2.69097	0.00712447	0.0312598
		ENSMUSG00000031400	501.53	0.565093	0.133757	4.22477	2.3919e-05	0.000387445
		ENSMUSG00000031402	840.564	0.534579	0.148201	3.60712	0.000309613	0.00284895
		ENSMUSG00000031438	4079.7	-0.237064	0.0841299	-2.81783	0.00483494	0.0235559
		ENSMUSG00000031441	7862.66	-0.342847	0.0821397	-4.17395	2.99369e-05	0.000460727
		ENSMUSG00000031446	6637.45	-0.332088	0.0752799	-4.41137	1.02718e-05	0.000203815
		ENSMUSG00000031461	77295.7	-0.54084	0.138957	-3.89214	9.93652e-05	0.0011695
		ENSMUSG00000031482	903.541	-0.367537	0.122493	-3.00047	0.00269567	0.0149627
		ENSMUSG00000031490	3140.71	0.230749	0.0915352	2.52087	0.0117064	0.0455687
		ENSMUSG00000031508	2292.63	-0.35146	0.0767944	-4.57664	4.72511e-06	0.000111439
		ENSMUSG00000031511	6515.31	-0.274347	0.074481	-3.68345	0.000230099	0.00227971
		ENSMUSG00000031519	1457.33	0.327694	0.106115	3.0881	0.00201441	0.0119618
		ENSMUSG00000031520	436.788	0.542789	0.156677	3.46439	0.000531437	0.00431383
		ENSMUSG00000031529	3780.67	-0.372417	0.0938076	-3.97001	7.18693e-05	0.000909527
		ENSMUSG00000031538	1514.22	0.502927	0.116254	4.32609	1.51777e-05	0.000276854
		ENSMUSG00000031539	384.559	0.385586	0.138855	2.77689	0.0054881	0.0257327
		ENSMUSG00000031543	19735.3	-0.28653	0.0813634	-3.52161	0.000428934	0.00363902
		ENSMUSG00000031546	744.094	0.347394	0.104585	3.32166	0.00089483	0.00645572
		ENSMUSG00000031556	2009.72	0.229625	0.0835025	2.74992	0.00596096	0.0273644
		ENSMUSG00000031568	2038.58	-0.294388	0.0882278	-3.33668	0.000847852	0.00617843
		ENSMUSG00000031586	6801.14	-0.245295	0.0684823	-3.58187	0.000341141	0.00305927
		ENSMUSG00000031591	2742.27	0.284034	0.087232	3.25608	0.00112963	0.00774414
		ENSMUSG00000031592	3747.85	-0.437775	0.0990828	-4.41828	9.94916e-06	0.000198777
		ENSMUSG00000031609	397.254	0.433703	0.156685	2.768	0.00564013	0.0262499
		ENSMUSG00000031613	548.369	0.439714	0.145873	3.01437	0.00257512	0.0144153
		ENSMUSG00000031616	1780.65	-0.460694	0.137387	-3.35325	0.000798688	0.00590948
		ENSMUSG00000031626	17511	-0.679436	0.14968	-4.53925	5.64545e-06	0.000126216
		ENSMUSG00000031628	253.197	0.752704	0.179582	4.19142	2.77219e-05	0.000439209
		ENSMUSG00000031644	1247.36	-0.317814	0.109634	-2.89886	0.00374516	0.0193755
		ENSMUSG00000031647	868.345	-0.360092	0.138792	-2.59448	0.00947341	0.0387427
		ENSMUSG00000031657	1936.03	-0.295678	0.0970252	-3.04744	0.00230799	0.0132218
		ENSMUSG00000031660	4558.3	-0.277848	0.0672206	-4.13338	3.57469e-05	0.000535833
		ENSMUSG00000031662	98.3455	0.606988	0.243599	2.49176	0.0127113	0.0484504
		ENSMUSG00000031666	3138.01	-0.255025	0.0839693	-3.03713	0.00238846	0.0135913
		ENSMUSG00000031672	49632.1	-0.351083	0.083844	-4.18733	2.8225e-05	0.000443777
		ENSMUSG00000031681	762.692	0.257672	0.0948342	2.71708	0.0065861	0.0294491
		ENSMUSG00000031697	355.345	0.370481	0.126475	2.92929	0.00339741	0.0179881
		ENSMUSG00000031698	43471.3	-0.355348	0.0970431	-3.66175	0.000250497	0.00242209
		ENSMUSG00000031700	2229.9	-0.314397	0.110453	-2.84643	0.00442129	0.0220023
		ENSMUSG00000031701	14473.8	-0.272582	0.0837583	-3.25439	0.00113636	0.00776449
		ENSMUSG00000031712	1993.65	0.400202	0.123046	3.25246	0.00114409	0.0078026
		ENSMUSG00000031722	39.9676	2.23525	0.594979	3.75685	0.000172063	0.00179574
		ENSMUSG00000031748	1304.45	-0.358324	0.110566	-3.24081	0.00119189	0.00803663
		ENSMUSG00000031750	233.387	0.681373	0.188887	3.6073	0.000309397	0.00284877
		ENSMUSG00000031751	8361.1	-0.146698	0.0562331	-2.60874	0.0090875	0.0376542
		ENSMUSG00000031770	11376.7	-0.425877	0.138266	-3.08012	0.0020692	0.012167
		ENSMUSG00000031781	3186.95	-0.327318	0.114664	-2.85458	0.00430943	0.0215844
		ENSMUSG00000031791	24490.5	-0.209637	0.0821091	-2.55315	0.0106754	0.0424578
		ENSMUSG00000031799	8290.11	0.504111	0.117946	4.2741	1.91908e-05	0.000328126
		ENSMUSG00000031803	717.332	0.371725	0.143366	2.59284	0.00951874	0.0388707
		ENSMUSG00000031807	2227.99	0.226928	0.0910922	2.49119	0.0127315	0.0485145
		ENSMUSG00000031813	996.869	0.290245	0.0903407	3.21278	0.00131457	0.00865616
		ENSMUSG00000031825	3644.05	-0.231529	0.0890521	-2.59993	0.0093244	0.0383372
		ENSMUSG00000031826	1781.22	-0.311625	0.099747	-3.12416	0.00178315	0.0108375
		ENSMUSG00000031827	789.277	0.55621	0.195642	2.843	0.00446905	0.0221994
		ENSMUSG00000031838	373.013	0.580491	0.165087	3.51627	0.000437663	0.00370132
		ENSMUSG00000031843	344.435	0.438803	0.149068	2.94365	0.00324367	0.0173199
		ENSMUSG00000031858	3208.39	-0.181715	0.0594226	-3.05802	0.00222807	0.0129019
		ENSMUSG00000031864	1710.74	-0.396355	0.12408	-3.19436	0.00140143	0.00909045
		ENSMUSG00000031871	12686.1	0.46176	0.0876942	5.26557	1.39753e-07	7.66316e-06
		ENSMUSG00000031875	1224.51	0.611205	0.151418	4.03654	5.4245e-05	0.000736073
		ENSMUSG00000031879	1456.33	0.300539	0.0942535	3.18863	0.0014295	0.00921466
		ENSMUSG00000031883	369.348	0.919861	0.17033	5.40047	6.64653e-08	4.45102e-06
		ENSMUSG00000031897	2454.37	0.377581	0.0688941	5.4806	4.23875e-08	3.11168e-06
		ENSMUSG00000031918	1459	0.210722	0.07804	2.70018	0.0069301	0.0305995
		ENSMUSG00000031948	5541.26	0.210809	0.0649208	3.24717	0.00116557	0.00790433
		ENSMUSG00000031954	1968.25	0.244396	0.0813551	3.00406	0.00266399	0.0148324
		ENSMUSG00000031965	4620.9	-0.566128	0.11455	-4.9422	7.72467e-07	2.68599e-05
		ENSMUSG00000031967	3977.5	-0.235068	0.0867649	-2.70925	0.00674346	0.0299583
		ENSMUSG00000031972	9277.94	-2.23944	0.446509	-5.01544	5.29135e-07	2.01951e-05
		ENSMUSG00000031974	3233.28	-0.269937	0.0877657	-3.07566	0.0021004	0.0122856
		ENSMUSG00000031976	537.183	-0.316535	0.107514	-2.94412	0.00323875	0.0173
		ENSMUSG00000031983	3672.6	-0.237086	0.0792536	-2.99149	0.00277623	0.0152461
		ENSMUSG00000031990	1132.67	0.479192	0.143896	3.33014	0.000868027	0.00630005
		ENSMUSG00000031993	2434.87	-0.375867	0.0704207	-5.33745	9.42621e-08	5.77755e-06
		ENSMUSG00000031996	18350.4	-0.231223	0.0830105	-2.78546	0.00534514	0.0253002
		ENSMUSG00000032000	736.452	0.403108	0.128557	3.13564	0.00171482	0.0104883
		ENSMUSG00000032011	438.378	1.05495	0.154655	6.82128	9.02308e-12	3.52753e-09
		ENSMUSG00000032014	713.419	0.666866	0.1785	3.73593	0.00018702	0.00192296
		ENSMUSG00000032028	200.679	0.55978	0.207079	2.70322	0.00686712	0.0304142
		ENSMUSG00000032030	3190.26	-0.394268	0.0862663	-4.57036	4.86886e-06	0.000113961
		ENSMUSG00000032034	4899.48	-0.451001	0.122735	-3.6746	0.000238222	0.00233461
		ENSMUSG00000032035	5645.42	0.60793	0.0922102	6.59288	4.31389e-11	1.15556e-08
		ENSMUSG00000032062	188.528	0.407011	0.159798	2.54704	0.010864	0.0429483
		ENSMUSG00000032067	2436.42	0.213987	0.0770086	2.77874	0.00545707	0.0256454
		ENSMUSG00000032068	114.902	0.667173	0.21552	3.09564	0.00196387	0.0117386
		ENSMUSG00000032085	1306.83	0.696901	0.199526	3.49279	0.000478008	0.0039715
		ENSMUSG00000032086	3179.81	-0.373781	0.0744832	-5.01833	5.21229e-07	2.00521e-05
		ENSMUSG00000032097	9311.96	-0.382981	0.0846377	-4.52495	6.04096e-06	0.000134022
		ENSMUSG00000032105	344.158	-0.517684	0.134705	-3.84308	0.000121498	0.00136449
		ENSMUSG00000032109	894.568	-0.268613	0.0984257	-2.72909	0.00635088	0.02869
		ENSMUSG00000032115	3721.5	-0.63521	0.183173	-3.46781	0.000524719	0.00427368
		ENSMUSG00000032118	156.806	0.990788	0.302958	3.27038	0.00107405	0.00746567
		ENSMUSG00000032125	2734.47	0.363023	0.0667055	5.44218	5.26325e-08	3.66023e-06
		ENSMUSG00000032135	2989.61	0.44585	0.125002	3.56673	0.000361462	0.00319789
		ENSMUSG00000032177	3284.96	-0.396498	0.1211	-3.27413	0.00105986	0.00739551
		ENSMUSG00000032185	2820.83	-0.296606	0.0964478	-3.0753	0.0021029	0.0122903
		ENSMUSG00000032187	3459.11	-0.259325	0.0813335	-3.18841	0.00143057	0.00921745
		ENSMUSG00000032194	5706.75	-0.258309	0.0732473	-3.52653	0.000421038	0.00358676
		ENSMUSG00000032216	30757.9	-0.325964	0.070729	-4.60863	4.05326e-06	9.83282e-05
		ENSMUSG00000032217	1141.78	-0.358079	0.09	-3.97866	6.93061e-05	0.000891123
		ENSMUSG00000032224	392.16	-1.48712	0.205083	-7.25132	4.12724e-13	3.14214e-10
		ENSMUSG00000032228	2279.19	0.20445	0.0788541	2.59276	0.00952083	0.0388707
		ENSMUSG00000032231	4728.3	0.446584	0.11199	3.98772	6.67121e-05	0.000865462
		ENSMUSG00000032235	552.842	-0.398054	0.102123	-3.89778	9.70797e-05	0.00114821
		ENSMUSG00000032238	2149.91	-0.294304	0.11022	-2.67014	0.00758195	0.0327479
		ENSMUSG00000032239	1880.68	0.178243	0.0655385	2.71967	0.00653468	0.0292985
		ENSMUSG00000032267	7523.49	-0.426291	0.122124	-3.49065	0.000481848	0.00399552
		ENSMUSG00000032271	175.009	0.854996	0.23164	3.69106	0.000223318	0.00222779
		ENSMUSG00000032285	7234.73	-0.331513	0.116457	-2.84665	0.00441816	0.0219995
		ENSMUSG00000032288	1386.97	0.38898	0.0750036	5.18615	2.14685e-07	1.01154e-05
		ENSMUSG00000032299	886.93	0.280005	0.0959821	2.91726	0.00353116	0.0185806
		ENSMUSG00000032308	523.405	-0.520876	0.10446	-4.98637	6.15228e-07	2.25597e-05
		ENSMUSG00000032316	1797.51	0.276734	0.105018	2.63511	0.0084109	0.0354808
		ENSMUSG00000032324	8367.02	-0.209959	0.0549357	-3.82191	0.000132421	0.00145774
		ENSMUSG00000032329	1663.71	-0.328965	0.0687379	-4.78579	1.70314e-06	5.00729e-05
		ENSMUSG00000032330	20847.7	0.452942	0.0772847	5.86069	4.60934e-09	5.86205e-07
		ENSMUSG00000032340	4693.01	-0.375522	0.0955866	-3.92861	8.54393e-05	0.00103681
		ENSMUSG00000032344	96.2051	0.637433	0.233682	2.72778	0.0063762	0.0287797
		ENSMUSG00000032349	1615.55	0.311109	0.0921608	3.37572	0.000736225	0.00554372
		ENSMUSG00000032353	1355.95	0.297262	0.108404	2.74217	0.00610339	0.0279384
		ENSMUSG00000032359	2423.79	0.321201	0.12279	2.61585	0.00890055	0.03706
		ENSMUSG00000032370	1102.83	-0.251315	0.0799194	-3.1446	0.00166312	0.0102633
		ENSMUSG00000032372	1286.19	-0.45861	0.106715	-4.2975	1.72733e-05	0.000304408
		ENSMUSG00000032375	738.885	-0.297434	0.10006	-2.97255	0.00295341	0.0160304
		ENSMUSG00000032381	2621.17	0.228582	0.0805011	2.83949	0.00451859	0.0223687
		ENSMUSG00000032382	1988.93	0.394333	0.0757876	5.20313	1.95957e-07	9.54385e-06
		ENSMUSG00000032383	3720.3	0.481895	0.092219	5.22555	1.73638e-07	8.81289e-06
		ENSMUSG00000032396	1969.99	-0.2313	0.079947	-2.89317	0.00381372	0.0196739
		ENSMUSG00000032397	417.221	0.593006	0.140772	4.21253	2.5253e-05	0.000404524
		ENSMUSG00000032398	1164.76	0.288004	0.105621	2.72678	0.00639551	0.0288215
		ENSMUSG00000032399	30257.3	0.262259	0.0604846	4.33597	1.45121e-05	0.000267412
		ENSMUSG00000032402	1246.73	-0.264464	0.0963363	-2.74521	0.00604718	0.0277162
		ENSMUSG00000032409	1305.54	-0.36897	0.116273	-3.1733	0.00150718	0.00958723
		ENSMUSG00000032410	1816.25	-0.349929	0.110119	-3.17773	0.00148431	0.00946676
		ENSMUSG00000032412	3047.81	0.221412	0.0875687	2.52844	0.0114572	0.0447793
		ENSMUSG00000032418	7410.56	-0.426196	0.102269	-4.1674	3.08096e-05	0.000471598
		ENSMUSG00000032419	327.882	0.559493	0.133691	4.18496	2.85212e-05	0.000447946
		ENSMUSG00000032422	1586.62	-0.298061	0.0887231	-3.35945	0.00078097	0.0057932
		ENSMUSG00000032435	3551.11	-0.397293	0.0994811	-3.99365	6.50633e-05	0.000850172
		ENSMUSG00000032436	639.45	0.702132	0.124922	5.62054	1.90362e-08	1.70957e-06
		ENSMUSG00000032437	3242.58	-0.250128	0.0767572	-3.25869	0.00111929	0.00769513
		ENSMUSG00000032449	3692.44	-0.480269	0.14743	-3.25761	0.00112355	0.00770973
		ENSMUSG00000032475	2491.74	0.424497	0.11026	3.84996	0.000118139	0.00133715
		ENSMUSG00000032479	20254.7	-0.370375	0.0791095	-4.6818	2.84372e-06	7.36534e-05
		ENSMUSG00000032481	1614.65	-0.257442	0.0765388	-3.36355	0.00076947	0.0057314
		ENSMUSG00000032492	308.171	0.474349	0.160742	2.951	0.00316746	0.0170072
		ENSMUSG00000032495	21730.6	-0.321317	0.128397	-2.50253	0.0123311	0.0473881
		ENSMUSG00000032497	5709	-0.392649	0.110855	-3.542	0.00039711	0.00343347
		ENSMUSG00000032501	932.287	-0.518017	0.111366	-4.65146	3.29586e-06	8.30568e-05
		ENSMUSG00000032504	4787.89	-0.16906	0.0646662	-2.61435	0.00893967	0.0372015
		ENSMUSG00000032508	865.764	0.39013	0.11146	3.50018	0.000464951	0.00388759
		ENSMUSG00000032511	15670.1	-0.829493	0.102351	-8.10441	5.30006e-16	1.09522e-12
		ENSMUSG00000032513	1783.52	-0.266656	0.0983433	-2.71148	0.00669832	0.0297943
		ENSMUSG00000032518	35793.5	0.406596	0.0822847	4.94133	7.75919e-07	2.69153e-05
		ENSMUSG00000032525	3782.98	-0.619193	0.103599	-5.97681	2.27551e-09	3.35869e-07
		ENSMUSG00000032527	6698.12	-0.23921	0.0902091	-2.65173	0.00800817	0.034221
		ENSMUSG00000032536	17219.2	-0.288468	0.0755179	-3.81987	0.000133522	0.00146763
		ENSMUSG00000032540	3669.86	-0.228011	0.0788018	-2.89347	0.00381009	0.0196638
		ENSMUSG00000032554	2876.57	0.589939	0.168632	3.49839	0.000468072	0.00390402
		ENSMUSG00000032560	3345.46	-0.303169	0.0778262	-3.89547	9.80104e-05	0.00115732
		ENSMUSG00000032562	11818.1	0.32043	0.0963739	3.32486	0.00088464	0.00639496
		ENSMUSG00000032563	6019.41	-0.286488	0.0869231	-3.29588	0.000981145	0.00695017
		ENSMUSG00000032577	1763.27	-0.27643	0.0980655	-2.81883	0.00481997	0.0235189
		ENSMUSG00000032580	4943.23	-0.272659	0.0781562	-3.48864	0.000485491	0.00401752
		ENSMUSG00000032594	4325.78	0.261171	0.0856353	3.04981	0.00228988	0.0131598
		ENSMUSG00000032596	1433.39	0.356508	0.0970533	3.67332	0.000239419	0.00234158
		ENSMUSG00000032601	5647.46	-0.384814	0.0739308	-5.20506	1.93935e-07	9.47724e-06
		ENSMUSG00000032612	4846.22	-0.211356	0.0682542	-3.0966	0.00195755	0.0117056
		ENSMUSG00000032621	1951.27	-0.503195	0.102653	-4.90192	9.49069e-07	3.16999e-05
		ENSMUSG00000032637	3004.79	-0.21887	0.0746753	-2.93095	0.00337922	0.0179169
[truncated: 1,841 more rows]

## Sheet: Figure 6b
	Figure 6b
	Row Data
		Up regulated in CD VEH
		ID	Description	GeneRatio	BgRatio	pvalue	p.adjust	qvalue	geneID	Count
		GO:0002181	cytoplasmic translation	35/1804	81/19650	5.57285e-16	3.21776e-12	2.55999e-12	Rpl8/Rplp1/Rpl15/Rpl19/Rwdd1/Dph3/Rps26/Eif3m/Rpl6/Eif4ebp1/Nck1/Rpsa/Rps29/Rpl10a/Rps21/Rps2/Rpl18a/Rpl9/Rpl29/Rps23/Rpl38/Rpl36/Rpl30/Rpl18/Rpl11/Rpl35a/Rpl26/Rpl17/Rplp0/Rps28/Rpl31/Rpl13a/Rpl39/Tma7/Rpl24	35
		GO:1901342	regulation of vasculature development	79/1804	334/19650	2.0728e-15	5.98417e-12	4.76089e-12	Pparg/Pdgfb/Acvrl1/Serpinf1/Ramp2/Efnb2/Klf4/Aqp1/Pgf/Ccl24/Hmox1/Tek/Hdac5/Dll1/Gata2/Cybb/Notch4/H2-M3/Cd34/Sparc/Mydgf/Sema6a/Akt3/Dcn/Ccl11/Vash1/Plk2/Rgcc/Enpp2/Rapgef3/Emp2/Thbs2/Anxa1/Hhex/Pdcl3/Notch1/Dll4/Il1b/Pdcd10/Cth/Angptl3/Nos3/Pf4/Anxa3/Tspan12/Ephb4/Tnfrsf1a/Vegfc/Smad1/Cdh5/Ets1/Ctsh/Card10/Tie1/Jcad/Tbxa2r/Ccl2/Meox2/Btg1/Ppp1r16b/Hoxa5/Rras/Ptger4/Hey1/Prkd2/Mmrn2/Id1/S100a1/G…	79
		GO:0045765	regulation of angiogenesis	72/1804	300/19650	1.66031e-14	3.19555e-11	2.54232e-11	Pparg/Acvrl1/Serpinf1/Ramp2/Klf4/Aqp1/Pgf/Ccl24/Hmox1/Tek/Hdac5/Dll1/Gata2/Cybb/Notch4/H2-M3/Cd34/Sparc/Mydgf/Sema6a/Akt3/Dcn/Ccl11/Vash1/Plk2/Rgcc/Enpp2/Rapgef3/Emp2/Thbs2/Anxa1/Hhex/Pdcl3/Notch1/Dll4/Il1b/Pdcd10/Angptl3/Nos3/Pf4/Anxa3/Tspan12/Tnfrsf1a/Vegfc/Smad1/Cdh5/Ets1/Ctsh/Card10/Tie1/Jcad/Tbxa2r/Ccl2/Meox2/Btg1/Ppp1r16b/Hoxa5/Rras/Prkd2/Mmrn2/Id1/S100a1/Gpr4/Aplnr/Adrb2/Pik3r6/Rhoj/Foxc1/…	72
		GO:0034341	response to interferon-gamma	44/1804	135/19650	2.52442e-14	3.644e-11	2.89909e-11	Pparg/Ccl24/Cdc42/Irf1/Cxcl16/Ccl11/Nos2/Ifitm1/Ifitm3/Casp1/Slc11a1/Mrc1/Vim/Nmi/Tlr2/Gbp3/Gbp2/Gbp9/Rab43/Stx4a/Trim21/Parp14/Dapk3/Ccl7/Ccl2/H2-Aa/Socs1/Stx11/Gbp7/Cdc42ep2/Bst2/Irgm1/Vamp8/Rab7b/Capg/H2-Q7/H2-Eb1/Ifitm2/Actg1/Rpl13a/Tgtp1/Gbp4/Ccl21a/Vamp8	44
		GO:0002478	antigen processing and presentation of exogenous peptide antigen	17/1804	25/19650	1.15099e-12	1.25928e-09	1.00186e-09	Ctse/Fcgr1/H2-M3/Tapbp/Tap2/Clec4a2/Ifi30/H2-Aa/Unc93b1/Tap1/H2-DMa/Fcer1g/Fcgr3/H2-Eb1/B2m/H2-K1/H2-T23	17
		GO:0002697	regulation of immune effector process	83/1804	403/19650	1.42979e-12	1.25928e-09	1.00186e-09	Lgals9/Tgfb1/Irf3/Ptpn6/Gab2/Hmox1/Tek/Gprc5b/Gata2/Fcgr1/H2-M3/Irf1/Tnfaip3/Enpp3/Vsir/Irak3/Rsad2/Ripk3/Serping1/Tap2/Tmem173/Tnf/Anxa1/Il33/Smad7/Il1r1/Cd55/Il1b/Tlr2/Creb3/Tnfrsf1b/Fgr/Cxcl1/Zc3hav1/Foxp1/Il4ra/Cd37/Stx4a/Pqbp1/Il15/Kars/Cgas/Rac2/Mif/Dpp4/Nfkbiz/Ccl2/H2-Q4/Cuedc2/Tap1/Arid5a/Hlx/Ddx58/Rps19/Ripk2/Nop53/Lyn/Selenok/Shld1/Serpinb9/Pik3r6/Vamp8/Fes/H2-T24/H2-T22/Fcer1g/Fcgr3/H2…	83
		GO:0048002	antigen processing and presentation of peptide antigen	27/1804	63/19650	1.52667e-12	1.25928e-09	1.00186e-09	Ctse/Fcgr1/H2-M3/Tapbp/Tap2/Slc11a1/Clec4a2/Ifi30/H2-Q4/H2-Aa/Unc93b1/Tap1/H2-DMa/Tapbpl/Ctss/H2-T24/H2-T22/Fcer1g/Fcgr3/H2-Q7/H2-Eb1/B2m/H2-K1/H2-T23/H2-Q10/H2-Q6/H2-D1	27
		GO:0043534	blood vessel endothelial cell migration	37/1804	114/19650	3.29184e-12	2.37588e-09	1.89021e-09	Alox12/Pparg/Pdgfb/Acvrl1/Efnb2/Tgfb1/Apoe/Klf4/Hmox1/Hdac5/Gata2/Akt3/Vash1/Plk2/Rgcc/Myh9/Emp2/Anxa1/Notch1/Dll4/Pdcd10/Nos3/Ephb4/Vegfc/Ets1/Card10/Vhl/Jcad/Tbxa2r/Meox2/Scarb1/Prkd2/Mmrn2/Clec14a/Rhoj/Prcp/Itgb1bp1	37
		GO:0019884	antigen processing and presentation of exogenous antigen	18/1804	30/19650	5.83495e-12	3.74345e-09	2.97821e-09	Ctse/Fcgr1/H2-M3/Tapbp/Tap2/Clec4a2/Ifi30/H2-Aa/Unc93b1/Tap1/H2-DMa/Fcer1g/Fcgr3/H2-Eb1/B2m/H2-K1/H2-T23/Psme2	18
		GO:0050900	leukocyte migration	72/1804	338/19650	8.40776e-12	4.85464e-09	3.86226e-09	Pdgfb/Lgals9/Il16/Tgfb1/Pgf/Ccl24/Cdc42/Rarres2/Eps8/Cd34/Ada/Cxcl16/Stk10/Ccl11/Pecam1/Ednrb/Ripk3/Apod/Retnlg/Cd200/App/Pla2g7/Tnf/Anxa1/Il33/Podxl/Il1r1/Mstn/Il1b/Tlr2/Creb3/Padi2/Ppbp/Pf4/Cxcl1/Cxcl9/Cd9/Coro1a/Swap70/Msn/Mpp1/Vegfc/Kars/Jam3/Thy1/Myd88/Slc8b1/Rac2/Mif/Itga2b/Gpsm3/Ccl7/Ccl2/Cyp7b1/Ptger4/Spns2/Rps19/Lyn/Hsd3b7/Selenok/Selplg/Ch25h/Plcb1/Fcer1g/Fcgr3/Mospd2/Mapk3/Ano6/Lrch1/R…	72
		GO:0019882	antigen processing and presentation	34/1804	102/19650	1.06441e-11	5.58717e-09	4.44504e-09	Rab34/Relb/Ctse/Fcgr1/H2-M3/Cd68/Tapbp/Psmb8/Tap2/Slc11a1/Clec4a2/Ifi30/H2-Q4/H2-Aa/Unc93b1/Tap1/H2-DMa/Tapbpl/Ctss/Rftn1/H2-T24/H2-T22/Fcer1g/Fcgr3/H2-Q7/H2-Eb1/B2m/H2-K1/H2-T23/H2-Q10/H2-Q6/H2-D1/Psme2/Psmb9	34
		GO:0002443	leukocyte mediated immunity	75/1804	362/19650	1.28157e-11	6.16649e-09	4.90594e-09	Lgals9/Tcirg1/Tgfb1/Ercc1/Ptpn6/Gab2/Hmox1/Gata2/Fcgr1/H2-M3/Vsir/Rsad2/Ripk3/Emp2/Serping1/Tap2/C2/Tnf/Irf7/Smad7/Il1r1/Slc11a1/Cd55/Il1b/Tlr2/Bcl10/Tnfrsf1b/Prdx1/Fgr/Cxcl1/Anxa3/Coro1a/Il4ra/Stx4a/Swap70/Ctsh/Myd88/Rac2/Crlf2/Dpp4/H2-Q4/C1qa/C1qc/C1qb/Tap1/Arid5a/H2-DMa/C1s1/Stx11/Rftn1/Ddx58/Milr1/Lyn/Shld1/Serpinb9/Pik3r6/Vamp8/Fes/Bcl3/H2-T24/C1ra/H2-T22/Fcer1g/Pirb/Fcgr3/H2-Q7/B2m/H2-K1/H2…	75
		GO:0002460	adaptive immune response based on somatic recombination of immune receptors	64/1804	294/19650	4.60216e-11	2.04407e-08	1.62622e-08	Tcirg1/Tgfb1/Relb/Ercc1/Ptpn6/Fcgr1/H2-M3/Ada/Irf1/Tnfaip3/Vsir/Rsad2/Ripk3/Emp2/Serping1/Tap2/C2/Tnf/Anxa1/Il33/Irf7/Smad7/Il1r1/Slc11a1/Cd55/Il1b/Bcl10/Tnfrsf1b/Il4ra/Swap70/Ctsh/Myd88/Crlf2/Dpp4/Nfkbiz/H2-Q4/C1qa/C1qc/C1qb/Arid5a/H2-DMa/C1s1/Stx11/Rftn1/Hlx/Ripk2/Klhl6/Shld1/Serpinb9/Bcl3/H2-T24/C1ra/H2-T22/Fcer1g/Pirb/Fcgr3/H2-Q7/B2m/H2-K1/H2-T23/H2-Q10/H2-Q6/H2-D1/Clec4g	64
		GO:0030099	myeloid cell differentiation	78/1804	395/19650	5.92607e-11	2.44408e-08	1.94447e-08	Pparg/Rarg/Tcirg1/Spi1/Tgfb1/Relb/Dnase2a/Ptpn6/Gab2/Lbr/Dll1/Gata2/Fli1/Tcf3/Id2/Nme2/Ripk1/Sfxn1/Dab2/Myh9/Hcls1/App/Tnf/Rps14/Csf1r/Hhex/Ldb1/Casp8/Sp3/Car2/Zbtb46/Eif6/Tlr2/Ptbp3/Rps6/Tal1/Wasf2/Ctnnbip1/Pf4/Clec5a/Ltbr/Tyrobp/G6pdx/Casp3/Il15/Il34/Ets1/Anxa2/Trf/Gas2l1/Isg15/C1qc/Cdkn1c/Hoxa5/Itpkb/Lrrc17/Rps19/Lyn/Sh2b3/Cd109/Plcb1/Nrros/Jun/Rab7b/Junb/Fes/Hmgb2/Klf2/Gpc3/Adgrf5/Tmod3/Fcer1…	78
		GO:0043542	endothelial cell migration	49/1804	197/19650	6.69567e-11	2.57739e-08	2.05052e-08	Alox12/Pparg/Pdgfb/Acvrl1/Serpinf1/Efnb2/Tgfb1/Apoe/Klf4/Hmox1/Tek/Hdac5/Gata2/Sparc/Akt3/Dcn/Pecam1/Vash1/Plk2/Rgcc/Myh9/Emp2/Snai2/Anxa1/Coro1b/Notch1/Dll4/Pdcd10/Nos3/Anxa3/Ephb4/Vegfc/Ets1/Card10/Vhl/Jcad/Loxl2/Tbxa2r/Dpp4/Meox2/Scarb1/Prkd2/Mmrn2/Clec14a/Rhoj/Prcp/Itgb1bp1/Ceacam1/Coro1b	49
		Down regulated in CD VEH
		ID	Description	GeneRatio	BgRatio	pvalue	p.adjust	qvalue	geneID	Count
		GO:0055001	muscle cell development	65/1866	202/19650	2.12873e-19	1.02729e-15	8.03437e-16	Hdac9/Tmod4/Homer1/Cacna2d2/Prox1/Xk/Mypn/Sgcd/Myocd/Prkar1a/Ldb3/Gata4/Ppara/Gsk3b/Cxadr/Rcan1/Vegfa/Myom1/Afg3l2/Speg/Obsl1/Hdac4/Neb/Ppp3ca/Pdlim5/Tmod1/Mtor/Sgcb/Atp2a2/Lmod2/Mef2a/Myom2/Sorbs2/Mylk3/Acta1/Ank2/Map2k4/Fhod3/Six4/Ripor2/Tmtc3/Alpk3/Synpo2l/Myh6/Dicer1/Pgm5/Pbrm1/Dmd/Adra1a/Nrap/Ttn/Actn2/Camk2d/Slc8a1/Bcl2/Lrrc10/Naca/Akap6/Actc1/Flnc/Bves/Myo18b/Klhl41/Capn3/Xirp1	65
		GO:0055002	striated muscle cell development	62/1866	188/19650	3.59946e-19	1.02729e-15	8.03437e-16	Hdac9/Tmod4/Homer1/Cacna2d2/Prox1/Xk/Mypn/Sgcd/Myocd/Prkar1a/Ldb3/Gata4/Ppara/Gsk3b/Cxadr/Rcan1/Vegfa/Myom1/Afg3l2/Speg/Obsl1/Hdac4/Neb/Ppp3ca/Pdlim5/Tmod1/Mtor/Sgcb/Lmod2/Mef2a/Myom2/Sorbs2/Mylk3/Acta1/Map2k4/Fhod3/Six4/Ripor2/Tmtc3/Alpk3/Synpo2l/Myh6/Dicer1/Pgm5/Dmd/Adra1a/Nrap/Ttn/Actn2/Camk2d/Slc8a1/Bcl2/Lrrc10/Naca/Akap6/Actc1/Flnc/Bves/Myo18b/Klhl41/Capn3/Xirp1	62
		GO:0003012	muscle system process	93/1866	391/19650	3.92578e-17	7.46945e-14	5.84183e-14	Tmod4/Homer1/Kcnq1/Cacna1d/Akap1/Scn1b/Ccn2/Sgcd/Smtn/Pgam2/Myocd/Rock2/Ryr2/Col4a3bp/Camk2g/Slmap/Gata4/Atp8a2/Fbxo32/Ppara/Gsk3b/Myom1/Cacna1h/Rock1/Dsc2/Nedd4l/Oga/Gaa/Obsl1/Hdac4/Parp1/Atp1b1/Snta1/P2ry1/Ppp3ca/Pdlim5/Tmod1/Tmem38b/Mtor/Atp2a2/Lmod2/Clcn1/Klf15/Grip2/Mef2a/Myh14/Myom2/Ednra/Sorbs2/Tmem38a/Tbx20/Kcnj5/Smad3/Scn5a/Ank2/Atp1a1/Kdm4a/Map2k4/Scn10a/Tnni3k/Cacna2d1/Abcc8/Ppp1r13l/M…	93
		GO:0010506	regulation of autophagy	68/1866	247/19650	2.9878e-16	4.26359e-13	3.33454e-13	Mid2/Hk2/Poldip2/Tsc2/Golga2/Ikbkg/Ulk2/Ubqln1/Eif4g2/Ubqln4/Mapt/Pip4k2b/Atp6v0a1/Vps13d/Hif1a/Zkscan3/Dapk1/Gata4/Mtdh/Dnm1l/Gsk3b/Rab12/Rock1/Fyco1/Pip4k2c/Usp33/Mfsd8/Pikfyve/Optn/Lrsam1/Tsc1/Cisd2/Rragd/Map3k7/Prkaa2/Rragc/Mtor/Mfn2/Htt/Ulk1/Bag3/Pim2/Hdac6/Usp10/Ulk3/Kdm4a/Atm/Mtmr3/Vps13c/Rubcn/Rab3gap1/Larp1/Tigar/Trp53inp2/Herc1/Foxk2/Rab3gap2/Mul1/Hspb8/Wdr41/Adra1a/Eif4g1/Foxo3/Smcr8/U…	68
		GO:0014706	striated muscle tissue development	97/1866	431/19650	3.97392e-16	4.34672e-13	3.39956e-13	Mef2d/Srpk3/Crhr2/Hlf/Hdac9/Apc/Usp19/Homer1/Rbfox1/Prox1/Xk/Jph2/Meis1/Frs2/Sgcd/Myocd/Prkar1a/Nf1/Kat2a/Asb2/Ryr2/Nln/Bmpr1a/Gata4/Rb1/Ppara/Gsk3b/Cxadr/Rcan1/Vegfa/Myom1/Svil/Speg/Obsl1/Hdac4/Ccnt2/Tsc1/Neb/Ppp3ca/Pdlim5/Mtor/Sgcb/Lrp6/Mef2a/Myh14/Hdac6/Myom2/Sorbs2/Mylk3/Tbx20/Acta1/Smad3/Arid2/Map2k4/Gpc1/Fhod3/Six4/Ripor2/Fgf1/Rbm24/Alpk3/Cited2/Ppp1r13l/Myh6/Chd7/Dicer1/Pgm5/Pkp2/Dsg2/Dmd/…	97
		GO:0060048	cardiac muscle contraction	45/1866	124/19650	4.56909e-16	4.34672e-13	3.39956e-13	Kcnq1/Cacna1d/Scn1b/Ccn2/Sgcd/Smtn/Ryr2/Gata4/Cacna1h/Dsc2/Nedd4l/Gaa/Hdac4/Atp1b1/Snta1/Tmem38b/Mtor/Atp2a2/Tmem38a/Kcnj5/Scn5a/Ank2/Atp1a1/Scn10a/Tnni3k/Cacna2d1/Ppp1r13l/Myh6/Pkp2/Dsg2/Dmd/Adra1a/Gpd1l/Cacna1c/Ttn/Myh7/Camk2d/Slc8a1/Dsp/Cacnb2/Rnf207/Ctnna3/Akap6/Myl1/Actc1	45
		GO:0060047	heart contraction	61/1866	210/19650	6.60469e-16	5.38566e-13	4.21211e-13	Crhr2/Kcnq1/Cacna2d2/Cacna1d/Scn1b/Ccn2/Mdm2/Sgcd/Smtn/Ryr2/Thrb/Gata4/Dnm1l/Cxadr/Rps6ka2/Cacna1h/Dsc2/Hbegf/Nedd4l/Gaa/Hdac4/Atp1b1/Snta1/Tmem38b/Mtor/Atp2a2/Mef2a/Gnao1/Tmem38a/Kcnj5/Scn5a/Ank2/Atp1a1/Scn10a/Tnni3k/Cacna2d1/Ppp1r13l/Myh6/Kcnd3/Pik3r1/Pkp2/Dsg2/Dmd/Chrm2/Adra1a/Gpd1l/Prkca/Cacna1c/Ttn/Myh7/Camk2d/Mdm4/Slc8a1/Dsp/Cacnb2/Rnf207/Ctnna3/Akap6/Myl1/Actc1/Bves	61
		GO:0060537	muscle tissue development	99/1866	452/19650	1.29241e-15	9.22135e-13	7.21199e-13	Mef2d/Srpk3/Crhr2/Hlf/Hdac9/Apc/Usp19/Homer1/Rbfox1/Prox1/Xk/Jph2/Meis1/Frs2/Sgcd/Myocd/Prkar1a/Nf1/Kat2a/Asb2/Ryr2/Nln/Bmpr1a/Gata4/Rb1/Ppara/Gsk3b/Cxadr/Rcan1/Vegfa/Myom1/Svil/Zfand5/Speg/Obsl1/Hdac4/Ccnt2/Tsc1/Neb/Ppp3ca/Pdlim5/Mtor/Sgcb/Lrp6/Mef2a/Myh14/Hdac6/Myom2/Sorbs2/Mylk3/Tbx20/Acta1/Smad3/Arid2/Map2k4/Gpc1/Fhod3/Six4/Ripor2/Fgf1/Rbm24/Alpk3/Cited2/Ppp1r13l/Myh6/Chd7/Dicer1/Pgm5/Pkp2/Ds…	99
		GO:0003015	heart process	62/1866	220/19650	1.85158e-15	1.13966e-12	8.91328e-13	Crhr2/Kcnq1/Cacna2d2/Cacna1d/Scn1b/Ccn2/Mdm2/Sgcd/Smtn/Ryr2/Thrb/Gata4/Dnm1l/Cxadr/Rps6ka2/Cacna1h/Dsc2/Hbegf/Nedd4l/Gaa/Hdac4/Atp1b1/Snta1/Tmem38b/Mtor/Atp2a2/Mef2a/Gnao1/Tmem38a/Kcnj5/Scn5a/Ank2/Atp1a1/Scn10a/Tnni3k/Cacna2d1/Ppp1r13l/Myh6/Kcnd3/Pik3r1/Pkp2/Dsg2/Dmd/Chrm2/Adra1a/Gpd1l/Prkca/Cacna1c/Ttn/Myh7/Yap1/Camk2d/Mdm4/Slc8a1/Dsp/Cacnb2/Rnf207/Ctnna3/Akap6/Myl1/Actc1/Bves	62
		GO:0042692	muscle cell differentiation	89/1866	388/19650	1.99661e-15	1.13966e-12	8.91328e-13	Hdac9/Tmod4/Homer1/Cacna2d2/Prox1/Xk/Mypn/Frs2/Sgcd/Myocd/Prkar1a/Spag9/Kat2a/Nln/Ldb3/Gata4/Rb1/Ppara/Gsk3b/Cxadr/Rcan1/Vegfa/Myom1/Cdh2/Afg3l2/Smarca2/Speg/Obsl1/Hdac4/Ccnt2/Tsc1/Neb/Ppp3ca/Pdlim5/Tmod1/Mtor/Sgcb/Atp2a2/Lmod2/Mef2a/Hdac6/Mecp2/Myom2/Sorbs2/Mylk3/Acta1/Smarca4/Rora/Neo1/Ank2/Map2k4/Fhod3/Six4/Ripor2/Tmtc3/Rbm24/Alpk3/Synpo2l/Myh6/Dicer1/Pgm5/Pbrm1/Trim72/Dmd/Adra1a/Fbxo40/Nrap/P…	89
		GO:0051146	striated muscle cell differentiation	76/1866	311/19650	6.6319e-15	3.44135e-12	2.69147e-12	Hdac9/Tmod4/Homer1/Cacna2d2/Prox1/Xk/Mypn/Frs2/Sgcd/Myocd/Prkar1a/Spag9/Kat2a/Nln/Ldb3/Gata4/Rb1/Ppara/Gsk3b/Cxadr/Rcan1/Vegfa/Myom1/Cdh2/Afg3l2/Speg/Obsl1/Hdac4/Tsc1/Neb/Ppp3ca/Pdlim5/Tmod1/Mtor/Sgcb/Lmod2/Mef2a/Hdac6/Myom2/Sorbs2/Mylk3/Acta1/Neo1/Map2k4/Fhod3/Six4/Ripor2/Tmtc3/Rbm24/Alpk3/Synpo2l/Myh6/Dicer1/Pgm5/Trim72/Dmd/Adra1a/Nrap/Plpp7/Ttn/Sox6/Actn2/Camk2d/Slc8a1/Smyd1/Bcl2/Lrrc10/Naca/A…	76
		GO:0086001	cardiac muscle cell action potential	27/1866	53/19650	1.73583e-14	8.25678e-12	6.45761e-12	Kcnq1/Cacna1d/Scn1b/Ryr2/Slmap/Cxadr/Dsc2/Nedd4l/Snta1/Atp2a2/Fgf13/Kcnj5/Scn5a/Ank2/Scn10a/Cacna2d1/Pkp2/Dsg2/Dmd/Gpd1l/Cacna1c/Camk2d/Dsp/Cacnb2/Rnf207/Ctnna3/Ank3	27
		GO:0006941	striated muscle contraction	49/1866	158/19650	2.91605e-14	1.28037e-11	1.00137e-11	Homer1/Kcnq1/Cacna1d/Scn1b/Ccn2/Sgcd/Smtn/Pgam2/Ryr2/Gata4/Atp8a2/Cacna1h/Dsc2/Nedd4l/Gaa/Hdac4/Atp1b1/Snta1/Tmem38b/Mtor/Atp2a2/Myh14/Tmem38a/Kcnj5/Scn5a/Ank2/Atp1a1/Scn10a/Tnni3k/Cacna2d1/Ppp1r13l/Myh6/Pkp2/Dsg2/Dmd/Adra1a/Gpd1l/Cacna1c/Ttn/Myh7/Camk2d/Slc8a1/Dsp/Cacnb2/Rnf207/Ctnna3/Akap6/Myl1/Actc1	49
		GO:0008016	regulation of heart contraction	52/1866	175/19650	3.32594e-14	1.35603e-11	1.06055e-11	Crhr2/Kcnq1/Cacna2d2/Cacna1d/Scn1b/Ccn2/Mdm2/Smtn/Ryr2/Thrb/Gata4/Cxadr/Cacna1h/Dsc2/Hbegf/Gaa/Hdac4/Atp1b1/Snta1/Tmem38b/Atp2a2/Mef2a/Fgf13/Gnao1/Tmem38a/Kcnj5/Scn5a/Ank2/Atp1a1/Scn10a/Tnni3k/Cacna2d1/Myh6/Kcnd3/Pik3r1/Pkp2/Dsg2/Dmd/Chrm2/Adra1a/Gpd1l/Prkca/Cacna1c/Myh7/Mdm4/Slc8a1/Dsp/Cacnb2/Rnf207/Ctnna3/Akap6/Bves	52
		GO:0006936	muscle contraction	71/1866	289/19650	3.88734e-14	1.39357e-11	1.08991e-11	Tmod4/Homer1/Kcnq1/Cacna1d/Scn1b/Ccn2/Sgcd/Smtn/Pgam2/Myocd/Rock2/Ryr2/Col4a3bp/Slmap/Gata4/Atp8a2/Myom1/Cacna1h/Dsc2/Nedd4l/Gaa/Obsl1/Hdac4/Atp1b1/Snta1/Tmod1/Tmem38b/Mtor/Atp2a2/Lmod2/Clcn1/Grip2/Myh14/Myom2/Ednra/Tmem38a/Tbx20/Kcnj5/Scn5a/Ank2/Atp1a1/Scn10a/Tnni3k/Cacna2d1/Ppp1r13l/Myh6/Pkp2/Dsg2/Dock5/Dmd/Chrm2/Adra1a/Gpd1l/Arhgap42/Prkca/Cacna1c/Ttn/Actn2/Myh7/Camk2d/Slc8a1/Dsp/Setd3/Abat/Ca…	71

## Sheet: Figure 6c
	Figure 6c
	Row Data
		geneID	WT VEH	WT VEH	CD VEH	CD VEH	CD VEH	CD JZL184	CD JZL184	CD JZL184
		ENSMUSG00000000001	1806.92	1582.92	2236.33	1786.18	2142.03	1537.36	1547.87	1569.09
		ENSMUSG00000000058	3474.49	3539.92	5647.51	5127.74	5590.94	3368.36	3683.22	3396.08
		ENSMUSG00000000317	1681.74	1704.22	3592	2342.1	3640.68	2213.91	2230.88	2219.03
		ENSMUSG00000000440	621.204	557.54	896.291	766.653	859.112	675.592	646.972	584.75
		ENSMUSG00000000489	1895.5	1984.51	3204.95	2379.23	3353.03	1924.09	2112.72	2216.19
		ENSMUSG00000000530	1925.02	1789.83	2382.94	2246.77	2431.59	1997.03	1980.31	2010.25
		ENSMUSG00000000531	503.104	526.961	864.036	735.545	811.171	587.304	568.196	573.414
		ENSMUSG00000000581	1778.58	1651.21	2134.68	1965.8	2080.66	1509.53	1488.37	1477.46
		ENSMUSG00000000594	905.824	900.014	1106.44	1100.81	1120.87	894.392	963.754	928.609
		ENSMUSG00000000740	16171.4	15863.9	23811.8	20116.6	22566.1	15781.4	15602.8	16001.7
		ENSMUSG00000000753	1139.66	1134.45	1397.71	1361.71	1683.71	1094	1205.95	1154.38
		ENSMUSG00000000805	979.046	1223.12	1710.48	1815.28	1809.31	1382.85	1255.39	1118.49
		ENSMUSG00000001020	239.742	184.487	455.476	321.111	436.268	208.244	233.815	144.534
		ENSMUSG00000001025	1405.39	1015.19	2231.44	1590.5	1978.07	1086.32	1314.9	1062.75
		ENSMUSG00000001029	1181	1143.62	1812.13	1479.12	1816.98	894.392	1261.26	1111.87
		ENSMUSG00000001053	566.878	478.037	818.097	868.004	944.448	607.457	739.158	768.015
		ENSMUSG00000001056	511.371	572.829	747.723	680.354	737.341	508.613	561.492	533.738
		ENSMUSG00000001098	3418.98	3364.6	4103.19	3950.67	4518.01	3135.17	3340.46	3179.75
		ENSMUSG00000001105	1418.38	1346.45	1577.55	1607.56	1806.44	1365.58	1376.07	1326.31
		ENSMUSG00000001123	1372.32	1523.81	2315.5	2069.16	2560.08	1319.52	1752.36	1706.07
		ENSMUSG00000001128	396.815	457.651	581.563	608.104	645.293	348.352	410.643	372.199
		ENSMUSG00000001158	1852.98	1717.47	2222.64	1993.9	2334.75	1796.46	1642.57	1632.39
		ENSMUSG00000001240	1599.07	1566.61	2474.82	2313	2697.19	1638.12	1832.81	1782.59
		ENSMUSG00000001288	942.435	1106.92	1484.7	1903.59	1503.45	1050.81	1330.82	1244.13
		ENSMUSG00000001289	5730.19	5532.59	7968.87	6732.3	7196.02	5560.2	5372.72	5451.68
		ENSMUSG00000001300	1077.07	1182.35	1659.65	1562.41	1554.26	1262.9	1312.38	1370.71
		ENSMUSG00000001313	225.57	254.817	373.373	319.104	351.891	243.751	256.442	227.665
		ENSMUSG00000001383	2070.29	2146.58	2430.83	2274.87	2536.11	2013.34	2104.34	2062.21
		ENSMUSG00000001418	1686.46	1688.93	2071.14	2056.11	2074.91	1705.29	1882.25	1738.19
		ENSMUSG00000001739	102.747	122.312	150.522	308.066	196.56	128.593	152.525	104.858
		ENSMUSG00000001741	631.833	565.694	766.294	834.889	877.33	542.201	696.417	721.727
		ENSMUSG00000001750	843.231	882.686	1082.98	1085.76	1284.83	742.767	832.181	800.134
		ENSMUSG00000001946	4004.76	3688.73	4725.81	4585.87	4921.68	3518.07	3746.91	3359.24
		ENSMUSG00000001999	653.091	730.815	851.329	787.726	850.483	713.018	689.713	669.77
		ENSMUSG00000002014	1964	1963.11	2527.6	2322.03	2538.98	1815.65	1813.53	1892.17
		ENSMUSG00000002059	377.919	361.84	483.821	460.594	482.292	409.77	358.684	405.263
		ENSMUSG00000002111	222.027	225.258	361.644	307.063	417.091	179.454	269.013	197.436
		ENSMUSG00000002233	2297.04	2530.84	3414.11	2847.85	3826.69	1982.63	2582.86	2045.21
		ENSMUSG00000002325	995.58	1124.25	1654.77	1495.17	1945.47	1094.96	1227.74	1248.85
		ENSMUSG00000002379	13549.6	14965.9	16615.1	16981.8	17369.2	13311.3	14384.2	13773.3
		ENSMUSG00000002395	4764.14	4806.87	6647.41	6141.25	6220.89	5076.54	4664.57	4808.36
		ENSMUSG00000002416	9593.23	9155.06	11118.1	10722.1	11612.4	8831.64	8847.26	8742.91
		ENSMUSG00000002504	6214.4	6477.45	9006.89	8838.58	9961.29	6986.24	7231.51	6965.99
		ENSMUSG00000002550	1093.6	1129.35	1320.49	1385.8	1311.68	1126.63	1254.56	1168.55
		ENSMUSG00000002602	4310.64	4396.1	5738.41	5237.12	5775.04	3903.85	4607.58	4028.07
		ENSMUSG00000002617	243.285	251.759	411.492	359.243	313.538	301.329	213.702	234.278
		ENSMUSG00000002679	542.077	535.116	738.927	641.219	734.464	464.469	519.589	480.836
		ENSMUSG00000002732	824.335	822.549	1148.46	1051.64	1167.86	886.714	927.718	828.474
		ENSMUSG00000002733	1145.57	1184.39	1386.95	1327.59	1413.32	1141.98	1232.77	1196.89
		ENSMUSG00000002768	1254.22	1359.7	1650.86	1645.69	1738.36	1235.07	1293.94	1238.46
		ENSMUSG00000002847	808.982	828.665	1411.39	1356.69	1274.29	831.055	923.528	892.712
		ENSMUSG00000002881	1832.91	1843.86	2162.04	2069.16	2346.26	2002.78	1950.97	1800.54
		ENSMUSG00000002885	3426.07	3249.43	4099.28	3783.09	4232.28	2906.77	3575.11	3426.31
		ENSMUSG00000002985	11138	11820.4	17681.5	17779.5	22689.8	11818.1	12920.2	12667.1
		ENSMUSG00000003032	2508.44	2979.32	3798.24	3370.66	3950.38	2571.86	2252.67	2396.62
		ENSMUSG00000003039	1667.57	1868.32	2070.17	2075.18	2272.43	1770.55	1820.24	1736.3
		ENSMUSG00000003161	2188.39	2035.48	2759.25	2580.93	2825.67	2042.13	2088.41	2008.37
		ENSMUSG00000003184	1366.41	1449.4	1756.42	1746.04	1968.48	1395.33	1436.41	1496.35
		ENSMUSG00000003200	786.543	913.264	1141.62	1027.56	1284.83	883.836	1027.45	861.538
		ENSMUSG00000003352	172.425	157.987	230.67	215.747	246.419	137.23	177.666	204.993
		ENSMUSG00000003380	6020.72	6055.47	7672.72	7701.65	7874.88	6467.07	6484.81	6465.31
		ENSMUSG00000003420	3651.64	3852.83	5150.98	5219.06	5128.79	3942.23	4121.52	4081.91
		ENSMUSG00000003429	11273.8	12136.4	17146.8	14919.6	15718.1	11723.1	12735.8	12157.9
		ENSMUSG00000003549	918.815	1061.06	1130.87	1247.32	1250.32	964.446	1059.29	953.17
		ENSMUSG00000003573	363.747	327.185	588.405	528.83	566.669	349.312	417.347	439.271
		ENSMUSG00000003873	897.557	969.324	1376.2	1280.43	1458.38	964.446	1087.79	1041.02
		ENSMUSG00000003970	16600.1	16467.3	21819.8	18982.7	20247.6	16401.3	16241.4	15973.4
		ENSMUSG00000004032	2180.12	2384.07	2692.78	2748.51	2763.35	2288.76	2370	2308.77
		ENSMUSG00000004044	10173.1	10695.2	14923.2	14525.3	15345.1	9974.58	11793	11451.3
		ENSMUSG00000004054	1723.07	1804.1	2495.34	2352.14	2552.41	1938.49	2223.34	2185.96
		ENSMUSG00000004096	2350.18	2331.07	2763.16	2616.05	2644.46	2182.24	2213.28	2228.47
		ENSMUSG00000004266	226.751	224.239	392.921	344.191	425.721	261.984	316.782	271.12
		ENSMUSG00000004285	1933.29	2067.08	2263.7	2391.27	2426.8	1872.27	2054.05	1929.01
		ENSMUSG00000004530	1732.52	1905.01	2392.71	2133.38	2514.05	1764.79	1989.52	1945.07
		ENSMUSG00000004631	751.114	744.066	1070.27	965.34	1098.82	701.502	790.278	822.806
		ENSMUSG00000004655	29211.9	31455.6	39154.3	48461.7	46631.8	29609.9	26967.5	26920.2
		ENSMUSG00000004730	958.969	1005	1253.05	1195.14	1498.65	884.795	1041.69	1007.96
		ENSMUSG00000004791	279.896	373.052	454.498	429.486	537.904	332.998	312.592	316.464
		ENSMUSG00000004814	107.471	104.985	204.28	165.573	168.754	108.44	108.108	99.1902
		ENSMUSG00000004837	681.435	632.965	1093.73	980.392	1153.47	619.932	740.834	811.47
		ENSMUSG00000004891	2896.98	3192.35	4605.58	3903.51	4869.9	2732.12	3348.84	3014.44
		ENSMUSG00000004945	3809.89	3740.71	4256.65	4247.7	4353.09	3674.49	3576.78	3610.52
		ENSMUSG00000005054	490.113	472.94	718.401	669.316	669.264	501.896	538.026	477.058
		ENSMUSG00000005125	2223.82	1975.34	2669.32	2463.52	2538.02	1886.67	2002.93	2145.34
		ENSMUSG00000005413	377.919	443.382	735.994	685.372	2648.29	414.568	508.695	373.144
		ENSMUSG00000005611	635.376	622.773	952.981	809.802	735.423	653.52	686.361	709.446
		ENSMUSG00000006057	66212.6	72925.6	83765.5	89652.2	91240.4	70631	74577.8	70659.3
		ENSMUSG00000006288	676.711	656.409	804.413	822.847	824.594	647.762	664.571	694.331
		ENSMUSG00000006315	4668.48	4816.04	5521.42	5709.76	5879.55	4790.56	4806.2	4656.27
		ENSMUSG00000006333	19432.1	19055.2	25377.6	20843.1	22826.9	18961.7	18648.2	18884.9
		ENSMUSG00000006344	557.43	503.518	680.282	690.389	684.605	533.564	507.018	575.303
		ENSMUSG00000006360	1997.06	1835.7	3247.95	2406.33	3072.09	1450.03	1814.37	1664.51
		ENSMUSG00000006373	1022.74	1025.38	1592.21	1306.52	1309.76	1094	1146.45	1072.2
		ENSMUSG00000006386	3989.41	3916.03	5320.08	4771.51	5442.32	3818.44	4129.9	4393.65
		ENSMUSG00000006390	773.553	825.607	1133.8	1086.76	1170.73	729.332	907.605	845.478
		ENSMUSG00000006498	1789.21	1951.9	2494.37	2299.96	2662.67	1857.88	2069.14	1991.36
		ENSMUSG00000006699	8839.76	8694.35	11182.6	10422.1	11463.8	8561.02	9405.4	9084.88
		ENSMUSG00000006728	2341.92	2414.65	2850.15	2651.17	2845.81	2363.61	2512.47	2527.93
		ENSMUSG00000006782	451.141	386.303	557.127	568.969	508.18	415.527	440.813	409.986
		ENSMUSG00000007039	790.086	855.166	1337.11	1031.57	1211.96	730.292	879.949	848.312
		ENSMUSG00000007041	2005.33	1948.84	2854.06	2408.33	3119.08	1699.54	2036.45	1919.57
		ENSMUSG00000007458	3217.03	3162.79	3924.33	3702.81	3913.95	3212.9	3360.57	3283.67
		ENSMUSG00000007589	534.991	503.518	696.898	639.212	629.952	539.322	602.556	500.674
		ENSMUSG00000007655	12838.6	12115	20916.7	17804.6	20353.1	12263.3	14336.5	14694.3
		ENSMUSG00000007721	1764.41	2075.23	2180.62	2328.06	2205.31	1912.58	1977.79	1992.31
		ENSMUSG00000007872	2095.09	2298.45	4456.04	3536.24	4156.53	2335.78	2243.45	2173.68
		ENSMUSG00000007892	22077.5	21087.6	33753.1	27467	30976	21080.6	21941.7	20172.5
		ENSMUSG00000008036	1874.24	2039.55	2281.29	2199.61	2361.6	1927.93	2084.22	1928.07
		ENSMUSG00000008333	922.358	866.378	1205.15	991.431	1141.01	858.885	848.942	848.312
		ENSMUSG00000008384	435.788	417.9	708.627	516.788	711.452	404.012	410.643	388.259
		ENSMUSG00000008393	1719.53	1841.82	2553.99	2383.25	2881.29	1634.28	1959.35	1796.76
		ENSMUSG00000008398	2194.29	2052.81	3287.05	2851.87	3088.39	1968.24	2624.76	2443.86
		ENSMUSG00000008475	2052.57	2134.35	3162.92	2677.26	3326.18	2094.91	2262.73	2106.61
		ENSMUSG00000008668	13424.4	13560.3	20794.5	16819.2	19342.5	13359.3	13010.7	12786.1
		ENSMUSG00000008682	18781.4	19213.2	29494.5	23327.7	27837.7	19789.9	19184.6	19195.7
		ENSMUSG00000008683	10779	9757.45	16316	12063.7	14288.5	9663.65	9263.77	9025.36
		ENSMUSG00000008734	839.688	783.817	1150.42	1173.06	1149.64	792.669	972.973	908.771
		ENSMUSG00000008822	448.779	488.229	560.059	589.038	586.804	449.115	481.039	451.552
		ENSMUSG00000009013	1667.57	1617.58	2580.38	2048.09	2475.7	1560.39	1568.82	1527.53
		ENSMUSG00000009281	1067.62	1054.94	1736.87	1482.13	1634.81	940.455	1092.81	1043.86
		ENSMUSG00000009563	500.742	494.345	608.93	639.212	657.758	486.541	504.504	528.07
		ENSMUSG00000009633	1595.53	1672.62	2767.07	2640.14	2845.81	2106.43	2043.16	1710.79
		ENSMUSG00000009687	881.023	848.031	1218.84	967.347	1454.55	686.148	890.006	661.268
		ENSMUSG00000009876	327.136	350.628	601.111	594.056	594.475	366.585	435.784	458.164
		ENSMUSG00000009927	11651.7	11389.3	18299.2	14219.2	16635.7	11013.9	10675.9	10312
		ENSMUSG00000010025	1757.32	1870.36	2121.97	2127.36	2037.52	1806.06	1768.28	1990.42
		ENSMUSG00000010067	1038.1	1041.69	1549.2	1325.59	1596.45	1011.47	1076.05	1140.21
		ENSMUSG00000010358	873.937	1073.29	1326.35	1193.13	1400.85	934.697	1050.07	979.621
		ENSMUSG00000010376	3298.52	3344.22	4048.46	3806.17	4221.73	3300.23	3514.77	3336.57
		ENSMUSG00000010538	142.901	136.582	235.557	188.653	209.025	130.512	161.743	174.764
		ENSMUSG00000010607	797.172	896.956	1007.72	1088.77	1164.02	770.597	894.196	785.964
		ENSMUSG00000011114	1620.33	1633.89	2217.76	1865.46	2096	1660.19	1821.08	1768.42
		ENSMUSG00000012405	14122.4	14710.1	19949.1	17288.8	19903.4	14404.3	14635.7	14093.5
		ENSMUSG00000012422	1130.21	1148.71	1408.46	1311.54	1447.83	1069.05	1122.15	1038.19
		ENSMUSG00000012428	2496.63	2690.87	3310.51	3134.85	3400.01	2471.09	2557.72	2867.07
		ENSMUSG00000012483	472.398	468.863	675.395	588.035	608.858	425.124	442.489	427.935
		ENSMUSG00000012848	13500	14631.6	21807.1	18614.4	21266.9	14223.9	14524.2	14187
		ENSMUSG00000013622	2390.34	2304.56	2841.35	2566.88	2856.36	2328.11	2302.12	2187.85
		ENSMUSG00000013698	6156.53	5936.22	8020.68	7297.25	8885.48	5468.07	6202.39	6049.66
		ENSMUSG00000013707	106.29	108.042	178.867	150.521	230.119	102.682	124.031	123.752
		ENSMUSG00000013822	1036.91	1117.12	1420.19	1383.79	1476.6	1047.94	1252.88	1092.98
		ENSMUSG00000014294	10897.1	10776.7	13764	13283	14116.9	10571.5	10689.3	10012.5
		ENSMUSG00000014313	44129.1	42508.6	58913.8	50400.4	58929.7	40995.2	40828.8	38455.6
		ENSMUSG00000014846	1269.57	1507.5	2049.64	1624.62	2776.77	956.769	1368.53	1387.72
		ENSMUSG00000014932	1069.98	1403.53	1591.23	1512.23	1557.14	1368.46	1279.7	1123.21
		ENSMUSG00000015013	1263.67	1283.26	1729.05	1618.6	1639.6	1298.4	1338.36	1282.86
		ENSMUSG00000015053	657.815	763.432	1082.98	1101.81	1016.36	739.888	748.376	807.692
		ENSMUSG00000015120	2683.22	2693.92	3243.07	2962.25	3248.52	2673.58	2888.75	2813.22
		ENSMUSG00000015247	264.543	294.568	424.199	338.17	388.326	267.742	284.098	311.741
		ENSMUSG00000015289	647.186	690.044	948.094	931.222	1031.7	726.453	781.06	722.671
		ENSMUSG00000015355	187.778	172.256	295.18	210.729	299.155	182.333	200.293	185.155
		ENSMUSG00000015396	361.385	453.574	633.366	567.965	848.565	335.877	399.748	414.709
		ENSMUSG00000015467	34.2489	44.8478	64.5095	74.257	75.7476	37.4263	54.4731	40.6207
		ENSMUSG00000015468	2516.7	2709.21	2950.82	3075.64	3253.31	2465.33	2555.21	2412.68
		ENSMUSG00000015575	1521.12	1647.14	2083.85	1843.38	2032.72	1493.21	1592.29	1501.08
		ENSMUSG00000015672	1437.27	1340.34	1684.09	1565.42	1749.87	1285.93	1283.89	1283.8
		ENSMUSG00000015766	751.114	770.567	1060.5	875.028	971.296	725.494	773.517	766.126
		ENSMUSG00000015804	1690.01	1760.28	2421.06	2038.05	2135.32	1594.93	1668.55	1602.16
		ENSMUSG00000015852	464.132	520.846	726.22	617.135	820.759	474.066	509.533	501.619
		ENSMUSG00000016087	798.353	923.457	1365.45	1160.01	1268.53	1063.29	900.063	935.222
		ENSMUSG00000016194	957.788	945.881	1227.63	1479.12	996.225	994.195	978.001	893.656
		ENSMUSG00000016206	250.371	280.299	459.386	348.205	399.832	256.226	277.394	310.796
		ENSMUSG00000016252	18349.1	17812.7	23424.8	21182.3	23435.7	17398.4	18157.1	16073.5
		ENSMUSG00000016256	1193.99	1328.11	1689.95	1674.8	1942.59	1203.4	1318.25	1256.41
		ENSMUSG00000016494	7452.09	7133.86	11539.4	9565.1	12650.8	6607.17	8347.79	7850.19
		ENSMUSG00000016503	905.824	935.688	1200.27	1075.72	1209.09	951.971	980.515	929.554
		ENSMUSG00000016559	5569.58	5629.42	8410.67	6763.4	7947.75	5208.01	6245.96	5604.72
		ENSMUSG00000016833	1328.62	1407.61	1721.23	1513.24	1672.2	1304.16	1285.56	1213.9
		ENSMUSG00000017309	4419.29	4638.69	7350.17	7740.79	5983.1	5021.84	5796.77	4938.73
		ENSMUSG00000017344	1356.96	1374.99	2010.54	1882.51	2015.46	1173.65	1445.63	1376.38
		ENSMUSG00000017404	16277.7	17047.3	22117	19337.9	21254.4	16514.6	16999.8	16921.8
		ENSMUSG00000017493	3491.02	3605.15	5057.15	4563.79	4726.08	3173.55	4098.05	3897.7
		ENSMUSG00000017707	22684.6	21987.6	27460.5	28452.5	26188.5	24173.5	22877.8	21321.2
		ENSMUSG00000017734	954.245	961.17	1291.17	1192.13	1303.05	942.374	918.5	890.822
		ENSMUSG00000017754	1416.01	1589.04	2249.03	2079.19	2176.55	1450.03	1795.93	1566.26
		ENSMUSG00000017778	31187.7	30262.1	41627.2	36474.2	42808.9	29463.1	30102.7	27605.1
		ENSMUSG00000018042	3990.59	3990.43	5765.78	5509.06	5402.05	4286.75	4697.25	4652.49
		ENSMUSG00000018169	537.353	523.904	889.449	785.719	771.859	579.627	638.592	563.967
		ENSMUSG00000018381	435.788	441.343	653.891	574.99	651.046	430.882	550.597	439.271
		ENSMUSG00000018449	457.046	418.919	581.563	526.823	668.305	391.536	470.144	439.271
		ENSMUSG00000018567	9840.06	10674.8	12956.6	11598.1	12888.6	10832.5	10818.3	10802.3
		ENSMUSG00000018585	1591.98	1617.58	2398.58	2254.8	2520.77	1611.25	1900.69	1710.79
		ENSMUSG00000018593	16826.8	18907.4	25617.1	26135.4	35662.7	15475.3	22838.5	17878.8
		ENSMUSG00000018604	517.276	593.214	779.001	783.712	791.035	533.564	638.592	552.631
		ENSMUSG00000018672	1321.53	1389.26	1592.21	1751.06	1739.32	1379.01	1512.67	1448.18
		ENSMUSG00000018752	364.928	364.898	613.817	522.809	588.722	444.317	445.003	405.263
		ENSMUSG00000018774	341.308	353.686	543.443	496.719	563.792	274.459	367.065	363.697
		ENSMUSG00000018819	1884.87	1835.7	2833.53	2125.35	2739.38	1944.25	2054.05	1819.43
		ENSMUSG00000018830	1231.78	991.748	1855.14	2115.32	1434.41	1263.86	1161.53	1041.97
		ENSMUSG00000018899	1211.7	1288.35	2055.51	1981.86	2173.67	1227.39	1540.33	1425.5
		ENSMUSG00000018920	586.955	568.751	739.904	704.438	912.807	520.129	599.204	556.41
		ENSMUSG00000018923	279.896	282.337	368.486	345.194	363.397	259.105	305.049	277.733
		ENSMUSG00000018986	301.154	308.838	475.024	392.358	539.822	277.338	314.268	322.132
		ENSMUSG00000019173	2406.87	2548.17	3332.99	3351.6	3610	2378.97	2747.96	2526.99
		ENSMUSG00000019254	3547.71	3815.12	4387.62	4193.51	4503.63	3907.69	3862.56	3927.93
		ENSMUSG00000019362	3780.37	4065.86	4871.44	4436.35	4842.1	4041.08	4119	3953.44
		ENSMUSG00000019539	882.204	943.842	1312.67	1201.16	1551.39	880.957	1076.89	1001.35
		ENSMUSG00000019578	3031.62	3207.64	3822.67	3768.04	3886.14	3178.35	3359.73	3329.96
		ENSMUSG00000019579	1432.55	1464.69	1676.27	1595.52	1861.09	1431.79	1490.89	1432.12
		ENSMUSG00000019659	1543.56	1820.41	2352.64	2072.17	2188.05	1851.16	1911.59	1859.11
		ENSMUSG00000019689	2841.48	2922.24	3414.11	3290.39	3504.53	2744.59	3008.59	2817
		ENSMUSG00000019699	1564.82	1510.55	2171.82	1931.68	1999.16	1724.49	1609.05	1623.89
		ENSMUSG00000019738	851.498	881.667	1110.34	1055.65	1126.63	813.781	887.492	931.443
		ENSMUSG00000019782	3814.62	3784.54	4779.56	4247.7	4781.69	3891.37	3702.49	3728.61
		ENSMUSG00000019868	1044	1081.44	1228.61	1275.41	1205.25	1052.73	1136.39	1085.42
		ENSMUSG00000019929	32041.6	30013.4	44004.3	38420.9	42669.9	28909.4	30513.3	30565.7
		ENSMUSG00000019960	1069.98	1032.52	1521.84	1167.04	1572.48	899.19	1085.27	881.376
		ENSMUSG00000019970	3812.26	3838.56	5085.5	5016.36	5384.79	2754.19	3069.77	2547.77
		ENSMUSG00000019978	2568.67	2503.32	3431.71	3100.73	3505.49	2607.36	2747.12	2740.48
		ENSMUSG00000019989	239.742	198.757	451.566	339.174	375.862	241.831	263.985	273.954
		ENSMUSG00000020009	2873.36	2986.45	3595.91	3611.5	4279.26	3010.41	2969.2	2813.22
		ENSMUSG00000020022	13652.3	15084.1	17945.4	17489.5	18209.2	15807.3	15680.7	15509.6
		ENSMUSG00000020056	1051.09	1153.81	1253.05	1377.77	1302.09	1024.9	1153.99	1013.63
		ENSMUSG00000020077	1437.27	1672.62	2739.7	2452.49	2632.95	1417.4	1483.34	1342.37
		ENSMUSG00000020092	1473.88	1268.99	1832.66	1807.25	2118.06	1540.23	1556.25	1548.31
		ENSMUSG00000020101	1235.32	1546.23	2329.18	2562.87	2364.48	1289.77	1732.24	1516.19
		ENSMUSG00000020120	286.982	304.761	565.924	355.229	519.686	288.854	346.951	275.843
		ENSMUSG00000020163	22221.6	24781.5	26970.8	26182.6	28446.6	23138.1	23962.3	22024.9
		ENSMUSG00000020178	362.566	458.671	694.943	739.559	721.041	503.815	592.499	535.627
		ENSMUSG00000020186	393.272	349.609	605.998	477.653	670.223	426.084	408.129	358.029
		ENSMUSG00000020224	644.824	604.426	889.449	773.677	871.577	665.996	634.402	625.371
		ENSMUSG00000020227	286.982	268.067	456.453	319.104	419.968	263.903	316.782	280.567
		ENSMUSG00000020253	381.462	408.726	607.953	555.924	594.475	417.447	440.813	434.547
		ENSMUSG00000020372	18457.8	18863.6	25563.3	22133.6	25085.9	18374.4	18261	18620.4
		ENSMUSG00000020376	2186.02	2290.29	2925.41	2595.98	2942.65	2306.99	2337.31	2359.78
		ENSMUSG00000020377	101.566	120.274	218.941	180.625	200.396	71.0139	123.193	95.4115
		ENSMUSG00000020395	385.005	351.647	507.279	515.785	524.48	389.617	398.072	414.709
		ENSMUSG00000020427	1290.83	1175.22	1957.76	1477.11	1890.81	1300.32	1206.79	1331.98
		ENSMUSG00000020460	11188.8	10626.9	16754.9	13121.4	15451.6	10585.9	10372.5	10131.6
		ENSMUSG00000020477	2830.85	2999.71	3864.7	3577.38	4195.84	2957.63	2968.36	3063.56
		ENSMUSG00000020485	967.236	1050.87	1454.4	1183.09	1296.34	933.737	1065.16	991.902
		ENSMUSG00000020486	1614.42	1702.18	2376.1	1970.82	2252.29	1672.67	1895.66	1912.01
		ENSMUSG00000020561	496.018	555.501	661.711	610.111	620.363	516.29	510.371	516.734
		ENSMUSG00000020577	2774.16	2588.94	3907.71	3230.18	3922.58	2570.9	2852.71	2917.14
		ENSMUSG00000020589	786.543	742.027	944.184	869.007	1009.65	799.387	763.461	826.585
		ENSMUSG00000020638	605.851	632.965	884.562	849.941	1053.75	553.717	736.643	711.335
		ENSMUSG00000020641	1362.87	1408.63	2464.07	1936.7	1873.56	1217.79	2037.29	1575.71
		ENSMUSG00000020642	1130.21	1286.32	1948.97	2000.92	1812.19	1351.18	1734.76	1483.13
		ENSMUSG00000020644	337.765	312.915	448.634	378.309	519.686	247.589	306.725	268.286
		ENSMUSG00000020676	116.919	63.1946	275.631	246.854	108.348	75.8122	137.44	137.922
		ENSMUSG00000020677	1169.19	1038.63	1338.08	1249.32	1276.2	1073.85	1058.45	1058.03
		ENSMUSG00000020717	9444.43	9198.89	13222.5	11992.5	13172.4	8641.63	10308.8	9714.97
		ENSMUSG00000020733	212.579	219.143	333.299	331.146	325.044	236.073	253.928	272.065
		ENSMUSG00000020736	266.905	240.547	398.786	381.319	445.856	273.5	316.782	323.077
		ENSMUSG00000020737	2998.55	3122.02	3876.43	3287.38	3579.32	2906.77	3182.06	3086.23
		ENSMUSG00000020738	5643.98	5251.27	6904.47	5933.53	6532.51	5195.53	4967.1	4878.27
		ENSMUSG00000020773	982.589	1011.11	1337.11	1204.17	1688.5	950.051	1108.74	1168.55
		ENSMUSG00000020801	494.837	518.807	612.84	579.004	696.111	453.913	449.193	419.433
		ENSMUSG00000020803	2442.3	2259.72	2989.92	2507.68	2938.82	2245.58	2208.25	2202.97
		ENSMUSG00000020811	396.815	381.206	708.627	619.142	584.887	467.348	512.885	478.002
		ENSMUSG00000020814	917.634	983.593	1193.43	1157	1365.37	863.683	947.831	919.162
		ENSMUSG00000020831	532.629	619.715	768.249	741.566	856.236	619.932	626.021	606.477
		ENSMUSG00000020844	533.81	664.563	1019.45	962.33	1046.08	594.022	683.008	726.45
		ENSMUSG00000020846	3005.64	3104.69	4067.03	4510.61	4656.08	2967.23	3928.76	3434.81
		ENSMUSG00000020857	27271.6	27830.1	31854	30297.8	33000.1	26767.5	26171.4	26003.9
		ENSMUSG00000020928	518.457	507.595	723.288	605.094	685.564	467.348	430.756	430.769
		ENSMUSG00000020974	33.0679	33.6358	72.3288	59.2049	60.4063	31.6684	48.6067	40.6207
		ENSMUSG00000021036	1329.8	1207.83	1551.16	1411.89	1577.28	1211.08	1375.24	1283.8
		ENSMUSG00000021040	1776.22	1696.06	2337	2214.66	2430.64	1611.25	1635.87	1521.86
		ENSMUSG00000021094	1382.95	1333.2	1847.32	1658.74	1700.97	1374.22	1545.36	1584.21
		ENSMUSG00000021108	1237.68	1067.17	1732.96	1499.19	1668.37	1199.56	1236.96	1301.75
		ENSMUSG00000021124	4372.05	4263.6	5484.28	4936.08	5299.46	4494.99	4484.39	4367.2
		ENSMUSG00000021131	1498.68	1483.03	1824.84	1654.73	1906.16	1474.98	1535.3	1508.64
		ENSMUSG00000021134	8485.46	7067.6	11198.3	10339.8	10301.7	8034.17	7841.61	6820.51
		ENSMUSG00000021242	3044.61	3059.84	4053.34	3614.51	4105.71	3260.88	3245.76	3059.78
		ENSMUSG00000021243	843.231	841.915	1065.38	950.288	1155.39	787.871	863.188	805.802
		ENSMUSG00000021256	726.313	701.256	955.913	863.99	1021.15	606.497	817.934	727.395
		ENSMUSG00000021290	12917.7	12998.7	17856.4	15395.3	18513.1	12240.3	12246.4	11333.2
		ENSMUSG00000021306	820.792	866.378	1209.06	1060.67	1122.79	879.997	983.029	963.562
		ENSMUSG00000021390	7650.49	7346.88	9447.7	9002.15	8617.97	7190.64	6698.51	6774.22
		ENSMUSG00000021408	712.141	681.89	896.291	798.764	1042.25	757.162	700.607	708.501
		ENSMUSG00000021411	478.303	513.711	745.769	645.233	846.648	472.147	461.764	457.22
		ENSMUSG00000021423	251.552	261.952	409.537	336.163	458.321	230.315	271.527	272.065
		ENSMUSG00000021474	441.693	481.094	718.401	713.469	599.269	486.541	562.33	517.678
		ENSMUSG00000021486	1645.13	1687.91	2239.26	1883.52	2328.04	1508.57	1710.45	1582.32
		ENSMUSG00000021537	1673.47	1665.48	2166.93	1830.33	2173.67	1588.22	1419.65	1554.92
		ENSMUSG00000021660	6784.82	6565.1	8146.76	7185.87	8022.54	6502.57	6478.1	6218.75
		ENSMUSG00000021701	1339.25	1555.4	2268.58	1912.62	2175.59	1450.99	1681.12	1702.29
		ENSMUSG00000021760	1258.94	1177.25	1557.02	1351.68	1741.24	1256.18	1159.02	1185.56
		ENSMUSG00000021764	14141.2	14269.8	16767.6	15206.6	16824.6	13698	12834.7	12800.3
		ENSMUSG00000021822	236.199	271.125	373.373	425.472	418.05	253.347	350.304	305.128
		ENSMUSG00000021871	1181	1196.62	1697.77	1681.82	1847.67	1027.78	1085.27	1032.52
		ENSMUSG00000021876	3075.31	2851.91	4448.22	4005.86	4510.34	2610.24	2948.25	2711.2
		ENSMUSG00000021895	2018.32	2032.42	2655.64	2500.65	2686.64	2027.74	2153.78	2146.29
		ENSMUSG00000021905	2352.54	2376.93	2710.37	2601	2867.86	2139.05	2206.58	2113.22
		ENSMUSG00000021957	1068.8	1124.25	1594.17	1501.19	1576.32	1248.5	1232.77	1169.5
		ENSMUSG00000021996	4574	4730.42	5433.46	5251.17	5609.16	4786.72	4701.44	4675.16
		ENSMUSG00000022014	92.1177	97.8497	143.68	135.469	177.384	81.5701	94.6993	95.4115
		ENSMUSG00000022018	1384.13	1285.3	1911.83	1920.65	1696.17	1265.78	1183.32	1099.59
		ENSMUSG00000022089	360.204	403.63	547.353	509.764	501.468	360.828	424.89	400.539
		ENSMUSG00000022090	317.688	267.048	511.189	383.326	442.021	261.984	327.676	252.226
		ENSMUSG00000022122	1158.56	1050.87	1369.36	1432.96	1623.3	1173.65	1060.97	963.562
		ENSMUSG00000022174	2626.54	2703.1	3310.51	3266.3	3324.27	2732.12	2873.66	2558.16
		ENSMUSG00000022204	1078.25	1034.56	1351.77	1196.14	1257.99	1098.8	1059.29	1076.92
		ENSMUSG00000022205	2437.58	2399.36	2986.98	2794.67	2938.82	2355.94	2310.5	2220.92
		ENSMUSG00000022215	4281.11	4717.17	5902.62	5904.43	6030.09	4920.11	5376.07	5041.7
		ENSMUSG00000022221	185.416	136.582	256.083	196.681	256.008	151.624	186.046	174.764
		ENSMUSG00000022261	2352.54	2411.59	2819.85	2747.51	2825.67	2547.86	2478.11	2374.9
		ENSMUSG00000022283	4739.34	5133.03	7148.82	5616.43	6326.37	5136.99	5621.62	5329.82
		ENSMUSG00000022329	470.037	412.803	669.53	579.004	616.528	508.613	514.561	431.713
		ENSMUSG00000022336	6021.9	5926.02	7330.62	6625.93	7151.92	6066.89	5536.14	5335.49
		ENSMUSG00000022338	1482.15	1364.8	1764.24	1556.39	1652.07	1424.12	1309.87	1330.09
		ENSMUSG00000022367	63.7738	63.1946	126.087	79.2743	115.06	64.2964	67.8818	53.8461
		ENSMUSG00000022425	762.924	698.198	1011.63	916.17	827.471	679.431	783.574	731.173
		ENSMUSG00000022440	418.073	470.902	548.33	625.163	825.553	395.375	581.605	465.722
		ENSMUSG00000022443	7100.15	6830.11	8313.9	8276.64	9236.42	6294.33	7199.66	6955.59
		ENSMUSG00000022450	12474.9	12638.9	15437.3	14563.4	15453.5	12479.3	12234.6	11768.7
		ENSMUSG00000022469	1907.31	2072.17	2294.97	2304.98	2475.7	1886.67	1893.15	1802.43
		ENSMUSG00000022489	128.729	129.447	174.957	198.688	193.684	132.431	159.229	125.641
		ENSMUSG00000022500	797.172	896.956	1175.83	1133.92	1602.21	780.194	962.078	837.921
		ENSMUSG00000022528	543.258	649.274	1065.38	753.608	1023.07	605.538	732.453	597.975
		ENSMUSG00000022548	298.792	205.892	427.131	392.358	360.52	273.5	281.584	260.728
		ENSMUSG00000022575	454.684	405.669	666.598	585.024	699.946	399.213	491.096	440.216
		ENSMUSG00000022579	4030.74	4029.17	6582.9	6598.83	6548.81	4204.22	4277.39	3899.59
		ENSMUSG00000022587	6928.9	7170.55	10731.1	10134.1	10469.5	6330.8	8860.67	8069.36
		ENSMUSG00000022661	2393.88	2391.2	4119.81	3570.35	3893.81	2616.96	2703.54	2737.65
		ENSMUSG00000022676	196.045	186.526	270.744	225.781	263.678	197.687	212.864	192.712
		ENSMUSG00000022677	3276.08	3216.81	3805.08	3624.54	3819.98	3113.1	3121.73	2991.77
		ENSMUSG00000022681	1310.91	1409.65	1734.91	1625.63	1834.24	1473.06	1365.18	1381.11
		ENSMUSG00000022754	141.72	117.216	201.348	166.576	236.831	126.673	133.249	134.143
		ENSMUSG00000022799	3838.24	3465.51	4720.92	4271.78	4321.45	3659.14	3750.26	3879.75
		ENSMUSG00000022820	11508.8	11359.7	14668.1	12877.6	14682.6	10982.2	10633.1	10223.2
		ENSMUSG00000022831	488.932	522.884	643.14	664.299	817.883	482.703	606.746	448.718
		ENSMUSG00000022836	1622.69	1448.38	1864.91	2044.07	1771.92	1486.49	1450.66	1427.39
		ENSMUSG00000022890	34674	33767.3	43431.5	37560	41240.3	32748.9	32182.7	30747.1
		ENSMUSG00000022895	4325.99	4608.11	5833.22	5513.08	5613.95	4445.09	5278.86	4966.12
		ENSMUSG00000022912	1367.59	1331.16	1857.09	1672.79	1802.6	1262.9	1355.96	1354.65
		ENSMUSG00000022940	3219.4	3085.32	4065.07	3503.12	3772.04	3004.66	2896.29	2910.52
		ENSMUSG00000022941	237.38	289.472	389.989	452.566	375.862	272.54	313.43	273.954
		ENSMUSG00000022956	48492.9	48871.9	58496.4	56166.4	59920.2	45987.3	47063	45762.6
		ENSMUSG00000022971	1249.49	1336.26	1787.69	1639.67	1904.24	1472.1	1589.78	1552.09
		ENSMUSG00000022978	161.796	182.449	257.06	223.774	262.72	176.575	218.73	156.815
		ENSMUSG00000023004	13204.7	13145.5	18251.3	14579.4	17437.3	12692.3	12985.5	14005.7
		ENSMUSG00000023008	1734.88	1596.17	2196.25	2141.41	2430.64	1877.07	2059.08	1868.55
		ENSMUSG00000023022	1366.41	1438.19	2051.6	1549.36	1892.73	1338.71	1511.84	1413.22
		ENSMUSG00000023046	560.973	555.501	856.217	922.191	803.5	520.129	636.916	585.694
		ENSMUSG00000023064	278.715	314.954	523.895	477.653	344.22	313.805	298.345	318.353
		ENSMUSG00000023224	4914.13	4792.6	7147.84	6691.15	7029.19	4410.54	5014.04	4887.71
		ENSMUSG00000023367	448.779	448.478	581.563	698.417	728.711	434.72	569.034	443.05
		ENSMUSG00000023913	406.263	450.516	729.152	623.156	770.9	450.075	476.849	438.326
		ENSMUSG00000023915	940.073	884.725	1285.3	1108.84	1305.93	998.034	978.001	925.775
		ENSMUSG00000023947	87.3937	81.5414	137.816	134.465	138.072	73.8929	112.298	76.5181
		ENSMUSG00000024038	11135.6	12603.2	14990.6	16210.1	16916.7	10745.2	12165.1	10698.4
		ENSMUSG00000024067	967.236	1070.23	1319.51	1130.91	1291.54	973.083	1014.04	975.843
		ENSMUSG00000024070	2158.86	1944.76	2387.83	2246.77	2365.44	2083.4	2063.27	2031.04
		ENSMUSG00000024084	243.285	255.836	372.396	293.014	394.079	170.817	207.836	188.934
		ENSMUSG00000024085	1869.52	1955.98	2139.56	2264.84	2281.06	1797.42	1938.4	1728.74
		ENSMUSG00000024145	118.1	95.8112	142.703	146.507	197.519	105.561	112.298	111.471
		ENSMUSG00000024168	2843.84	2598.11	4170.63	3682.74	4053.94	2679.34	2571.97	2651.68
		ENSMUSG00000024208	4009.48	4356.35	5228.2	4883.9	5125.91	4016.13	4059.5	3692.71
		ENSMUSG00000024338	643.643	665.582	1058.54	953.299	1173.61	559.475	839.723	748.177
		ENSMUSG00000024346	3648.1	3446.14	4338.75	3969.74	4304.19	3398.11	3372.3	3372.47
		ENSMUSG00000024349	348.394	322.089	605.021	507.757	699.946	338.756	391.368	358.029
		ENSMUSG00000024378	649.548	651.312	1067.34	781.705	923.354	751.404	729.939	759.513
		ENSMUSG00000024395	3700.06	3977.18	5737.43	5733.84	5103.86	3634.19	4170.96	3995
		ENSMUSG00000024414	1691.19	1830.61	2106.33	1974.83	2127.65	1787.82	1837.84	1704.18
		ENSMUSG00000024446	702.693	712.468	875.765	1005.48	901.301	682.31	723.235	660.323
		ENSMUSG00000024451	4194.9	4198.36	4759.04	4746.42	5099.06	3986.38	4186.05	4366.26
		ENSMUSG00000024474	3643.37	3743.77	4425.74	4360.09	4631.15	3662.98	3707.52	3771.12
		ENSMUSG00000024538	1215.25	1094.69	1624.47	1400.85	1809.31	1190.92	1310.71	1162.89
		ENSMUSG00000024560	1671.11	1721.54	1949.95	2232.73	2133.4	1728.33	1945.95	1749.53
		ENSMUSG00000024608	16683.9	17316.3	28867	23256.5	27543.4	17533.7	17450.7	17201.5
		ENSMUSG00000024621	2654.88	2762.22	3481.56	3419.83	3960.93	2600.65	2755.5	2801.89
		ENSMUSG00000024646	2744.64	2804.01	3937.03	3772.05	3960.93	2902.93	3029.54	3017.27
		ENSMUSG00000024659	1198.71	1231.28	2115.13	1707.91	2094.09	1031.62	1348.42	1089.2
		ENSMUSG00000024663	478.303	512.692	876.742	697.413	939.654	479.824	637.754	576.248
		ENSMUSG00000024678	661.358	650.293	1054.63	933.229	970.337	720.695	761.785	582.86
		ENSMUSG00000024691	596.403	550.405	900.2	777.691	1105.53	549.878	572.386	513.9
		ENSMUSG00000024725	1893.14	1817.35	2552.03	2283.9	2426.8	1851.16	1958.52	1892.17
		ENSMUSG00000024737	158.253	196.719	274.654	284.986	372.026	153.544	274.041	216.329
		ENSMUSG00000024818	310.602	318.012	464.273	427.479	541.739	305.168	333.543	323.077
		ENSMUSG00000024835	1120.77	1112.02	1585.37	1440.99	1602.21	1138.14	1325.79	1217.68
		ENSMUSG00000024844	2441.12	2611.36	2856.99	2795.67	3004.98	2474.93	2747.96	2495.81
		ENSMUSG00000024885	100.385	102.946	192.551	151.524	178.343	111.319	108.108	129.42
		ENSMUSG00000024959	786.543	744.066	1018.47	928.212	1003.9	736.05	853.132	816.194
		ENSMUSG00000024963	1394.76	1490.17	1782.81	1663.76	1822.74	1453.87	1524.41	1524.69
		ENSMUSG00000024965	302.335	291.511	396.831	383.326	427.639	289.814	313.43	289.069
		ENSMUSG00000024981	1245.95	1277.14	1877.62	1653.72	1993.41	1200.52	1405.4	1216.73
		ENSMUSG00000024986	132.272	138.62	282.473	265.92	245.461	173.696	176.828	151.147
		ENSMUSG00000025076	490.113	489.249	708.627	637.205	668.305	498.057	595.013	538.461
		ENSMUSG00000025144	851.498	915.303	1152.37	1113.85	1250.32	903.988	972.973	903.103
		ENSMUSG00000025150	1034.55	1116.1	1641.08	1592.51	1864.93	908.786	1047.56	975.843
		ENSMUSG00000025212	671.987	589.137	797.572	766.653	884.042	630.489	725.749	657.489
		ENSMUSG00000025283	1594.34	1430.03	2503.16	2057.12	2629.11	1617.97	1545.36	1284.75
		ENSMUSG00000025289	723.951	760.374	1188.54	973.368	1141.01	784.032	752.566	774.628
		ENSMUSG00000025290	20574.1	19307	31411.2	23772.3	28913.5	19694.8	18429.5	18473.9
		ENSMUSG00000025362	4840.9	4783.42	6980.71	6175.37	7067.54	4639.9	5019.06	4906.61
		ENSMUSG00000025381	1328.62	1421.88	1738.82	1625.63	1767.13	1328.15	1516.03	1367.88
		ENSMUSG00000025402	374.376	413.823	667.575	626.167	684.605	528.766	516.237	542.24
		ENSMUSG00000025484	726.313	806.241	1051.7	986.413	1099.78	785.951	830.505	853.036
		ENSMUSG00000025488	23035.3	24528.7	28862.1	28861.9	30507.1	21386.7	23796.3	21380.7
		ENSMUSG00000025491	122.824	106.004	211.122	154.535	223.408	102.682	123.193	135.088
		ENSMUSG00000025492	2323.02	2611.36	4883.17	4113.23	5146.04	2248.45	3176.2	2850.06
		ENSMUSG00000025494	374.376	337.378	514.121	433.5	496.674	360.828	408.967	380.701
		ENSMUSG00000025498	566.878	791.971	1427.03	1184.1	1423.86	784.992	1267.13	875.708
		ENSMUSG00000025572	555.068	584.04	830.804	863.99	818.841	602.659	648.648	584.75
		ENSMUSG00000025597	321.231	298.645	495.55	391.354	465.992	217.84	294.993	327.8
		ENSMUSG00000025608	8640.17	9054.16	14127.6	13833.9	13264.5	8870.02	10835.9	9990.81
		ENSMUSG00000025610	42.5159	36.6936	75.261	102.354	66.1593	45.1034	53.635	48.1781
		ENSMUSG00000025647	1515.22	1646.12	2328.21	2146.43	2622.4	1495.13	1743.98	1630.5
		ENSMUSG00000025743	3439.06	3680.58	4613.4	4627.01	4845.93	3539.18	4174.31	4148.04
		ENSMUSG00000025784	1795.11	1975.34	2908.79	2378.23	3297.42	1626.6	2138.7	2108.5
		ENSMUSG00000025794	11801.7	11545.2	15589.8	13179.6	14436.2	11140.6	11053	10803.2
		ENSMUSG00000025880	492.475	547.347	778.023	608.104	782.406	503.815	506.18	591.362
		ENSMUSG00000025888	138.177	133.524	282.473	161.559	255.049	142.988	179.342	125.641
		ENSMUSG00000025902	546.801	580.983	742.836	672.326	724.876	540.282	489.419	562.078
		ENSMUSG00000025967	9613.31	9437.4	12030	10208.3	11307.5	8895.93	8809.55	8417.94
		ENSMUSG00000026029	507.828	566.713	789.752	673.33	860.071	463.51	619.317	483.67
		ENSMUSG00000026072	944.797	876.57	1085.91	1029.56	1165.94	902.069	850.618	895.546
		ENSMUSG00000026078	2708.02	2482.94	3645.76	3091.7	3381.8	2928.84	2616.38	2789.61
		ENSMUSG00000026087	8681.5	9377.26	11960.6	10730.1	11953.7	9210.7	8670.43	8562.47
		ENSMUSG00000026088	224.389	222.2	384.125	307.063	332.714	225.517	232.977	221.997
		ENSMUSG00000026111	1352.24	1358.68	1595.14	1556.39	1625.22	1269.61	1274.67	1179.89
		ENSMUSG00000026154	1754.96	1717.47	2231.44	2143.42	2232.16	1768.63	1746.49	1685.29
		ENSMUSG00000026177	271.629	276.222	387.057	354.226	469.827	245.67	284.098	276.788
		ENSMUSG00000026222	1842.35	2040.57	2454.29	2322.03	2475.7	1882.83	1974.44	2103.78
		ENSMUSG00000026238	9215.31	8722.89	13491.3	10705	12911.6	7954.52	8857.32	8078.8
		ENSMUSG00000026249	1438.45	1324.03	1914.76	1709.92	1736.44	1400.13	1531.95	1574.76
		ENSMUSG00000026255	172.425	181.43	295.18	239.83	281.896	133.391	210.35	166.262
		ENSMUSG00000026278	218.484	209.969	314.728	274.951	315.455	207.284	253.09	224.831
		ENSMUSG00000026315	168.882	144.736	263.902	213.74	244.502	170.817	187.723	185.155
		ENSMUSG00000026355	467.675	480.075	714.491	585.024	702.823	482.703	557.301	533.738
		ENSMUSG00000026360	2291.13	2628.69	3467.87	3061.59	3610.96	2651.51	2822.54	2259.65
		ENSMUSG00000026385	4806.65	5223.75	5946.6	6031.87	6403.07	5116.84	5507.65	4642.1
		ENSMUSG00000026399	885.747	845.992	1321.47	988.42	1373.05	707.26	912.633	808.636
		ENSMUSG00000026421	2175.4	2037.52	3237.2	2754.53	3189.07	1923.13	2359.94	2075.44
		ENSMUSG00000026463	1614.42	1606.37	2099.49	2036.05	1980.94	1531.6	1727.21	1737.25
		ENSMUSG00000026475	64.9548	76.4451	231.648	93.3229	189.848	69.0946	91.3471	88.7988
		ENSMUSG00000026480	346.032	318.012	544.421	433.5	495.715	347.392	363.712	358.029
		ENSMUSG00000026483	1160.92	1077.37	1699.73	1543.34	1520.71	1351.18	1396.19	1414.17
		ENSMUSG00000026500	2333.65	2391.2	2980.14	2501.66	2893.75	2259.97	2110.2	2083.94
		ENSMUSG00000026511	3042.25	2922.24	3722	3364.64	3635.89	3075.67	2912.21	2909.58
		ENSMUSG00000026536	558.611	533.077	771.181	598.07	922.395	546.04	453.383	472.334
		ENSMUSG00000026547	3587.87	3743.77	5020.99	4449.4	6321.57	2785.86	4023.46	3594.46
		ENSMUSG00000026548	192.502	156.967	364.576	322.115	284.773	186.172	214.54	187.989
		ENSMUSG00000026566	739.304	730.815	1101.55	905.132	1168.81	782.113	798.659	840.755
		ENSMUSG00000026574	4859.8	4964.85	7025.67	6191.42	7047.41	3866.42	5107.06	4322.8
		ENSMUSG00000026655	335.403	351.647	491.64	370.281	469.827	339.715	355.332	326.855
		ENSMUSG00000026678	37247.4	36527.5	61626.1	52618.1	52376.1	36971.4	36902.6	37586.5
		ENSMUSG00000026712	2026.59	1823.47	2509.03	2214.66	2597.47	1807.98	1916.61	2098.11
		ENSMUSG00000026727	1576.63	1372.95	2231.44	1960.78	2128.6	1458.66	1511.84	1542.64
		ENSMUSG00000026728	9958.16	9606.6	12509.9	10555.5	14824.5	8141.65	10732.9	10133.5
		ENSMUSG00000026819	640.1	579.963	984.258	1013.51	888.836	650.641	581.605	578.137
		ENSMUSG00000026849	439.331	464.786	551.263	519.799	601.187	424.164	447.517	452.496
		ENSMUSG00000026896	573.964	606.464	905.087	767.656	885.96	595.941	698.093	672.604
		ENSMUSG00000026921	5205.83	5221.71	9438.91	8001.69	9128.07	5290.54	5707.1	5491.36
		ENSMUSG00000026946	520.819	471.921	720.356	597.066	682.687	468.308	522.941	450.607
		ENSMUSG00000026966	1221.15	1276.12	1529.66	1415.9	1680.83	1212.04	1205.95	1286.64
		ENSMUSG00000027006	2648.97	2715.33	3143.37	2973.29	3063.46	2677.42	2623.09	2678.14
		ENSMUSG00000027007	2163.59	2058.92	2593.08	2244.77	2508.3	2205.27	2178.08	2110.39
		ENSMUSG00000027074	4465.35	4768.14	5798.03	6383.09	6071.32	4225.33	4122.35	3931.71
		ENSMUSG00000027109	2607.64	2684.75	3218.63	2962.25	3237.97	2666.86	2728.68	2692.31
		ENSMUSG00000027133	1914.39	1914.19	2347.75	2340.1	2574.46	1829.09	1844.54	1860.05
		ENSMUSG00000027170	6532.09	6427.5	8058.8	7316.32	7546.96	6423.88	6195.68	6137.51
		ENSMUSG00000027223	266.905	304.761	432.018	361.25	396.956	278.298	331.029	325.911
		ENSMUSG00000027314	1202.25	1306.7	2007.61	1650.71	2018.34	1454.83	1304	1400.94
		ENSMUSG00000027330	159.434	177.353	334.276	265.92	241.625	162.18	209.512	169.096
		ENSMUSG00000027333	1035.73	1031.5	1441.69	1204.17	1575.36	1041.22	1150.64	1133.6
		ENSMUSG00000027342	1878.97	1985.53	2713.31	2428.4	2623.36	1937.53	2056.57	1998.92
		ENSMUSG00000027364	1632.14	1599.23	1899.12	1879.5	2034.64	1495.13	1666.04	1551.15
		ENSMUSG00000027398	115.738	95.8112	304.954	198.688	378.738	102.682	165.933	128.475
		ENSMUSG00000027405	1466.8	1394.36	1672.36	1599.53	1865.88	1412.6	1339.2	1270.58
		ENSMUSG00000027435	6213.22	6047.32	7826.17	7278.18	8661.12	4996.89	6730.36	5971.25
		ENSMUSG00000027474	1283.74	1209.87	1518.9	1450.02	1473.72	1301.28	1122.98	1344.26
		ENSMUSG00000027500	414.53	362.859	749.678	547.896	507.221	479.824	478.525	443.05
		ENSMUSG00000027502	1759.68	1779.64	2062.35	2107.29	2032.72	1763.83	1870.52	1816.6
		ENSMUSG00000027533	2015.96	2008.98	3819.74	2694.32	4094.21	1798.38	2459.67	2108.5
		ENSMUSG00000027552	232.656	236.47	360.667	308.066	334.632	262.943	251.414	257.894
		ENSMUSG00000027562	311.783	243.605	539.534	376.302	348.056	329.159	314.268	308.907
		ENSMUSG00000027611	36.6109	40.7707	73.3062	61.2118	78.6241	37.4263	52.797	34.9527
		ENSMUSG00000027613	1235.32	1371.93	1743.71	1716.94	1813.15	1441.39	1475.8	1416.06
		ENSMUSG00000027669	1199.89	1103.87	1447.55	1262.37	1450.71	1175.57	1143.93	1263.97
		ENSMUSG00000027679	2708.02	2487.01	3496.22	2849.86	3353.99	2512.36	2408.55	2195.41
		ENSMUSG00000027712	5678.23	5944.37	7614.07	6959.08	7966.92	5251.19	5790.07	5370.44
		ENSMUSG00000027800	3842.96	3461.43	6667.93	4503.58	6026.25	3067.99	3785.46	3582.18
		ENSMUSG00000027827	43.6969	28.5395	77.2159	90.3125	65.2005	27.8298	46.0926	37.7867
		ENSMUSG00000027829	1973.44	1822.45	2336.02	2083.21	2398.04	1915.46	1680.28	1650.34
		ENSMUSG00000027834	610.575	533.077	735.017	749.594	673.099	476.945	444.165	497.84
		ENSMUSG00000027835	1192.81	1122.21	1612.74	1232.26	1521.66	1185.16	1066	1029.69
		ENSMUSG00000027859	213.76	212.008	378.26	357.236	325.044	236.073	262.309	254.116
		ENSMUSG00000027889	410.987	400.572	531.714	467.618	538.863	387.698	364.55	428.879
		ENSMUSG00000027907	1314.45	1368.88	2246.1	1996.91	2356.81	1171.73	1505.97	1323.48
		ENSMUSG00000027937	2092.73	2138.42	2610.68	2605.01	2551.45	2129.46	2111.88	2049.93
		ENSMUSG00000027940	3161.53	3093.48	4385.67	3848.32	4598.55	3000.82	3441.02	3151.41
		ENSMUSG00000027953	944.797	917.341	1213.95	1158.01	1193.74	907.827	979.677	966.396
		ENSMUSG00000027994	83.8507	116.197	173.003	147.51	161.084	78.6911	106.432	84.0755
		ENSMUSG00000027995	211.398	197.738	363.599	270.938	461.198	191.93	273.203	257.894
		ENSMUSG00000028003	21.2579	27.5202	27.3677	77.2674	125.607	20.1526	47.7687	25.506
		ENSMUSG00000028005	1129.03	1195.6	1814.08	1749.05	1613.71	1244.66	1211.82	1184.61
		ENSMUSG00000028015	1052.27	1060.04	1513.04	1268.39	1428.66	998.993	1159.02	979.621
		ENSMUSG00000028024	857.403	843.954	1265.75	1170.05	1131.42	822.418	966.268	887.044
		ENSMUSG00000028037	311.783	379.168	509.234	510.767	632.828	283.096	459.25	348.583
		ENSMUSG00000028041	3770.92	3999.61	5256.54	5061.51	5848.87	3465.29	4406.45	3753.17
		ENSMUSG00000028048	596.403	622.773	725.243	731.531	784.324	564.273	654.515	590.418
		ENSMUSG00000028062	1612.06	1726.64	1930.4	1911.61	1917.66	1647.72	1743.14	1701.35
		ENSMUSG00000028081	23277.4	23866.2	35163.5	28856.9	32787.2	23396.2	22466.4	22520
		ENSMUSG00000028116	57494.4	60526.2	72302.4	65235.7	84041.5	57085.6	57266.3	54120.1
		ENSMUSG00000028234	7349.34	6997.27	11407.4	8978.07	10371.7	7279.89	7076.47	6773.27
		ENSMUSG00000028249	6104.57	5997.37	7106.79	6863.75	7709.96	5828.9	5864.65	5655.73
		ENSMUSG00000028268	695.607	959.131	1355.68	1305.52	1466.05	765.799	1056.78	1045.75
		ENSMUSG00000028270	943.616	1245.55	1536.5	1529.29	1681.79	860.804	1161.53	1189.34
		ENSMUSG00000028312	230.294	246.663	343.073	322.115	322.167	251.428	262.309	221.052
		ENSMUSG00000028382	2234.44	2044.65	2809.09	2587.96	2750.89	2045.97	2053.22	1990.42
		ENSMUSG00000028419	1969.9	1895.84	2427.9	2235.74	2443.1	1808.94	1820.24	1812.82
		ENSMUSG00000028427	1116.04	1363.78	2139.56	2446.47	1680.83	1625.64	1698.72	1536.98
		ENSMUSG00000028447	1524.67	1611.46	1777.92	1865.46	1820.82	1505.69	1635.03	1618.22
		ENSMUSG00000028466	1098.33	1166.04	1296.05	1350.67	1423.86	1156.38	1159.02	1064.64
		ENSMUSG00000028470	2940.68	3059.84	3531.4	3817.21	3689.58	3167.8	3237.38	3172.2
		ENSMUSG00000028478	2894.62	2976.26	3486.44	3314.47	3479.6	2871.27	2997.69	3020.11
		ENSMUSG00000028495	18386.9	18327.5	25845.8	21523.5	23845.2	18109.5	18044	17808.9
		ENSMUSG00000028581	1069.98	1233.31	1601.99	1480.12	1795.89	1067.13	1369.37	1154.38
		ENSMUSG00000028597	262.181	301.703	430.063	416.441	473.662	342.594	367.065	326.855
		ENSMUSG00000028639	30456.7	31632	39675.3	33717.7	39514.4	31954.3	32254.8	31838.2
		ENSMUSG00000028651	838.507	828.665	1035.08	988.42	1041.29	832.015	921.014	837.921
		ENSMUSG00000028656	2679.68	2544.09	3376	2880.97	3572.6	2415.43	2751.31	2720.65
		ENSMUSG00000028680	218.484	184.487	360.667	246.854	300.114	201.526	186.884	187.044
		ENSMUSG00000028684	2932.41	3076.15	3384.79	3586.41	3470.01	2989.3	3101.61	3081.51
		ENSMUSG00000028688	376.738	322.089	580.585	461.597	509.139	413.608	424.052	409.986
		ENSMUSG00000028691	18653.8	19204	22483.5	21048.8	23259.3	19106.6	18533.4	18571.2
		ENSMUSG00000028717	359.023	334.32	515.098	424.469	469.827	348.352	337.733	341.97
		ENSMUSG00000028776	2643.07	3413.53	4118.83	4267.77	4491.16	2987.38	3338.78	2890.69
		ENSMUSG00000028795	392.091	428.093	527.805	510.767	541.739	367.545	420.7	456.275
		ENSMUSG00000028798	4920.03	5125.9	5728.64	5688.68	6029.13	5128.36	5086.95	5197.57
		ENSMUSG00000028800	1124.31	1081.44	1464.17	1355.69	1447.83	1150.62	1200.92	1268.69
		ENSMUSG00000028821	2568.67	2561.42	3382.84	3192.05	3078.81	2803.13	2719.46	2614.84
		ENSMUSG00000028822	2217.91	2352.47	3100.36	2750.52	2795.95	2233.1	2214.96	2209.58
		ENSMUSG00000028843	761.743	851.089	1206.13	1021.53	1268.53	768.678	890.006	903.103
		ENSMUSG00000028848	289.344	329.224	411.492	347.201	416.133	304.208	339.409	305.128
		ENSMUSG00000028894	850.317	814.395	992.077	993.438	980.884	852.167	841.399	835.087
		ENSMUSG00000028898	937.711	1006.02	1370.34	1246.31	1394.14	1048.89	1073.54	1022.13
		ENSMUSG00000028923	747.571	759.355	1125.01	1013.51	1155.39	780.194	888.33	820.917
		ENSMUSG00000028936	7753.24	7055.37	9846.49	8355.91	8909.46	7196.4	6973.39	7128.47
		ENSMUSG00000028970	487.751	480.075	726.22	696.41	611.734	552.757	494.448	566.801
		ENSMUSG00000028978	2276.96	2298.45	3048.56	2724.43	3206.33	2285.88	2573.64	2509.98
		ENSMUSG00000028988	1731.34	1669.56	2487.52	2377.23	2618.57	1822.37	2042.32	1920.51
		ENSMUSG00000028996	727.494	775.663	1350.79	1346.66	1249.36	818.579	755.918	512.955
		ENSMUSG00000028998	3331.59	3183.17	4325.07	3761.01	4389.53	3040.16	3119.21	2739.54
		ENSMUSG00000029038	1698.27	1857.11	2221.67	2168.5	2316.54	1780.15	1899.85	1812.82
		ENSMUSG00000029063	2121.07	2149.64	2660.53	2511.69	2851.56	2189.92	2333.96	2179.35
		ENSMUSG00000029064	6114.02	6320.48	7234.83	7142.72	7633.25	6230.99	6810.81	6427.52
		ENSMUSG00000029066	2310.03	2051.79	2626.32	2414.35	2790.2	2029.65	1962.71	2010.25
		ENSMUSG00000029070	1478.61	1459.59	2004.68	1834.35	2016.42	1488.41	1715.48	1722.13
		ENSMUSG00000029076	5323.93	5225.79	6445.08	5898.41	6310.06	5208.01	5402.89	5298.65
		ENSMUSG00000029084	689.702	848.031	1090.8	1176.07	1018.28	621.852	776.032	669.77
		ENSMUSG00000029126	214.941	195.699	289.315	272.944	286.69	185.212	227.111	213.495
		ENSMUSG00000029171	376.738	368.975	521.94	423.465	493.798	336.836	432.432	357.085
		ENSMUSG00000029174	838.507	851.089	1079.07	996.448	989.513	870.4	892.52	865.316
		ENSMUSG00000029234	1073.53	1128.33	1464.17	1187.11	1413.32	1156.38	1058.45	1084.48
		ENSMUSG00000029298	1609.7	1927.44	2503.16	2455.5	2627.2	1735.04	1730.57	2194.46
		ENSMUSG00000029309	19488.8	18507.9	29360.6	26174.6	26535.6	19463.6	20196.9	21343.8
		ENSMUSG00000029373	529.086	541.231	1294.1	900.115	1181.28	441.438	654.515	558.299
		ENSMUSG00000029380	74.4028	55.0405	167.138	78.2708	115.06	59.4982	71.234	60.4588
		ENSMUSG00000029417	328.317	390.38	547.353	654.264	636.664	341.635	409.805	368.421
		ENSMUSG00000029428	1058.17	1065.13	1318.53	1335.62	1312.64	992.276	1083.59	1133.6
		ENSMUSG00000029465	3500.47	3353.39	4067.03	3692.78	4202.56	3062.24	3375.65	3187.31
		ENSMUSG00000029484	1669.93	1577.83	2332.11	2142.41	2592.68	1284.01	1563.8	1376.38
		ENSMUSG00000029552	255.095	249.721	326.457	314.087	378.738	231.275	272.365	220.108
		ENSMUSG00000029561	538.534	645.197	941.252	855.962	1021.15	544.12	771.003	695.276
		ENSMUSG00000029580	13634.6	12761.2	20549.2	16600.4	20996.5	11390.1	14359.1	13224.4
		ENSMUSG00000029614	17004	17325.5	23116.9	19923.9	22269.8	16760.2	16656.2	16596.9
		ENSMUSG00000029622	2594.65	2723.48	4035.75	3590.42	4633.07	2584.33	2954.95	2610.12
		ENSMUSG00000029625	441.693	493.326	618.704	620.146	560.916	488.461	518.751	512.01
		ENSMUSG00000029632	46198.2	46209.5	61602.6	53501.1	61742.9	44013.3	42470.5	40667
		ENSMUSG00000029659	1322.72	1262.87	1849.27	1498.18	1963.69	1118.95	1341.71	1205.4
		ENSMUSG00000029669	1852.98	1824.49	2095.58	2298.96	2158.33	1987.43	1838.68	1784.48
		ENSMUSG00000029710	2871	2973.2	3889.14	4016.9	4279.26	2992.18	3587.68	3310.12
		ENSMUSG00000029718	1933.29	2209.77	2677.14	2769.58	3126.75	1836.77	2316.36	2106.61
		ENSMUSG00000029752	124.005	148.813	205.257	174.604	257.925	107.481	170.962	130.364
		ENSMUSG00000029761	3721.32	3504.24	4347.55	4262.75	4389.53	3250.33	3567.57	3262.88
		ENSMUSG00000029762	147.625	174.295	296.157	235.816	243.543	189.051	201.969	187.044
		ENSMUSG00000029810	1459.71	1468.76	1713.41	1843.38	2112.3	1384.77	1693.69	1549.26
		ENSMUSG00000029863	713.322	699.218	888.471	886.066	831.306	712.059	724.911	735.897
		ENSMUSG00000029915	72.0408	79.5029	183.754	102.354	148.619	96.9244	100.566	85.0202
		ENSMUSG00000029918	3486.3	3630.63	4269.35	4200.54	4469.11	3504.63	3344.65	3248.71
		ENSMUSG00000030047	245.647	278.26	418.334	341.181	385.45	279.257	266.499	221.997
		ENSMUSG00000030064	1001.48	866.378	1293.12	1096.8	1314.56	911.665	1050.91	1020.24
		ENSMUSG00000030107	222.027	261.952	454.498	351.215	446.815	237.993	351.142	297.571
		ENSMUSG00000030218	4742.88	3873.22	6834.09	5526.12	7434.77	4235.88	4578.25	4191.49
		ENSMUSG00000030220	919.996	968.304	1568.75	1282.44	1675.08	886.714	1091.14	969.23
		ENSMUSG00000030222	184.235	203.854	307.886	221.767	320.249	192.889	190.237	199.325
		ENSMUSG00000030247	2320.66	2267.87	4044.55	3392.74	3447	2562.26	2652.42	2735.76
		ENSMUSG00000030291	1248.31	1304.66	1733.94	1631.65	1819.86	1265.78	1349.26	1297.03
		ENSMUSG00000030298	3143.81	3328.93	3826.58	3601.46	3914.91	2982.59	3261.68	3183.53
		ENSMUSG00000030342	1569.54	1671.6	2801.27	2221.69	2794.99	1403.96	1713.81	1707.02
		ENSMUSG00000030353	199.588	201.815	257.06	267.927	287.649	190.01	183.532	239.946
		ENSMUSG00000030417	3159.16	3108.77	4328	3709.84	4163.24	3241.69	3099.1	3055.06
		ENSMUSG00000030431	79.1267	69.3102	144.658	106.368	138.072	72.9332	83.8047	84.0755
		ENSMUSG00000030432	9172.8	10024.5	13353.5	11650.3	12796.6	9622.39	9909.91	9731.97
		ENSMUSG00000030469	446.417	465.805	596.224	497.722	601.187	427.043	475.173	429.824
		ENSMUSG00000030579	686.159	632.965	1144.55	885.063	1274.29	621.852	715.692	610.256
		ENSMUSG00000030654	1609.7	1644.08	1963.63	1881.51	2133.4	1527.76	1676.09	1579.49
		ENSMUSG00000030682	1835.27	1927.44	2442.56	2440.44	2462.28	1896.26	2193.17	2043.32
		ENSMUSG00000030707	428.702	488.229	777.046	631.184	865.824	469.268	591.661	479.892
		ENSMUSG00000030717	273.991	294.568	402.695	329.139	462.156	250.468	273.203	262.618
		ENSMUSG00000030737	1267.21	1416.78	1683.11	1936.7	1742.2	1325.27	1495.08	1350.88
		ENSMUSG00000030744	19233.7	19171.4	28333.3	23300.6	26263.3	19365.7	19088.2	18888.6
		ENSMUSG00000030748	872.756	905.11	1120.12	1172.06	1330.86	781.153	945.317	891.767
		ENSMUSG00000030750	1407.75	1378.05	1801.38	1516.25	1793.97	1367.5	1393.67	1586.1
		ENSMUSG00000030782	800.715	788.913	1066.36	918.177	1151.56	774.436	927.718	861.538
		ENSMUSG00000030785	63116	64889.7	83695.2	86639.8	86492.3	64617.9	72331	65125.4
		ENSMUSG00000030844	275.172	295.588	454.498	397.375	528.316	286.935	278.232	319.298
		ENSMUSG00000030878	661.358	643.158	1118.16	788.729	1156.35	581.547	652.839	637.651
		ENSMUSG00000030890	4377.95	4400.18	5024.9	4720.33	5420.27	4248.36	4442.49	4427.66
		ENSMUSG00000030921	725.132	766.489	1062.45	978.386	1168.81	687.108	745.024	705.667
		ENSMUSG00000030966	416.892	458.671	705.694	664.299	722.958	518.21	524.617	473.279
		ENSMUSG00000031015	1052.27	973.401	1305.83	1216.21	1293.46	1096.88	1027.45	1095.82
		ENSMUSG00000031059	20006.1	19881.8	25105.9	22318.2	25821.3	20077.7	19059.7	18358.7
		ENSMUSG00000031068	7291.47	7563.99	9492.67	8731.21	9838.56	8363.33	7640.48	7822.8
		ENSMUSG00000031149	216.122	226.277	321.57	318.101	354.767	207.284	228.787	240.89
		ENSMUSG00000031157	748.752	815.414	1007.72	922.191	898.424	764.839	851.456	815.249
		ENSMUSG00000031176	3287.89	3291.22	3947.78	3834.27	3861.21	3230.17	3192.96	2976.65
		ENSMUSG00000031207	10368	10420	11829.7	11274	12681.5	9558.09	10514.1	10118.3
		ENSMUSG00000031231	39017.8	37791.4	54808.6	45612.8	54246.8	36630.7	36177.7	34636.3
		ENSMUSG00000031239	709.779	638.062	880.652	766.653	1129.5	661.197	625.183	689.608
		ENSMUSG00000031246	2077.37	1950.88	2670.3	2601	2497.75	1692.82	1797.61	1689.07
		ENSMUSG00000031304	486.57	442.362	780.955	674.333	851.442	436.64	631.887	503.508
		ENSMUSG00000031320	22872.4	23032.4	35925.9	28132.3	33103.6	22876.1	22680.1	22212
		ENSMUSG00000031400	405.082	408.726	635.32	531.84	638.581	407.85	423.214	394.871
		ENSMUSG00000031402	654.272	652.331	1077.11	822.847	938.695	680.39	798.659	783.13
		ENSMUSG00000031519	1247.13	1372.95	1637.17	1469.08	1827.53	1238.91	1419.65	1321.59
		ENSMUSG00000031538	1241.23	1259.82	1846.34	1589.5	1880.27	1087.28	1390.32	1246.96
		ENSMUSG00000031546	595.222	703.295	838.623	843.92	799.665	690.946	734.129	657.489
		ENSMUSG00000031556	1757.32	1942.72	2152.27	2079.19	2279.14	1850.2	1929.18	1839.27
		ENSMUSG00000031591	2474.19	2375.91	3122.84	2729.44	3004.02	2488.37	2407.71	2300.27
		ENSMUSG00000031722	22.4389	9.17341	89.9223	84.2917	46.9827	12.4754	41.0643	34.9527
		ENSMUSG00000031799	7300.92	6682.32	9937.39	8491.38	11316.1	5759.81	6866.96	5934.41
		ENSMUSG00000031827	568.059	670.678	908.997	764.646	1059.51	532.604	704.798	659.379
		ENSMUSG00000031838	309.421	270.106	428.108	421.458	448.733	236.073	279.908	256.005
		ENSMUSG00000031843	316.507	263.99	433.973	337.167	406.544	313.805	323.486	273.954
		ENSMUSG00000031871	9635.75	9999.02	13552.9	13413.4	13597.2	9980.34	12305	12054.9
		ENSMUSG00000031875	944.797	932.63	1412.37	1222.23	1666.45	922.221	1076.05	992.847
		ENSMUSG00000031879	1274.29	1353.59	1576.57	1558.39	1721.1	1341.59	1459.04	1391.5
		ENSMUSG00000031897	2019.5	2103.77	2690.83	2678.27	2668.43	2188.96	2431.17	2257.76
		ENSMUSG00000031954	1788.03	1844.87	2208.96	2007.95	2238.87	1825.25	1826.94	1695.68
		ENSMUSG00000032011	257.457	280.299	529.76	504.747	642.417	311.886	378.797	370.31
		ENSMUSG00000032014	569.24	552.443	961.777	850.945	858.153	502.855	671.276	616.869
		ENSMUSG00000032035	4018.93	4308.45	6866.35	5880.35	6292.81	4759.85	5529.43	5010.52
		ENSMUSG00000032067	2263.97	2376.93	2838.42	2504.67	2732.67	2235.02	2287.87	2274.76
		ENSMUSG00000032085	1018.02	755.277	1480.79	1555.38	1273.33	811.862	905.091	691.497
		ENSMUSG00000032125	2220.27	2335.14	2901.95	3007.41	2882.25	2188.96	2331.45	2271.93
		ENSMUSG00000032135	2618.27	2381.01	3635.99	2852.87	3723.14	2359.77	2825.89	2629.01
		ENSMUSG00000032231	4036.65	3968.01	5529.24	4674.17	6158.57	3268.56	3814.79	3824.96
		ENSMUSG00000032271	121.643	134.543	251.196	204.708	239.708	106.521	129.059	145.479
		ENSMUSG00000032288	1222.33	1178.27	1605.89	1498.18	1608.92	1256.18	1306.52	1253.58
		ENSMUSG00000032299	790.086	784.836	903.133	953.299	1011.57	721.655	827.99	778.407
		ENSMUSG00000032330	18241.7	17737.3	25730.5	22433.6	25707.2	17782.3	17656	16651.7
		ENSMUSG00000032344	70.8598	80.5222	128.042	123.427	102.595	95.0051	70.396	68.0161
		ENSMUSG00000032349	1343.97	1391.3	1601.01	1826.32	1664.53	1331.03	1484.18	1424.56
		ENSMUSG00000032353	1127.85	1324.03	1577.55	1361.71	1583.03	1098.8	1283.89	1175.17
		ENSMUSG00000032359	2027.77	2202.64	2603.84	2431.41	2893.75	2059.4	2258.54	2202.97
		ENSMUSG00000032381	2445.84	2463.57	2911.72	2734.46	2981.96	2415.43	2324.74	2153.84
		ENSMUSG00000032382	1730.16	1672.62	2249.03	2127.36	2329.96	1662.11	1773.31	1683.4
		ENSMUSG00000032383	3061.14	3118.96	4414.99	3870.39	4660.88	2947.08	3330.4	3118.35
		ENSMUSG00000032397	333.041	335.339	562.014	450.559	499.551	350.271	388.016	364.642
		ENSMUSG00000032398	1022.74	1059.02	1198.31	1251.33	1363.46	1008.59	1081.92	927.664
		ENSMUSG00000032399	27402.7	27322.5	33993.6	30935	33522.6	27299.1	26987.6	27550.3
		ENSMUSG00000032412	2757.63	2886.57	3238.18	3035.5	3597.53	2750.35	2879.53	2803.78
		ENSMUSG00000032419	255.095	283.356	438.86	376.302	376.82	294.612	300.021	320.243
		ENSMUSG00000032436	478.303	471.921	767.272	774.681	776.653	553.717	628.535	536.572
		ENSMUSG00000032475	2216.73	1898.9	3041.72	2381.24	2858.27	2083.4	2066.62	2057.49
		ENSMUSG00000032508	709.779	768.528	953.958	884.059	1069.1	784.992	870.731	751.956
		ENSMUSG00000032518	30354	31441.4	43578.1	37108.4	42183.8	30566.7	31011.9	30562.9
		ENSMUSG00000032554	1955.73	2358.59	2946.91	3157.93	3637.8	1997.99	2468.05	2266.26
		ENSMUSG00000032596	1166.82	1255.74	1477.85	1574.45	1602.21	1200.52	1301.49	1359.38
		ENSMUSG00000032649	642.462	501.48	865.013	751.601	820.759	638.166	680.494	658.434
		ENSMUSG00000032735	3649.28	3747.85	5618.19	5724.81	5345.48	4631.26	4124.87	4915.11
		ENSMUSG00000032766	2194.29	1869.34	3594.94	2406.33	3529.46	1652.51	1990.36	1929.01
		ENSMUSG00000032878	918.815	875.551	1513.04	1537.32	1616.59	1120.87	960.402	1171.39
		ENSMUSG00000032892	2937.14	3271.85	3794.33	3668.69	4051.06	3312.7	3123.4	2982.32
		ENSMUSG00000033088	1348.7	1423.92	1908.89	1800.23	1978.07	1454.83	1683.64	1604.05
		ENSMUSG00000033170	1914.39	2109.88	2534.44	2683.29	2402.83	2156.33	2303.79	2120.78
		ENSMUSG00000033174	8223.28	10100.9	12031	13507.7	11730.3	8532.23	11096.6	8817.54
		ENSMUSG00000033191	6377.38	6730.23	8714.64	8780.38	9553.79	6635	7560.86	6795
		ENSMUSG00000033220	194.864	164.102	290.293	243.844	322.167	179.454	243.872	191.768
		ENSMUSG00000033287	720.408	657.428	1055.61	972.365	1134.3	654.48	906.767	760.458
		ENSMUSG00000033307	2293.49	2377.95	3072.02	2852.87	2736.5	2381.85	2587.89	2259.65
		ENSMUSG00000033355	342.489	402.611	689.078	591.045	779.529	371.384	493.61	432.658
		ENSMUSG00000033429	3740.22	3918.07	4530.32	4218.6	4688.68	3892.33	3501.36	3406.47
		ENSMUSG00000033446	573.964	549.385	857.194	908.142	779.529	586.345	589.985	541.295
		ENSMUSG00000033467	217.303	199.777	386.079	295.021	359.562	214.001	265.661	215.384
		ENSMUSG00000033685	1958.09	2247.49	3413.14	3059.59	3312.76	1857.88	2595.43	1893.12
		ENSMUSG00000033910	1047.54	1012.13	1558.98	1473.1	1251.27	1042.18	1161.53	1227.12
		ENSMUSG00000033933	640.1	627.869	734.04	793.747	771.859	646.803	606.746	693.387
		ENSMUSG00000033938	14715.2	15995.4	17367.7	17688.2	17375.9	15293.9	15829	15031.6
		ENSMUSG00000033955	2558.04	2710.23	3630.12	3634.58	3654.1	3053.6	3038.76	3107.96
		ENSMUSG00000033960	6469.5	6044.26	8655.02	7383.55	8923.84	7200.24	6918.92	7126.58
		ENSMUSG00000033965	570.421	585.06	796.594	692.396	700.905	543.161	644.458	624.426
		ENSMUSG00000034037	2643.07	2645	3002.62	3104.74	3267.7	2780.1	2652.42	2821.72
		ENSMUSG00000034205	1496.32	1757.22	2102.42	1886.53	2487.21	1160.21	1675.26	1448.18
		ENSMUSG00000034321	419.254	460.709	595.246	585.024	604.063	473.106	499.476	516.734
		ENSMUSG00000034387	268.086	206.911	394.876	326.129	424.762	223.598	222.082	270.175
		ENSMUSG00000034401	473.579	478.037	666.598	599.073	670.223	440.478	473.497	443.05
		ENSMUSG00000034422	2103.35	2229.14	2881.42	2698.34	2979.09	2199.51	2600.46	2459.92
		ENSMUSG00000034457	257.457	253.798	423.221	316.094	389.285	241.831	286.612	275.843
		ENSMUSG00000034459	361.385	413.823	687.124	539.868	788.159	420.326	514.561	435.492
		ENSMUSG00000034484	2229.72	2108.87	2953.75	2484.6	2820.88	2284.92	2242.61	2114.17
		ENSMUSG00000034595	1022.74	915.303	1427.03	1201.16	1449.75	1047.94	1133.04	1004.18
		ENSMUSG00000034664	64.9548	80.5222	283.451	99.3438	123.689	61.4175	80.4525	104.858
		ENSMUSG00000034714	168.882	214.046	266.835	283.983	372.985	172.737	243.872	201.214
		ENSMUSG00000034786	148.806	169.198	246.309	229.795	298.196	172.737	180.18	153.981
		ENSMUSG00000034810	1760.87	1546.23	2102.42	1942.72	1821.78	1668.83	1553.74	1689.07
		ENSMUSG00000034868	2258.06	2242.39	3332.99	2802.7	3371.25	2092.99	2432.01	2246.42
		ENSMUSG00000034872	80.3077	66.2524	148.567	157.545	110.266	91.1665	106.432	89.7435
		ENSMUSG00000034881	87.3937	94.7919	210.144	215.747	203.272	120.916	171.8	129.42
		ENSMUSG00000034892	14728.2	13986.4	22873.5	18082.6	21071.3	14405.3	14791.5	13350.1
		ENSMUSG00000034911	3922.09	3907.87	5801.94	5534.15	5772.16	4434.53	4559.81	4585.42
		ENSMUSG00000034936	543.258	538.173	884.562	802.778	868.701	635.287	689.713	580.971
		ENSMUSG00000034993	1113.68	1115.08	1584.39	1405.86	1564.81	1139.1	1350.93	1192.17
		ENSMUSG00000035000	190.14	179.391	335.254	286.993	322.167	170.817	175.99	221.052
		ENSMUSG00000035048	2682.04	2689.85	3112.09	3015.43	3232.22	2711.96	2747.12	2547.77
		ENSMUSG00000035104	132.272	175.314	301.044	277.962	279.02	178.494	151.687	164.372
		ENSMUSG00000035171	727.494	646.216	933.432	742.57	930.066	687.108	621.831	601.754
		ENSMUSG00000035212	1785.67	1680.77	2437.68	1978.85	2227.36	1692.82	1828.62	1803.37
		ENSMUSG00000035356	289.344	237.489	367.508	279.969	475.58	270.621	292.478	270.175
		ENSMUSG00000035373	70.8598	99.8883	244.354	138.479	194.643	61.4175	111.46	66.1268
		ENSMUSG00000035385	118.1	143.717	306.909	166.576	324.085	91.1665	153.363	107.692
		ENSMUSG00000035674	14474.3	15314.5	18431.1	18329.4	19556.3	14236.4	14964.2	13607
		ENSMUSG00000035692	231.475	307.819	782.91	454.573	632.828	237.033	391.368	354.251
		ENSMUSG00000035778	1467.98	1475.9	2227.53	2062.14	2026.97	1569.98	1593.13	1476.52
		ENSMUSG00000035863	2353.73	2689.85	3185.4	3280.35	3442.2	2335.78	2693.48	2627.12
		ENSMUSG00000035885	5968.75	5956.6	7221.15	6561.71	7575.72	5707.02	6073.33	5664.23
		ENSMUSG00000035929	2106.9	1938.65	3219.61	3175.99	3263.86	2192.8	2568.61	2770.71
		ENSMUSG00000036144	674.349	724.699	1533.57	1261.36	1559.06	968.285	967.106	944.668
		ENSMUSG00000036256	4975.54	5156.48	7484.08	7163.79	9367.78	4436.45	5997.06	5266.53
		ENSMUSG00000036315	703.874	712.468	914.861	861.983	985.678	704.381	723.235	701.889
		ENSMUSG00000036381	256.276	250.74	396.831	348.205	377.779	265.822	233.815	274.899
		ENSMUSG00000036398	2415.14	2762.22	3431.71	3269.31	3520.83	2771.46	2566.94	2598.78
		ENSMUSG00000036438	5797.51	5245.15	7680.54	6595.82	7547.92	5374.03	5550.39	5371.38
		ENSMUSG00000036446	3310.33	3122.02	4591.9	3557.31	4908.25	2947.08	3187.09	3181.64
		ENSMUSG00000036459	294.068	288.453	519.008	436.51	487.086	310.926	355.332	324.966
		ENSMUSG00000036513	689.702	635.004	857.194	793.747	881.165	618.013	703.121	659.379
		ENSMUSG00000036553	803.077	738.969	1067.34	976.379	992.39	726.453	838.047	852.091
		ENSMUSG00000036570	10926.6	11772.5	12461.1	13204.7	13048.7	11069.5	11932.1	11007.3
		ENSMUSG00000036594	3307.97	3622.48	4969.18	5321.41	7679.28	4043.96	4102.24	3938.32
		ENSMUSG00000036655	849.136	940.784	1546.27	1427.94	1484.27	990.356	1113.76	905.937
		ENSMUSG00000036667	735.761	749.162	905.087	965.34	1015.4	772.516	806.201	871.929
		ENSMUSG00000036751	37848.6	40232.5	50999.6	48273	53422.2	38092.3	40026	37122.6
		ENSMUSG00000036781	2229.72	2301.51	3243.07	2734.46	3562.06	2082.44	2112.72	1991.36
		ENSMUSG00000036835	1586.08	1652.23	1909.87	1822.31	1866.84	1619.89	1692.86	1599.32
		ENSMUSG00000036887	2138.78	2377.95	3628.17	3180	4144.07	1901.06	2290.38	1969.63
		ENSMUSG00000036896	2271.06	2564.48	4093.42	3590.42	4813.33	2126.58	2623.09	2307.83
		ENSMUSG00000036905	2484.82	2667.42	3914.55	3672.71	4820.04	2137.14	2773.1	2213.36
		ENSMUSG00000036908	1113.68	1256.76	1574.62	1645.69	1972.31	1072.89	1265.45	1185.56
		ENSMUSG00000036923	66.1358	53.0019	117.29	102.354	89.1713	64.2964	69.5579	67.0715
		ENSMUSG00000036968	314.145	312.915	448.634	389.347	490.921	291.733	319.296	273.954
		ENSMUSG00000037031	532.629	547.347	860.126	974.372	847.606	587.304	736.643	606.477
		ENSMUSG00000037060	892.833	927.534	1185.61	1131.92	1353.87	767.718	890.006	959.783
		ENSMUSG00000037070	855.041	870.455	1024.33	991.431	1141.01	918.383	913.471	878.542
		ENSMUSG00000037071	752.295	648.254	1305.83	861.983	882.124	647.762	845.589	727.395
		ENSMUSG00000037072	4873.97	4848.66	6723.65	6073.01	6827.83	4657.17	4950.34	4604.31
		ENSMUSG00000037119	1339.25	1320.97	1673.34	1579.47	1680.83	1378.05	1354.28	1367.88
		ENSMUSG00000037166	114.557	103.965	228.715	171.594	199.437	111.319	139.116	141.7
		ENSMUSG00000037169	167.701	180.41	441.792	235.816	398.874	196.728	278.232	190.823
		ENSMUSG00000037235	5196.38	4964.85	5983.74	6306.82	6498.95	5650.41	5453.17	5517.81
		ENSMUSG00000037347	165.339	168.179	254.128	261.906	282.855	179.454	203.645	227.665
		ENSMUSG00000037361	1159.74	1079.4	1606.87	1345.66	1600.29	1116.07	1127.17	1030.63
		ENSMUSG00000037410	1038.1	1031.5	1509.13	1383.79	1404.69	1207.24	1213.49	1204.45
		ENSMUSG00000037419	473.579	480.075	573.743	611.115	691.317	463.51	539.702	491.228
		ENSMUSG00000037447	552.706	666.601	775.091	714.472	864.865	582.506	626.021	623.481
		ENSMUSG00000037499	2861.55	3013.98	3837.34	3401.77	4015.58	3070.87	2892.1	2953.03
		ENSMUSG00000037563	7485.15	7350.96	12463	9871.16	11352.6	7360.5	7626.23	7293.79
		ENSMUSG00000037664	734.58	754.258	1256.96	1376.76	1351.95	779.234	1099.52	923.886
		ENSMUSG00000037731	187.778	190.603	305.931	283.983	287.649	190.97	262.309	219.163
		ENSMUSG00000037742	46259.6	46962.8	81714.9	65843.8	78613.6	50295.1	52839.7	52516
		ENSMUSG00000037805	9266.1	10014.3	13375	12051.7	13276.9	9656.93	9821.91	9942.64
		ENSMUSG00000037824	925.901	947.919	1317.56	1186.1	1409.48	882.876	1002.3	1008.91
		ENSMUSG00000037894	2434.03	2197.54	2945.93	2723.42	2877.45	2209.11	2159.65	2041.43
		ENSMUSG00000037960	3037.52	3350.33	3705.38	3602.47	3933.12	3401.95	3333.75	3246.83
		ENSMUSG00000038070	368.471	322.089	501.414	429.486	499.551	364.666	331.029	343.859
		ENSMUSG00000038253	9.44797	7.13488	28.3451	36.125	38.3532	18.2333	15.9229	17.9487
		ENSMUSG00000038296	790.086	852.108	1087.86	1075.72	1192.79	690.946	983.867	797.3
		ENSMUSG00000038366	2227.36	2425.86	3112.09	3182.01	3377.96	2212.95	2900.48	2663.97
		ENSMUSG00000038374	1568.36	1563.56	1800.4	1793.21	1832.33	1593.02	1578.04	1592.71
		ENSMUSG00000038387	1590.8	1570.69	2100.47	1925.66	2265.72	1576.7	1586.42	1733.47
		ENSMUSG00000038457	299.973	282.337	374.35	390.351	488.045	305.168	315.944	331.579
		ENSMUSG00000038530	1244.77	1520.75	2222.64	1871.48	2115.18	1436.59	1413.79	1427.39
		ENSMUSG00000038543	376.738	341.455	679.304	420.455	661.593	380.02	415.671	403.373
		ENSMUSG00000038587	2597.01	2572.63	3414.11	3096.72	3029.91	2570.9	2731.2	2766.93
		ENSMUSG00000038642	949.521	1240.45	1500.33	1451.02	2068.2	1023.94	1159.02	913.494
		ENSMUSG00000038683	1621.51	1613.5	1935.28	1881.51	1987.66	1615.09	1649.28	1590.82
		ENSMUSG00000038690	33177.7	34279	45986.5	41795.6	46536.8	32646.3	32548.9	31866.5
		ENSMUSG00000038702	412.168	346.551	551.263	446.545	554.204	380.98	439.975	375.033
		ENSMUSG00000038717	38715.4	37535.6	48547.3	43414.2	47023	36254.5	36479.4	34950.8
		ENSMUSG00000038722	1782.12	1827.55	2304.75	2110.3	2552.41	1753.28	1740.62	1717.41
		ENSMUSG00000038776	1414.83	1377.03	2378.05	2082.21	2038.47	1603.57	1661.85	1553.98
		ENSMUSG00000038803	2947.77	3044.55	3943.87	3674.72	4076.95	2840.56	2984.29	2772.6
		ENSMUSG00000038811	599.946	671.698	1053.65	924.198	1057.59	625.69	657.029	546.963
		ENSMUSG00000038855	5531.79	5611.07	8122.33	7444.76	8098.28	6301.05	6563.58	6653.3
		ENSMUSG00000038893	196.045	192.642	425.176	299.035	274.226	222.638	245.548	265.452
		ENSMUSG00000038900	10708.1	10297.7	16874.1	12997	15193.6	10642.5	10422	10024.8
		ENSMUSG00000038976	2253.34	2535.94	3129.69	3194.05	3299.34	2658.22	2842.66	2717.81
		ENSMUSG00000039001	5825.85	5004.61	8402.85	6650.01	7476.96	5088.05	5413.78	5147.5
		ENSMUSG00000039004	858.584	1220.06	1539.43	1400.85	1569.61	975.002	1050.91	1127.93
		ENSMUSG00000039016	4342.52	4637.67	5853.75	5546.19	6192.13	4269.47	3984.08	4111.2
		ENSMUSG00000039031	1061.72	1248.6	1661.61	1486.14	1544.68	1168.85	1297.3	1170.44
		ENSMUSG00000039156	666.082	681.89	842.533	769.663	917.601	688.067	724.073	734.952
		ENSMUSG00000039167	4731.07	4800.75	6123.51	6053.95	5996.53	4828.95	4589.15	4258.57
		ENSMUSG00000039221	1536.48	1344.41	2343.84	1671.78	1747.95	1285.93	1236.12	1208.23
		ENSMUSG00000039232	86.2127	88.6763	168.116	132.458	186.972	102.682	141.63	106.748
		ENSMUSG00000039294	707.417	766.489	981.326	821.844	982.801	737.969	724.911	664.102
		ENSMUSG00000039349	1129.03	1172.16	1903.03	1794.21	1763.29	1361.74	1474.96	1414.17
		ENSMUSG00000039405	830.24	791.971	1201.24	1181.09	1212.92	711.099	871.569	778.407
		ENSMUSG00000039519	22.4389	22.4239	52.7805	34.1181	65.2005	18.2333	24.3034	31.1741
		ENSMUSG00000039530	1121.95	1065.13	1583.41	1198.15	1352.91	1070.01	1084.43	1103.37
		ENSMUSG00000039771	1210.52	1323.01	1556.05	1381.78	1548.51	1209.16	1332.49	1283.8
		ENSMUSG00000039810	363.747	418.919	522.918	512.774	552.286	416.487	457.574	453.441
		ENSMUSG00000039886	668.444	715.526	860.126	835.892	838.977	750.445	674.628	736.841
		ENSMUSG00000039887	647.186	633.985	781.933	746.583	833.224	602.659	656.191	601.754
		ENSMUSG00000039942	183.054	189.584	333.299	341.181	278.061	211.122	250.576	212.55
		ENSMUSG00000039958	1013.29	1318.93	1267.71	1800.23	1723.98	1220.67	1216.01	945.613
		ENSMUSG00000039985	224.389	198.757	304.954	282.979	281.896	221.679	208.674	202.159
		ENSMUSG00000039994	899.919	892.879	1294.1	1314.55	1658.78	974.042	1055.94	1112.82
		ENSMUSG00000040093	299.973	328.204	508.256	426.476	475.58	318.603	393.044	385.425
		ENSMUSG00000040158	2370.26	2208.75	2862.85	2622.07	3054.83	2214.87	2342.34	2149.12
		ENSMUSG00000040181	2673.78	2657.23	3586.14	3371.67	3426.86	2861.67	2743.77	3030.5
		ENSMUSG00000040212	534.991	575.886	949.071	755.615	927.189	423.205	574.062	524.291
		ENSMUSG00000040220	892.833	935.688	1198.31	1128.91	1207.17	1007.63	966.268	904.048
		ENSMUSG00000040253	1125.49	1455.51	1622.51	1764.1	1926.29	1070.01	1196.73	1471.79
		ENSMUSG00000040280	781.82	764.451	1327.33	1174.06	1248.4	797.467	907.605	885.154
		ENSMUSG00000040289	505.466	614.619	936.365	807.795	889.795	501.896	450.869	484.615
		ENSMUSG00000040331	1669.93	1665.48	2087.76	1846.39	2060.53	1819.49	1691.18	1757.08
		ENSMUSG00000040447	670.806	710.43	1097.64	842.917	981.843	684.229	756.756	813.36
		ENSMUSG00000040462	1651.03	1775.56	2100.47	2178.54	2030.8	1747.52	1881.42	1893.12
		ENSMUSG00000040466	552.706	537.154	830.804	661.288	732.547	524.927	582.443	590.418
		ENSMUSG00000040483	648.367	696.16	964.71	877.035	950.201	623.771	724.073	730.229
		ENSMUSG00000040528	51.9638	35.6744	90.8997	77.2674	76.7065	55.6596	52.797	38.7314
		ENSMUSG00000040592	24.8009	30.578	56.6901	52.1806	57.5298	31.6684	39.3882	29.2847
		ENSMUSG00000040631	1326.26	1246.56	2036.94	2004.94	2301.19	1614.13	1733.08	1752.36
		ENSMUSG00000040710	859.765	817.453	1284.32	1069.7	1078.68	914.544	861.512	778.407
		ENSMUSG00000040732	1430.19	1384.17	2140.54	1761.09	2195.72	1461.54	1598.99	1506.75
		ENSMUSG00000040747	322.412	335.339	563.969	393.361	493.798	318.603	295.831	295.681
		ENSMUSG00000040822	585.774	663.543	806.368	783.712	871.577	554.676	606.746	572.469
		ENSMUSG00000040824	2378.53	2321.89	2764.13	2647.16	2941.69	2303.15	2391.79	2188.8
		ENSMUSG00000040950	721.589	827.646	1189.52	978.386	1257.99	740.848	808.715	749.122
		ENSMUSG00000040952	9109.02	8849.28	14487.3	11140.5	12862.7	8970.79	9005.65	8550.19
		ENSMUSG00000041012	783.001	831.723	1175.83	1013.51	1048.96	808.023	843.075	850.202
		ENSMUSG00000041134	3981.14	3990.43	5181.28	4939.09	4327.2	3877.94	4081.29	3747.5
		ENSMUSG00000041135	284.62	328.204	385.102	378.309	401.75	332.038	322.648	320.243
		ENSMUSG00000041187	1234.14	1144.64	1428.98	1412.89	1627.14	1276.33	1226.9	1234.68
		ENSMUSG00000041238	372.014	332.281	455.476	405.403	535.028	370.424	351.98	339.136
		ENSMUSG00000041261	1442	1403.53	2342.87	1881.51	1984.78	1124.71	1398.7	1348.99
		ENSMUSG00000041355	1929.75	2162.89	2575.49	2466.53	2988.68	2067.08	2363.29	2126.45
		ENSMUSG00000041378	945.978	1287.34	1755.44	2168.5	2289.69	1094	1608.21	1130.77
		ENSMUSG00000041390	829.059	839.877	1200.27	1164.03	1111.28	872.32	986.381	899.324
		ENSMUSG00000041445	2326.56	2468.67	3168.78	3234.19	3371.25	2102.59	2517.49	2285.15
		ENSMUSG00000041453	16935.5	16219.6	25151.8	19329.9	22758.8	16399.4	15769.5	14935.2
		ENSMUSG00000041571	5969.94	6062.61	8523.07	7642.45	8229.64	6713.7	7115.86	6834.68
		ENSMUSG00000041629	986.132	1010.09	1247.18	1134.93	1245.52	984.599	1039.18	1030.63
		ENSMUSG00000041633	1160.92	1249.62	2411.29	1827.32	2091.21	1285.93	1509.32	1157.22
		ENSMUSG00000041696	478.303	448.478	692.011	648.243	633.787	536.443	542.216	500.674
		ENSMUSG00000041697	3173.34	3391.1	4317.25	4067.07	4528.56	3191.79	3767.86	3548.17
		ENSMUSG00000041707	33.0679	36.6936	77.2159	85.2951	88.2124	44.1438	47.7687	43.4547
		ENSMUSG00000041736	1216.43	1296.51	1721.23	1547.35	1641.52	1193.8	1329.98	1229.96
		ENSMUSG00000041841	6592.32	6571.22	9726.27	7964.56	9273.81	6341.35	6494.86	6283.93
		ENSMUSG00000041859	294.068	269.087	465.25	395.368	442.98	277.338	361.198	318.353
		ENSMUSG00000041881	8551.59	9612.72	11412.3	11173.7	11911.6	8966.95	9507.64	8983.8
		ENSMUSG00000041959	1582.53	1663.45	2510	2069.16	3080.72	1249.46	1539.49	1450.07
		ENSMUSG00000041974	148.806	154.929	231.648	204.708	231.078	176.575	177.666	178.542
		ENSMUSG00000042043	1669.93	1588.02	2220.69	1906.6	2280.1	1488.41	1594.8	1402.83
		ENSMUSG00000042063	1462.07	1450.42	1887.39	1567.42	1684.67	1397.25	1421.33	1307.42
		ENSMUSG00000042079	7804.02	7895.25	9386.13	8565.64	9664.05	7942.04	7953.07	8137.37
		ENSMUSG00000042099	3144.99	3271.85	4518.59	4678.19	4841.14	3691.76	3417.56	3295.95
		ENSMUSG00000042106	191.321	222.2	415.402	306.059	443.939	276.379	276.556	265.452
		ENSMUSG00000042228	1095.96	1089.6	1555.07	1287.45	1577.28	1062.33	1147.29	1235.63
		ENSMUSG00000042289	1064.08	1153.81	1461.24	1434.97	1560.98	1246.58	1262.1	1213.9
		ENSMUSG00000042312	1195.17	1065.13	1927.46	1461.06	1626.18	1205.32	1239.47	1206.34
		ENSMUSG00000042396	1009.75	1039.65	1448.53	1281.43	1520.71	1029.7	1024.93	992.847
		ENSMUSG00000042462	705.055	774.644	956.89	903.125	1055.67	706.301	727.425	718.893
		ENSMUSG00000042485	248.009	259.913	486.753	338.17	406.544	271.58	237.167	260.728
		ENSMUSG00000042541	4996.8	4595.88	6315.09	5280.27	5930.37	4543.93	4445	4400.27
		ENSMUSG00000042572	1643.95	1687.91	2150.32	2003.93	2067.24	1822.37	1798.45	1724.96
		ENSMUSG00000042594	2229.72	2210.79	2873.6	2589.96	2818	2382.81	2448.77	2441.02
		ENSMUSG00000042622	452.322	469.882	720.356	475.646	698.029	423.205	402.263	355.195
		ENSMUSG00000042659	821.973	903.071	1366.43	1330.6	1376.88	862.723	1133.04	908.771
		ENSMUSG00000042670	3390.64	3806.97	5005.35	4313.93	5240.97	3608.28	3422.58	3351.68
		ENSMUSG00000042682	3491.02	3653.06	4900.76	4203.55	4586.09	3674.49	3674.84	3514.17
		ENSMUSG00000042712	686.159	643.158	1062.45	882.052	1125.67	663.117	665.409	673.549
		ENSMUSG00000042737	465.313	489.249	609.908	615.129	665.429	436.64	489.419	456.275
		ENSMUSG00000042745	1849.44	1917.24	3408.25	2487.61	3234.14	1737.92	1516.03	1535.09
		ENSMUSG00000042747	1313.27	1282.24	1684.09	1565.42	1724.94	1302.24	1353.45	1310.26
		ENSMUSG00000043008	454.684	413.823	771.181	618.139	650.087	552.757	528.808	483.67
		ENSMUSG00000043068	109.833	123.331	158.341	151.524	176.425	97.8841	103.918	90.6882
		ENSMUSG00000043099	498.38	652.331	1122.07	1201.16	1078.68	727.413	803.687	853.98
		ENSMUSG00000043131	3169.79	3179.1	3757.19	3494.09	3959.97	2970.11	3154.41	3041.83
		ENSMUSG00000043336	2168.31	2036.5	2758.27	2533.77	3038.53	2131.38	2054.89	2099.05
		ENSMUSG00000043366	94.4797	71.3488	160.296	142.493	133.277	94.0455	77.1003	68.0161
		ENSMUSG00000043421	222.027	237.489	335.254	256.889	317.373	216.88	221.244	222.942
		ENSMUSG00000043505	320.05	263.99	344.05	409.417	415.174	270.621	260.633	239.946
		ENSMUSG00000043716	22862.9	22265.9	32852.9	27159	31027.8	22677.4	21746.5	22339.5
		ENSMUSG00000043866	1681.74	1888.7	2242.19	2049.09	2352.01	1697.62	1865.49	2007.42
		ENSMUSG00000043943	1048.72	973.401	1280.42	1156	1224.43	921.262	934.422	980.566
		ENSMUSG00000044147	1436.09	1342.38	1917.69	1623.62	2010.67	1440.43	1534.46	1419.84
		ENSMUSG00000044229	791.267	702.276	1160.19	1002.47	1038.41	780.194	803.687	967.341
		ENSMUSG00000044258	1255.4	1376.01	2570.6	1562.41	1894.65	927.02	988.896	816.194
		ENSMUSG00000044317	504.285	558.559	704.717	769.663	868.701	562.354	661.219	599.864
		ENSMUSG00000044408	1708.9	1581.9	2076.03	1935.7	1982.86	1592.06	1536.98	1499.19
		ENSMUSG00000044533	46260.8	52945.9	68646.9	58027.8	70802	49043.8	50733.7	49837.9
		ENSMUSG00000044562	1759.68	1810.22	2503.16	2190.58	2598.43	1821.41	2045.67	2057.49
		ENSMUSG00000044629	164.158	178.372	308.863	229.795	294.361	210.163	165.933	175.708
		ENSMUSG00000044811	113.376	97.8497	150.522	149.517	203.272	105.561	123.193	88.7988
		ENSMUSG00000044894	24984	27160.4	30787.6	31202	33900.4	26634.1	27415	25780
		ENSMUSG00000044921	440.512	532.058	964.71	722.5	791.035	552.757	703.96	646.153
		ENSMUSG00000044991	1864.79	1856.09	2456.25	2531.76	2644.46	2294.52	2245.13	2083.94
		ENSMUSG00000045128	16343.8	17627.2	26409.8	22602.2	25512.6	17336	17968.6	17434.8
		ENSMUSG00000045160	6152.99	6367.37	7216.26	7421.68	7593.94	6133.11	6296.25	5882.45
		ENSMUSG00000045377	781.82	988.69	1728.07	1660.75	1652.07	848.329	1068.51	975.843
		ENSMUSG00000045629	376.738	381.206	574.721	497.722	661.593	404.012	446.679	435.492
		ENSMUSG00000045664	812.525	771.586	1103.5	902.122	1187.99	761.96	870.731	891.767
		ENSMUSG00000045680	360.204	342.474	541.489	508.76	544.616	379.061	398.91	358.029
		ENSMUSG00000045752	512.552	654.37	799.526	780.701	745.97	590.183	620.993	598.92
		ENSMUSG00000045757	217.303	226.277	332.321	303.049	372.985	262.943	235.491	226.72
		ENSMUSG00000045763	79.1267	68.2909	129.019	105.365	155.331	71.0139	87.1569	95.4115
		ENSMUSG00000045827	1183.36	1298.55	1672.36	1501.19	1693.3	1269.61	1390.32	1281.92
		ENSMUSG00000045868	4074.44	5303.25	5408.04	5993.74	7754.06	4253.16	3390.74	4361.53
		ENSMUSG00000045930	950.702	897.975	1588.3	1315.55	1276.2	905.907	1073.54	1010.8
		ENSMUSG00000045932	798.353	866.378	1418.23	1232.26	1438.25	842.571	1220.2	906.882
		ENSMUSG00000045954	9447.97	9318.15	12590.1	11599.1	12385.2	8799.97	9483.34	10105.1
		ENSMUSG00000045969	993.218	1015.19	1247.18	1165.03	1211	1074.81	1063.48	1030.63
		ENSMUSG00000045996	962.512	929.572	1232.52	1115.86	1266.62	812.822	871.569	741.565
		ENSMUSG00000046062	1801.02	1863.22	2258.81	2072.17	2235.03	1958.64	2001.26	1787.31
		ENSMUSG00000046223	140.539	129.447	234.58	191.663	295.32	118.037	133.249	127.53
		ENSMUSG00000046280	1170.37	1093.67	1711.46	1474.1	1608.92	1178.45	1304	1359.38
		ENSMUSG00000046330	7136.76	7424.35	11375.2	9194.82	10392.8	7222.31	7364.76	6914.03
		ENSMUSG00000046364	11651.7	11549.3	17039.3	13955.3	16143.8	11116.6	11161.1	11053.6
		ENSMUSG00000046410	366.109	359.802	435.928	436.51	462.156	334.917	346.113	359.919
		ENSMUSG00000046432	157.072	200.796	312.773	280.972	279.979	167.938	186.884	197.436
		ENSMUSG00000046447	943.616	1054.94	1483.72	1215.2	1473.72	899.19	945.317	869.095
		ENSMUSG00000046470	1519.94	1748.04	2155.2	1910.61	2988.68	1331.99	1964.38	1620.11
		ENSMUSG00000046491	139.358	138.62	284.428	230.799	260.802	170.817	186.046	192.712
		ENSMUSG00000046516	6171.89	6226.71	7735.27	6907.9	7243.01	5794.35	5727.21	5450.74
		ENSMUSG00000046546	1453.81	1643.06	2312.57	2436.43	2445.98	1873.23	1956	1969.63
		ENSMUSG00000046562	1724.25	1820.41	2165.95	2140.41	2488.17	1735.04	1988.69	1832.66
		ENSMUSG00000046688	158.253	172.256	257.06	250.868	262.72	140.109	184.37	153.036
		ENSMUSG00000046718	1107.77	1406.59	1739.8	1679.81	2099.84	1070.97	1471.61	1292.31
		ENSMUSG00000046731	252.733	312.915	395.854	366.267	413.256	274.459	294.155	260.728
		ENSMUSG00000046768	2130.52	2101.73	2865.78	2502.66	3149.76	2011.42	2151.27	2061.27
		ENSMUSG00000046916	1242.41	1253.7	2155.2	1700.89	1979.99	1290.73	1455.69	1453.84
		ENSMUSG00000047180	540.896	580.983	792.684	701.427	886.918	506.694	608.422	567.746
		ENSMUSG00000047215	17156.3	16265.5	22694.6	18097.6	20682.9	15619.2	15503	15195.9
		ENSMUSG00000047238	315.326	297.626	399.763	344.191	421.886	300.37	328.514	306.073
		ENSMUSG00000047407	237.38	218.123	316.683	311.076	433.391	218.8	295.831	227.665
		ENSMUSG00000047459	3995.31	4480.7	5447.14	5285.29	5578.48	4380.79	4875.76	4375.7
		ENSMUSG00000047675	14141.2	13506.3	19882.6	16013.4	19122	13595.3	13648.4	13299
		ENSMUSG00000047721	624.747	618.696	804.413	754.611	802.541	612.255	619.317	596.086
		ENSMUSG00000047735	1295.55	1417.8	2204.07	1660.75	2122.85	1143.9	1157.34	1242.24
		ENSMUSG00000047867	2772.98	2674.56	4082.67	3263.29	4546.78	2619.84	2622.25	2346.56
		ENSMUSG00000047945	200.769	192.642	423.221	326.129	474.621	167.938	309.239	259.784
		ENSMUSG00000048058	418.073	384.264	519.008	476.649	541.739	380.98	423.214	412.82
		ENSMUSG00000048100	748.752	763.432	898.245	942.261	1029.78	786.911	775.194	756.679
		ENSMUSG00000048120	1100.69	1105.91	1534.54	1359.71	1592.62	892.472	993.924	973.953
		ENSMUSG00000048163	262.181	220.162	360.667	322.115	377.779	233.194	253.928	260.728
		ENSMUSG00000048200	700.331	842.935	1082.98	1040.6	966.501	832.015	832.181	786.909
		ENSMUSG00000048332	2703.3	2595.06	3516.74	3311.46	3618.63	2659.18	3033.73	2815.11
		ENSMUSG00000048416	7479.25	7635.34	10958.8	8614.81	10678.5	8021.7	7376.49	8788.25
		ENSMUSG00000048450	120.462	137.601	322.547	265.92	279.02	149.705	191.075	169.096
		ENSMUSG00000048458	1893.14	1528.9	2069.19	2073.17	2339.55	1699.54	1692.02	1531.31
		ENSMUSG00000048706	124.005	100.908	204.28	198.688	210.943	111.319	171.8	142.645
		ENSMUSG00000048758	10443.5	10745.1	15297.5	13829.9	15489	10738.5	11217.3	10738
		ENSMUSG00000048779	198.407	236.47	310.818	298.031	381.615	170.817	232.977	201.214
		ENSMUSG00000048826	55.5068	42.8093	124.132	78.2708	121.772	45.1034	72.072	69.9055
		ENSMUSG00000048970	588.136	647.235	870.878	703.434	838.977	702.462	539.702	589.473
		ENSMUSG00000049047	1652.21	1801.05	2135.65	1887.53	2183.26	1717.77	1544.52	1712.68
		ENSMUSG00000049107	114.557	100.908	231.648	204.708	162.042	142.028	125.707	147.368
		ENSMUSG00000049124	291.706	247.682	394.876	361.25	394.079	241.831	280.746	212.55
		ENSMUSG00000049517	11472.2	11003	16944.5	13518.8	15602.1	11177	11195.5	10789.1
		ENSMUSG00000049521	1999.43	2371.84	2866.76	2948.2	3198.66	2220.62	2558.56	2436.3
		ENSMUSG00000049744	72.0408	56.0597	132.929	81.2813	104.513	57.5789	70.396	50.0674
		ENSMUSG00000049751	3185.15	3069.02	4122.74	3701.81	4214.06	3054.56	3101.61	3003.1
		ENSMUSG00000049760	5149.14	5263.5	6295.54	5761.94	6631.27	5046.79	4852.29	4530.63
		ENSMUSG00000049775	16130	15166.7	27657.9	21507.4	27180.9	13809.3	15116.7	14440.2
		ENSMUSG00000049792	1075.89	1073.29	1232.52	1211.19	1317.43	1019.15	956.212	1073.14
		ENSMUSG00000049929	74.4028	76.4451	137.816	109.378	139.989	68.135	93.0232	71.7948
		ENSMUSG00000049969	522	507.595	680.282	575.993	646.252	516.29	512.885	518.623
		ENSMUSG00000050014	279.896	310.877	601.111	525.82	661.593	302.289	444.165	446.828
		ENSMUSG00000050088	877.48	853.127	1145.53	1030.57	980.884	841.611	886.654	794.466
		ENSMUSG00000050105	230.294	244.624	382.17	339.174	451.609	214.001	248.9	289.069
		ENSMUSG00000050212	334.222	343.493	577.653	492.705	589.681	394.415	424.89	396.761
		ENSMUSG00000050234	269.267	377.129	496.527	478.656	607.899	332.998	377.121	382.591
		ENSMUSG00000050295	112.195	95.8112	165.183	158.549	181.219	67.1753	121.517	112.416
		ENSMUSG00000050299	5489.27	5659.99	8403.82	7023.3	7321.63	5644.65	5448.14	5420.51
		ENSMUSG00000050370	17.7149	23.4432	50.8256	39.1354	56.571	22.0719	29.3316	21.7274
		ENSMUSG00000050410	103.928	94.7919	171.048	142.493	166.837	107.481	127.383	121.862
		ENSMUSG00000050552	1780.94	1754.16	2160.09	2230.72	2357.76	1793.58	1839.51	1782.59
		ENSMUSG00000050621	9046.43	8248.93	15391.4	11702.5	13458.1	8666.58	9139.74	8154.38
		ENSMUSG00000050628	1262.48	1280.2	1775.97	1826.32	1683.71	1431.79	1655.98	1303.64
		ENSMUSG00000050708	15743.9	17934	24437.4	20854.2	23772.3	15986.8	17064.3	15943.2
		ENSMUSG00000050721	884.566	1046.79	1723.18	1445	1907.11	1043.14	1175.78	1045.75
		ENSMUSG00000050732	1032.19	1044.75	1392.82	1328.6	1422.9	1207.24	1124.66	1158.16
		ENSMUSG00000050910	194.864	202.834	349.915	341.181	341.344	239.912	243.872	282.456
		ENSMUSG00000050912	3526.45	3213.75	4416.94	3879.42	4033.8	3340.53	3276.76	3372.47
		ENSMUSG00000050914	196.045	192.642	460.363	272.944	360.52	236.073	161.743	198.38
		ENSMUSG00000051041	145.263	133.524	244.354	190.66	240.667	134.351	175.99	164.372
		ENSMUSG00000051124	214.941	197.738	292.247	281.976	359.562	198.647	196.103	166.262
		ENSMUSG00000051147	95.6607	79.5029	158.341	129.448	127.524	85.4086	110.622	76.5181
		ENSMUSG00000051177	505.466	360.821	633.366	606.097	606.94	380.02	482.715	421.322
		ENSMUSG00000051185	2053.75	2044.65	2380.01	2254.8	2433.51	2110.27	2022.21	2000.81
		ENSMUSG00000051319	1437.27	1439.21	1718.3	1785.18	1902.32	1343.51	1466.58	1331.04
		ENSMUSG00000051439	321.231	356.744	505.324	467.618	724.876	289.814	381.311	291.903
		ENSMUSG00000051451	1093.6	1165.02	1423.12	1330.6	1412.36	1110.31	1071.02	1111.87
		ENSMUSG00000051579	792.448	777.701	1173.88	1017.52	1175.53	759.081	698.093	792.577
		ENSMUSG00000051671	778.277	818.472	995.01	940.254	1061.43	801.306	783.574	727.395
		ENSMUSG00000052033	491.294	592.195	780.955	584.021	790.077	491.34	486.905	460.998
		ENSMUSG00000052146	10536.8	10271.2	14812.7	12029.6	13400.6	9995.69	9913.26	9648.84
		ENSMUSG00000052384	473.579	435.227	715.469	551.91	755.559	484.622	532.998	446.828
		ENSMUSG00000052544	194.864	210.988	367.508	340.177	298.196	201.526	229.625	231.444
		ENSMUSG00000052560	421.616	399.553	525.85	501.736	526.398	404.971	441.651	346.693
		ENSMUSG00000052681	3264.27	3112.84	4473.63	3789.11	4604.31	3173.55	3506.39	3056
		ENSMUSG00000052688	325.955	330.243	473.069	430.49	520.645	278.298	366.227	298.515
		ENSMUSG00000052776	212.579	285.395	494.573	369.278	539.822	264.863	392.206	341.025
		ENSMUSG00000052921	3252.46	3221.91	4374.91	4066.07	4377.06	3496	3675.67	3661.53
		ENSMUSG00000053119	4424.01	4222.83	4951.59	4601.92	5115.36	4263.71	4339.41	4358.7
		ENSMUSG00000053158	733.399	694.121	876.742	818.833	981.843	667.915	716.53	673.549
		ENSMUSG00000053175	164.158	182.449	349.915	275.955	360.52	163.14	288.288	223.886
		ENSMUSG00000053279	977.865	1001.94	1301.92	1455.03	1248.4	1167.89	1048.4	1017.41
		ENSMUSG00000053317	510.19	521.865	664.643	551.91	740.217	437.599	499.476	498.785
		ENSMUSG00000053559	448.779	450.516	785.843	701.427	743.094	478.864	583.281	505.398
		ENSMUSG00000053560	718.046	637.042	1310.72	795.754	1260.86	552.757	710.664	658.434
		ENSMUSG00000053565	4030.74	4288.06	4967.23	4691.23	4782.65	4087.14	4221.24	4219.83
		ENSMUSG00000053931	2491.9	2375.91	3080.82	2738.48	3239.89	2356.89	2328.93	2290.82
		ENSMUSG00000054091	1873.06	2101.73	2563.76	2233.73	2730.75	1896.26	1977.79	1998.92
		ENSMUSG00000054312	4170.1	4500.07	5529.24	4810.65	5511.36	3788.69	4183.53	3819.29
		ENSMUSG00000054404	5367.63	4989.32	6797.93	6364.02	6730.03	5417.21	5764.93	5411.06
		ENSMUSG00000054435	1858.89	1680.77	2409.33	2204.63	3225.51	1587.26	1807.67	1600.27
		ENSMUSG00000054690	2034.86	2181.23	3981.02	3170.97	4008.87	1874.19	2273.62	1964.91
		ENSMUSG00000054717	667.263	668.64	1112.3	884.059	996.225	664.076	796.983	669.77
		ENSMUSG00000054808	6027.8	5898.5	7393.18	6952.06	7262.18	5386.5	6482.29	6209.31
		ENSMUSG00000054855	116.919	168.179	311.796	187.649	254.09	145.866	162.581	154.926
		ENSMUSG00000054920	1032.19	1082.46	1388.91	1157	1266.62	934.697	1019.9	1001.35
		ENSMUSG00000054967	44.8779	35.6744	104.584	83.2882	74.7888	48.942	67.8818	54.7908
		ENSMUSG00000055148	1973.44	2406.49	3478.62	3203.08	3098.94	2344.42	1946.78	2407.96
		ENSMUSG00000055546	116.919	104.985	253.151	137.476	216.696	103.642	137.44	96.3562
		ENSMUSG00000056144	368.471	459.69	683.214	660.285	628.993	427.043	483.553	480.836
		ENSMUSG00000056201	4920.03	4835.41	7158.6	6136.23	7548.87	4349.12	5417.14	4868.82
		ENSMUSG00000056313	3877.21	3625.54	5304.44	4978.23	5192.07	2828.08	3001.88	2927.53
		ENSMUSG00000056492	13280.3	12955.9	20388.9	20095.5	18416.3	15419.6	14412.7	14183.3
		ENSMUSG00000056737	461.77	534.096	822.007	685.372	821.718	507.654	598.366	495.006
		ENSMUSG00000056917	1620.33	1727.66	2006.64	2166.5	2216.82	1522.96	1774.98	1709.85
		ENSMUSG00000057113	7668.21	7220.49	9356.8	8274.63	9011.09	7358.58	6822.54	6996.21
		ENSMUSG00000057143	938.892	1008.06	1256.96	1150.98	1279.08	948.132	964.592	885.154
		ENSMUSG00000057278	484.208	414.842	692.011	480.663	619.405	436.64	438.299	450.607
		ENSMUSG00000057322	4517.31	4052.61	6520.34	5307.37	5738.6	3853.95	4035.2	3822.13
		ENSMUSG00000057375	710.96	720.622	893.358	892.087	959.79	739.888	739.996	754.79
		ENSMUSG00000057596	174.787	157.987	261.948	207.719	241.625	154.503	191.913	171.93
		ENSMUSG00000057841	9296.8	8739.2	13568.5	11097.4	13311.4	8367.17	8711.5	8221.45
		ENSMUSG00000057863	8451.21	7950.29	11348.8	9357.38	10242.2	8261.61	7771.21	7631.03
		ENSMUSG00000058173	710.96	795.029	1329.29	1166.03	1188.95	761.001	893.358	785.019
		ENSMUSG00000058351	624.747	548.366	779.001	667.309	757.476	581.547	548.083	547.908
		ENSMUSG00000058546	15890.3	16256.3	23805.9	19773.4	22097.2	16020.4	16118.2	15229.9
		ENSMUSG00000058558	19443.9	19302.9	28323.6	22648.4	26078.3	19386.8	18846	19069.1
		ENSMUSG00000058587	3315.06	3009.9	4142.29	3507.14	4518.97	2962.43	3291.01	3049.39
		ENSMUSG00000058600	9535.36	8974.65	14202.8	11081.3	12935.6	8869.06	8678.82	8160.99
		ENSMUSG00000058624	1084.15	1128.33	1705.59	1315.55	1467.01	932.778	1113.76	1025.91
		ENSMUSG00000058672	2147.05	2302.53	2792.48	2637.13	3274.41	1783.03	2048.19	2074.49
		ENSMUSG00000058715	376.738	396.495	577.653	587.031	711.452	339.715	450.031	358.029
		ENSMUSG00000058818	478.303	386.303	566.901	523.813	649.128	363.706	439.975	439.271
		ENSMUSG00000059013	1466.8	1369.9	1675.29	1870.47	1685.62	1519.12	1383.62	1482.18
		ENSMUSG00000059070	10373.9	10689.1	14948.6	13304	14526.3	10553.2	10809.1	10538.7
		ENSMUSG00000059089	42.5159	67.2717	116.313	109.378	159.166	58.5385	62.0155	48.1781
		ENSMUSG00000059142	1365.23	1330.14	1720.25	1517.25	1546.59	1338.71	1222.71	1293.25
		ENSMUSG00000059173	377.919	325.146	549.308	408.413	483.251	355.07	375.445	359.919
		ENSMUSG00000059291	10926.6	10173.3	14973	12530.4	14147.5	10277.8	10126.1	9891.62
		ENSMUSG00000059498	975.503	983.593	1489.58	1223.23	1821.78	935.657	938.613	848.312
		ENSMUSG00000059534	15856.1	15882.2	20209.1	18454.9	20842.1	16175.8	16202.8	15577.6
		ENSMUSG00000059555	385.005	398.534	511.189	556.927	531.192	354.11	451.707	431.713
		ENSMUSG00000059588	1362.87	1294.47	1882.5	1509.22	1687.54	1325.27	1230.25	1279.08
		ENSMUSG00000059810	2201.38	2186.33	3118.93	2861.9	2957.99	2274.37	2647.39	2599.73
		ENSMUSG00000059897	693.245	645.197	989.145	791.74	812.13	647.762	562.33	650.877
		ENSMUSG00000060032	614.118	659.466	764.339	777.691	809.253	635.287	623.507	692.442
		ENSMUSG00000060036	8797.24	8340.67	13475.6	9862.13	11370.8	7631.12	8228.78	7889.87
		ENSMUSG00000060073	5360.54	5434.74	6477.34	6135.23	6605.38	5282.86	5011.52	4996.35
		ENSMUSG00000060126	77825.3	76077.1	114932	88927.7	106823	75718.1	70787.3	70752.8
		ENSMUSG00000060288	354.299	404.649	449.611	452.566	509.139	336.836	377.121	349.527
		ENSMUSG00000060519	716.865	798.087	1085.91	1021.53	1074.85	771.557	922.69	804.858
		ENSMUSG00000060538	418.073	363.879	539.534	460.594	536.945	403.052	409.805	345.749
		ENSMUSG00000060591	2666.69	2853.95	4098.31	3596.44	4633.07	2425.99	2660.8	2657.35
		ENSMUSG00000060636	8040.22	7715.86	12069.1	9239.97	11000.7	7557.23	7375.65	7094.46
		ENSMUSG00000060703	516.095	539.193	754.565	631.184	765.147	481.743	527.132	457.22
		ENSMUSG00000060739	3466.22	3516.47	4708.21	4047	4558.28	3583.32	3478.73	3529.28
		ENSMUSG00000060743	11996.6	11219.1	14462.8	12730	14331.6	10999.5	11689.1	11422.9
		ENSMUSG00000060791	135.815	156.967	281.496	174.604	273.267	130.512	171.8	156.815
		ENSMUSG00000060802	9732.59	9914.42	17545.6	16610.5	19793.1	9809.52	13561.3	12102.1
		ENSMUSG00000060938	13313.4	13208.7	21709.4	17377.1	20518	13190.4	13167.4	12784.2
		ENSMUSG00000061119	744.028	703.295	1162.15	1021.53	1247.44	683.269	890.844	815.249
		ENSMUSG00000061232	6625.39	6767.94	11045.8	10627.8	12164.7	7001.59	9273.83	9264.36
		ENSMUSG00000061474	3182.78	3398.24	4197.02	3994.82	4287.89	3282.95	3325.37	3074.9
		ENSMUSG00000061477	13737.3	13496.1	21468	17400.2	21219.9	13441.8	13324.9	13271.6
		ENSMUSG00000061518	38184	42053	45831	45058.9	47077.6	39455	42230.9	38796.6
		ENSMUSG00000061535	413.349	347.57	584.495	467.618	602.146	408.81	426.566	421.322
		ENSMUSG00000061613	1414.83	1319.95	1695.82	1607.56	1702.88	1392.45	1500.94	1335.76
		ENSMUSG00000061740	1130.21	1133.43	1559.96	1627.63	1400.85	1335.83	1180.81	1303.64
		ENSMUSG00000061778	1002.67	857.204	1156.28	1099.81	1147.72	928.939	903.415	924.83
		ENSMUSG00000061787	15069.5	13894.7	20775	16749	18869.8	13481.1	12971.3	12900.4
		ENSMUSG00000061983	10369.1	9097.98	16408.9	11773.7	14568.5	9320.1	9164.04	8791.08
		ENSMUSG00000062006	6717.51	6474.39	11026.2	8547.58	9801.17	6275.14	6512.46	5992.98
		ENSMUSG00000062328	12428.8	12915.1	20084.9	16033.5	18448.9	12422.6	12757.6	12226.8
		ENSMUSG00000062352	1627.41	1620.64	1895.21	1921.65	2069.16	1679.38	1602.35	1590.82
		ENSMUSG00000062515	21220.1	21991.7	38717.4	33075.5	37891.1	23059.4	25074.4	21585.7
		ENSMUSG00000062593	377.919	298.645	531.714	393.361	581.051	314.764	337.733	348.583
		ENSMUSG00000062619	428.702	499.441	624.569	630.181	652.005	485.582	538.864	529.959
		ENSMUSG00000062647	20275.3	21786.9	28182.8	25480.2	27564.5	21690	21667.7	22001.3
		ENSMUSG00000062683	15763.9	15716.1	18950.1	18423.8	18917.7	15330.4	16192.7	15634.3
		ENSMUSG00000062753	197.226	258.894	382.17	339.174	369.15	262.943	275.717	240.89
		ENSMUSG00000062825	16512.7	16419.4	28491.7	21130.1	26810.8	16346.6	17507.6	17615.2
		ENSMUSG00000062981	15074.2	15592.8	20891.3	18748.9	22374.3	15729.6	15417.6	14918.2
		ENSMUSG00000062997	4706.27	4521.47	7221.15	6142.25	7173.97	4323.21	4590.82	4430.5
		ENSMUSG00000063060	989.675	1070.23	1522.81	1463.06	1817.94	1068.09	1334.17	1255.46
		ENSMUSG00000063065	2165.95	2199.58	3479.6	3363.64	3269.61	2507.56	2823.38	2738.59
		ENSMUSG00000063245	216.122	189.584	327.434	294.017	319.291	245.67	206.16	228.61
		ENSMUSG00000063281	575.145	593.214	726.22	679.351	699.946	535.483	559.815	483.67
		ENSMUSG00000063316	7520.58	7516.08	10615.7	8975.06	10145.4	7871.99	7895.24	7678.27
		ENSMUSG00000063457	15864.3	16151.3	23422.8	19705.2	21148.9	15387	15817.3	15392.4
		ENSMUSG00000063524	7267.85	7339.75	8155.56	8622.84	8367.72	6909.46	7372.3	7044.39
		ENSMUSG00000063787	2689.13	2440.13	3344.72	3094.71	3572.6	2497.96	2343.18	2237.92
		ENSMUSG00000063800	821.973	730.815	1026.29	915.167	1092.11	796.508	777.708	750.067
		ENSMUSG00000063882	39263.4	37895.4	49115.2	43138.3	47572.4	37762.1	36988	34991.5
		ENSMUSG00000064023	272.81	312.915	430.063	324.122	433.391	242.791	296.669	305.128
		ENSMUSG00000064262	961.331	782.798	1011.63	1087.76	1164.02	842.571	833.019	865.316
		ENSMUSG00000064326	656.634	673.736	958.845	869.007	928.148	760.041	790.278	800.134
		ENSMUSG00000064357	2.10004e+06	1.95622e+06	2.59284e+06	2.50837e+06	2.39281e+06	2.02514e+06	1.75607e+06	1.633e+06
		ENSMUSG00000064358	3.75382e+06	3.54643e+06	5.02023e+06	4.43024e+06	4.4115e+06	3.57836e+06	3.2404e+06	2.92345e+06
		ENSMUSG00000064360	394152	325138	519600	447611	434980	315713	285974	248614
		ENSMUSG00000064373	18251.1	18819.8	24239.9	22126.6	22860.4	17590.3	18710.2	17921.3
		ENSMUSG00000065990	3415.44	3433.91	3929.21	4045	4267.76	3405.79	3480.41	3370.58
		ENSMUSG00000066000	429.883	430.131	622.614	585.024	528.316	381.94	317.62	315.519
		ENSMUSG00000066149	1381.77	1462.65	1701.68	1648.71	1803.56	1396.29	1416.3	1404.72
		ENSMUSG00000066441	279.896	256.856	392.921	387.34	429.556	309.966	289.964	309.851
		ENSMUSG00000066456	198.407	178.372	256.083	260.903	262.72	160.261	171.8	163.428
		ENSMUSG00000066677	154.711	170.218	271.722	199.691	209.984	132.431	176.828	168.151
		ENSMUSG00000066684	21.2579	19.3661	51.8031	39.1354	50.818	20.1526	30.1697	22.672
		ENSMUSG00000066979	1697.09	1707.27	1902.05	1923.66	2018.34	1630.44	1743.98	1716.46
		ENSMUSG00000067148	870.394	852.108	1045.84	1045.62	1046.08	895.351	919.338	882.32
		ENSMUSG00000067212	1591.98	1694.02	2707.44	2417.36	2663.63	1801.26	1956	1951.69
		ENSMUSG00000067274	35133.5	37466.2	51354.4	44650.5	51725.1	35160.5	37754.9	36127.9
		ENSMUSG00000067288	4642.5	4515.36	7260.25	5875.33	6834.55	4312.66	4721.56	4173.55
		ENSMUSG00000067365	624.747	716.545	925.613	787.726	846.648	618.973	639.43	606.477
		ENSMUSG00000067377	374.376	359.802	721.333	512.774	662.552	307.087	388.016	406.207
		ENSMUSG00000067818	892.833	780.759	1673.34	1458.05	1320.31	828.176	848.942	739.675
		ENSMUSG00000067847	3354.03	3558.26	4027.93	3983.79	4329.12	3320.38	3503.04	3307.28
		ENSMUSG00000067916	594.041	598.31	1040.95	787.726	788.159	607.457	608.422	549.797
		ENSMUSG00000068079	395.634	573.848	887.494	958.316	976.09	544.12	592.499	594.196
		ENSMUSG00000068240	20386.4	22121.2	30558.9	25821.4	29701.7	21572.9	21306.5	20434.1
		ENSMUSG00000068245	591.679	692.083	1086.89	964.337	1144.84	612.255	766.813	704.723
		ENSMUSG00000068270	2093.91	1774.55	2369.26	2130.37	2454.61	1975.91	1831.97	2058.43
		ENSMUSG00000068391	1698.27	1792.89	2076.03	2025.01	2228.32	1889.55	1826.1	1839.27
		ENSMUSG00000068735	2271.06	2659.27	3165.85	3758	3748.07	2521.95	2884.56	2505.26
		ENSMUSG00000068758	145.263	168.179	276.609	268.931	305.867	184.252	207.836	168.151
		ENSMUSG00000068798	3859.5	3643.88	4620.25	4243.68	4605.26	3786.77	3575.11	3453.71
		ENSMUSG00000069516	10562.8	11406.6	14989.7	13585	18661.7	9124.33	10798.2	9421.18
		ENSMUSG00000069662	1784.49	1637.96	2301.81	1934.69	2595.55	1563.27	1847.89	1895.95
		ENSMUSG00000069743	135.815	102.946	189.619	169.587	169.713	95.0051	83.8047	101.08
		ENSMUSG00000069744	4185.45	4432.8	5202.79	5038.43	5503.69	4229.17	4359.52	4172.6
		ENSMUSG00000069792	292.887	285.395	514.121	351.215	437.227	183.293	220.406	241.835
		ENSMUSG00000069893	342.489	379.168	519.008	447.549	495.715	354.11	399.748	452.496
		ENSMUSG00000070003	772.372	800.125	1055.61	990.427	1059.51	736.05	799.497	823.751
		ENSMUSG00000070394	2647.79	2597.09	3550.95	3038.51	3469.05	2556.5	2530.9	2364.51
		ENSMUSG00000070423	285.801	289.472	508.256	510.767	408.462	296.531	309.239	273.954
		ENSMUSG00000070462	785.362	810.318	1360.56	1021.53	1429.62	838.732	975.487	987.179
		ENSMUSG00000070605	509.009	399.553	660.733	524.816	564.751	456.792	437.461	429.824
		ENSMUSG00000070643	859.765	874.532	1228.61	1205.17	1242.64	981.72	1060.97	1050.47
		ENSMUSG00000070720	238.561	217.104	285.406	290.004	353.809	251.428	243.034	204.048
		ENSMUSG00000071001	289.344	308.838	525.85	520.802	510.098	339.715	343.599	323.077
		ENSMUSG00000071176	1332.16	1598.21	1877.62	2066.15	1809.31	1579.58	1545.36	1458.57
		ENSMUSG00000071180	1322.72	1287.34	1611.76	1494.17	1670.28	1193.8	1168.24	1125.1
		ENSMUSG00000071347	2848.56	2865.16	4401.3	4294.86	4696.35	3034.41	3009.43	3385.69
		ENSMUSG00000071379	837.326	775.663	1237.41	1111.85	1317.43	801.306	980.515	955.06
		ENSMUSG00000071415	14676.2	14249.4	20402.6	16925.6	18795	14233.5	14128.6	13775.2
		ENSMUSG00000071528	19550.2	19914.5	29264.8	24207.8	29595.3	18409.9	17932.5	17090.9
		ENSMUSG00000071653	488.932	524.923	699.83	678.347	636.664	507.654	517.913	461.943
		ENSMUSG00000071654	1538.84	1622.67	1986.11	1891.55	1992.45	1643.88	1632.52	1700.4
		ENSMUSG00000071655	3736.67	3723.39	4470.7	4352.06	4383.77	4108.25	4024.3	3963.83
		ENSMUSG00000071662	1817.55	1789.83	2058.44	2087.22	2090.25	1736	1804.32	1710.79
		ENSMUSG00000071866	12549.3	12134.4	18478.1	14991.9	17341.4	11982.2	12005.9	11841.4
		ENSMUSG00000072115	139.358	147.794	210.144	207.719	197.519	143.947	148.334	136.032
		ENSMUSG00000072235	5888.45	6135.99	8182.93	7141.71	10440.7	4868.29	6473.08	5712.41
		ENSMUSG00000072620	435.788	416.881	999.897	616.132	981.843	456.792	569.872	563.022
		ENSMUSG00000072772	4569.27	4718.19	5676.83	5611.42	5981.19	4776.17	5138.9	4635.49
		ENSMUSG00000073411	9123.2	9619.85	14878.2	14582.5	16375.9	9469.8	11981.6	11725.2
		ENSMUSG00000073489	496.018	495.364	780.955	592.049	790.077	383.859	488.581	432.658
		ENSMUSG00000073599	654.272	655.389	1151.4	881.049	1208.13	605.538	745.024	744.399
		ENSMUSG00000073616	2110.44	2042.61	2641.96	2292.93	2822.8	1989.35	1914.94	1865.72
		ENSMUSG00000073676	5391.25	6070.76	6800.86	6760.39	7396.42	5393.22	5345.9	5397.84
		ENSMUSG00000073702	12036.7	12227.1	19675.4	15345.1	17957	12333.4	12280.7	11624.1
		ENSMUSG00000073791	69.6788	70.3295	187.664	105.365	137.113	33.5877	86.3188	35.8974
		ENSMUSG00000073982	653.091	710.43	972.529	906.136	1077.73	697.664	823.8	734.952
		ENSMUSG00000073987	493.656	475.998	665.62	542.879	671.182	441.438	473.497	453.441
		ENSMUSG00000074129	14162.5	14065.9	22214.7	17413.3	20193.9	14176.9	13682	13711.9
		ENSMUSG00000074218	37084.5	37077.9	44204.6	40990.8	47472.7	33725.9	35571.7	30840.6
		ENSMUSG00000074272	1528.21	1621.66	1943.1	1992.9	1860.13	1375.18	1494.24	1375.44
		ENSMUSG00000074364	5888.45	6043.24	8670.66	8970.04	9221.08	5747.33	7356.38	7581.91
		ENSMUSG00000074457	2206.1	2338.2	3615.46	3130.83	3564.93	2120.82	2607.16	2414.57
		ENSMUSG00000074874	344.851	336.358	520.963	372.288	518.727	246.629	249.738	188.934
		ENSMUSG00000075284	1062.9	1073.29	1405.52	1296.49	1429.62	1082.48	1171.59	1081.65
		ENSMUSG00000075602	5300.31	5373.58	9384.17	7880.27	9268.06	4781.92	5554.58	5478.13
		ENSMUSG00000075702	1081.79	1197.64	1785.74	1476.11	1602.21	1104.55	1247.85	1228.07
		ENSMUSG00000075706	29702.1	32260.8	37894.4	39084.2	39909.4	30816.2	32831.3	31429.1
		ENSMUSG00000076432	3766.2	3581.71	4958.43	4574.83	5297.54	3396.19	3679.03	3441.43
		ENSMUSG00000078193	2980.83	2859.05	4832.35	3751.98	4585.13	2968.19	2752.15	2794.33
		ENSMUSG00000078202	536.172	588.118	1067.34	932.226	1042.25	594.022	622.669	636.707
		ENSMUSG00000078495	416.892	433.189	679.304	561.945	666.387	402.092	347.79	403.373
		ENSMUSG00000078570	534.991	525.942	720.356	596.063	707.617	534.524	505.342	554.52
		ENSMUSG00000078572	1293.19	1263.89	1724.16	1632.65	1761.37	1390.53	1319.09	1255.46
		ENSMUSG00000078606	2934.78	3880.35	5021.96	4822.69	5484.51	2411.59	2713.6	3724.83
		ENSMUSG00000078695	2063.2	2217.93	2550.08	2691.31	2704.86	2096.83	2269.43	1935.63
		ENSMUSG00000078784	1026.29	1033.54	1582.44	1346.66	1447.83	975.002	883.302	889.878
		ENSMUSG00000078920	159.434	232.393	338.186	321.111	399.832	166.979	230.463	186.1
		ENSMUSG00000078921	866.851	1471.82	1830.7	1871.48	2238.87	834.894	1152.31	1294.2
		ENSMUSG00000078922	448.779	695.141	737.949	894.094	1139.09	402.092	398.072	632.928
		ENSMUSG00000078974	2468.28	2281.12	3872.52	2784.64	3161.26	2121.78	2036.45	1964.91
		ENSMUSG00000079017	762.924	1033.54	1922.58	1506.21	2094.09	713.018	1088.62	924.83
		ENSMUSG00000079018	6555.71	6475.41	10432	9606.24	10837.7	6932.5	6527.55	6878.13
		ENSMUSG00000079111	1490.42	1515.65	1845.36	1676.8	1875.47	1378.05	1604.86	1547.37
		ENSMUSG00000079197	2698.58	2643.98	3524.56	3187.03	3483.43	2805.05	3069.77	2748.99
		ENSMUSG00000079363	1258.94	1621.66	1836.56	1989.89	2099.84	1184.21	1267.97	1712.68
		ENSMUSG00000079435	4134.67	3880.35	6456.81	5006.32	5715.59	3799.25	3819.82	3623.75
		ENSMUSG00000079478	670.806	733.873	855.239	842.917	833.224	727.413	745.862	722.671
		ENSMUSG00000079480	655.453	573.848	808.323	766.653	815.965	586.345	611.774	551.686
		ENSMUSG00000079523	1054.63	995.825	1781.83	1485.14	2037.52	910.706	1314.9	1058.03
		ENSMUSG00000079592	145.263	147.794	237.512	217.753	252.172	144.907	176.828	187.989
		ENSMUSG00000079641	4823.19	3683.63	7185.96	5084.59	6102	3763.74	3683.22	3549.12
		ENSMUSG00000084957	1491.6	1554.38	1895.21	1700.89	2018.34	1406.84	1417.98	1504.86
		ENSMUSG00000086316	572.783	629.908	725.243	732.535	780.488	577.708	659.543	612.145
		ENSMUSG00000087260	1878.97	1820.41	2336.02	2248.78	2388.45	1897.22	1862.98	1788.26
		ENSMUSG00000087687	611.756	577.925	836.668	728.521	821.718	570.99	618.479	510.121
		ENSMUSG00000089762	177.149	163.083	338.186	227.788	312.579	155.463	231.301	207.827
		ENSMUSG00000089847	1134.94	1144.64	1367.41	1254.34	1425.78	1124.71	1132.2	1144.94
		ENSMUSG00000090000	2056.11	2111.92	2402.49	2302.97	2546.65	2022.94	1949.3	1854.38
		ENSMUSG00000090019	310.602	373.052	507.279	513.778	563.792	332.998	413.995	369.365
		ENSMUSG00000090137	7263.13	7325.48	9360.71	8145.18	9148.2	7068.77	6993.5	6992.44
		ENSMUSG00000090247	3646.92	3841.62	4554.76	4602.93	4693.48	3652.42	3805.57	3576.51
		ENSMUSG00000090258	2769.44	2753.04	3453.21	3194.05	3307.01	2771.46	2798.24	2739.54
		ENSMUSG00000090266	1821.1	1881.57	2270.54	2095.25	2430.64	1727.37	1718.83	1521.86
		ENSMUSG00000090272	1544.74	1444.3	2034	1677.81	1911.91	1501.85	1279.7	1572.87
		ENSMUSG00000090553	1224.69	1152.79	1571.69	1292.47	1602.21	1094.96	1147.29	1024.02
		ENSMUSG00000090698	764.105	791.971	1810.17	1019.53	1336.61	808.023	666.247	662.213
		ENSMUSG00000090841	8041.4	8068.52	13076.9	10872.6	13382.4	7082.2	8090.51	7535.62
		ENSMUSG00000090862	9888.48	8877.82	12518.7	10400	11596.1	8534.15	8809.55	8222.39
		ENSMUSG00000090958	723.951	870.455	1215.91	1465.07	1460.3	796.508	1051.75	896.49
		ENSMUSG00000091537	2813.13	3064.94	3645.76	3517.17	3939.84	2772.42	3053.84	2975.71
		ENSMUSG00000091625	203.131	179.391	294.202	268.931	286.69	182.333	163.419	161.538
		ENSMUSG00000091649	63.7738	68.2909	95.7868	99.3438	141.907	57.5789	89.671	68.9608
		ENSMUSG00000091803	1190.44	1030.48	1419.21	1276.42	1372.09	1119.91	1017.39	1031.58
		ENSMUSG00000091937	236.199	243.605	363.599	297.028	350.932	251.428	233.815	214.44
		ENSMUSG00000093674	13169.3	13603.1	20723.2	17152.4	19668.5	12927.4	13567.1	12952.3
		ENSMUSG00000094686	1105.41	820.511	1774.99	1620.61	1381.68	1020.11	1028.28	1179.89
		ENSMUSG00000095098	747.571	825.607	1340.04	1218.22	1178.4	853.127	1003.14	1090.15
		ENSMUSG00000095115	2775.34	2640.92	3966.35	3401.77	3836.28	2885.66	3224.81	2973.82
		ENSMUSG00000095366	40.1539	32.6166	68.4191	65.2257	84.3771	24.9508	41.9024	47.2334
		ENSMUSG00000095677	538.534	589.137	897.268	789.733	880.207	565.232	601.718	593.252
		ENSMUSG00000095742	1099.51	1189.49	2026.18	1626.63	1912.87	1257.14	1298.13	1534.14
		ENSMUSG00000096145	562.154	515.75	777.046	679.351	803.5	509.573	558.139	527.125
		ENSMUSG00000096255	1346.34	1440.23	2231.44	2003.93	2337.63	1466.34	1743.14	1508.64
		ENSMUSG00000096727	394.453	381.206	634.343	555.924	564.751	340.675	461.764	468.556
		ENSMUSG00000096768	2268.69	1144.64	3703.43	2721.42	3714.51	1615.09	1947.62	2490.15
		ENSMUSG00000096850	40.1539	32.6166	68.4191	65.2257	84.3771	24.9508	41.9024	47.2334
		ENSMUSG00000097328	594.041	660.486	958.845	781.705	944.448	627.61	690.551	744.399
		ENSMUSG00000097771	1120.77	1112.02	1585.37	1440.99	1602.21	1138.14	1325.79	1217.68
		ENSMUSG00000098274	12071	12183.3	16172.3	14214.2	16047	11766.2	11826.5	11631.7
		ENSMUSG00000103205	1032.19	1044.75	1392.82	1328.6	1422.9	1207.24	1124.66	1158.16
		ENSMUSG00000106918	3769.74	3570.5	4684.76	4042.99	4721.28	3422.1	3346.32	3364.91
		ENSMUSG00000107002	2748.18	2830.51	3273.37	3056.58	3488.23	2784.9	2689.29	2935.08
		ENSMUSG00000110195	4646.04	4993.39	5910.44	6431.25	5675.32	4927.79	4983.87	4707.28
		ENSMUSG00000110234	95.6607	139.64	203.303	209.726	211.902	118.996	155.877	127.53
		ENSMUSG00000000085	2534.42	2463.57	1959.72	2041.06	1955.06	2370.33	2539.28	2398.51
		ENSMUSG00000000168	24275.4	25167.8	16774.4	19390.1	18163.1	23926.9	24079.6	23496.7
		ENSMUSG00000000194	2911.16	2790.76	2372.19	2540.79	2340.51	2610.24	2830.08	2885.96
		ENSMUSG00000000266	1473.88	1418.82	1160.19	1238.28	1187.03	1393.41	1335.01	1380.16
		ENSMUSG00000000325	1616.78	1650.19	1047.79	1262.37	1292.5	1467.3	1389.48	1558.7
		ENSMUSG00000000374	4373.23	4506.18	3487.42	3911.54	3595.62	4496.91	4590.82	4547.63
		ENSMUSG00000000384	3852.41	3655.09	3054.43	3487.07	3175.65	3735.91	3828.2	3906.2
		ENSMUSG00000000441	8655.52	8338.63	7078.45	7489.92	7419.43	8209.79	8708.15	8803.37
		ENSMUSG00000000538	10214.4	10798.1	8240.6	9488.83	8444.42	10843.1	11341.3	11147.1
		ENSMUSG00000000561	2617.09	2729.6	2180.62	2346.12	2267.63	2607.36	2591.24	2680.02
		ENSMUSG00000000628	18683.4	18501.8	12382.9	15487.6	12589.4	18519.3	18904.7	20356.7
		ENSMUSG00000000631	11952.9	11516.7	8526.98	10067.8	8710.02	11529.2	11027	12268.4
		ENSMUSG00000000738	6334.86	6897.39	5442.25	6003.77	5260.15	6519.85	6669.18	6800.67
		ENSMUSG00000000804	2349	2198.56	1886.41	2135.39	1833.28	2480.69	2340.67	2473.14
		ENSMUSG00000000826	5731.37	5399.06	4610.47	4907.98	4744.29	5402.82	5277.18	5544.26
		ENSMUSG00000001100	8387.44	8799.34	7064.76	7612.34	7471.21	8445.86	8503.66	8604.99
		ENSMUSG00000001143	1695.91	1887.68	1342.97	1558.39	1420.99	1785.9	1895.66	1890.28
		ENSMUSG00000001151	4542.11	4298.25	3391.63	3580.39	3110.45	4797.28	4398.91	4752.63
		ENSMUSG00000001333	1320.35	1349.51	979.371	927.208	936.778	1177.49	1091.14	1375.44
		ENSMUSG00000001415	4989.71	4962.82	4092.44	4489.54	4052.02	4945.06	4972.13	5551.82
		ENSMUSG00000001419	8203.2	8814.63	6628.84	7534.07	6270.75	8818.2	9300.65	9109.44
		ENSMUSG00000001424	3583.14	3674.46	2981.12	3283.36	2978.13	3796.37	3829.04	3887.31
		ENSMUSG00000001440	8750	8596.51	7158.6	7421.68	7075.21	8569.65	8921.01	9082.99
		ENSMUSG00000001441	6202.59	6584.47	4543.03	5222.07	4988.8	6515.05	6848.52	6423.75
		ENSMUSG00000001482	5156.23	5170.75	4372.96	4660.13	4161.33	5038.15	5204.27	5247.63
		ENSMUSG00000001924	9610.95	10026.5	7769.48	9053.33	8496.2	10008.2	10424.5	10312.9
		ENSMUSG00000001995	4303.55	4485.8	3676.06	3481.05	3306.05	4161.99	4446.68	4928.34
		ENSMUSG00000001998	766.467	671.698	599.156	535.854	571.463	737.009	667.924	699.999
		ENSMUSG00000002028	4766.5	3999.61	3329.08	3445.92	3009.77	4544.89	3343.81	4387.99
		ENSMUSG00000002032	904.643	949.958	704.717	843.92	744.053	975.002	1051.75	1003.24
		ENSMUSG00000002107	4063.81	3600.05	2892.17	3232.18	2803.62	4029.56	3672.32	3614.3
		ENSMUSG00000002129	2037.22	2198.56	1528.68	1598.53	1663.57	1913.54	2099.31	2030.09
		ENSMUSG00000002222	8282.33	7742.36	6197.8	6621.91	5900.64	7806.73	7592.71	7470.44
		ENSMUSG00000002249	856.222	831.723	593.292	677.344	617.487	750.445	775.194	695.276
		ENSMUSG00000002266	387.367	323.108	245.331	246.854	243.543	444.317	349.466	403.373
		ENSMUSG00000002280	2769.44	2683.73	2171.82	2149.44	2297.36	2544.99	2523.36	2485.42
		ENSMUSG00000002346	4566.91	4909.81	3290.96	4494.55	3023.19	5224.32	5393.67	4968.01
		ENSMUSG00000002496	6033.71	6435.66	4709.19	5921.49	4820.04	6456.51	6325.58	6699.59
		ENSMUSG00000002546	5535.33	5633.49	4610.47	5101.65	4378.98	5868.25	6005.45	6018.48
		ENSMUSG00000002625	2338.37	2456.44	1977.31	1919.64	1864.93	2331.94	2198.2	2365.45
		ENSMUSG00000002781	6065.6	7147.11	4884.15	6140.25	5245.76	6516.01	7157.76	6941.42
		ENSMUSG00000002812	6395.09	6803.61	5074.74	5945.57	5240.97	6448.83	6721.14	6687.31
		ENSMUSG00000002831	19361.3	22333.2	14960.3	18503	16042.2	23795.4	20308.4	17295
		ENSMUSG00000003233	1864.79	1834.68	1305.83	1488.15	1354.83	2066.12	2059.92	2171.79
		ENSMUSG00000003316	10092.8	9902.19	7569.11	7903.35	7169.18	10205.9	10511.6	11301.1
		ENSMUSG00000003452	819.611	665.582	512.166	579.004	485.168	789.79	654.515	604.588
		ENSMUSG00000003476	1607.34	1538.08	1257.93	1498.18	1145.8	1753.28	1768.28	1786.37
		ENSMUSG00000003575	957.788	967.285	755.543	795.754	710.494	1046.02	997.276	1084.48
		ENSMUSG00000003731	6350.22	6060.57	4322.13	4960.16	4400.07	6160.94	6002.93	6085.55
		ENSMUSG00000003810	10040.8	10136.6	6417.71	7846.15	6834.55	10309.5	9358.47	9229.41
		ENSMUSG00000003865	6917.09	6946.31	4342.66	6118.17	4607.18	7027.5	7798.87	7457.21
		ENSMUSG00000004069	10089.3	10374.1	7602.34	9064.37	8432.92	10044.6	10038.1	9868.95
		ENSMUSG00000004085	14600.7	14496	9443.79	11418.5	10206.8	14151.9	14301.3	14125.6
		ENSMUSG00000004347	5934.51	6062.61	4039.66	3821.22	3867.92	6293.37	4481.04	4984.07
		ENSMUSG00000004364	9107.84	8826.86	6889.81	7132.68	6779.89	8809.57	8025.14	8494.46
		ENSMUSG00000004383	4106.32	4081.15	2936.16	3541.25	2921.56	4049.71	4158.39	4030.9
		ENSMUSG00000004677	2802.5	2635.83	2092.65	2026.01	2232.16	2592.97	2308.82	2591.23
		ENSMUSG00000004698	1558.92	1489.15	1268.69	1181.09	1118.96	1466.34	1429.71	1717.41
		ENSMUSG00000004789	38219.4	39800.4	28934.4	33491.9	31609.8	37323.6	37939.2	37093.4
		ENSMUSG00000004798	6096.3	6406.1	5054.22	5552.21	5145.09	6154.22	6109.36	6146.96
		ENSMUSG00000005069	1623.87	1649.18	1369.36	1466.07	1397.98	1722.57	1810.18	1793.93
		ENSMUSG00000005089	66.1358	38.7322	15.6387	20.0694	9.58831	54.6999	23.4653	47.2334
		ENSMUSG00000005198	2878.09	2744.89	2126.86	2362.17	2040.39	2808.89	2919.76	2763.16
		ENSMUSG00000005220	12766.6	14513.4	11088.8	10733.1	9965.13	16294.8	12890	12724.7
		ENSMUSG00000005312	3441.42	3397.22	2815.94	3063.6	2960.87	3292.55	3288.5	3300.67
		ENSMUSG00000005469	13116.1	13663.3	10236.5	11230.9	10598	13217.2	13598.2	14233.3
		ENSMUSG00000005501	2580.48	2336.16	1783.78	1891.55	1837.12	2385.68	2233.4	2384.34
		ENSMUSG00000005506	6291.17	6232.82	5366.99	5669.62	5319.59	6361.5	6489	6578.67
		ENSMUSG00000005534	12499.7	11892.8	8699	8613.81	7648.59	11958.2	10980.1	12255.2
		ENSMUSG00000005580	1378.22	1400.47	1006.74	1101.81	976.09	1467.3	1472.45	1629.55
		ENSMUSG00000005610	62231.4	60402.8	51344.6	53980.8	52803.8	61045.1	60478.5	59531.1
		ENSMUSG00000005615	7417.84	7132.84	5601.57	6254.64	5788.46	6960.32	7380.68	7468.55
		ENSMUSG00000005683	90046.2	95671.5	67227.7	78441.4	71977.5	89567.8	92747.5	91519.5
		ENSMUSG00000005686	2482.45	2621.56	2069.19	2290.93	2329	2697.57	2827.57	2744.26
		ENSMUSG00000005813	2756.45	2804.01	2239.26	2518.72	2353.93	2716.76	2766.39	2728.2
		ENSMUSG00000005871	4340.16	4121.92	3679.97	3675.72	3392.34	4453.73	3922.06	4224.56
		ENSMUSG00000005886	3814.62	3591.9	2710.37	2853.88	2464.19	3642.82	3763.67	3866.53
		ENSMUSG00000005899	1399.48	1439.21	1111.32	1303.51	1138.13	1391.49	1317.41	1450.07
		ENSMUSG00000005907	974.322	922.437	684.191	788.729	700.905	934.697	923.528	928.609
		ENSMUSG00000005950	1395.94	1507.5	954.936	1087.76	1075.81	1371.34	1337.52	1343.32
		ENSMUSG00000005958	740.485	727.757	373.373	482.67	452.568	651.601	562.33	762.347
		ENSMUSG00000005980	258.638	251.759	153.454	188.653	188.89	265.822	235.491	237.112
		ENSMUSG00000005981	10460.1	10698.2	7957.14	8983.08	8254.57	10571.5	10886.2	11053.6
		ENSMUSG00000005982	2702.12	2569.57	2141.52	2281.9	2285.85	2492.21	2527.55	2725.37
		ENSMUSG00000006005	9659.37	9132.64	7438.14	7745.8	7220.95	9450.61	8393.04	9049.92
		ENSMUSG00000006134	2115.16	2066.06	1676.27	1784.17	1770.96	2086.27	2111.04	2175.57
		ENSMUSG00000006169	3436.7	3594.96	3036.83	3168.97	2873.62	3675.45	3503.87	3793.79
		ENSMUSG00000006219	15890.3	16558	11822.8	13023.1	11643.1	15376.4	16030.2	15503.9
		ENSMUSG00000006221	112326	113990	91869.3	102652	90270.1	103434	117412	108012
		ENSMUSG00000006262	2604.1	2106.83	1674.31	1668.77	1622.34	2283	1939.24	2069.77
		ENSMUSG00000006276	2954.85	2551.23	2115.13	2354.15	2042.31	2738.83	2457.15	2629.01
		ENSMUSG00000006494	11704.9	11669.6	8484.95	9621.29	7754.06	11641.5	11165.3	11475.8
		ENSMUSG00000006527	846.774	827.646	655.846	728.521	704.741	868.481	832.181	786.909
		ENSMUSG00000006676	6913.55	7712.8	5166.62	6369.04	5660.94	7035.18	7386.55	7120.91
		ENSMUSG00000006740	13092.5	12672.6	9164.25	9631.33	9703.37	11831.5	10914.7	11788.5
		ENSMUSG00000007030	899.919	953.015	585.472	792.743	583.928	980.76	925.204	990.957
		ENSMUSG00000007279	1793.93	1715.43	1274.55	1442.99	1339.49	1746.56	1854.6	1781.64
		ENSMUSG00000007617	3319.78	3236.18	1927.46	2136.39	2212.02	3010.41	2613.03	2856.68
		ENSMUSG00000007670	1545.92	1617.58	1298.99	1375.76	1397.02	1569.98	1647.6	1632.39
		ENSMUSG00000008307	177.149	144.736	85.0352	72.25	64.2417	125.714	106.432	126.586
		ENSMUSG00000008348	83501.2	91129.7	67052.7	70928.4	63723.9	73757.6	85559.6	88957.5
		ENSMUSG00000008575	6970.24	5738.48	4492.2	4610.96	4285.01	5609.14	5210.14	5672.73
		ENSMUSG00000008604	4746.42	5027.03	3841.25	4565.8	4000.24	4891.32	5154.83	5065.31
		ENSMUSG00000008658	2214.37	2110.9	1829.72	1851.41	1379.76	2199.51	2095.12	2219.97
		ENSMUSG00000008976	3814.62	3728.48	3108.18	3074.64	3020.32	3680.25	3543.26	3568.96
		ENSMUSG00000009073	8063.84	8190.84	6371.78	7175.83	7075.21	7825.93	8393.04	7954.11
		ENSMUSG00000009090	4944.83	5028.05	3376	4140.33	3528.5	4689.8	4964.59	5064.37
		ENSMUSG00000009207	883.385	828.665	629.456	687.379	556.122	832.974	708.988	710.391
		ENSMUSG00000009406	957.788	990.728	795.617	864.993	840.895	987.477	999.79	981.511
		ENSMUSG00000009545	2282.87	2642.96	2089.72	2073.17	1793.01	2713.88	2569.45	2915.25
		ENSMUSG00000009575	5752.63	5344.02	4699.42	4910.99	4640.74	5549.64	5169.07	5617.94
		ENSMUSG00000009621	1393.58	1270.01	973.506	1110.84	1007.73	1301.28	1278.86	1287.58
		ENSMUSG00000009647	927.082	969.324	764.339	840.91	807.335	937.576	955.374	957.894
		ENSMUSG00000010066	105.109	108.042	55.7127	65.2257	48.9004	81.5701	93.0232	124.696
		ENSMUSG00000010080	1248.31	1352.57	660.733	1146.97	688.44	1083.44	1166.56	1195.95
		ENSMUSG00000010175	4561.01	4132.11	2950.82	2916.09	2265.72	4023.8	4121.52	4373.81
		ENSMUSG00000010277	30820.5	29284.6	24162.7	26464.6	23081	31278.8	29817.7	30963.4
		ENSMUSG00000010453	4318.9	4431.78	3757.19	3903.51	3648.35	4487.31	4320.97	4744.13
		ENSMUSG00000010608	5211.74	5219.67	4021.09	4139.32	3949.42	5136.03	4277.39	4672.33
		ENSMUSG00000011034	56.6878	62.1753	24.4354	45.1563	31.6414	57.5789	51.1209	58.5694
		ENSMUSG00000011256	5398.33	6482.54	3415.09	2795.67	4198.72	4847.18	5357.63	6858.29
		ENSMUSG00000011257	20891.8	23756.1	18538.7	19242.6	20047.2	20970.2	22588.7	23235.1
		ENSMUSG00000011382	1895.5	1948.84	1518.9	1721.96	1400.85	2046.93	1913.26	2005.53
		ENSMUSG00000012117	2019.5	2205.7	1643.04	1744.03	1669.32	1907.78	2012.99	2063.16
		ENSMUSG00000013033	1497.5	1529.92	808.323	1048.63	857.195	1158.29	1085.27	1151.55
		ENSMUSG00000013236	3284.35	3234.14	2426.92	2945.19	2445.02	3669.69	3459.46	3743.72
		ENSMUSG00000013593	59959.2	65577.7	49527.6	56157.3	53012.8	62390.5	63715	63053.8
		ENSMUSG00000013629	971.96	1047.81	734.04	871.014	798.706	1015.31	998.952	939.945
		ENSMUSG00000014355	4549.2	4266.66	3830.49	3971.74	3704.92	4540.09	4420.7	4784.75
		ENSMUSG00000014426	2892.26	2695.96	1948.97	2500.65	2112.3	2617.92	2573.64	2815.11
		ENSMUSG00000014453	294.068	229.335	184.732	150.521	139.989	216.88	181.856	281.511
		ENSMUSG00000014498	4108.69	4127.02	2656.62	3329.52	2820.88	3890.41	4189.4	4165.99
		ENSMUSG00000014592	6592.32	6019.8	4995.57	5113.69	4772.1	6235.79	5903.2	6164.91
		ENSMUSG00000014601	1945.1	1842.84	1550.18	1669.78	1680.83	1805.1	1946.78	1945.07
		ENSMUSG00000014606	32596.7	34868.1	28690.1	30675.1	28561.6	34891.8	33834.5	34061
		ENSMUSG00000014837	203.131	233.412	163.228	169.587	163.96	215.921	227.949	234.278
		ENSMUSG00000015002	5068.84	5008.68	3985.9	4461.44	4103.8	4808.79	4890.84	4744.13
		ENSMUSG00000015016	1510.49	1569.67	1097.64	1416.9	1113.2	1539.27	1642.57	1536.03
		ENSMUSG00000015112	9184.61	9063.33	7120.48	8021.76	6798.11	8976.54	8269.85	9202.96
		ENSMUSG00000015202	1862.43	2066.06	1011.63	1161.02	867.742	1443.31	1475.8	1946.02
		ENSMUSG00000015342	871.575	888.802	534.647	655.267	558.039	854.086	776.87	743.454
		ENSMUSG00000015568	318828	349041	222164	258972	234842	316124	319645	323663
		ENSMUSG00000015597	1332.16	1218.03	940.274	999.458	957.872	1260.98	1093.65	1218.62
		ENSMUSG00000015659	980.227	843.954	561.037	620.146	492.839	901.109	713.178	868.15
		ENSMUSG00000015711	2125.79	2220.98	1785.74	1848.4	1812.19	2343.46	2353.24	2414.57
		ENSMUSG00000016028	578.688	543.27	383.147	459.59	352.85	597.861	520.427	705.667
		ENSMUSG00000016349	55780.8	61032.7	41723	49741.1	42668.9	52906.3	58459.6	59650.1
		ENSMUSG00000016386	824.335	917.341	744.791	701.427	675.976	886.714	900.063	870.984
		ENSMUSG00000016409	905.824	851.089	705.694	758.625	706.658	815.701	875.759	810.526
		ENSMUSG00000016477	666.082	652.331	525.85	581.01	493.798	666.955	677.142	691.497
		ENSMUSG00000016541	4135.85	4143.32	3569.52	3922.57	3612.87	4169.67	4175.15	4134.81
		ENSMUSG00000016664	17329.9	18201.1	12804.2	13428.5	11665.1	16265.1	17162.4	17563.3
		ENSMUSG00000017288	1264.85	1347.47	1056.59	1169.05	1107.45	1246.58	1267.97	1398.11
		ENSMUSG00000017291	7491.06	6307.23	5101.13	5396.67	4850.72	6870.12	5573.01	6622.13
		ENSMUSG00000017376	1372.32	1329.13	1126.96	1146.97	1058.55	1249.46	1233.61	1250.74
		ENSMUSG00000017548	2002.97	2078.29	1667.47	1589.5	1744.11	1967.28	1900.69	1963.02
		ENSMUSG00000017686	5430.22	5333.83	4171.61	4641.06	4272.55	5346.2	5207.62	5218.35
		ENSMUSG00000017692	873.937	931.611	636.298	639.212	722	773.476	791.116	832.253
		ENSMUSG00000017747	858.584	941.804	753.588	714.472	700.905	853.127	886.654	996.625
		ENSMUSG00000017756	12593	13451.3	8521.11	10849.5	8668.79	13535.8	14214.1	14503.5
		ENSMUSG00000017817	28903.7	31179.4	21838.4	24874.1	22986	27720.4	31270.9	31096.6
		ENSMUSG00000018401	2181.3	2476.82	1477.85	1465.07	1528.38	1766.71	1860.46	1813.76
		ENSMUSG00000018411	6417.53	6663.97	4266.42	5361.55	4794.15	6148.46	6431.17	6403.91
		ENSMUSG00000018428	9921.55	10726.8	7879.93	8975.06	7528.74	10109.9	11094.9	10863.7
		ENSMUSG00000018446	6452.96	6810.75	5779.46	5822.15	6021.46	6269.38	6442.91	6708.09
		ENSMUSG00000018501	8631.9	8302.96	6490.04	7354.45	6736.74	8554.3	8520.42	9270.98
		ENSMUSG00000018547	2298.22	2160.85	1857.09	2017.98	1782.47	2282.04	2312.17	2284.21
		ENSMUSG00000018583	6593.5	6781.19	5316.17	5644.53	5634.09	6391.25	6535.93	6414.3
		ENSMUSG00000018707	18081.1	16442.8	12650.7	14753.1	12456.2	16848.5	14413.6	17593.5
		ENSMUSG00000018796	53405.8	57265.5	41776.7	49344.7	39954.5	56304.5	58211.6	54600.9
		ENSMUSG00000018995	1103.05	1103.87	829.826	965.34	868.701	1038.34	1009.01	1065.59
		ENSMUSG00000019132	10913.6	10463.8	9034.26	9113.54	8754.12	10602.2	9928.34	10808
		ENSMUSG00000019143	1980.53	1878.51	1542.36	1671.78	1622.34	1878.03	1913.26	2011.2
		ENSMUSG00000019302	4881.06	4833.37	3062.24	3582.4	2971.42	4687.88	4817.93	4790.41
		ENSMUSG00000019558	13025.2	13567.5	9611.91	9779.84	9632.41	11437.1	12382.1	13228.2
		ENSMUSG00000019731	6880.48	7049.26	5780.44	6255.65	5772.16	7111.95	6895.45	7040.61
		ENSMUSG00000019828	1951.01	1555.4	1039.97	1297.49	839.936	1843.48	1566.31	1547.37
		ENSMUSG00000019838	1416.01	1442.26	905.087	977.382	885.001	1367.5	1204.27	1280.97
		ENSMUSG00000019864	4749.97	4857.83	3304.64	4087.14	3712.59	4588.08	4584.12	4422.94
		ENSMUSG00000019899	8644.89	8561.85	7248.52	7519.02	7567.09	8990.94	8537.19	8675.84
		ENSMUSG00000019907	2712.75	2514.53	1990.02	1881.51	1932.04	2380.89	2360.78	2520.38
		ENSMUSG00000019927	2227.36	2167.98	1820.93	1869.47	1873.56	2161.13	2194.01	2147.23
		ENSMUSG00000019944	5835.3	7201.13	4868.51	4953.14	5194.94	6865.32	6334.8	7358.02
		ENSMUSG00000019947	1162.1	1230.26	917.794	905.132	875.412	1126.63	1046.72	1253.58
		ENSMUSG00000019951	1922.66	1821.43	1278.46	1465.07	1414.28	1706.25	1604.86	1545.48
		ENSMUSG00000019996	1092.42	1242.49	830.804	1034.58	978.007	1296.48	1218.52	1231.85
		ENSMUSG00000020067	8203.2	9308.97	5070.83	6202.46	5292.75	7452.62	8238.84	8312.14
		ENSMUSG00000020079	2333.65	2290.29	1877.62	1947.74	1878.35	2321.39	2109.36	2213.36
		ENSMUSG00000020132	3694.16	3789.64	2939.09	3151.91	2974.29	3744.55	3761.99	3460.32
		ENSMUSG00000020160	1254.22	1250.64	986.213	951.292	897.466	1310.88	1174.1	1362.21
		ENSMUSG00000020169	329.498	310.877	121.2	211.733	117.936	228.396	222.921	272.065
		ENSMUSG00000020170	1854.16	1611.46	1378.16	1371.75	1235.93	1810.86	1690.34	1928.07
		ENSMUSG00000020176	5987.65	6302.13	4429.65	5083.59	5480.68	6051.54	6004.61	6715.65
		ENSMUSG00000020184	3465.04	3373.78	2641.96	2728.44	2818.96	3137.09	3150.22	3150.47
		ENSMUSG00000020189	7813.47	7113.47	5407.07	5549.2	4827.71	7742.44	6747.12	7631.03
		ENSMUSG00000020198	4353.15	4693.73	3609.6	3926.59	3826.69	4419.18	4529.64	4693.11
		ENSMUSG00000020211	806.62	889.821	672.462	720.493	695.152	838.732	967.944	904.992
		ENSMUSG00000020220	9757.39	8390.61	6431.4	7380.54	6094.33	9186.71	7577.62	9199.18
		ENSMUSG00000020250	3532.36	3627.57	2747.52	3259.28	3175.65	3455.69	3719.25	3375.3
		ENSMUSG00000020255	32106.6	28100.2	21149.3	20515	17953.1	26580.3	21661.8	24904.3
		ENSMUSG00000020261	914.091	904.091	689.078	764.646	745.97	920.302	879.111	829.419
		ENSMUSG00000020263	5353.46	4979.12	4244.92	3659.66	3623.42	5358.67	4221.24	4828.2
		ENSMUSG00000020271	3715.41	3742.75	3116	3429.87	3338.65	3757.98	3860.88	3845.75
		ENSMUSG00000020300	5566.04	5656.94	3240.13	3585.41	3108.53	4972.89	4595.01	4734.68
		ENSMUSG00000020311	2920.6	3063.92	2664.44	2465.53	2512.14	3063.2	2816.68	2918.08
		ENSMUSG00000020329	1815.19	1855.07	1404.55	1569.43	1387.43	1759.99	1789.23	2012.14
		ENSMUSG00000020333	1153.83	1042.71	577.653	610.111	415.174	796.508	815.42	769.905
		ENSMUSG00000020334	316.507	331.262	200.37	257.892	196.56	309.007	303.373	250.337
		ENSMUSG00000020340	11373	11405.6	6863.42	10087.9	7212.32	11699.1	11931.3	12845.6
		ENSMUSG00000020354	2173.03	2148.62	1566.8	1644.69	1632.89	2313.71	2167.19	2237.92
		ENSMUSG00000020361	11560.8	11483.1	8096.92	8991.11	8853.84	10671.3	10444.6	10745.6
		ENSMUSG00000020366	3224.12	3139.35	2702.56	2898.03	2786.36	3268.56	3265.87	3226.99
		ENSMUSG00000020393	10775.4	11221.1	7756.77	8736.23	8298.68	9911.24	11600.2	10852.4
		ENSMUSG00000020435	1347.52	1515.65	1051.7	1258.35	870.618	1544.07	1516.03	1353.71
		ENSMUSG00000020439	9541.27	9613.73	7201.6	8031.79	7160.55	9388.23	8179.34	9193.51
		ENSMUSG00000020456	130782	141480	91792.1	116838	94772.7	135760	145923	148632
		ENSMUSG00000020532	1071.16	920.399	763.362	788.729	733.506	1008.59	998.114	895.546
		ENSMUSG00000020542	3701.24	3444.11	2009.57	2170.51	2191.89	3225.38	3154.41	3579.35
		ENSMUSG00000020546	477.122	435.227	395.854	361.25	318.332	472.147	447.517	461.943
		ENSMUSG00000020580	10083.3	9734.01	7023.71	7686.6	7484.63	8836.44	8246.38	8638.05
		ENSMUSG00000020590	6167.16	5969.85	4985.8	5268.23	4651.29	6064.97	5558.77	5633.06
		ENSMUSG00000020593	13319.3	13516.5	8313.9	9991.57	8464.56	12470.6	13674.4	12558.4
		ENSMUSG00000020628	1737.25	1720.52	1470.03	1472.09	1414.28	1682.26	1622.46	1698.51
		ENSMUSG00000020629	2599.37	2890.64	2161.07	2461.52	2255.17	2630.39	2768.91	2645.07
		ENSMUSG00000020646	360.204	383.245	268.789	280.972	280.937	371.384	336.057	319.298
		ENSMUSG00000020647	2532.06	2148.62	1722.21	1671.78	1559.06	2487.41	2196.52	2686.64
		ENSMUSG00000020661	3691.79	3184.19	2595.04	3041.52	2640.62	3482.56	3239.89	3550.06
		ENSMUSG00000020671	8918.88	9078.62	6858.53	7317.32	6984.12	8724.16	8619.31	8473.68
		ENSMUSG00000020716	2651.34	2226.08	1762.28	1734	1504.41	2423.11	2091.77	2270.04
		ENSMUSG00000020721	2308.85	2206.71	1562.89	1691.85	1486.19	2227.34	1937.56	2347.5
		ENSMUSG00000020741	18560.5	19179.6	12841.3	15379.2	13391	18983.8	19530.7	19982.6
		ENSMUSG00000020745	14859.3	14461.4	11736.8	12160.1	11258.6	14674.9	13580.6	14220.1
		ENSMUSG00000020747	6200.23	6512.1	5366.99	5841.21	4840.18	6561.11	7168.65	7050.06
		ENSMUSG00000020777	18691.6	19530.2	13905.7	15979.3	13335.4	20377.2	20266.5	19699.2
		ENSMUSG00000020794	5005.06	4686.59	3565.61	3921.57	3851.62	4455.64	4277.39	4271.79
		ENSMUSG00000020818	1642.77	1550.31	1335.15	1339.64	1292.5	1544.07	1458.2	1681.51
		ENSMUSG00000020821	41460.1	43498.3	35786.1	39741.5	34953.2	44449.9	45319.9	45725.7
		ENSMUSG00000020836	22128.3	20897	15042.4	15664.2	13937.6	20186.2	17952.6	20303.8
		ENSMUSG00000020849	14788.4	14399.2	13162.9	13224.8	13075.6	14121.2	14712.8	14373.1
		ENSMUSG00000020859	15179.3	14108.7	11602.9	12463.1	11743.8	15144.2	13677.8	14426
		ENSMUSG00000020902	4862.16	5335.87	3726.89	4193.51	3558.22	4906.68	4755.08	4421.05
		ENSMUSG00000020919	4431.1	4374.7	3577.34	4030.95	3724.1	4478.68	4811.23	4652.49
		ENSMUSG00000020926	896.376	927.534	493.595	561.945	449.692	837.772	662.895	730.229
		ENSMUSG00000020937	954.245	979.516	787.797	660.285	627.075	1021.07	767.651	931.443
		ENSMUSG00000020964	5223.55	5238.02	3760.12	3780.08	3596.57	4599.59	4852.29	4725.23
		ENSMUSG00000021000	4484.24	4379.79	3678.02	3679.73	3320.43	4378.87	4332.7	4199.05
		ENSMUSG00000021009	2265.15	2220.98	1553.11	1548.36	1447.83	1938.49	1905.72	2280.43
		ENSMUSG00000021027	7456.81	6617.09	4918.36	5378.61	5026.19	6810.62	6085.06	6695.81
		ENSMUSG00000021051	2699.76	2555.3	2014.45	2120.34	2166.96	2545.95	2600.46	2506.21
		ENSMUSG00000021061	11052.9	10635	6711.92	8255.57	6635.11	11586.8	11057.2	11920.8
		ENSMUSG00000021109	4935.38	4656.02	3787.49	3366.65	3512.2	4411.5	4918.5	5164.5
		ENSMUSG00000021133	7806.39	7903.4	6017.95	6778.46	6120.22	8322.06	7736.01	8076.92
		ENSMUSG00000021143	4707.45	4597.92	3717.11	3863.37	3553.43	4754.09	4372.09	4241.56
		ENSMUSG00000021147	2367.9	2286.22	1924.53	1979.85	1811.23	2357.85	2168.03	2322.94
		ENSMUSG00000021156	7226.52	6885.15	6244.71	6399.14	6498	7022.7	7125.08	7347.63
		ENSMUSG00000021188	5283.78	4755.9	2772.93	3053.57	2793.07	4289.63	3787.97	4362.48
		ENSMUSG00000021200	30409.5	30685.1	20138.7	22831	21322.5	27955.5	29655.1	32731.8
		ENSMUSG00000021221	661.358	615.638	415.402	442.531	356.685	558.515	543.054	648.987
		ENSMUSG00000021234	765.286	725.719	512.166	524.816	527.357	770.597	632.726	712.28
		ENSMUSG00000021244	2059.66	2008.98	1432.89	1590.5	1411.4	1841.56	1805.15	1937.52
		ENSMUSG00000021245	996.761	1005	848.397	878.038	799.665	1136.22	981.353	1008.91
		ENSMUSG00000021255	1940.38	1997.77	1524.77	1722.96	1437.29	2001.83	2245.13	2065.05
		ENSMUSG00000021271	727.494	727.757	567.879	586.028	579.134	782.113	750.052	786.909
		ENSMUSG00000021275	1048.72	887.782	707.649	890.08	725.835	934.697	1009.01	1075.03
		ENSMUSG00000021313	111340	105067	74020.7	94807.1	69328.3	135215	108627	128367
		ENSMUSG00000021339	1712.44	1676.7	1229.59	1370.74	1387.43	1694.74	1661.01	1752.36
		ENSMUSG00000021340	1158.56	1212.93	786.82	929.215	904.177	1087.28	1075.21	1084.48
		ENSMUSG00000021371	5331.02	5233.94	4345.59	4251.71	4219.81	5066.94	5056.78	5226.85
		ENSMUSG00000021375	9525.92	9119.39	6652.29	7460.82	6660.04	9412.22	9263.77	9782.99
		ENSMUSG00000021451	1694.73	1618.6	1382.07	1393.82	1397.98	1725.45	1829.46	1788.26
		ENSMUSG00000021481	2092.73	2234.24	1756.42	1708.91	1533.17	2145.77	2088.41	2306.88
		ENSMUSG00000021514	663.72	578.944	467.205	530.837	429.556	677.511	595.851	642.375
		ENSMUSG00000021559	3215.85	3029.26	2201.14	2715.4	2491.04	3275.28	3535.72	3635.08
		ENSMUSG00000021579	8224.46	7841.23	6213.43	6654.03	6105.83	7714.61	7581.81	8023.07
		ENSMUSG00000021604	1607.34	1442.26	1284.32	1232.26	1215.8	1532.56	1511.84	1756.14
		ENSMUSG00000021666	4934.2	5033.14	3490.35	3963.72	3449.87	4576.56	4777.71	4581.64
		ENSMUSG00000021669	3571.33	3368.68	2813	2842.84	2792.12	3478.72	3194.64	3247.77
		ENSMUSG00000021687	2455.29	2439.11	2164.98	2129.37	2053.82	2561.3	2454.64	2479.75
		ENSMUSG00000021690	4128.76	4141.29	2749.47	3006.4	2731.71	4314.58	3948.88	4357.76
		ENSMUSG00000021704	1390.03	1311.8	948.094	955.306	915.683	1237.95	1078.57	1162.89
		ENSMUSG00000021710	1025.1	985.632	762.385	877.035	777.612	973.083	967.106	1010.8
		ENSMUSG00000021733	1374.68	1203.76	914.861	932.226	903.219	1253.3	1195.06	1191.23
		ENSMUSG00000021738	1896.68	1790.85	1477.85	1538.32	1464.13	1843.48	1703.75	1767.47
		ENSMUSG00000021756	11391.9	10717.6	9737.02	10052.8	9825.14	10614.7	11403.3	11522.1
		ENSMUSG00000021763	213.76	214.046	134.883	114.396	104.513	199.607	172.638	172.874
		ENSMUSG00000021770	1575.45	1350.53	1220.79	1067.69	1139.09	1382.85	1361.83	1462.35
		ENSMUSG00000021779	1405.39	1396.4	869.9	1110.84	900.342	1349.26	1201.76	1416.06
		ENSMUSG00000021786	1850.62	1995.73	1464.17	1633.65	1565.77	1867.47	1977.79	1738.19
		ENSMUSG00000021794	9469.23	9330.38	7534.9	8361.93	7851.86	9774.01	9283.89	9851.95
		ENSMUSG00000021798	58461.7	60872.7	42291.8	50637.2	45937.6	57163.3	61425.5	61897.5
		ENSMUSG00000021810	1985.25	2083.38	1643.04	1742.03	1744.11	1982.63	2021.37	1951.69
		ENSMUSG00000021816	4942.47	4625.44	3720.05	3878.42	3758.62	4600.55	4419.02	4332.25
		ENSMUSG00000021820	3429.61	3431.87	2494.37	2853.88	2617.61	3425.94	3441.86	3592.57
		ENSMUSG00000021823	10186.1	9480.21	6946.5	7281.2	6947.69	9321.06	8866.54	9496.75
		ENSMUSG00000021838	4971.99	4605.05	3073	3223.15	3030.86	4640.86	4456.73	4513.63
		ENSMUSG00000021866	4301.19	4604.03	3718.09	3773.06	3682.87	4366.4	4901.74	4654.38
		ENSMUSG00000021910	10287.7	10147.8	7827.15	8941.94	8341.83	10033.1	10312.2	10817.4
		ENSMUSG00000021913	13268.5	14680.5	7022.73	9724.65	8170.2	11780.6	11672.3	9498.64
		ENSMUSG00000021929	5648.71	5380.72	4485.36	4771.51	4399.12	5505.5	5198.41	5295.81
		ENSMUSG00000021944	5583.75	5665.09	4376.87	4697.25	4404.87	5114.92	6077.52	5906.07
		ENSMUSG00000021978	4409.84	4000.63	3180.51	3409.8	3104.69	4178.31	4284.1	4499.46
		ENSMUSG00000021983	457.046	430.131	270.744	300.038	279.979	435.68	340.247	480.836
		ENSMUSG00000022000	1724.25	1741.93	1391.84	1440.99	1377.84	1590.14	1609.89	1668.28
		ENSMUSG00000022016	3688.25	3416.59	2848.19	2804.71	2655	3580.45	3249.95	3580.29
		ENSMUSG00000022040	16197.4	18120.5	12826.6	15556.8	13209.8	18441.6	19368.1	17306.3
		ENSMUSG00000022043	5921.52	5855.69	5027.83	5286.29	5301.38	5865.37	6023.04	6362.34
		ENSMUSG00000022052	2731.64	2917.14	2328.21	2409.34	2364.48	2670.7	2809.97	2625.23
		ENSMUSG00000022075	1471.52	1431.05	1221.77	1139.94	1162.1	1569.02	1471.61	1730.63
		ENSMUSG00000022094	3838.24	4257.48	2520.76	3032.49	3151.68	3712.88	3743.56	3667.2
		ENSMUSG00000022100	3876.03	3826.33	3198.11	3234.19	2963.75	3822.28	3921.22	4049.79
		ENSMUSG00000022105	1815.19	1620.64	1388.91	1428.94	1321.27	1682.26	1497.59	1649.39
		ENSMUSG00000022119	1909.67	1774.55	1348.83	1384.79	1432.49	1651.55	1556.25	1683.4
		ENSMUSG00000022139	10244	10427.1	7945.42	8628.86	8128.97	10278.8	9796.77	10236.4
		ENSMUSG00000022185	4598.8	4822.16	3815.83	4018.91	4153.65	4622.62	4478.52	4760.18
		ENSMUSG00000022191	2750.54	2957.92	2561.81	2566.88	2465.15	3065.11	3121.73	3290.28
		ENSMUSG00000022195	1188.08	1107.94	921.703	995.445	907.054	1201.48	1092.81	1133.6
		ENSMUSG00000022237	2992.64	2502.3	2034.98	1964.8	1699.05	2619.84	2521.68	3321.45
		ENSMUSG00000022263	3583.14	2934.47	2572.56	2725.43	2647.33	3447.05	3276.76	3556.68
		ENSMUSG00000022270	16793.8	17400.9	15523.3	13173.6	12321.9	18801.4	17740.6	19754
		ENSMUSG00000022350	2266.33	2295.39	1910.85	2062.14	1830.41	2242.7	2158.81	2282.32
		ENSMUSG00000022358	12767.8	14529.7	7658.06	10007.6	7208.49	13385.2	12839.7	13571.1
		ENSMUSG00000022383	3100.12	2548.17	1902.05	2030.02	1772.88	3061.28	2804.11	3278.94
		ENSMUSG00000022387	2176.58	2049.75	1834.61	1791.2	1802.6	2167.84	1945.11	2252.09
		ENSMUSG00000022401	1036.91	1082.46	819.075	908.142	801.582	1009.55	1074.38	1104.32
		ENSMUSG00000022412	1431.37	1328.11	1164.1	1212.19	1154.43	1362.7	1407.08	1433.06
		ENSMUSG00000022438	5903.8	5832.25	4465.81	4840.75	4920.72	5393.22	6108.52	5829.55
		ENSMUSG00000022477	156813	166869	122924	146794	130894	161894	164570	166146
		ENSMUSG00000022517	12620.1	12892.7	10731.1	11231.9	9728.3	13283.4	13631.7	14164.4
		ENSMUSG00000022519	66382.6	68068.7	46416.5	51458.1	51062.5	59722.7	62286.2	62668.4
		ENSMUSG00000022533	3684.71	3404.35	2551.06	2920.1	2603.23	3573.73	3345.48	3317.68
		ENSMUSG00000022558	1981.71	1926.42	1258.91	1713.93	1363.46	1889.55	1837	1774.09
		ENSMUSG00000022562	3253.64	3382.95	1933.33	2775.6	2199.56	3197.55	3275.93	3212.82
		ENSMUSG00000022565	15745	15006.7	10056.6	12193.2	10585.5	15175.9	14176.4	16339
		ENSMUSG00000022604	598.765	567.732	409.537	456.58	464.074	606.497	517.913	518.623
		ENSMUSG00000022629	2384.43	2341.26	1609.8	1957.77	1750.82	2433.67	2339.83	2512.82
		ENSMUSG00000022641	1333.34	1162.98	1022.38	1126.9	951.16	1310.88	1216.84	1226.18
		ENSMUSG00000022672	1034.55	944.861	748.701	873.021	699.946	1037.38	903.415	951.281
		ENSMUSG00000022682	2794.24	2741.83	2034	2244.77	2037.52	2684.13	2657.45	2725.37
		ENSMUSG00000022698	3820.52	3749.89	2886.31	3116.79	3012.65	3540.14	3435.99	3190.15
		ENSMUSG00000022708	21627.6	17089	10115.3	13074.2	9331.34	20259.1	13848.7	18343.6
		ENSMUSG00000022711	2062.02	2119.06	1722.21	1768.12	1657.82	1944.25	1898.18	2049.93
		ENSMUSG00000022723	3492.21	3231.08	2594.06	2821.76	2749.93	3254.17	3053.84	3251.55
		ENSMUSG00000022724	1340.43	1405.57	1169.97	1139.94	1191.83	1281.13	1314.9	1420.78
		ENSMUSG00000022742	2357.27	2510.46	1565.82	1953.76	1852.46	2218.71	2496.54	2221.86
		ENSMUSG00000022788	5620.36	4912.87	3661.4	3836.27	3216.88	5306.85	4356.17	4734.68
		ENSMUSG00000022800	5642.8	5088.19	4484.39	4385.17	4449.93	5314.53	4828.83	5118.21
		ENSMUSG00000022812	3741.4	3377.85	2681.05	3073.64	2532.27	3785.81	3706.68	3780.56
		ENSMUSG00000022840	4819.65	5111.63	3247.95	3631.57	3200.58	4366.4	4367.9	4502.29
		ENSMUSG00000022865	3789.82	3573.55	2157.16	2440.44	2240.79	3152.44	2746.28	2964.37
		ENSMUSG00000022867	4889.32	4563.26	3888.16	3813.19	4080.78	4598.63	4660.38	4609.98
		ENSMUSG00000022897	3260.73	3112.84	2418.13	2623.08	2531.31	3197.55	3238.21	3174.09
		ENSMUSG00000022905	8903.53	8455.85	6287.72	7041.37	6605.38	8410.35	7988.26	8092.03
		ENSMUSG00000022973	1728.98	1609.42	1380.11	1427.94	1309.76	1615.09	1549.55	1653.17
		ENSMUSG00000022983	1130.21	1075.33	862.081	1012.5	923.354	1217.79	1184.16	1119.43
		ENSMUSG00000022994	15807.6	15698.8	11761.2	11926.3	10969	16335.1	14559.4	16675.3
		ENSMUSG00000022995	7413.11	6955.48	4559.65	4848.78	4898.67	6399.89	6299.6	6465.31
		ENSMUSG00000023007	1215.25	1195.6	993.055	1032.57	1004.85	1262.9	1165.72	1262.08
		ENSMUSG00000023018	2156.5	2015.09	1664.54	1615.59	1533.17	1976.87	2101.82	2251.14
		ENSMUSG00000023026	2293.49	2001.84	1732.96	1702.89	1625.22	2153.45	1902.37	2246.42
		ENSMUSG00000023027	2595.83	2698	2059.42	2162.48	2082.58	2504.68	2346.53	2401.35
		ENSMUSG00000023036	85.0317	84.5992	41.0515	23.0799	58.4887	86.3683	60.3394	71.7948
		ENSMUSG00000023066	474.76	471.921	310.818	362.254	313.538	447.196	388.854	450.607
		ENSMUSG00000023460	9443.25	9696.3	7886.77	8172.28	7480.8	9359.44	8949.5	8475.57
		ENSMUSG00000023800	510.19	487.21	176.912	257.892	283.814	412.649	370.417	387.314
		ENSMUSG00000023809	4392.13	4483.76	2908.79	3841.29	3139.21	4219.57	4710.66	4384.21
		ENSMUSG00000023828	573.964	519.827	296.157	450.559	260.802	498.057	568.196	490.283
		ENSMUSG00000023830	12323.7	11727.7	8940.43	9860.12	8186.5	12177.9	12087.2	13437.9
		ENSMUSG00000023845	6879.3	6309.27	4440.4	4573.83	4053.94	7109.07	6373.35	6967.87
		ENSMUSG00000023923	1537.66	1507.5	1156.28	1324.58	1181.28	1578.62	1578.04	1484.07
		ENSMUSG00000023951	21201.2	22562.5	13085.6	12968.9	13926.1	16722.8	16616	19190.9
		ENSMUSG00000023965	1723.07	1598.21	1266.73	1383.79	1244.56	1614.13	1675.26	1672.06
		ENSMUSG00000023977	8288.23	8027.75	4945.73	5916.47	5026.19	8423.79	7301.07	7964.5
		ENSMUSG00000023988	1425.46	1597.19	1090.8	1294.48	1310.72	1395.33	1614.92	1573.82
		ENSMUSG00000024002	2163.59	2106.83	1778.9	1932.69	1750.82	2105.47	2127.8	2141.56
		ENSMUSG00000024008	194.864	193.661	98.719	91.316	88.2124	150.665	113.974	164.372
		ENSMUSG00000024049	91214.2	89588.5	51998.5	63092.3	57792.6	81199.6	78991	82738.8
		ENSMUSG00000024059	12094.6	11772.5	9824.01	10526.4	9099.3	13065.6	13154.8	13240.5
		ENSMUSG00000024073	6040.8	5141.19	4366.12	4797.6	4173.79	5677.28	4804.52	5705.8
		ENSMUSG00000024077	2894.62	2687.81	2256.85	2224.7	2064.36	2869.35	2622.25	2860.46
		ENSMUSG00000024104	2168.31	2123.13	1860.02	1766.11	1723.02	2269.57	2038.13	1997.97
		ENSMUSG00000024112	413.349	499.441	365.554	274.951	270.39	394.415	471.82	579.082
		ENSMUSG00000024120	16583.5	15621.3	10069.3	12061.7	9970.88	15782.4	14587.9	15376.4
		ENSMUSG00000024122	3997.67	3857.93	2908.79	3108.76	2976.21	4011.33	3746.91	3857.08
		ENSMUSG00000024143	10192	10270.1	7334.53	8631.87	7991.85	9538.9	9490.88	9131.17
		ENSMUSG00000024163	6725.77	6789.34	4900.76	5451.87	4970.58	6983.36	6291.22	6632.52
		ENSMUSG00000024219	5648.71	5366.45	3711.25	4097.18	3798.89	4598.63	4967.94	5327.93
		ENSMUSG00000024236	22185	20537.2	15656.3	17103.2	15142.8	21697.6	20734.1	22209.2
		ENSMUSG00000024251	656.634	664.563	549.308	568.969	521.604	621.852	698.093	682.995
		ENSMUSG00000024298	1750.24	1529.92	1176.81	1214.2	1061.43	1720.65	1509.32	1622
		ENSMUSG00000024304	16954.4	16879.1	13849	14894.5	12048.7	18374.4	18276.1	19387.4
		ENSMUSG00000024331	3358.75	3353.39	3128.71	2715.4	2613.77	3836.67	3366.44	3568.96
		ENSMUSG00000024359	54386.1	54944.7	39820.9	42816.2	40424.3	53744.1	51460.3	53439.9
		ENSMUSG00000024370	2678.5	2560.4	2229.49	2291.93	2241.75	2608.32	2752.98	2620.51
		ENSMUSG00000024383	1867.16	1590.06	1409.43	1345.66	1282.92	1711.05	1455.69	1658.84
		ENSMUSG00000024384	2370.26	2190.41	1818.97	1821.3	1902.32	2215.83	2057.41	2088.66
		ENSMUSG00000024393	10782.5	11120.2	8704.87	9354.37	8376.35	10953.4	11367.3	11786.6
		ENSMUSG00000024442	10389.2	10780.8	8123.31	8898.79	7979.39	10233.7	10546.8	10602
		ENSMUSG00000024483	4108.69	3838.56	3294.87	3458.97	3234.14	4114.97	3559.19	3996.89
		ENSMUSG00000024527	10538	10452.6	7576.93	8694.08	8128.01	10475.5	10121.9	10580.3
		ENSMUSG00000024548	1021.56	936.707	648.027	780.701	534.069	761.96	777.708	1090.15
		ENSMUSG00000024576	12867	12920.2	10475	10310.7	9965.13	12188.5	11724.3	11944.4
		ENSMUSG00000024589	1486.87	1528.9	1131.85	1228.25	1188.95	1466.34	1496.75	1475.57
		ENSMUSG00000024601	3905.55	4023.05	3368.18	3470.01	3327.14	4230.13	3935.47	3859.92
		ENSMUSG00000024617	2684.4	2855.99	2135.65	2616.05	2019.3	2793.53	2965.85	2950.2
		ENSMUSG00000024622	1525.85	1507.5	1239.36	1244.31	1330.86	1586.3	1459.88	1518.08
		ENSMUSG00000024687	7834.73	7635.34	5774.57	6177.38	5251.52	8435.3	8043.58	8910.11
		ENSMUSG00000024740	12434.7	12555.3	9825.96	11105.4	10406.2	12483.1	12683	12877.7
		ENSMUSG00000024743	2826.12	2605.25	2263.7	2447.47	2146.82	2802.17	2509.95	2600.67
		ENSMUSG00000024750	8861.01	8372.27	7134.16	6473.4	6847.01	7511.16	7937.14	8141.15
		ENSMUSG00000024764	1498.68	1248.6	1086.89	1017.52	986.637	1210.12	1306.52	1551.15
		ENSMUSG00000024782	9875.49	9836.95	7541.74	8172.28	8003.36	9319.14	8821.28	9071.65
		ENSMUSG00000024805	2510.8	2413.63	2141.52	2140.41	2086.42	2551.7	2395.14	2621.45
		ENSMUSG00000024807	1764.41	2339.22	1132.83	1250.33	1253.19	1448.11	1490.05	1656.95
		ENSMUSG00000024811	7839.45	7500.79	5937.8	6223.54	6306.23	7349.94	6890.42	7553.57
		ENSMUSG00000024843	823.154	773.624	547.353	564.955	487.086	713.978	608.422	664.102
		ENSMUSG00000024862	3168.61	3313.64	2535.42	3070.63	2596.51	3222.5	3466.16	3366.8
		ENSMUSG00000024908	6550.99	6196.13	5192.03	5497.02	5260.15	6682.99	6551.85	6712.81
		ENSMUSG00000024921	3616.21	3331.99	2821.8	3207.1	2922.52	3525.75	3535.72	3774.9
		ENSMUSG00000024924	33184.8	32932.5	23264.5	27622.6	22544	34517.6	31719.2	31667.2
		ENSMUSG00000024937	16917.8	18806.5	12825.7	13723.5	13345	16722.8	16123.2	17360.2
		ENSMUSG00000024998	2046.67	1997.77	1609.8	1682.82	1607	1890.51	1992.04	2265.31
		ENSMUSG00000025006	19605.7	19132.7	12526.6	14026.5	11650.8	21475	19270.9	18837.6
		ENSMUSG00000025019	720.408	568.751	435.928	439.521	400.791	653.52	509.533	574.358
		ENSMUSG00000025060	13052.4	11491.2	8218.11	8501.42	8566.19	11213.5	10085.1	11197.2
		ENSMUSG00000025068	7624.51	7667.95	6276.97	6266.68	5836.4	7030.38	7009.43	6958.43
		ENSMUSG00000025075	193.683	194.68	95.7868	108.375	93.0066	149.705	136.602	152.092
		ENSMUSG00000025078	1432.55	1443.28	877.72	968.351	1030.74	1354.06	1274.67	1390.55
		ENSMUSG00000025085	30461.4	32010.1	23035.7	25698.9	21891.1	30512	30394.3	28374.1
		ENSMUSG00000025092	3135.55	2685.77	2241.22	2438.44	2115.18	2975.87	2776.45	2936.03
		ENSMUSG00000025209	2323.02	2265.83	1692.88	1787.18	1639.6	2289.72	2215.8	2209.58
		ENSMUSG00000025220	8472.47	8321.3	6806.73	7027.32	6471.15	8327.82	8589.14	8468.01
		ENSMUSG00000025221	11430.9	12210.8	9992.13	10141.1	9728.3	11333.4	11021.2	12147.5
		ENSMUSG00000025224	3244.2	3135.27	2283.24	2626.09	2440.22	3250.33	3217.26	3329.96
		ENSMUSG00000025234	5743.18	5583.55	4132.52	4615.97	4563.08	5521.81	5227.74	5617
		ENSMUSG00000025239	4301.19	4210.6	3541.18	3695.79	3508.36	4130.32	4065.37	4200
		ENSMUSG00000025241	39601.2	38873.9	23693.5	29711.8	24784.8	41012.5	41313.2	43861.9
		ENSMUSG00000025261	17561.4	15489.8	11334.1	12677.9	10662.2	16408.1	14256	17102.3
		ENSMUSG00000025262	1073.53	996.844	699.83	846.931	690.358	1131.42	1008.17	1112.82
		ENSMUSG00000025265	531.448	544.289	429.086	398.379	415.174	501.896	569.034	563.967
		ENSMUSG00000025266	2301.76	2295.39	1882.5	1929.68	1929.17	2326.19	2256.86	2340.89
		ENSMUSG00000025332	2646.61	2664.37	2090.69	2325.05	2329	2735.96	2556.88	2722.53
		ENSMUSG00000025417	2475.37	2621.56	2212.87	2289.92	2076.83	2563.22	2709.41	2754.65
		ENSMUSG00000025429	1175.09	1203.76	848.397	822.847	832.265	1095.92	1117.95	1079.76
		ENSMUSG00000025453	32306.2	32114.1	23395.4	26830.8	21534.4	33799.8	33469.1	35924.8
		ENSMUSG00000025537	1562.46	1557.44	1297.03	1290.47	1366.33	1522	1599.83	1611.6
		ENSMUSG00000025544	10175.5	10017.4	8178.04	8282.66	7857.62	9570.57	9588.1	9232.24
		ENSMUSG00000025574	294.068	269.087	185.709	221.767	244.502	279.257	262.309	290.013
		ENSMUSG00000025579	7926.85	9070.46	5927.05	7121.64	5613.95	8237.62	8892.52	9398.51
		ENSMUSG00000025583	2369.08	2334.12	1780.85	2082.21	1825.61	2426.95	2511.63	2425.91
		ENSMUSG00000025586	1162.1	1135.46	705.694	745.58	614.61	1068.09	836.371	984.345
		ENSMUSG00000025612	2635.98	2461.53	2098.51	2037.05	1976.15	2737.87	2441.23	2588.39
		ENSMUSG00000025651	35694.4	38882	30038	34660.9	32089.2	37565.4	40087.1	38963.8
		ENSMUSG00000025757	4650.76	5084.11	3270.43	3878.42	3700.13	4699.39	4347.79	4505.12
		ENSMUSG00000025759	1326.26	1409.65	1044.86	1056.66	1015.4	1219.71	1206.79	1193.12
		ENSMUSG00000025790	5737.28	6514.14	4261.53	5084.59	5157.55	5791.47	6459.67	6211.2
		ENSMUSG00000025791	13675.9	13977.2	10777	12727	10965.2	14092.4	13917.4	14336.3
		ENSMUSG00000025795	10768.3	10467.9	9169.14	9420.6	9459.82	9755.78	10715.3	10319.6
		ENSMUSG00000025812	2072.65	2214.87	1665.52	1843.38	1669.32	2084.35	2295.41	2244.53
		ENSMUSG00000025813	7140.3	6806.67	4817.68	5522.11	5636.97	6776.07	6530.06	7034.95
		ENSMUSG00000025815	511.371	484.152	402.695	380.316	308.743	592.103	444.165	475.168
		ENSMUSG00000025816	994.399	937.726	750.656	784.715	778.571	908.786	903.415	946.558
		ENSMUSG00000025885	2997.37	2981.36	1924.53	2446.47	1754.66	3059.36	2833.44	2798.11
		ENSMUSG00000025938	1439.63	1407.61	815.165	1007.49	941.572	1442.35	1314.06	1407.56
		ENSMUSG00000026003	55934.3	59295.9	45621.9	49986	46005.7	55765.1	57038.3	55270.7
		ENSMUSG00000026004	1737.25	1749.06	1491.54	1470.09	1353.87	1914.5	1593.97	1766.53
		ENSMUSG00000026014	5547.14	5921.95	3760.12	4191.5	3909.15	5816.42	4976.32	5152.22
		ENSMUSG00000026017	633.014	555.501	449.611	414.434	379.697	634.327	524.617	524.291
		ENSMUSG00000026028	18388.1	18005.4	11503.2	13250.9	12632.6	15623.1	15747.7	16277.6
		ENSMUSG00000026112	12506.8	13267.8	9452.59	11398.4	9566.25	12760.4	12882.5	12695.4
		ENSMUSG00000026113	1439.63	1366.84	1036.06	1156	1041.29	1348.31	1362.66	1284.75
		ENSMUSG00000026114	205.493	226.277	161.274	166.576	111.224	208.244	232.977	216.329
		ENSMUSG00000026116	3107.2	3161.77	2263.7	2451.48	2218.73	3047.84	2915.57	3117.41
		ENSMUSG00000026123	7507.59	7818.8	5509.69	6594.82	5845.03	7273.17	7389.9	7128.47
		ENSMUSG00000026131	44142.1	36853.7	25634.7	29380.7	24597.8	41105.5	32196.1	38662.4
		ENSMUSG00000026135	1136.12	996.844	704.717	828.868	693.235	961.567	927.718	1031.58
		ENSMUSG00000026207	13197.6	13395.2	7807.6	9432.64	8068.56	12670.2	11267.5	13453
		ENSMUSG00000026211	5566.04	5945.39	3260.66	3874.41	3731.77	5209.93	5019.9	5340.21
		ENSMUSG00000026219	11211.2	10667.7	7805.65	8409.1	7935.28	10568.6	9831.97	10694.6
		ENSMUSG00000026229	9150.36	9378.28	7432.27	8446.23	7662.02	9517.79	9295.62	9335.21
		ENSMUSG00000026235	4590.53	4630.53	2499.25	3291.39	2723.08	4394.23	4833.86	4818.75
		ENSMUSG00000026254	3746.12	3401.3	2854.06	2907.06	2886.08	3338.61	3214.75	3447.1
		ENSMUSG00000026305	4923.57	4663.15	3369.15	3170.97	3726.98	4113.05	3932.95	4366.26
		ENSMUSG00000026308	3939.8	4243.21	3087.66	3660.67	3077.85	4125.53	4446.68	4385.15
		ENSMUSG00000026313	1801.02	1884.63	1307.78	1528.29	1278.12	1838.69	1886.44	1801.48
		ENSMUSG00000026319	1429.01	1328.11	1189.52	1158.01	1097.86	1420.28	1365.18	1317.81
		ENSMUSG00000026339	1673.47	1507.5	1325.38	1284.44	1363.46	1573.82	1434.74	1490.69
		ENSMUSG00000026349	3644.55	3337.08	2308.66	2219.68	2226.4	3132.29	2701.03	3051.28
		ENSMUSG00000026361	3116.65	2799.93	2105.35	2159.47	2002.04	2737.87	2371.67	2548.72
		ENSMUSG00000026374	3104.84	2764.25	2455.27	2521.73	2329	2773.38	2835.11	2723.48
		ENSMUSG00000026384	3985.86	3421.68	2550.08	2798.68	2668.43	3720.55	3099.94	3331.85
		ENSMUSG00000026389	2064.38	2156.77	1560.93	1821.3	1642.48	1961.52	2338.15	2282.32
		ENSMUSG00000026455	2129.34	2239.33	1716.34	1925.66	1854.38	2141.93	2209.93	2052.76
		ENSMUSG00000026466	7119.05	7094.1	5874.27	6075.02	5757.78	7237.66	7369.79	7281.5
		ENSMUSG00000026469	3206.4	3002.76	2515.87	2842.84	2339.55	3423.06	3304.42	3277.05
		ENSMUSG00000026494	369.652	251.759	137.816	188.653	163.96	220.719	246.386	259.784
		ENSMUSG00000026496	3246.56	3409.45	2679.1	3043.53	2847.73	3540.14	3619.53	3537.78
		ENSMUSG00000026499	1809.29	1739.89	1466.12	1427.94	1483.31	1648.67	1593.13	1775.98
		ENSMUSG00000026516	1681.74	1629.81	1436.8	1372.75	1470.85	1717.77	1633.35	1699.46
		ENSMUSG00000026554	10532.1	10542.3	8964.86	9397.52	8860.55	10849.8	10692.6	11157.5
		ENSMUSG00000026564	1934.47	2145.56	1590.26	1585.49	1431.53	1950.96	2038.13	1946.02
		ENSMUSG00000026571	5182.21	5304.27	4392.51	4787.57	4428.84	5501.66	5593.96	5421.45
		ENSMUSG00000026576	13615.7	13409.5	10276.6	11563	10437.8	12825.7	13627.5	12389.3
		ENSMUSG00000026585	1966.36	1915.2	1461.24	1644.69	1521.66	1858.84	1925.83	1961.13
		ENSMUSG00000026596	2313.57	2071.15	1679.2	1844.38	1697.13	2275.32	2147.91	2304.99
		ENSMUSG00000026610	3259.55	2984.42	2122.95	2406.33	1829.45	3283.91	3139.32	3003.1
		ENSMUSG00000026618	8095.73	8444.63	6386.44	7488.91	6582.37	8126.3	8206.16	8658.83
		ENSMUSG00000026623	10060.9	9082.7	5933.89	6471.39	5687.78	8564.86	8188.56	8678.67
		ENSMUSG00000026640	4911.76	4348.2	3379.9	3248.24	3188.11	4021.88	3701.65	4005.39
		ENSMUSG00000026663	10174.3	10201.9	6262.31	7201.92	6751.13	9975.54	9540.33	10495.3
		ENSMUSG00000026672	7270.21	6521.28	5678.79	6033.88	4883.32	6889.31	6376.7	6990.55
		ENSMUSG00000026740	1998.25	1978.4	1686.04	1708.91	1671.24	2027.74	1916.61	1977.19
		ENSMUSG00000026764	106.29	86.6378	49.8482	51.1771	65.2005	91.1665	82.1286	91.6328
		ENSMUSG00000026792	1034.55	1087.56	845.465	936.24	834.183	1120.87	1125.5	1187.45
		ENSMUSG00000026812	3008	3159.73	2417.15	2598.99	2233.12	3151.48	3123.4	3209.04
		ENSMUSG00000026824	3642.19	3585.78	2802.25	3174.99	2519.81	3927.84	3905.3	3786.23
		ENSMUSG00000026854	2765.89	2845.8	1907.92	2193.59	1968.48	2561.3	2664.15	2659.24
		ENSMUSG00000026858	5541.23	5713	4281.08	4466.46	4381.86	5216.64	5537.81	5463.02
		ENSMUSG00000026867	3322.14	2842.74	2510	2468.54	2462.28	3019.05	2819.19	3058.84
		ENSMUSG00000026878	8380.35	8045.08	7222.13	7094.55	6750.17	8335.5	8091.34	8328.2
		ENSMUSG00000026880	7583.18	8243.84	6347.34	7229.01	5897.77	7738.6	8258.12	7719.83
		ENSMUSG00000026924	3296.16	3266.75	2680.08	2836.82	2723.08	3217.7	3294.36	3444.26
		ENSMUSG00000026926	11629.3	12176.2	8485.93	9636.34	8599.75	11567.6	11782.1	11783.8
		ENSMUSG00000026932	2380.89	2354.51	1525.75	1825.32	1594.54	2234.06	2273.62	2304.99
		ENSMUSG00000026933	1784.49	1855.07	1365.45	1647.7	1494.82	1856.92	1771.63	1958.3
		ENSMUSG00000026944	5019.23	4743.67	2871.65	4011.88	3131.54	4782.88	4754.24	4975.57
		ENSMUSG00000026971	1146.75	1087.56	781.933	891.083	768.982	1125.67	1008.17	1206.34
		ENSMUSG00000027010	15027	15244.2	11690.9	13001	11993.1	15084.7	15117.5	15099.6
		ENSMUSG00000027086	2063.2	1891.76	1327.33	1374.76	1332.77	1791.66	1726.38	1925.23
		ENSMUSG00000027087	1553.01	1310.78	1139.67	1090.77	1160.19	1427	1387.81	1309.31
		ENSMUSG00000027177	18280.6	16401	10990.1	11818.9	10337.2	16266	15082.3	16495.8
		ENSMUSG00000027185	1257.76	1211.91	961.777	909.146	1014.44	1218.75	1242.82	1218.62
		ENSMUSG00000027187	13031.1	14335	10174.9	12295.5	10085.9	14119.3	14660	13685.4
		ENSMUSG00000027194	2385.61	2392.22	1616.65	1776.15	1652.07	2376.09	2183.95	2357.89
		ENSMUSG00000027236	4405.12	4227.92	3342.76	3518.17	3526.58	4096.74	3856.69	4116.87
		ENSMUSG00000027288	61838.1	59236.8	43045.4	54099.2	44911.6	67444	60054.5	63884.1
		ENSMUSG00000027293	23328.2	23521.6	18046	16499.1	16506.3	22085.3	21340	22354.6
		ENSMUSG00000027309	5022.78	4839.48	4107.1	4258.74	3895.73	5035.27	4958.72	5419.56
		ENSMUSG00000027312	3430.79	3205.6	2733.83	2966.26	2678.01	3231.13	3425.94	3415.92
		ENSMUSG00000027332	30022.1	33220	21702.5	26699.4	22781.8	30773	32573.2	31692.7
		ENSMUSG00000027371	1668.75	1648.16	1164.1	1499.19	1211	1555.59	1618.27	1500.13
		ENSMUSG00000027452	29240.3	29654.6	23091.5	25668.8	22030.1	32675	31962.3	32089.4
		ENSMUSG00000027536	2801.32	2516.57	1786.72	1974.83	1848.63	2644.79	2428.66	2762.21
		ENSMUSG00000027630	2129.34	2140.46	1495.45	1764.1	1618.51	2237.9	1966.06	2091.5
		ENSMUSG00000027650	1938.01	2064.02	1294.1	1665.76	1382.63	1680.34	1899.01	1909.17
		ENSMUSG00000027651	2116.35	2114.98	1627.4	1827.32	1723.98	1904.9	2033.94	2031.04
		ENSMUSG00000027652	3655.18	3476.72	2705.49	2930.14	2826.63	3497.92	3382.36	3703.1
		ENSMUSG00000027655	1196.35	1116.1	921.703	1017.52	946.366	1205.32	1112.93	1090.15
		ENSMUSG00000027663	781.82	729.796	515.098	529.833	547.492	716.857	721.559	692.442
		ENSMUSG00000027668	25118.6	23960.9	18459.5	19378.1	18013.6	23570.9	22277.8	22978.1
		ENSMUSG00000027692	2248.62	2268.89	1680.18	1792.2	1587.82	2447.1	2068.3	2219.97
		ENSMUSG00000027698	12548.1	12411.6	9720.4	9827	7946.79	11789.3	11283.5	10692.7
		ENSMUSG00000027710	5479.82	5114.69	4074.85	4175.45	4258.17	5101.49	4834.69	5079.48
		ENSMUSG00000027765	2644.25	2421.78	1309.74	1771.13	1500.57	2314.67	1893.99	2079.22
		ENSMUSG00000027782	6164.8	6023.87	4324.09	4984.25	4641.7	5673.44	5761.57	5655.73
		ENSMUSG00000027784	4728.71	4532.68	2571.58	3034.5	2418.17	4076.58	4105.59	4136.7
		ENSMUSG00000027799	1535.3	1321.99	1077.11	1234.27	1030.74	1513.36	1331.66	1566.26
		ENSMUSG00000027805	2261.61	2228.12	1601.01	2029.02	1855.34	2156.33	2097.63	2140.62
		ENSMUSG00000027809	44903.8	48376.5	36209.4	41502.6	37212.2	46623.5	46070	44675.3
		ENSMUSG00000027840	86.2127	85.6185	49.8482	56.1945	38.3532	92.1262	58.6633	95.4115
		ENSMUSG00000027878	1641.58	1465.71	1237.41	1189.11	1186.07	1457.7	1326.63	1555.87
		ENSMUSG00000027894	240.923	273.164	162.251	182.632	120.813	219.759	270.689	243.724
		ENSMUSG00000027983	706.236	610.541	415.402	477.653	454.486	564.273	532.998	577.192
		ENSMUSG00000028030	1060.53	958.112	643.14	719.49	693.235	842.571	920.176	800.134
		ENSMUSG00000028053	5367.63	4711.06	3917.48	4340.02	3804.64	5592.83	5014.04	5576.38
		ENSMUSG00000028080	2883.99	2687.81	1843.41	2370.2	1874.51	2830	2739.58	2807.55
		ENSMUSG00000028106	1932.11	1795.95	1457.33	1532.3	1327.98	1750.4	1660.17	1909.17
		ENSMUSG00000028127	8700.4	8672.95	6332.68	7467.84	6888.24	8865.23	8429.08	7835.08
		ENSMUSG00000028136	2679.68	2742.85	1924.53	2098.26	1983.82	2643.83	2442.91	2655.46
		ENSMUSG00000028164	1926.2	1705.24	1494.47	1402.85	1449.75	1711.05	1692.86	1790.15
		ENSMUSG00000028278	10017.2	10250.8	6873.19	6797.52	6429.92	8968.87	8056.15	9178.4
		ENSMUSG00000028328	22088.2	22639	16107.8	18212	17445	20756.2	22227.5	21001.9
		ENSMUSG00000028383	17657.1	18647.5	13988.8	16607.5	14394	19286	18773.9	17939.3
		ENSMUSG00000028399	723.951	723.68	530.737	638.208	534.069	841.611	770.165	834.142
		ENSMUSG00000028402	4545.65	4504.14	3170.74	3613.5	3135.38	4161.03	4465.11	4606.2
		ENSMUSG00000028403	1416.01	1231.28	876.742	981.396	996.225	1329.11	1138.07	1175.17
		ENSMUSG00000028413	4683.83	5360.33	4059.21	3788.11	4787.44	4895.16	5133.88	5232.52
		ENSMUSG00000028414	3362.3	3231.08	2149.34	2332.07	2159.29	2930.76	2606.33	3144.8
		ENSMUSG00000028431	1949.82	1786.78	1357.63	1517.25	1439.2	1948.08	1745.65	1853.44
		ENSMUSG00000028452	27211.3	28079.8	21598	24601.1	22593.9	27063	27934.6	28631
		ENSMUSG00000028454	1382.95	1412.71	1064.41	1292.47	1078.68	1345.43	1456.53	1463.29
		ENSMUSG00000028514	8831.49	7817.78	5299.55	5772.98	4950.44	8066.8	7101.61	7885.15
		ENSMUSG00000028518	11739.1	10542.3	6921.08	7983.63	6738.66	11265.3	10528.4	11390.8
		ENSMUSG00000028521	689.702	620.734	493.595	567.965	534.069	668.874	613.45	670.715
		ENSMUSG00000028527	3721.32	3448.18	2473.84	2793.67	2356.81	3343.41	3386.55	3306.34
		ENSMUSG00000028577	4005.94	3934.37	3336.9	3470.01	3458.5	3995.01	3812.28	3991.22
		ENSMUSG00000028580	1865.97	1908.07	1289.21	1532.3	1352.91	1790.7	1889.8	1923.34
		ENSMUSG00000028649	26716.5	22444.3	15608.4	18005.3	15729.6	24564.1	19658.1	24124
		ENSMUSG00000028690	3907.92	3844.68	2928.34	3186.02	3023.19	3604.44	3623.72	3441.43
		ENSMUSG00000028712	81.4887	59.1175	34.2096	30.1042	19.1766	58.5385	46.9306	49.1228
		ENSMUSG00000028737	9567.25	10487.2	6320.95	8033.8	6897.83	10176.1	10261	10143.8
		ENSMUSG00000028809	5302.67	4559.19	3751.32	3609.49	3353.99	4638.94	4003.35	4348.31
		ENSMUSG00000028811	1747.87	1797.99	1530.63	1550.36	1550.43	1764.79	1762.41	1822.27
		ENSMUSG00000028820	5769.17	5283.88	4264.47	3679.73	4095.17	4734.9	4395.56	5017.13
		ENSMUSG00000028826	1776.22	1787.8	1460.26	1448.01	1422.9	1740.8	1652.63	1701.35
		ENSMUSG00000028830	3045.79	3208.66	2285.2	2735.47	2336.67	3292.55	3406.66	3442.37
		ENSMUSG00000028838	1645.13	1624.71	1184.63	1581.47	1195.66	1749.44	1950.14	1865.72
		ENSMUSG00000028842	1906.13	1570.69	1102.53	1222.23	1122.79	1706.25	1255.39	1508.64
		ENSMUSG00000028849	13996	15417.4	11778.8	12680.9	11974.8	13713.4	15300.2	14717.9
		ENSMUSG00000028890	1313.27	1359.7	1006.74	1096.8	1118	1292.65	1274.67	1241.29
		ENSMUSG00000028919	3136.73	3576.61	2343.84	2617.06	2521.72	3223.46	3223.13	3380.02
		ENSMUSG00000028944	1421.92	1427.99	1179.74	1163.02	1047.04	1250.42	1316.57	1464.24
		ENSMUSG00000028977	2330.11	2237.29	1559.96	1683.83	1380.72	2407.76	2126.96	2646.96
		ENSMUSG00000028989	88.5747	67.2717	41.0515	55.191	46.9827	71.0139	82.9667	79.3522
		ENSMUSG00000028991	3963.42	3535.84	2736.77	3428.86	2692.4	3827.08	3753.61	4197.16
		ENSMUSG00000029004	3527.64	3324.85	2988.94	2730.45	2750.89	3447.05	3172.85	3568.96
		ENSMUSG00000029020	52073.7	53800	42508.8	48065.3	42101.3	55291.1	58411.9	58145.3
		ENSMUSG00000029095	1152.65	1099.79	924.636	1052.64	860.071	1189.96	1107.9	1146.83
		ENSMUSG00000029104	2371.44	2250.54	1799.42	1926.67	1696.17	2383.76	2049.86	2322.94
		ENSMUSG00000029108	7544.2	7650.62	4983.84	5929.52	5032.9	8540.86	7016.13	7786.9
		ENSMUSG00000029156	10043.2	10403.7	7990.38	8222.45	7576.68	10161.7	9714.64	9646.01
		ENSMUSG00000029190	11463.9	10173.3	7342.35	8382	7451.07	10603.1	9960.19	10548.2
		ENSMUSG00000029191	2526.15	2534.92	2253.92	2202.62	2127.65	2668.78	2383.41	2568.55
		ENSMUSG00000029227	1980.53	1845.89	1609.8	1607.56	1588.78	1794.54	1863.82	1808.1
		ENSMUSG00000029245	79.1267	70.3295	40.0741	35.1215	35.4767	72.9332	60.3394	51.9568
		ENSMUSG00000029249	1091.24	1080.42	887.494	865.997	744.053	999.953	1047.56	1018.35
		ENSMUSG00000029263	1407.75	1386.2	975.461	1127.9	989.513	1275.37	1381.94	1354.65
		ENSMUSG00000029291	1359.33	1225.16	930.5	1053.65	929.107	1229.31	1092.81	1245.07
		ENSMUSG00000029313	4579.9	4245.25	3332.01	3340.56	3159.35	4350.08	4098.05	4373.81
		ENSMUSG00000029330	301.154	215.066	170.07	167.58	160.125	210.163	250.576	256.005
		ENSMUSG00000029338	9109.02	8678.05	7550.54	7280.19	7054.12	8867.14	8493.61	9661.12
		ENSMUSG00000029381	2217.91	2441.15	1567.78	1711.92	1707.68	2113.14	2191.49	2213.36
		ENSMUSG00000029407	3535.9	3605.15	2949.84	3044.54	3023.19	3605.4	3470.35	3540.62
		ENSMUSG00000029432	47548.1	47821	38217.9	40575.4	36498.9	46722.4	46463	46267
		ENSMUSG00000029434	2278.14	2128.23	1762.28	1875.49	1707.68	2079.56	2135.34	2086.77
		ENSMUSG00000029456	405.082	405.669	281.496	339.174	269.431	422.245	331.029	374.089
		ENSMUSG00000029467	802492	852177	590783	706799	615821	872172	916595	934919
		ENSMUSG00000029478	3959.88	4079.11	2927.36	3452.95	2989.63	3607.32	3824.85	4014.84
		ENSMUSG00000029480	916.453	1060.04	758.475	868.004	715.288	913.585	965.43	955.06
		ENSMUSG00000029501	2090.36	1991.65	1653.79	1658.74	1512.08	1925.05	1903.2	1962.08
		ENSMUSG00000029502	5314.48	4961.8	3844.18	4062.06	3844.91	4861.58	4897.55	4866.93
		ENSMUSG00000029512	5407.78	5542.78	4315.29	4858.81	4541.02	5199.37	6026.4	6059.1
		ENSMUSG00000029545	13625.2	16062.6	10502.3	13637.2	11338.2	14689.3	15959.8	14760.4
		ENSMUSG00000029547	2377.35	2386.11	1762.28	2045.08	1890.81	2348.26	2395.98	2409.85
		ENSMUSG00000029575	2613.54	2789.74	1963.63	2458.51	1828.49	2749.39	2870.31	2953.98
		ENSMUSG00000029577	9091.31	9484.29	6889.81	8289.68	6743.46	9560.97	9902.36	9942.64
		ENSMUSG00000029624	1712.44	1661.41	1234.48	1403.86	1140.05	1727.37	1488.37	1800.54
		ENSMUSG00000029673	1733.7	1484.05	949.071	1123.89	1095.94	1373.26	1623.3	1855.33
		ENSMUSG00000029683	43548.1	41422	26111.7	27971.8	24409.9	34662.5	31943	36827.9
		ENSMUSG00000029685	5022.78	5082.07	3795.31	4182.47	3120.99	5475.75	5468.26	5608.5
		ENSMUSG00000029705	4772.41	4607.09	3805.08	4347.04	3889.98	4660.05	4698.93	4539.13
		ENSMUSG00000029723	7769.77	8296.84	6694.32	7133.68	6709.9	7844.16	8927.72	8261.13
		ENSMUSG00000029765	1297.91	1353.59	948.094	1143.96	1046.08	1268.65	1210.98	1478.41
		ENSMUSG00000029775	3916.18	3632.67	2926.38	3112.77	3057.71	4014.21	3868.43	4164.1
		ENSMUSG00000029776	18035	17986	14587.9	15678.3	14661.5	18972.2	17967.7	18280.3
		ENSMUSG00000029804	3917.36	3479.78	2711.35	2768.58	2470.91	3591	3381.52	3401.75
		ENSMUSG00000029822	1852.98	1707.27	1277.48	1358.7	1243.6	1664.99	1651.79	1528.47
		ENSMUSG00000029823	9210.59	7646.55	6262.31	6368.04	5601.49	8697.29	6940.71	7238.05
		ENSMUSG00000029992	2079.73	1777.6	1381.09	1540.33	1447.83	1902.02	1775.82	1833.6
		ENSMUSG00000029998	6202.59	5995.33	4992.64	5424.77	4751.01	6067.85	5909.91	6332.11
		ENSMUSG00000030002	4276.39	3910.93	3123.82	3097.72	3238.93	4009.41	3454.43	3534.95
		ENSMUSG00000030029	2550.95	2592	2111.22	2319.02	2151.62	2771.46	2638.17	2793.38
		ENSMUSG00000030087	4031.92	4016.93	2885.33	3276.34	2808.42	4043.96	3698.3	4255.73
		ENSMUSG00000030098	1503.41	1644.08	1137.71	1109.84	1118	1600.69	1369.37	1273.41
		ENSMUSG00000030105	6034.89	5690.57	4875.35	4794.59	4547.73	5451.76	5629.16	5427.12
		ENSMUSG00000030126	2996.19	2849.87	2094.6	2392.28	2204.35	2792.57	2536.77	2765.04
		ENSMUSG00000030168	6961.97	7406	5032.72	5934.54	5456.71	6835.57	6354.91	6556.94
		ENSMUSG00000030172	3383.55	3178.08	2219.71	2880.97	2636.78	3472.01	3397.44	3654.92
		ENSMUSG00000030180	2911.16	2673.54	2312.57	2383.25	2205.31	2943.24	2574.48	2971.93
		ENSMUSG00000030201	4820.83	4754.88	4117.85	4384.17	3953.26	5224.32	4736.64	4968.96
		ENSMUSG00000030213	4277.57	4423.62	3159.99	3632.57	3151.68	4103.45	4087.99	4340.75
		ENSMUSG00000030216	2597.01	2637.87	2280.31	2336.08	2267.63	2611.2	2776.45	2656.41
		ENSMUSG00000030231	2147.05	2014.07	1594.17	1722.96	1641.52	2128.5	1882.25	1998.92
		ENSMUSG00000030249	23843.1	25211.6	16483.1	18746.9	14902.1	20828.2	20288.3	22792
		ENSMUSG00000030255	15252.6	15209.5	11428.9	12270.5	12362.2	15750.7	15674.8	16635.6
		ENSMUSG00000030259	2633.62	2391.2	1958.74	2013.97	1933.96	2520.99	2426.15	3090.96
		ENSMUSG00000030275	4039.01	3890.55	3187.35	3260.28	3139.21	3853.95	3793.84	3768.28
		ENSMUSG00000030279	1400.66	1349.51	1028.24	1020.53	979.925	1383.81	1319.92	1306.48
		ENSMUSG00000030306	8784.25	9423.13	6751.99	7357.46	7301.5	9718.35	9643.41	8971.52
		ENSMUSG00000030319	7011.57	7204.19	4411.08	5656.57	4611.02	6856.68	7171.17	7642.37
		ENSMUSG00000030451	5822.31	4920.01	4249.81	4376.14	3884.22	5450.8	4810.39	5479.08
		ENSMUSG00000030557	12557.5	10676.8	9268.84	9920.33	8440.59	11603.1	11334.6	12017.1
		ENSMUSG00000030655	9692.44	8116.43	6734.4	6411.18	6037.76	10078.2	7363.08	8323.47
		ENSMUSG00000030691	1368.77	1236.37	1093.73	1148.98	1086.36	1468.26	1343.39	1400.94
		ENSMUSG00000030733	3459.14	3732.56	3071.04	3116.79	3038.53	3513.27	3767.86	4156.54
		ENSMUSG00000030739	5124.34	5698.73	3818.76	4331.99	3516.99	5674.4	5718.83	6001.48
		ENSMUSG00000030747	18826.3	20181.5	13322.2	16495.1	13892.5	16946.4	18492.3	16659.2
		ENSMUSG00000030816	2809.59	2731.64	2357.53	2303.97	2411.46	2707.17	2696	2885.02
		ENSMUSG00000030847	10689.2	11433.1	6726.58	8679.03	7020.56	9360.4	9076.89	9460.85
		ENSMUSG00000030852	24103	27528.4	14540	16118.8	12432.2	22509.5	17361.8	20648.6
		ENSMUSG00000030872	2493.08	2306.6	2019.34	2109.3	1819.86	2399.12	2315.52	2462.75
		ENSMUSG00000031010	12574.1	11742	8582.69	9396.51	8475.1	12488.9	11025.3	12548
		ENSMUSG00000031066	394.453	403.63	317.66	320.108	250.255	378.101	400.586	460.054
		ENSMUSG00000031119	986.132	939.765	761.407	791.74	761.312	881.916	982.191	988.123
		ENSMUSG00000031133	4912.94	4890.45	3593.96	3717.86	4012.71	4493.07	4474.33	4610.93
		ENSMUSG00000031137	2924.15	2829.49	2326.25	2351.14	1960.81	3150.52	2997.69	2910.52
		ENSMUSG00000031161	979.046	896.956	756.52	860.979	739.258	991.316	978.001	1021.19
		ENSMUSG00000031166	3720.14	3348.29	3007.51	3198.07	2917.72	3790.61	3495.49	3750.33
		ENSMUSG00000031292	686.159	571.809	447.657	504.747	473.662	661.197	590.823	662.213
		ENSMUSG00000031295	1210.52	996.844	869.9	879.042	814.047	1253.3	1097.84	1105.26
		ENSMUSG00000031353	10353.8	10466.9	9070.42	9033.26	8625.64	10464	9793.42	10304.4
		ENSMUSG00000031386	3983.5	4051.59	3170.74	3507.14	3369.33	4256.04	4285.77	4182.99
		ENSMUSG00000031393	3475.67	3099.59	2755.34	2845.85	2441.18	3422.1	3047.98	3509.44
		ENSMUSG00000031438	4545.65	4672.32	3773.8	4158.39	3800.8	4767.53	4571.55	4400.27
		ENSMUSG00000031441	9091.31	8648.49	6879.05	7618.36	6483.61	8972.71	8957.88	9394.73
		ENSMUSG00000031446	7580.81	7345.86	5757.96	6260.66	5767.37	7527.48	7196.31	7498.78
		ENSMUSG00000031461	91047.7	93083.6	69946.8	62038.7	57864.5	99560.6	80195.2	98220
		ENSMUSG00000031508	2527.33	2565.5	2064.3	1888.53	2034.64	2356.89	2276.14	2420.24
		ENSMUSG00000031511	7095.43	7283.69	5540.97	6034.88	6258.29	6664.75	7131.78	7162.48
		ENSMUSG00000031529	4330.71	4129.05	3248.93	3416.82	3136.34	4374.07	4054.47	4398.38
		ENSMUSG00000031543	22015	22510.5	18496.6	18228.1	18033.7	20867.5	20621.8	20621.2
		ENSMUSG00000031586	7150.93	7475.31	6367.87	6173.36	5969.68	6867.24	7719.25	7429.82
		ENSMUSG00000031592	4572.82	4313.54	3243.07	3390.73	3206.33	4452.77	3979.89	4301.08
		ENSMUSG00000031626	22894.8	22285.3	13045.6	15227.7	14043	21065.2	20057	21910.6
		ENSMUSG00000031644	1480.97	1382.13	1111.32	1174.06	1159.23	1454.83	1243.66	1411.33
		ENSMUSG00000031647	1059.35	887.782	730.13	830.875	713.37	962.527	951.183	1008.91
		ENSMUSG00000031657	2141.15	2256.66	1747.62	1795.21	1832.33	2188	2059.92	2103.78
		ENSMUSG00000031660	5048.76	5240.06	4049.44	4294.86	4386.65	4832.79	4813.74	4796.08
		ENSMUSG00000031666	3336.31	3430.86	2854.06	3068.62	2585.01	3661.06	3550.81	3689.88
		ENSMUSG00000031672	54782.9	57467.3	41564.6	47609.7	42832.9	53438	58020.5	55057.2
		ENSMUSG00000031698	48542.5	50722.8	39782.8	39882	36727.1	49983.3	46070.8	49292.8
		ENSMUSG00000031700	2550.95	2465.61	1737.85	2325.05	1988.61	2711.96	2794.89	2539.27
		ENSMUSG00000031701	16317.8	15902.6	13311.4	13739.5	12958.6	15612.5	15168.7	15153.4
		ENSMUSG00000031748	1394.76	1531.96	1011.63	1205.17	1209.09	1352.14	1513.51	1402.83
		ENSMUSG00000031751	8773.62	8835.01	7676.63	8219.44	7964.05	8805.73	8953.69	8973.41
		ENSMUSG00000031770	12333.1	13744.8	9036.21	11308.1	8775.22	14346.7	11432.6	11593.9
		ENSMUSG00000031826	1980.53	2029.36	1457.33	1777.15	1612.75	1866.51	1997.07	2166.12
		ENSMUSG00000031858	3426.07	3413.53	3041.72	2945.19	3057.71	3431.7	3348	3313.9
		ENSMUSG00000031965	6177.79	5194.19	4050.41	3902.5	3566.85	5351.96	5071.86	5615.11
		ENSMUSG00000031967	4125.22	4341.06	3331.03	3971.74	3489.19	4176.39	4495.28	4600.54
		ENSMUSG00000031974	3521.73	3580.69	2770.97	3238.21	2827.59	3441.3	3617.85	3671.93
		ENSMUSG00000031976	621.204	584.04	464.273	524.816	462.156	589.224	560.653	588.528
		ENSMUSG00000031983	4054.36	3972.09	3570.5	3255.26	3388.51	3888.49	4485.23	4132.92
		ENSMUSG00000031993	2784.79	2741.83	2050.62	2222.69	2115.18	2716.76	2749.63	2798.11
		ENSMUSG00000031996	19023.5	19448.7	15760.8	17848.8	15554.2	17395.5	19674	19176.8
		ENSMUSG00000032030	3880.75	3678.54	2772.93	3020.45	2833.34	3571.81	3449.4	3466.93
		ENSMUSG00000032034	5831.76	5628.4	4121.76	4536.7	3916.82	5806.83	5474.96	6484.2
		ENSMUSG00000032086	3778.01	3422.7	2650.75	2898.03	2784.44	3468.17	3505.55	3555.73
		ENSMUSG00000032097	10957.3	10466.9	8273.83	8626.85	7742.56	10414.1	9900.69	10141
		ENSMUSG00000032109	910.548	1011.11	742.836	868.004	784.324	994.195	1094.49	1031.58
		ENSMUSG00000032177	3834.69	3798.81	2499.25	3478.04	2722.12	3899.05	4360.36	4009.17
		ENSMUSG00000032185	2999.73	3105.71	2337.98	2815.74	2304.07	3207.14	3363.92	3399.86
		ENSMUSG00000032187	3789.82	3720.33	2957.66	3394.75	3059.63	3710.96	4003.35	3845.75
		ENSMUSG00000032194	6401	6011.64	5072.79	5544.18	4948.53	6312.56	6426.98	6887.58
		ENSMUSG00000032216	33886.3	33544.1	26604.3	28624	25462.7	35008.9	34794.9	37912.4
		ENSMUSG00000032217	1348.7	1234.33	1054.63	990.427	976.09	1212.04	1165.72	1335.76
[truncated: 698 more rows]

## Sheet: Figure 6d
	Figure 6d
	Row Data
		Down regulated in CD VEH – Up regulated in CD JZL184
		ID	Description	GeneRatio	BgRatio	pvalue	p.adjust	qvalue	geneID	Count
		GO:0055001	muscle cell development	50/1378	202/19650	1.95628e-15	5.35034e-12	4.06406e-12	Hdac9/Homer1/Cacna2d2/Prox1/Xk/Mypn/Sgcd/Myocd/Ldb3/Gata4/Ppara/Gsk3b/Cxadr/Vegfa/Myom1/Afg3l2/Speg/Obsl1/Hdac4/Tmod1/Mtor/Sgcb/Atp2a2/Lmod2/Mef2a/Myom2/Sorbs2/Mylk3/Ank2/Map2k4/Fhod3/Six4/Ripor2/Alpk3/Synpo2l/Myh6/Dicer1/Pgm5/Pbrm1/Dmd/Adra1a/Nrap/Actn2/Camk2d/Slc8a1/Naca/Akap6/Flnc/Myo18b/Xirp1	50
		GO:0016236	macroautophagy	49/1378	195/19650	1.96632e-15	5.35034e-12	4.06406e-12	Poldip2/Tsc2/Ulk2/Ubqln1/Ubqln4/Pip4k2b/Atp6v0a1/Vps13d/Hif1a/Pacs2/Retreg1/Rab12/Tbc1d5/Fyco1/Pip4k2c/Optn/Lrsam1/Tsc1/Vcp/Prkaa2/Plaa/Mtor/Mfn2/Htt/Vps33a/Ulk1/Bag3/Hdac6/Ulk3/Snx14/Trappc8/Mtmr3/Vps13c/Rubcn/Rab3gap1/Larp1/Tigar/Trp53inp2/Rab3gap2/Epg5/Atg2b/Hspb8/Wipi1/Wdfy3/Smcr8/Synpo2/Stx17/Tecpr1/Clec16a	49
		GO:0055002	striated muscle cell development	47/1378	188/19650	9.09092e-15	1.58199e-11	1.20166e-11	Hdac9/Homer1/Cacna2d2/Prox1/Xk/Mypn/Sgcd/Myocd/Ldb3/Gata4/Ppara/Gsk3b/Cxadr/Vegfa/Myom1/Afg3l2/Speg/Obsl1/Hdac4/Tmod1/Mtor/Sgcb/Lmod2/Mef2a/Myom2/Sorbs2/Mylk3/Map2k4/Fhod3/Six4/Ripor2/Alpk3/Synpo2l/Myh6/Dicer1/Pgm5/Dmd/Adra1a/Nrap/Actn2/Camk2d/Slc8a1/Naca/Akap6/Flnc/Myo18b/Xirp1	47
		GO:0006914	autophagy	72/1378	387/19650	1.75254e-14	1.58199e-11	1.20166e-11	Mid2/Hk2/Poldip2/Tsc2/Golga2/Ulk2/Ubqln1/Eif4g2/Ubqln4/Mapt/Pip4k2b/Atp6v0a1/Vps13d/Hif1a/Pacs2/Dapk1/Gata4/Retreg1/Gsk3b/Rab12/Tbc1d5/Fyco1/Pip4k2c/Mfsd8/Optn/Lrsam1/Tsc1/Rragd/Vcp/Prkaa2/Plaa/Mtor/Mfn2/Htt/Vps33a/Ulk1/Bag3/Hdac6/Usp10/Ulk3/Snx14/Kdm4a/Trappc8/Atm/Mtmr3/Vps13c/Rubcn/Rab3gap1/Larp1/Tigar/Trp53inp2/Rab3gap2/Epg5/Mul1/Atg2b/Hspb8/Wipi1/Wdr41/Wdfy3/Nhlrc1/Adra1a/Eif4g1/Vps13a/Cltc/F…	72
		GO:0061919	process utilizing autophagic mechanism	72/1378	387/19650	1.75254e-14	1.58199e-11	1.20166e-11	Mid2/Hk2/Poldip2/Tsc2/Golga2/Ulk2/Ubqln1/Eif4g2/Ubqln4/Mapt/Pip4k2b/Atp6v0a1/Vps13d/Hif1a/Pacs2/Dapk1/Gata4/Retreg1/Gsk3b/Rab12/Tbc1d5/Fyco1/Pip4k2c/Mfsd8/Optn/Lrsam1/Tsc1/Rragd/Vcp/Prkaa2/Plaa/Mtor/Mfn2/Htt/Vps33a/Ulk1/Bag3/Hdac6/Usp10/Ulk3/Snx14/Kdm4a/Trappc8/Atm/Mtmr3/Vps13c/Rubcn/Rab3gap1/Larp1/Tigar/Trp53inp2/Rab3gap2/Epg5/Mul1/Atg2b/Hspb8/Wipi1/Wdr41/Wdfy3/Nhlrc1/Adra1a/Eif4g1/Vps13a/Cltc/F…	72
		GO:0042692	muscle cell differentiation	72/1378	388/19650	2.00887e-14	1.58199e-11	1.20166e-11	Hdac9/Homer1/Cacna2d2/Prox1/Xk/Mypn/Frs2/Sgcd/Myocd/Spag9/Nln/Ldb3/Gata4/Rb1/Ppara/Gsk3b/Cxadr/Vegfa/Myom1/Cdh2/Afg3l2/Smarca2/Speg/Obsl1/Hdac4/Ccnt2/Tsc1/Tmod1/Mtor/Sgcb/Atp2a2/Lmod2/Mef2a/Hdac6/Mecp2/Myom2/Sorbs2/Mylk3/Smarca4/Rora/Neo1/Ank2/Map2k4/Fhod3/Six4/Ripor2/Rbm24/Alpk3/Synpo2l/Myh6/Dicer1/Pgm5/Pbrm1/Trim72/Dmd/Adra1a/Fbxo40/Nrap/Plpp7/Sox6/Actn2/Camk2d/Slc8a1/Smyd1/Ankrd17/Naca/Akap6/Q…	72
		GO:0014706	striated muscle tissue development	77/1378	431/19650	2.0349e-14	1.58199e-11	1.20166e-11	Mef2d/Crhr2/Hdac9/Apc/Usp19/Homer1/Rbfox1/Prox1/Xk/Jph2/Meis1/Frs2/Sgcd/Myocd/Nf1/Asb2/Ryr2/Nln/Gata4/Rb1/Ppara/Gsk3b/Cxadr/Vegfa/Myom1/Svil/Speg/Obsl1/Hdac4/Ccnt2/Tsc1/Mtor/Sgcb/Lrp6/Mef2a/Myh14/Hdac6/Myom2/Sorbs2/Mylk3/Tbx20/Arid2/Map2k4/Gpc1/Fhod3/Six4/Ripor2/Fgf1/Rbm24/Alpk3/Cited2/Ppp1r13l/Myh6/Chd7/Dicer1/Pgm5/Pkp2/Dsg2/Dmd/Adra1a/Lemd3/Nrap/Sox6/Actn2/Myh7/Yap1/Camk2d/Slc8a1/Dsp/Smyd1/Naca…	77
		GO:0010506	regulation of autophagy	54/1378	247/19650	4.06187e-14	2.76309e-11	2.09881e-11	Mid2/Hk2/Poldip2/Tsc2/Golga2/Ulk2/Ubqln1/Eif4g2/Ubqln4/Mapt/Pip4k2b/Atp6v0a1/Vps13d/Hif1a/Dapk1/Gata4/Gsk3b/Rab12/Fyco1/Pip4k2c/Mfsd8/Optn/Lrsam1/Tsc1/Rragd/Prkaa2/Mtor/Mfn2/Htt/Ulk1/Bag3/Hdac6/Usp10/Ulk3/Kdm4a/Atm/Mtmr3/Vps13c/Rubcn/Rab3gap1/Larp1/Tigar/Trp53inp2/Rab3gap2/Mul1/Hspb8/Wdr41/Adra1a/Eif4g1/Foxo3/Smcr8/Usp13/Clec16a/Plekhf1	54
		GO:0060537	muscle tissue development	78/1378	452/19650	9.28227e-14	5.11232e-11	3.88327e-11	Mef2d/Crhr2/Hdac9/Apc/Usp19/Homer1/Rbfox1/Prox1/Xk/Jph2/Meis1/Frs2/Sgcd/Myocd/Nf1/Asb2/Ryr2/Nln/Gata4/Rb1/Ppara/Gsk3b/Cxadr/Vegfa/Myom1/Svil/Zfand5/Speg/Obsl1/Hdac4/Ccnt2/Tsc1/Mtor/Sgcb/Lrp6/Mef2a/Myh14/Hdac6/Myom2/Sorbs2/Mylk3/Tbx20/Arid2/Map2k4/Gpc1/Fhod3/Six4/Ripor2/Fgf1/Rbm24/Alpk3/Cited2/Ppp1r13l/Myh6/Chd7/Dicer1/Pgm5/Pkp2/Dsg2/Dmd/Adra1a/Lemd3/Nrap/Sox6/Actn2/Myh7/Yap1/Camk2d/Slc8a1/Dsp/Smy…	78
		GO:0003012	muscle system process	71/1378	391/19650	9.3942e-14	5.11232e-11	3.88327e-11	Homer1/Kcnq1/Akap1/Sgcd/Smtn/Myocd/Rock2/Ryr2/Col4a3bp/Camk2g/Gata4/Atp8a2/Fbxo32/Ppara/Gsk3b/Myom1/Cacna1h/Dsc2/Nedd4l/Oga/Gaa/Obsl1/Hdac4/Parp1/Atp1b1/P2ry1/Tmod1/Mtor/Atp2a2/Lmod2/Klf15/Grip2/Mef2a/Myh14/Myom2/Sorbs2/Tbx20/Kcnj5/Scn5a/Ank2/Atp1a1/Kdm4a/Map2k4/Scn10a/Tnni3k/Cacna2d1/Abcc8/Ppp1r13l/Myh6/Pkp2/Trim72/Dsg2/Dock5/Dmd/Chrm2/Adra1a/Cmya5/Foxo3/Gpd1l/Prkca/Cacna1c/Actn2/Myh7/Camk2d/Slc…	71
		Up regulated in CD VEH – Down regulated in CD JZL184
		ID	Description	GeneRatio	BgRatio	pvalue	p.adjust	qvalue	geneID	Count
		GO:0002181	cytoplasmic translation	34/1203	81/19650	1.68229e-20	8.98342e-17	7.33301e-17	Rpl8/Rplp1/Rpl15/Rpl19/Rwdd1/Dph3/Rps26/Eif3m/Rpl6/Nck1/Rpsa/Rps29/Rpl10a/Rps21/Rps2/Rpl18a/Rpl9/Rpl29/Rps23/Rpl38/Rpl36/Rpl30/Rpl18/Rpl11/Rpl35a/Rpl26/Rpl17/Rplp0/Rps28/Rpl31/Rpl13a/Rpl39/Tma7/Rpl24	34
		GO:1901342	regulation of vasculature development	61/1203	334/19650	1.09932e-14	2.93517e-11	2.39593e-11	Pparg/Pdgfb/Acvrl1/Serpinf1/Ramp2/Efnb2/Klf4/Aqp1/Pgf/Ccl24/Hmox1/Tek/Gata2/Notch4/H2-M3/Cd34/Sparc/Mydgf/Akt3/Dcn/Ccl11/Vash1/Plk2/Rgcc/Enpp2/Rapgef3/Anxa1/Hhex/Pdcl3/Dll4/Il1b/Pdcd10/Nos3/Pf4/Anxa3/Tspan12/Ephb4/Cdh5/Ets1/Ctsh/Card10/Tie1/Jcad/Tbxa2r/Ccl2/Meox2/Hoxa5/Rras/Ptger4/Hey1/Prkd2/Mmrn2/Id1/Gpr4/Rhoj/Foxc1/Klf2/Itgb1bp1/Rap1a/Ecscr/Ceacam1	61
		GO:0034341	response to interferon-gamma	36/1203	135/19650	2.74259e-14	4.88181e-11	3.98493e-11	Pparg/Ccl24/Cdc42/Irf1/Cxcl16/Ccl11/Ifitm1/Ifitm3/Casp1/Slc11a1/Mrc1/Vim/Nmi/Tlr2/Gbp3/Gbp2/Gbp9/Trim21/Parp14/Ccl7/Ccl2/H2-Aa/Stx11/Gbp7/Cdc42ep2/Bst2/Vamp8/Rab7b/Capg/Ifitm2/Actg1/Rpl13a/Tgtp1/Gbp4/Ccl21a/Vamp8	36
		GO:0042254	ribosome biogenesis	53/1203	276/19650	7.70403e-14	1.02849e-10	8.39537e-11	C1d/Nhp2/Rpl10/Rps25/Rps5/Gtf3a/Ddx52/Fcf1/Ngdn/Rps14/Rps24/Rpl14/Nop10/Nop56/Eif6/Rps6/Mrpl20/Rpl6/Mphosph6/Imp3/Rpsa/Exosc1/Rps27l/Rps16/Rpl10a/Pak1ip1/Rpl12/Rps21/Rps19/Rpl7/Rps2/Rps8/Rps10/Npm1/Rpl38/Rpl23a/Rpl5/Rpl11/Rpl3/Rpl35a/Nsa2/Rpl26/Rps7/Rps17/Rpl7a/Rpl35/Rpl27/Rps15/Rplp0/Rps28/Rbis/Pin4/Rpl24	53
		GO:0045765	regulation of angiogenesis	55/1203	300/19650	1.93364e-13	2.06512e-10	1.68572e-10	Pparg/Acvrl1/Serpinf1/Ramp2/Klf4/Aqp1/Pgf/Ccl24/Hmox1/Tek/Gata2/Notch4/H2-M3/Cd34/Sparc/Mydgf/Akt3/Dcn/Ccl11/Vash1/Plk2/Rgcc/Enpp2/Rapgef3/Anxa1/Hhex/Pdcl3/Dll4/Il1b/Pdcd10/Nos3/Pf4/Anxa3/Tspan12/Cdh5/Ets1/Ctsh/Card10/Tie1/Jcad/Tbxa2r/Ccl2/Meox2/Hoxa5/Rras/Prkd2/Mmrn2/Id1/Gpr4/Rhoj/Foxc1/Klf2/Itgb1bp1/Ecscr/Ceacam1	55
		GO:0043542	endothelial cell migration	42/1203	197/19650	8.18894e-13	7.28815e-10	5.94919e-10	Pparg/Pdgfb/Acvrl1/Serpinf1/Efnb2/Apoe/Klf4/Hmox1/Tek/Gata2/Sparc/Akt3/Dcn/Pecam1/Vash1/Plk2/Rgcc/Myh9/Snai2/Anxa1/Coro1b/Dll4/Pdcd10/Nos3/Anxa3/Ephb4/Ets1/Card10/Vhl/Jcad/Loxl2/Tbxa2r/Dpp4/Meox2/Prkd2/Mmrn2/Clec14a/Rhoj/Prcp/Itgb1bp1/Ceacam1/Coro1b	42
		GO:0042255	ribosome assembly	22/1203	60/19650	2.55337e-12	1.94785e-09	1.59e-09	Rpl10/Rps25/Rps5/Rps14/Eif6/Mrpl20/Rpl6/Rpsa/Rps27l/Rpl12/Rps19/Rps2/Rps10/Rpl38/Rpl23a/Rpl5/Rpl11/Rpl3/Rps15/Rplp0/Rps28/Rpl24	22
		GO:0042274	ribosomal small subunit biogenesis	22/1203	62/19650	5.50027e-12	3.3184e-09	2.70875e-09	Rps25/Rps5/Ddx52/Fcf1/Ngdn/Rps14/Rps24/Rps6/Rpsa/Rps27l/Rps16/Rps21/Rps19/Rps2/Rps8/Rps10/Npm1/Rpl38/Rps7/Rps17/Rps15/Rps28	22
		GO:0043534	blood vessel endothelial cell migration	30/1203	114/19650	5.5928e-12	3.3184e-09	2.70875e-09	Pparg/Pdgfb/Acvrl1/Efnb2/Apoe/Klf4/Hmox1/Gata2/Akt3/Vash1/Plk2/Rgcc/Myh9/Anxa1/Dll4/Pdcd10/Nos3/Ephb4/Ets1/Card10/Vhl/Jcad/Tbxa2r/Meox2/Prkd2/Mmrn2/Clec14a/Rhoj/Prcp/Itgb1bp1	30
		GO:0050900	leukocyte migration	55/1203	338/19650	2.65745e-11	1.41908e-08	1.15837e-08	Pdgfb/Lgals9/Il16/Pgf/Ccl24/Cdc42/Rarres2/Eps8/Cd34/Cxcl16/Ccl11/Pecam1/Ednrb/Ripk3/Apod/Cd200/Pla2g7/Anxa1/Podxl/Il1r1/Il1b/Tlr2/Creb3/Pf4/Cxcl1/Cxcl9/Cd9/Coro1a/Swap70/Msn/Mpp1/Thy1/Myd88/Rac2/Mif/Itga2b/Gpsm3/Ccl7/Ccl2/Cyp7b1/Ptger4/Spns2/Rps19/Lyn/Hsd3b7/Selenok/Selplg/Ch25h/Plcb1/Fcer1g/Fcgr3/Mospd2/Mapk3/Rpl13a/Ccl21a	55

## Sheet: Figure 6e
	Figure 6e
	Row Data
		geneID	log2FoldChange.WTVEHvsCDVEH	log2FoldChange.CDVEHvsCDJZL184	cardiac	reversion	cardiac_rev
		ENSMUSG00000000001	0.278615	-0.405572	TRUE	TRUE	TRUE
		ENSMUSG00000000058	0.637328	-0.647325	TRUE	TRUE	TRUE
		ENSMUSG00000000078	0.158037	-0.311131	FALSE	FALSE	FALSE
		ENSMUSG00000000085	-0.331854	0.295643	FALSE	TRUE	FALSE
		ENSMUSG00000000088	0.0392437	-0.151688	FALSE	FALSE	FALSE
		ENSMUSG00000000093	0.478789	-0.187273	TRUE	FALSE	FALSE
		ENSMUSG00000000142	-0.31238	0.611291	TRUE	FALSE	FALSE
		ENSMUSG00000000149	-0.11	0.226533	TRUE	FALSE	FALSE
		ENSMUSG00000000168	-0.44908	0.39634	FALSE	TRUE	FALSE
		ENSMUSG00000000183	-1.20978	0.674686	FALSE	FALSE	FALSE
		ENSMUSG00000000184	-0.224275	0.299878	FALSE	FALSE	FALSE
		ENSMUSG00000000194	-0.237575	0.199295	FALSE	TRUE	FALSE
		ENSMUSG00000000204	0.937326	-1.05992	FALSE	FALSE	FALSE
		ENSMUSG00000000253	-0.0480051	0.177534	FALSE	FALSE	FALSE
		ENSMUSG00000000266	-0.274872	0.196267	FALSE	TRUE	FALSE
		ENSMUSG00000000278	0.403654	-0.288397	TRUE	FALSE	FALSE
		ENSMUSG00000000290	0.345949	-0.596785	TRUE	FALSE	FALSE
		ENSMUSG00000000295	0.708345	-0.145623	FALSE	FALSE	FALSE
		ENSMUSG00000000305	-1.82475	0.465945	FALSE	FALSE	FALSE
		ENSMUSG00000000317	0.914771	-0.522967	FALSE	TRUE	FALSE
		ENSMUSG00000000320	0.795264	-0.243519	TRUE	FALSE	FALSE
		ENSMUSG00000000355	0.0572491	-0.217642	FALSE	FALSE	FALSE
		ENSMUSG00000000359	0.35627	-0.267425	FALSE	FALSE	FALSE
		ENSMUSG00000000365	-0.360645	-1.25051	FALSE	FALSE	FALSE
		ENSMUSG00000000374	-0.276974	0.310725	FALSE	TRUE	FALSE
		ENSMUSG00000000384	-0.212623	0.239425	FALSE	TRUE	FALSE
		ENSMUSG00000000440	0.513698	-0.403153	TRUE	TRUE	TRUE
		ENSMUSG00000000441	-0.213219	0.226312	FALSE	TRUE	FALSE
		ENSMUSG00000000486	0.883328	-0.30967	FALSE	FALSE	FALSE
		ENSMUSG00000000489	0.618788	-0.515343	TRUE	TRUE	TRUE
		ENSMUSG00000000530	0.342193	-0.238078	TRUE	TRUE	TRUE
		ENSMUSG00000000531	0.64133	-0.480018	FALSE	FALSE	FALSE
		ENSMUSG00000000532	-0.128427	0.296993	TRUE	FALSE	FALSE
		ENSMUSG00000000538	-0.2682	0.348822	FALSE	TRUE	FALSE
		ENSMUSG00000000555	-0.34404	0.235539	TRUE	FALSE	FALSE
		ENSMUSG00000000561	-0.239692	0.213583	FALSE	TRUE	FALSE
		ENSMUSG00000000581	0.265365	-0.465965	FALSE	TRUE	FALSE
		ENSMUSG00000000594	0.297161	-0.255795	FALSE	TRUE	FALSE
		ENSMUSG00000000600	-0.210524	0.150826	TRUE	FALSE	FALSE
		ENSMUSG00000000628	-0.463206	0.514104	TRUE	TRUE	TRUE
		ENSMUSG00000000631	-0.366598	0.350947	TRUE	TRUE	TRUE
		ENSMUSG00000000682	0.733391	-0.810804	FALSE	FALSE	FALSE
		ENSMUSG00000000693	0.278884	-0.313864	TRUE	FALSE	FALSE
		ENSMUSG00000000708	-0.174357	0.237048	FALSE	FALSE	FALSE
		ENSMUSG00000000711	-0.119326	0.144317	FALSE	FALSE	FALSE
		ENSMUSG00000000738	-0.248946	0.258964	FALSE	TRUE	FALSE
		ENSMUSG00000000740	0.46864	-0.488799	FALSE	TRUE	FALSE
		ENSMUSG00000000753	0.381467	-0.363088	TRUE	TRUE	TRUE
		ENSMUSG00000000804	-0.220174	0.317119	FALSE	TRUE	FALSE
		ENSMUSG00000000805	0.690074	-0.506088	FALSE	TRUE	FALSE
		ENSMUSG00000000826	-0.226989	0.185839	FALSE	TRUE	FALSE
		ENSMUSG00000000861	-0.192957	0.496762	FALSE	FALSE	FALSE
		ENSMUSG00000000959	-0.163389	0.204874	FALSE	FALSE	FALSE
		ENSMUSG00000000976	-0.19933	0.231141	FALSE	FALSE	FALSE
		ENSMUSG00000001020	0.933012	-1.04671	FALSE	TRUE	FALSE
		ENSMUSG00000001025	0.676548	-0.743377	FALSE	TRUE	FALSE
		ENSMUSG00000001027	0.051262	0.685591	TRUE	FALSE	FALSE
		ENSMUSG00000001029	0.551103	-0.644048	FALSE	TRUE	FALSE
		ENSMUSG00000001052	-0.0646636	0.168903	TRUE	FALSE	FALSE
		ENSMUSG00000001053	0.74905	-0.314516	FALSE	TRUE	FALSE
		ENSMUSG00000001056	0.411633	-0.432538	FALSE	TRUE	FALSE
		ENSMUSG00000001098	0.305286	-0.380707	FALSE	TRUE	FALSE
		ENSMUSG00000001100	-0.219242	0.206398	FALSE	TRUE	FALSE
		ENSMUSG00000001105	0.268023	-0.295229	TRUE	TRUE	TRUE
		ENSMUSG00000001119	0.390037	-0.230085	FALSE	FALSE	FALSE
		ENSMUSG00000001123	0.676547	-0.539255	TRUE	TRUE	TRUE
		ENSMUSG00000001128	0.51628	-0.69692	FALSE	TRUE	FALSE
		ENSMUSG00000001134	0.173575	-0.237718	FALSE	FALSE	FALSE
		ENSMUSG00000001143	-0.315373	0.366632	FALSE	TRUE	FALSE
		ENSMUSG00000001150	-0.272746	0.164793	FALSE	FALSE	FALSE
		ENSMUSG00000001151	-0.39524	0.468256	FALSE	TRUE	FALSE
		ENSMUSG00000001158	0.291292	-0.369735	FALSE	TRUE	FALSE
		ENSMUSG00000001166	0.841121	-0.22517	FALSE	FALSE	FALSE
		ENSMUSG00000001173	-0.234818	0.151225	FALSE	FALSE	FALSE
		ENSMUSG00000001175	0.109574	-0.213642	FALSE	FALSE	FALSE
		ENSMUSG00000001229	-0.221852	0.277585	FALSE	FALSE	FALSE
		ENSMUSG00000001240	0.656659	-0.510629	TRUE	TRUE	TRUE
		ENSMUSG00000001249	-0.941757	0.0921604	TRUE	FALSE	FALSE
		ENSMUSG00000001288	0.66927	-0.431458	TRUE	TRUE	TRUE
		ENSMUSG00000001289	0.374338	-0.418478	FALSE	TRUE	FALSE
		ENSMUSG00000001300	0.493985	-0.275487	TRUE	TRUE	TRUE
		ENSMUSG00000001305	0.141069	-0.294566	FALSE	FALSE	FALSE
		ENSMUSG00000001313	0.533293	-0.520152	FALSE	TRUE	FALSE
		ENSMUSG00000001333	-0.494235	0.357392	FALSE	TRUE	FALSE
		ENSMUSG00000001383	0.19508	-0.228734	FALSE	TRUE	FALSE
		ENSMUSG00000001415	-0.240835	0.292064	FALSE	TRUE	FALSE
		ENSMUSG00000001418	0.292757	-0.219103	FALSE	TRUE	FALSE
		ENSMUSG00000001419	-0.321189	0.414233	TRUE	TRUE	TRUE
		ENSMUSG00000001424	-0.236382	0.31696	FALSE	TRUE	FALSE
		ENSMUSG00000001440	-0.264854	0.29533	FALSE	TRUE	FALSE
		ENSMUSG00000001441	-0.378718	0.42359	FALSE	TRUE	FALSE
		ENSMUSG00000001482	-0.231562	0.231553	FALSE	TRUE	FALSE
		ENSMUSG00000001493	0.266582	-0.531867	FALSE	FALSE	FALSE
		ENSMUSG00000001507	-0.234708	0.350894	FALSE	FALSE	FALSE
		ENSMUSG00000001518	-0.11714	0.24535	FALSE	FALSE	FALSE
		ENSMUSG00000001525	0.228209	-0.305903	FALSE	FALSE	FALSE
		ENSMUSG00000001739	0.954363	-0.761334	FALSE	TRUE	FALSE
		ENSMUSG00000001741	0.465483	-0.33775	FALSE	TRUE	FALSE
		ENSMUSG00000001750	0.415585	-0.539832	FALSE	TRUE	FALSE
		ENSMUSG00000001761	0.387495	-0.116235	TRUE	FALSE	FALSE
		ENSMUSG00000001768	0.278384	-0.078907	TRUE	FALSE	FALSE
		ENSMUSG00000001802	-0.0369132	0.30585	FALSE	FALSE	FALSE
		ENSMUSG00000001829	-0.264471	0.307595	FALSE	FALSE	FALSE
		ENSMUSG00000001833	0.0882422	-0.274287	FALSE	FALSE	FALSE
		ENSMUSG00000001844	0.264091	-0.248504	FALSE	FALSE	FALSE
		ENSMUSG00000001855	-0.128468	0.20275	FALSE	FALSE	FALSE
		ENSMUSG00000001870	-0.232049	0.193932	TRUE	FALSE	FALSE
		ENSMUSG00000001891	-0.319863	0.0923371	FALSE	FALSE	FALSE
		ENSMUSG00000001910	-0.168438	0.241545	FALSE	FALSE	FALSE
		ENSMUSG00000001911	-0.284013	0.489978	FALSE	FALSE	FALSE
		ENSMUSG00000001918	0.228652	-0.374641	TRUE	FALSE	FALSE
		ENSMUSG00000001924	-0.218435	0.280206	FALSE	TRUE	FALSE
		ENSMUSG00000001943	-0.749992	0.242141	FALSE	FALSE	FALSE
		ENSMUSG00000001946	0.302885	-0.421779	FALSE	TRUE	FALSE
		ENSMUSG00000001948	0.244554	-0.470488	FALSE	FALSE	FALSE
		ENSMUSG00000001995	-0.333629	0.37161	FALSE	TRUE	FALSE
		ENSMUSG00000001998	-0.336469	0.301976	FALSE	TRUE	FALSE
		ENSMUSG00000001999	0.260774	-0.264769	FALSE	TRUE	FALSE
		ENSMUSG00000002007	-0.258971	0.056802	TRUE	FALSE	FALSE
		ENSMUSG00000002012	-0.288172	0.305754	FALSE	FALSE	FALSE
		ENSMUSG00000002014	0.326973	-0.420459	FALSE	TRUE	FALSE
		ENSMUSG00000002020	-0.74661	0.284252	FALSE	FALSE	FALSE
		ENSMUSG00000002028	-0.4262	0.327136	FALSE	TRUE	FALSE
		ENSMUSG00000002031	0.278419	-0.214345	FALSE	FALSE	FALSE
		ENSMUSG00000002032	-0.279951	0.403086	FALSE	TRUE	FALSE
		ENSMUSG00000002052	-0.140081	0.186319	TRUE	FALSE	FALSE
		ENSMUSG00000002059	0.363508	-0.283187	FALSE	TRUE	FALSE
		ENSMUSG00000002064	0.187264	-0.218993	FALSE	FALSE	FALSE
		ENSMUSG00000002100	-0.349663	0.414372	TRUE	FALSE	FALSE
		ENSMUSG00000002102	0.267418	-0.139105	FALSE	FALSE	FALSE
		ENSMUSG00000002107	-0.364426	0.34199	FALSE	TRUE	FALSE
		ENSMUSG00000002109	0.20667	-0.337752	FALSE	FALSE	FALSE
		ENSMUSG00000002111	0.694708	-0.747601	TRUE	TRUE	TRUE
		ENSMUSG00000002129	-0.407826	0.33527	FALSE	TRUE	FALSE
		ENSMUSG00000002222	-0.360564	0.288886	FALSE	TRUE	FALSE
		ENSMUSG00000002233	0.478185	-0.609552	TRUE	TRUE	TRUE
		ENSMUSG00000002249	-0.423229	0.235009	FALSE	TRUE	FALSE
		ENSMUSG00000002266	-0.532646	0.701139	FALSE	TRUE	FALSE
		ENSMUSG00000002280	-0.305157	0.190556	FALSE	TRUE	FALSE
		ENSMUSG00000002297	0.287515	-0.528595	FALSE	FALSE	FALSE
		ENSMUSG00000002319	-0.174191	0.216048	FALSE	FALSE	FALSE
		ENSMUSG00000002325	0.67979	-0.512632	FALSE	TRUE	FALSE
		ENSMUSG00000002326	0.238564	-0.264961	FALSE	FALSE	FALSE
		ENSMUSG00000002346	-0.395418	0.5282	FALSE	TRUE	FALSE
		ENSMUSG00000002379	0.252732	-0.297473	FALSE	TRUE	FALSE
		ENSMUSG00000002395	0.405002	-0.385878	FALSE	TRUE	FALSE
		ENSMUSG00000002416	0.250548	-0.340411	FALSE	TRUE	FALSE
		ENSMUSG00000002489	-0.211326	0.460041	TRUE	FALSE	FALSE
		ENSMUSG00000002496	-0.275872	0.334493	FALSE	TRUE	FALSE
		ENSMUSG00000002504	0.546519	-0.392468	FALSE	TRUE	FALSE
		ENSMUSG00000002546	-0.24982	0.344677	FALSE	TRUE	FALSE
		ENSMUSG00000002550	0.268483	-0.17786	FALSE	TRUE	FALSE
		ENSMUSG00000002602	0.359037	-0.417615	TRUE	TRUE	TRUE
		ENSMUSG00000002603	0.515829	-0.208478	TRUE	FALSE	FALSE
		ENSMUSG00000002608	-0.192523	0.283794	FALSE	FALSE	FALSE
		ENSMUSG00000002617	0.545492	-0.535008	FALSE	TRUE	FALSE
		ENSMUSG00000002625	-0.320378	0.2588	FALSE	TRUE	FALSE
		ENSMUSG00000002679	0.388705	-0.528807	FALSE	TRUE	FALSE
		ENSMUSG00000002728	0.18712	-0.316176	FALSE	FALSE	FALSE
		ENSMUSG00000002732	0.447413	-0.349349	FALSE	TRUE	FALSE
		ENSMUSG00000002733	0.239855	-0.208485	FALSE	TRUE	FALSE
		ENSMUSG00000002763	-0.216359	0.266143	FALSE	FALSE	FALSE
		ENSMUSG00000002768	0.360093	-0.418151	FALSE	TRUE	FALSE
		ENSMUSG00000002769	0.772231	0.0980514	FALSE	FALSE	FALSE
		ENSMUSG00000002771	-0.260201	0.64536	FALSE	FALSE	FALSE
		ENSMUSG00000002781	-0.284933	0.341589	FALSE	TRUE	FALSE
		ENSMUSG00000002812	-0.284141	0.288342	TRUE	TRUE	TRUE
		ENSMUSG00000002831	-0.337277	0.310623	FALSE	TRUE	FALSE
		ENSMUSG00000002847	0.718286	-0.610107	FALSE	TRUE	FALSE
		ENSMUSG00000002881	0.254229	-0.192962	FALSE	TRUE	FALSE
		ENSMUSG00000002885	0.275074	-0.289825	FALSE	TRUE	FALSE
		ENSMUSG00000002948	-0.144922	0.234079	TRUE	FALSE	FALSE
		ENSMUSG00000002968	-0.142606	0.258762	FALSE	FALSE	FALSE
		ENSMUSG00000002980	0.22429	-0.0402613	FALSE	FALSE	FALSE
		ENSMUSG00000002983	0.505136	-0.247799	FALSE	FALSE	FALSE
		ENSMUSG00000002984	0.0160926	0.185475	FALSE	FALSE	FALSE
		ENSMUSG00000002985	0.755806	-0.636554	TRUE	TRUE	TRUE
		ENSMUSG00000003032	0.433353	-0.623062	TRUE	TRUE	TRUE
		ENSMUSG00000003037	0.264484	-0.140355	FALSE	FALSE	FALSE
		ENSMUSG00000003039	0.274289	-0.268656	FALSE	TRUE	FALSE
		ENSMUSG00000003062	0.0857401	-0.261886	FALSE	FALSE	FALSE
		ENSMUSG00000003099	-0.0955304	0.151261	FALSE	FALSE	FALSE
		ENSMUSG00000003134	-0.24356	0.289765	FALSE	FALSE	FALSE
		ENSMUSG00000003153	0.827012	-0.212963	TRUE	FALSE	FALSE
		ENSMUSG00000003154	-0.228803	0.414945	TRUE	FALSE	FALSE
		ENSMUSG00000003161	0.36647	-0.411595	TRUE	TRUE	TRUE
		ENSMUSG00000003166	-0.120846	0.174605	FALSE	FALSE	FALSE
		ENSMUSG00000003184	0.372917	-0.338204	FALSE	TRUE	FALSE
		ENSMUSG00000003199	0.433741	0.028378	FALSE	FALSE	FALSE
		ENSMUSG00000003200	0.437219	-0.31651	FALSE	TRUE	FALSE
		ENSMUSG00000003206	0.893627	-0.428595	FALSE	FALSE	FALSE
		ENSMUSG00000003228	0.810833	0.0302281	FALSE	FALSE	FALSE
		ENSMUSG00000003233	-0.419657	0.602252	TRUE	TRUE	TRUE
		ENSMUSG00000003269	0.185031	-0.0980854	FALSE	FALSE	FALSE
		ENSMUSG00000003316	-0.405628	0.49995	FALSE	TRUE	FALSE
		ENSMUSG00000003345	0.242231	-0.069971	FALSE	FALSE	FALSE
		ENSMUSG00000003346	0.42637	-0.220597	FALSE	FALSE	FALSE
		ENSMUSG00000003352	0.484996	-0.413852	FALSE	TRUE	FALSE
		ENSMUSG00000003380	0.360047	-0.259854	FALSE	TRUE	FALSE
		ENSMUSG00000003418	0.370221	-0.408204	FALSE	FALSE	FALSE
		ENSMUSG00000003420	0.461134	-0.35163	FALSE	TRUE	FALSE
		ENSMUSG00000003421	0.198368	-0.0730292	FALSE	FALSE	FALSE
		ENSMUSG00000003429	0.444401	-0.384019	FALSE	TRUE	FALSE
		ENSMUSG00000003435	-0.0644994	0.130781	FALSE	FALSE	FALSE
		ENSMUSG00000003452	-0.497911	0.378158	FALSE	TRUE	FALSE
		ENSMUSG00000003464	-0.170418	0.167438	FALSE	FALSE	FALSE
		ENSMUSG00000003476	-0.274127	0.44433	TRUE	TRUE	TRUE
		ENSMUSG00000003500	0.384663	-0.118249	FALSE	FALSE	FALSE
		ENSMUSG00000003528	0.520541	-0.10951	FALSE	FALSE	FALSE
		ENSMUSG00000003531	0.247895	-0.120943	FALSE	FALSE	FALSE
		ENSMUSG00000003534	-0.0991874	0.348006	TRUE	FALSE	FALSE
		ENSMUSG00000003549	0.287819	-0.28502	FALSE	TRUE	FALSE
		ENSMUSG00000003573	0.701286	-0.481336	FALSE	TRUE	FALSE
		ENSMUSG00000003575	-0.352733	0.467566	FALSE	TRUE	FALSE
		ENSMUSG00000003585	1.05192	-0.22889	FALSE	FALSE	FALSE
		ENSMUSG00000003644	0.524451	-0.260694	FALSE	FALSE	FALSE
		ENSMUSG00000003680	0.384295	-0.242304	FALSE	FALSE	FALSE
		ENSMUSG00000003731	-0.444213	0.415568	FALSE	TRUE	FALSE
		ENSMUSG00000003752	-0.23034	0.358335	FALSE	FALSE	FALSE
		ENSMUSG00000003810	-0.520615	0.45381	FALSE	TRUE	FALSE
		ENSMUSG00000003812	0.277831	-0.146457	TRUE	FALSE	FALSE
		ENSMUSG00000003847	-0.37641	0.282956	FALSE	FALSE	FALSE
		ENSMUSG00000003865	-0.464836	0.564614	FALSE	TRUE	FALSE
		ENSMUSG00000003873	0.554729	-0.411421	TRUE	TRUE	TRUE
		ENSMUSG00000003949	-0.545097	0.359856	TRUE	FALSE	FALSE
		ENSMUSG00000003955	0.188658	-0.325378	FALSE	FALSE	FALSE
		ENSMUSG00000003970	0.299643	-0.328571	FALSE	TRUE	FALSE
		ENSMUSG00000003992	-0.299799	0.0444965	FALSE	FALSE	FALSE
		ENSMUSG00000004032	0.260337	-0.23562	FALSE	TRUE	FALSE
		ENSMUSG00000004035	-0.194968	0.199784	FALSE	FALSE	FALSE
		ENSMUSG00000004044	0.516949	-0.431196	FALSE	TRUE	FALSE
		ENSMUSG00000004054	0.483798	-0.221008	FALSE	TRUE	FALSE
		ENSMUSG00000004069	-0.290406	0.255007	TRUE	TRUE	TRUE
		ENSMUSG00000004071	-0.0805497	0.141519	FALSE	FALSE	FALSE
		ENSMUSG00000004085	-0.490352	0.454677	FALSE	TRUE	FALSE
		ENSMUSG00000004096	0.192502	-0.276549	FALSE	TRUE	FALSE
		ENSMUSG00000004100	0.370821	-0.405181	FALSE	FALSE	FALSE
		ENSMUSG00000004207	-0.230686	0.347635	FALSE	FALSE	FALSE
		ENSMUSG00000004221	-0.26685	0.174511	FALSE	FALSE	FALSE
		ENSMUSG00000004266	0.78205	-0.451244	TRUE	TRUE	TRUE
		ENSMUSG00000004268	0.116066	-0.237839	FALSE	FALSE	FALSE
		ENSMUSG00000004285	0.238551	-0.273987	FALSE	TRUE	FALSE
		ENSMUSG00000004347	-0.617604	0.425952	FALSE	TRUE	FALSE
		ENSMUSG00000004356	-0.273349	0.326192	FALSE	FALSE	FALSE
		ENSMUSG00000004360	-0.895364	0.389461	FALSE	FALSE	FALSE
		ENSMUSG00000004364	-0.370934	0.28398	TRUE	TRUE	TRUE
		ENSMUSG00000004383	-0.38601	0.381117	TRUE	TRUE	TRUE
		ENSMUSG00000004451	0.130393	-0.176655	FALSE	FALSE	FALSE
		ENSMUSG00000004508	0.269119	-0.145338	FALSE	FALSE	FALSE
		ENSMUSG00000004530	0.367301	-0.304664	FALSE	TRUE	FALSE
		ENSMUSG00000004552	2.32227	-2.20105	FALSE	FALSE	FALSE
		ENSMUSG00000004558	-0.20818	0.213625	TRUE	FALSE	FALSE
		ENSMUSG00000004631	0.483258	-0.437281	FALSE	TRUE	FALSE
		ENSMUSG00000004655	0.560916	-0.685099	TRUE	TRUE	TRUE
		ENSMUSG00000004661	-0.277305	0.430014	FALSE	FALSE	FALSE
		ENSMUSG00000004665	0.120697	-0.309651	TRUE	FALSE	FALSE
		ENSMUSG00000004667	0.23704	-0.0925255	FALSE	FALSE	FALSE
		ENSMUSG00000004677	-0.360735	0.238062	FALSE	TRUE	FALSE
		ENSMUSG00000004698	-0.357292	0.370237	TRUE	TRUE	TRUE
		ENSMUSG00000004730	0.421888	-0.427416	FALSE	TRUE	FALSE
		ENSMUSG00000004748	-0.194591	0.131708	FALSE	FALSE	FALSE
		ENSMUSG00000004789	-0.315603	0.2568	FALSE	TRUE	FALSE
		ENSMUSG00000004791	0.535946	-0.564041	TRUE	TRUE	TRUE
		ENSMUSG00000004798	-0.2519	0.225087	FALSE	TRUE	FALSE
		ENSMUSG00000004814	0.75747	-0.770294	TRUE	TRUE	TRUE
		ENSMUSG00000004837	0.711695	-0.571174	FALSE	TRUE	FALSE
		ENSMUSG00000004849	0.18196	-0.255266	FALSE	FALSE	FALSE
		ENSMUSG00000004880	0.236509	-0.139585	FALSE	FALSE	FALSE
		ENSMUSG00000004891	0.550513	-0.556607	FALSE	TRUE	FALSE
		ENSMUSG00000004945	0.183091	-0.243429	FALSE	TRUE	FALSE
		ENSMUSG00000004952	0.534902	-0.291383	FALSE	FALSE	FALSE
		ENSMUSG00000005034	-0.19767	0.148309	FALSE	FALSE	FALSE
		ENSMUSG00000005054	0.510362	-0.438578	FALSE	TRUE	FALSE
		ENSMUSG00000005069	-0.214034	0.331718	FALSE	TRUE	FALSE
		ENSMUSG00000005089	-1.79409	1.46699	TRUE	TRUE	TRUE
		ENSMUSG00000005107	0.888493	-0.444704	FALSE	FALSE	FALSE
		ENSMUSG00000005124	-0.722708	0.860524	TRUE	FALSE	FALSE
		ENSMUSG00000005125	0.284886	-0.346058	FALSE	TRUE	FALSE
		ENSMUSG00000005198	-0.36931	0.379284	FALSE	TRUE	FALSE
		ENSMUSG00000005220	-0.364423	0.398808	TRUE	TRUE	TRUE
		ENSMUSG00000005237	0.6972	-0.349771	FALSE	FALSE	FALSE
		ENSMUSG00000005251	-0.409137	1.00725	FALSE	FALSE	FALSE
		ENSMUSG00000005268	-0.0999442	0.46343	FALSE	FALSE	FALSE
		ENSMUSG00000005312	-0.214533	0.1607	FALSE	TRUE	FALSE
		ENSMUSG00000005371	-0.18275	0.142592	FALSE	FALSE	FALSE
		ENSMUSG00000005410	0.657382	-0.407299	FALSE	FALSE	FALSE
		ENSMUSG00000005413	1.72391	-1.65034	TRUE	TRUE	TRUE
		ENSMUSG00000005442	-0.039553	0.252028	FALSE	FALSE	FALSE
		ENSMUSG00000005469	-0.325182	0.35635	FALSE	TRUE	FALSE
		ENSMUSG00000005481	0.141503	-0.212376	FALSE	FALSE	FALSE
		ENSMUSG00000005483	0.834464	-0.237717	FALSE	FALSE	FALSE
		ENSMUSG00000005493	-0.741532	0.350146	FALSE	FALSE	FALSE
		ENSMUSG00000005501	-0.419394	0.345154	FALSE	TRUE	FALSE
		ENSMUSG00000005506	-0.199836	0.248452	FALSE	TRUE	FALSE
		ENSMUSG00000005534	-0.551687	0.495588	TRUE	TRUE	TRUE
		ENSMUSG00000005580	-0.434626	0.566924	FALSE	TRUE	FALSE
		ENSMUSG00000005583	-0.240662	0.258935	TRUE	FALSE	FALSE
		ENSMUSG00000005609	-0.217709	0.152514	TRUE	FALSE	FALSE
		ENSMUSG00000005610	-0.218212	0.195324	FALSE	TRUE	FALSE
		ENSMUSG00000005611	0.404731	-0.285553	TRUE	FALSE	FALSE
		ENSMUSG00000005615	-0.306782	0.305794	FALSE	TRUE	FALSE
		ENSMUSG00000005625	0.222759	-0.108905	FALSE	FALSE	FALSE
		ENSMUSG00000005628	-0.702091	-0.0576438	TRUE	FALSE	FALSE
		ENSMUSG00000005683	-0.356095	0.331322	FALSE	TRUE	FALSE
		ENSMUSG00000005686	-0.195146	0.306127	FALSE	TRUE	FALSE
		ENSMUSG00000005732	0.254477	-0.276004	FALSE	FALSE	FALSE
		ENSMUSG00000005779	0.139888	-0.152789	FALSE	FALSE	FALSE
		ENSMUSG00000005802	0.191994	-0.205801	FALSE	FALSE	FALSE
		ENSMUSG00000005813	-0.230088	0.207514	FALSE	TRUE	FALSE
		ENSMUSG00000005871	-0.239857	0.229223	TRUE	TRUE	TRUE
		ENSMUSG00000005873	-0.0936311	0.161187	FALSE	FALSE	FALSE
		ENSMUSG00000005881	0.228528	-0.0908642	FALSE	FALSE	FALSE
		ENSMUSG00000005882	-0.288874	0.204129	FALSE	FALSE	FALSE
		ENSMUSG00000005886	-0.468538	0.48985	FALSE	TRUE	FALSE
		ENSMUSG00000005899	-0.26161	0.2271	FALSE	TRUE	FALSE
		ENSMUSG00000005907	-0.38801	0.358641	FALSE	TRUE	FALSE
		ENSMUSG00000005950	-0.482173	0.377823	FALSE	TRUE	FALSE
		ENSMUSG00000005951	0.54643	-0.361226	FALSE	FALSE	FALSE
		ENSMUSG00000005958	-0.751076	0.594017	FALSE	TRUE	FALSE
		ENSMUSG00000005973	0.29497	-0.174654	FALSE	FALSE	FALSE
		ENSMUSG00000005980	-0.527634	0.475229	FALSE	TRUE	FALSE
		ENSMUSG00000005981	-0.333094	0.367835	FALSE	TRUE	FALSE
		ENSMUSG00000005982	-0.236719	0.207033	FALSE	TRUE	FALSE
		ENSMUSG00000006005	-0.331226	0.263395	FALSE	TRUE	FALSE
		ENSMUSG00000006021	-0.156203	0.236573	FALSE	FALSE	FALSE
		ENSMUSG00000006050	0.105567	-0.249797	FALSE	FALSE	FALSE
		ENSMUSG00000006057	0.342632	-0.293974	FALSE	TRUE	FALSE
		ENSMUSG00000006134	-0.261546	0.284747	TRUE	TRUE	TRUE
		ENSMUSG00000006169	-0.216593	0.273211	FALSE	TRUE	FALSE
		ENSMUSG00000006219	-0.415737	0.362521	FALSE	TRUE	FALSE
		ENSMUSG00000006221	-0.253398	0.20757	FALSE	TRUE	FALSE
		ENSMUSG00000006241	-0.20344	0.410463	FALSE	FALSE	FALSE
		ENSMUSG00000006262	-0.508299	0.341305	FALSE	TRUE	FALSE
		ENSMUSG00000006276	-0.342492	0.264966	FALSE	TRUE	FALSE
		ENSMUSG00000006281	-0.219114	0.291474	FALSE	FALSE	FALSE
		ENSMUSG00000006288	0.294567	-0.289104	FALSE	TRUE	FALSE
		ENSMUSG00000006307	-0.196783	0.202388	FALSE	FALSE	FALSE
		ENSMUSG00000006315	0.266198	-0.263614	FALSE	TRUE	FALSE
		ENSMUSG00000006333	0.258265	-0.289488	FALSE	TRUE	FALSE
		ENSMUSG00000006344	0.370017	-0.347511	FALSE	TRUE	FALSE
		ENSMUSG00000006360	0.602228	-0.823957	FALSE	TRUE	FALSE
		ENSMUSG00000006373	0.454044	-0.345086	FALSE	TRUE	FALSE
		ENSMUSG00000006386	0.389674	-0.331872	TRUE	TRUE	TRUE
		ENSMUSG00000006390	0.499108	-0.449353	FALSE	TRUE	FALSE
		ENSMUSG00000006392	0.0527336	-0.204355	FALSE	FALSE	FALSE
		ENSMUSG00000006412	0.25957	-0.167983	FALSE	FALSE	FALSE
		ENSMUSG00000006442	0.273702	-0.380812	FALSE	FALSE	FALSE
		ENSMUSG00000006445	0.170214	-0.2445	TRUE	FALSE	FALSE
		ENSMUSG00000006494	-0.439184	0.406755	FALSE	TRUE	FALSE
		ENSMUSG00000006498	0.409839	-0.333256	TRUE	TRUE	TRUE
		ENSMUSG00000006527	-0.26556	0.25194	TRUE	TRUE	TRUE
		ENSMUSG00000006542	-0.77129	0.236824	TRUE	FALSE	FALSE
		ENSMUSG00000006574	2.25804	-2.65082	TRUE	FALSE	FALSE
		ENSMUSG00000006576	-0.215083	0.356385	TRUE	FALSE	FALSE
		ENSMUSG00000006589	0.359061	-0.23253	FALSE	FALSE	FALSE
		ENSMUSG00000006641	-0.116325	0.249802	TRUE	FALSE	FALSE
		ENSMUSG00000006676	-0.351641	0.325171	TRUE	TRUE	TRUE
		ENSMUSG00000006699	0.330394	-0.289698	TRUE	TRUE	TRUE
		ENSMUSG00000006717	0.184948	-0.330322	FALSE	FALSE	FALSE
		ENSMUSG00000006720	1.00466	-0.615162	FALSE	FALSE	FALSE
		ENSMUSG00000006728	0.226247	-0.1729	FALSE	TRUE	FALSE
		ENSMUSG00000006731	0.6692	-0.457284	FALSE	FALSE	FALSE
		ENSMUSG00000006736	0.106963	-0.153562	FALSE	FALSE	FALSE
		ENSMUSG00000006740	-0.439445	0.277096	FALSE	TRUE	FALSE
		ENSMUSG00000006763	0.368703	-0.223722	FALSE	FALSE	FALSE
		ENSMUSG00000006782	0.381389	-0.36725	FALSE	TRUE	FALSE
		ENSMUSG00000006998	-0.154894	0.226359	FALSE	FALSE	FALSE
		ENSMUSG00000007029	-0.132138	0.249175	FALSE	FALSE	FALSE
		ENSMUSG00000007030	-0.503263	0.562392	FALSE	TRUE	FALSE
		ENSMUSG00000007036	0.211916	-0.0610219	FALSE	FALSE	FALSE
		ENSMUSG00000007039	0.536661	-0.542118	FALSE	TRUE	FALSE
		ENSMUSG00000007041	0.499057	-0.567371	FALSE	TRUE	FALSE
		ENSMUSG00000007097	-0.282018	0.320325	TRUE	FALSE	FALSE
		ENSMUSG00000007279	-0.375533	0.408393	FALSE	TRUE	FALSE
		ENSMUSG00000007411	-0.162784	0.214263	FALSE	FALSE	FALSE
		ENSMUSG00000007458	0.270428	-0.227435	FALSE	TRUE	FALSE
		ENSMUSG00000007564	-0.145143	0.221296	FALSE	FALSE	FALSE
		ENSMUSG00000007570	0.480679	-0.152275	FALSE	FALSE	FALSE
		ENSMUSG00000007589	0.336724	-0.257995	FALSE	TRUE	FALSE
		ENSMUSG00000007617	-0.647913	0.434158	TRUE	TRUE	TRUE
		ENSMUSG00000007655	0.65839	-0.51657	TRUE	TRUE	TRUE
		ENSMUSG00000007670	-0.221315	0.252534	FALSE	TRUE	FALSE
		ENSMUSG00000007721	0.220016	-0.190552	FALSE	TRUE	FALSE
		ENSMUSG00000007777	0.145307	-0.248256	FALSE	FALSE	FALSE
		ENSMUSG00000007815	0.0686528	-0.13146	TRUE	FALSE	FALSE
		ENSMUSG00000007872	0.882161	-0.847311	TRUE	TRUE	TRUE
		ENSMUSG00000007880	-0.124967	0.229036	TRUE	FALSE	FALSE
		ENSMUSG00000007891	-0.232347	0.23568	FALSE	FALSE	FALSE
		ENSMUSG00000007892	0.509899	-0.544893	FALSE	TRUE	FALSE
		ENSMUSG00000007950	0.261426	-0.0881298	FALSE	FALSE	FALSE
		ENSMUSG00000008035	-0.240945	0.518841	FALSE	FALSE	FALSE
		ENSMUSG00000008036	0.220514	-0.203753	FALSE	TRUE	FALSE
		ENSMUSG00000008136	0.302365	-0.196362	TRUE	FALSE	FALSE
		ENSMUSG00000008301	0.170939	-0.250067	FALSE	FALSE	FALSE
		ENSMUSG00000008307	-1.12134	0.693747	FALSE	TRUE	FALSE
		ENSMUSG00000008318	-0.48218	0.359375	FALSE	FALSE	FALSE
		ENSMUSG00000008333	0.315816	-0.385136	FALSE	TRUE	FALSE
		ENSMUSG00000008348	-0.377035	0.299697	FALSE	TRUE	FALSE
		ENSMUSG00000008373	0.269412	-0.1232	FALSE	FALSE	FALSE
		ENSMUSG00000008384	0.597619	-0.687338	FALSE	TRUE	FALSE
		ENSMUSG00000008393	0.549373	-0.5363	FALSE	TRUE	FALSE
		ENSMUSG00000008398	0.534733	-0.390634	TRUE	TRUE	TRUE
		ENSMUSG00000008435	-0.421499	0.0899066	FALSE	FALSE	FALSE
		ENSMUSG00000008475	0.545461	-0.503802	TRUE	TRUE	TRUE
		ENSMUSG00000008575	-0.509548	0.30075	FALSE	TRUE	FALSE
		ENSMUSG00000008604	-0.240989	0.284627	FALSE	TRUE	FALSE
		ENSMUSG00000008658	-0.358404	0.36437	TRUE	TRUE	TRUE
		ENSMUSG00000008668	0.492756	-0.54064	FALSE	TRUE	FALSE
		ENSMUSG00000008682	0.501097	-0.471598	FALSE	TRUE	FALSE
		ENSMUSG00000008683	0.470114	-0.610198	FALSE	TRUE	FALSE
		ENSMUSG00000008690	0.186138	-0.0831002	FALSE	FALSE	FALSE
		ENSMUSG00000008730	-0.195826	0.126543	FALSE	FALSE	FALSE
		ENSMUSG00000008734	0.512713	-0.376229	FALSE	TRUE	FALSE
		ENSMUSG00000008822	0.303313	-0.328538	FALSE	TRUE	FALSE
		ENSMUSG00000008845	0.337352	-0.392209	FALSE	FALSE	FALSE
		ENSMUSG00000008855	0.230535	0.0464177	TRUE	FALSE	FALSE
		ENSMUSG00000008976	-0.297901	0.229761	TRUE	TRUE	TRUE
		ENSMUSG00000009013	0.527903	-0.609391	FALSE	TRUE	FALSE
		ENSMUSG00000009073	-0.241618	0.22925	TRUE	TRUE	TRUE
		ENSMUSG00000009090	-0.437822	0.414432	FALSE	TRUE	FALSE
		ENSMUSG00000009112	-0.191187	0.229561	FALSE	FALSE	FALSE
		ENSMUSG00000009207	-0.455264	0.265942	TRUE	TRUE	TRUE
		ENSMUSG00000009281	0.608492	-0.6572	TRUE	TRUE	TRUE
		ENSMUSG00000009292	0.330125	-0.788062	FALSE	FALSE	FALSE
		ENSMUSG00000009406	-0.225168	0.247337	FALSE	TRUE	FALSE
		ENSMUSG00000009470	-0.248879	0.24843	FALSE	FALSE	FALSE
		ENSMUSG00000009545	-0.311704	0.460985	TRUE	TRUE	TRUE
		ENSMUSG00000009549	0.162776	-0.286252	FALSE	FALSE	FALSE
		ENSMUSG00000009555	0.243774	-0.168883	TRUE	FALSE	FALSE
		ENSMUSG00000009563	0.352866	-0.327272	FALSE	TRUE	FALSE
		ENSMUSG00000009575	-0.22385	0.196941	FALSE	TRUE	FALSE
		ENSMUSG00000009621	-0.369204	0.323042	FALSE	TRUE	FALSE
		ENSMUSG00000009630	0.194116	-0.115461	FALSE	FALSE	FALSE
		ENSMUSG00000009633	0.751323	-0.493851	FALSE	TRUE	FALSE
		ENSMUSG00000009647	-0.238392	0.241042	FALSE	TRUE	FALSE
		ENSMUSG00000009687	0.489633	-0.701802	FALSE	TRUE	FALSE
		ENSMUSG00000009772	0.471101	-0.299119	FALSE	FALSE	FALSE
		ENSMUSG00000009876	0.815101	-0.505182	FALSE	TRUE	FALSE
		ENSMUSG00000009927	0.508182	-0.619181	FALSE	TRUE	FALSE
		ENSMUSG00000010025	0.207712	-0.176302	FALSE	TRUE	FALSE
		ENSMUSG00000010064	-0.498444	0.231153	FALSE	FALSE	FALSE
		ENSMUSG00000010066	-0.914286	0.817995	TRUE	TRUE	TRUE
		ENSMUSG00000010067	0.519465	-0.470308	FALSE	TRUE	FALSE
		ENSMUSG00000010080	-0.644804	0.465619	FALSE	TRUE	FALSE
		ENSMUSG00000010097	0.11636	-0.216452	FALSE	FALSE	FALSE
		ENSMUSG00000010122	-0.368143	0.185588	FALSE	FALSE	FALSE
		ENSMUSG00000010175	-0.681086	0.622394	TRUE	TRUE	TRUE
		ENSMUSG00000010205	-0.186786	0.305626	FALSE	FALSE	FALSE
		ENSMUSG00000010277	-0.290611	0.320749	FALSE	TRUE	FALSE
		ENSMUSG00000010290	-0.271577	0.188887	FALSE	FALSE	FALSE
		ENSMUSG00000010307	0.613033	-0.238841	FALSE	FALSE	FALSE
		ENSMUSG00000010358	0.423319	-0.402964	FALSE	TRUE	FALSE
		ENSMUSG00000010376	0.277384	-0.250389	FALSE	TRUE	FALSE
		ENSMUSG00000010406	0.244417	-0.256872	FALSE	FALSE	FALSE
		ENSMUSG00000010453	-0.215092	0.260995	FALSE	TRUE	FALSE
		ENSMUSG00000010538	0.596261	-0.438515	FALSE	TRUE	FALSE
		ENSMUSG00000010554	-0.291524	0.216147	FALSE	FALSE	FALSE
		ENSMUSG00000010607	0.358563	-0.411042	FALSE	TRUE	FALSE
		ENSMUSG00000010608	-0.369744	0.217868	FALSE	TRUE	FALSE
		ENSMUSG00000010830	0.500961	-0.481877	FALSE	FALSE	FALSE
		ENSMUSG00000010914	-0.302728	0.195925	FALSE	FALSE	FALSE
		ENSMUSG00000011034	-0.820507	0.725104	TRUE	TRUE	TRUE
		ENSMUSG00000011114	0.340226	-0.235041	FALSE	TRUE	FALSE
		ENSMUSG00000011256	-0.775717	0.712946	FALSE	TRUE	FALSE
		ENSMUSG00000011257	-0.211858	0.207947	FALSE	TRUE	FALSE
		ENSMUSG00000011382	-0.313458	0.3621	FALSE	TRUE	FALSE
		ENSMUSG00000011752	-0.332515	0.0370509	FALSE	FALSE	FALSE
		ENSMUSG00000011832	-0.162169	0.25842	FALSE	FALSE	FALSE
		ENSMUSG00000012117	-0.326555	0.243158	FALSE	TRUE	FALSE
		ENSMUSG00000012405	0.401862	-0.40573	FALSE	TRUE	FALSE
		ENSMUSG00000012422	0.285975	-0.367844	FALSE	TRUE	FALSE
		ENSMUSG00000012428	0.339278	-0.318424	FALSE	TRUE	FALSE
		ENSMUSG00000012483	0.407356	-0.530992	FALSE	TRUE	FALSE
		ENSMUSG00000012609	-0.102215	0.211032	FALSE	FALSE	FALSE
		ENSMUSG00000012848	0.547803	-0.522844	FALSE	TRUE	FALSE
		ENSMUSG00000013033	-0.742936	0.323031	FALSE	TRUE	FALSE
		ENSMUSG00000013089	-0.37651	0.0718542	TRUE	FALSE	FALSE
		ENSMUSG00000013236	-0.322971	0.476051	TRUE	TRUE	TRUE
		ENSMUSG00000013275	-0.0594124	0.235764	FALSE	FALSE	FALSE
		ENSMUSG00000013419	-0.207702	0.218031	FALSE	FALSE	FALSE
		ENSMUSG00000013584	-0.0551509	-0.489904	TRUE	FALSE	FALSE
		ENSMUSG00000013593	-0.24681	0.253325	FALSE	TRUE	FALSE
		ENSMUSG00000013622	0.231274	-0.277643	FALSE	TRUE	FALSE
		ENSMUSG00000013629	-0.334483	0.297686	FALSE	TRUE	FALSE
		ENSMUSG00000013698	0.416199	-0.449782	FALSE	TRUE	FALSE
		ENSMUSG00000013707	0.799945	-0.674613	FALSE	TRUE	FALSE
		ENSMUSG00000013822	0.405215	-0.334062	FALSE	TRUE	FALSE
		ENSMUSG00000013833	-0.185842	0.339194	FALSE	FALSE	FALSE
		ENSMUSG00000013936	0.23975	-0.338625	TRUE	FALSE	FALSE
		ENSMUSG00000014075	0.0865019	-0.342417	FALSE	FALSE	FALSE
		ENSMUSG00000014164	-0.312601	0.548013	FALSE	FALSE	FALSE
		ENSMUSG00000014294	0.340496	-0.396424	FALSE	TRUE	FALSE
		ENSMUSG00000014301	0.200017	-0.27746	FALSE	FALSE	FALSE
		ENSMUSG00000014313	0.372544	-0.484165	FALSE	TRUE	FALSE
		ENSMUSG00000014329	0.326049	-0.0898656	FALSE	FALSE	FALSE
		ENSMUSG00000014349	-0.0993668	0.15556	FALSE	FALSE	FALSE
		ENSMUSG00000014353	-0.21622	0.132114	FALSE	FALSE	FALSE
		ENSMUSG00000014355	-0.200401	0.256372	FALSE	TRUE	FALSE
		ENSMUSG00000014426	-0.353151	0.287133	FALSE	TRUE	FALSE
		ENSMUSG00000014453	-0.72212	0.515737	TRUE	TRUE	TRUE
		ENSMUSG00000014496	-0.220146	0.291677	FALSE	FALSE	FALSE
		ENSMUSG00000014498	-0.488333	0.475757	FALSE	TRUE	FALSE
		ENSMUSG00000014503	-0.276636	0.225927	FALSE	FALSE	FALSE
		ENSMUSG00000014504	0.128058	-0.235118	FALSE	FALSE	FALSE
		ENSMUSG00000014592	-0.346007	0.298585	FALSE	TRUE	FALSE
		ENSMUSG00000014601	-0.212873	0.217443	FALSE	TRUE	FALSE
		ENSMUSG00000014606	-0.202839	0.225287	FALSE	TRUE	FALSE
		ENSMUSG00000014773	0.443922	-0.115463	TRUE	FALSE	FALSE
		ENSMUSG00000014776	-0.148511	0.226962	TRUE	FALSE	FALSE
		ENSMUSG00000014813	0.0334594	-0.69343	TRUE	FALSE	FALSE
		ENSMUSG00000014837	-0.401487	0.449448	FALSE	TRUE	FALSE
		ENSMUSG00000014846	0.630801	-0.796801	FALSE	TRUE	FALSE
		ENSMUSG00000014856	0.229522	-0.356203	FALSE	FALSE	FALSE
		ENSMUSG00000014905	-0.34702	0.228579	FALSE	FALSE	FALSE
		ENSMUSG00000014932	0.327768	-0.305431	TRUE	TRUE	TRUE
		ENSMUSG00000015002	-0.268309	0.202728	FALSE	TRUE	FALSE
		ENSMUSG00000015013	0.384396	-0.347324	FALSE	TRUE	FALSE
		ENSMUSG00000015016	-0.349434	0.379619	FALSE	TRUE	FALSE
		ENSMUSG00000015053	0.584832	-0.479545	TRUE	TRUE	TRUE
		ENSMUSG00000015094	0.378078	-0.253497	FALSE	FALSE	FALSE
		ENSMUSG00000015095	-0.149826	0.178751	FALSE	FALSE	FALSE
		ENSMUSG00000015112	-0.319133	0.269629	FALSE	TRUE	FALSE
		ENSMUSG00000015120	0.229168	-0.174592	FALSE	TRUE	FALSE
		ENSMUSG00000015202	-0.955069	0.678264	FALSE	TRUE	FALSE
		ENSMUSG00000015217	-0.180975	0.0887631	TRUE	FALSE	FALSE
		ENSMUSG00000015224	0.728504	-0.366327	FALSE	FALSE	FALSE
		ENSMUSG00000015247	0.454874	-0.414546	FALSE	TRUE	FALSE
		ENSMUSG00000015289	0.536525	-0.38385	FALSE	TRUE	FALSE
		ENSMUSG00000015340	0.409043	-0.162635	TRUE	FALSE	FALSE
		ENSMUSG00000015342	-0.59556	0.44201	TRUE	TRUE	TRUE
		ENSMUSG00000015354	0.172118	-0.366821	FALSE	FALSE	FALSE
		ENSMUSG00000015355	0.577781	-0.503649	FALSE	TRUE	FALSE
		ENSMUSG00000015357	-0.168333	0.222454	FALSE	FALSE	FALSE
		ENSMUSG00000015396	0.744482	-0.833423	TRUE	TRUE	TRUE
		ENSMUSG00000015405	0.513126	-0.501737	TRUE	FALSE	FALSE
		ENSMUSG00000015467	0.847534	-0.688881	FALSE	TRUE	FALSE
		ENSMUSG00000015468	0.243081	-0.319979	TRUE	TRUE	TRUE
		ENSMUSG00000015488	-0.204261	0.269372	FALSE	FALSE	FALSE
		ENSMUSG00000015522	-0.166887	0.256692	FALSE	FALSE	FALSE
		ENSMUSG00000015536	0.0487587	-0.333047	FALSE	FALSE	FALSE
		ENSMUSG00000015568	-0.484617	0.422269	FALSE	TRUE	FALSE
		ENSMUSG00000015575	0.326184	-0.377693	FALSE	TRUE	FALSE
		ENSMUSG00000015579	-0.0959937	0.303415	TRUE	FALSE	FALSE
		ENSMUSG00000015597	-0.399998	0.301693	FALSE	TRUE	FALSE
		ENSMUSG00000015647	-0.31802	0.536724	TRUE	FALSE	FALSE
		ENSMUSG00000015659	-0.708471	0.568027	FALSE	TRUE	FALSE
		ENSMUSG00000015668	0.247117	-0.20358	FALSE	FALSE	FALSE
		ENSMUSG00000015671	0.128974	-0.223502	FALSE	FALSE	FALSE
		ENSMUSG00000015672	0.263535	-0.375657	FALSE	TRUE	FALSE
		ENSMUSG00000015697	-0.286418	0.139299	FALSE	FALSE	FALSE
		ENSMUSG00000015711	-0.260105	0.384825	FALSE	TRUE	FALSE
		ENSMUSG00000015714	0.177295	-0.161146	TRUE	FALSE	FALSE
		ENSMUSG00000015721	-2.38218	0.37726	FALSE	FALSE	FALSE
		ENSMUSG00000015745	0.306439	-0.202387	TRUE	FALSE	FALSE
		ENSMUSG00000015749	-0.293827	0.176362	FALSE	FALSE	FALSE
		ENSMUSG00000015755	-0.0135567	0.131251	FALSE	FALSE	FALSE
		ENSMUSG00000015766	0.348754	-0.359771	FALSE	TRUE	FALSE
		ENSMUSG00000015804	0.34941	-0.438513	TRUE	TRUE	TRUE
		ENSMUSG00000015843	-0.241322	0.12815	FALSE	FALSE	FALSE
		ENSMUSG00000015846	-0.154562	0.239931	TRUE	FALSE	FALSE
		ENSMUSG00000015852	0.550142	-0.543142	FALSE	TRUE	FALSE
		ENSMUSG00000015932	0.248486	-0.308096	FALSE	FALSE	FALSE
		ENSMUSG00000015944	-0.0976721	0.301712	FALSE	FALSE	FALSE
		ENSMUSG00000015947	0.86812	-0.446777	FALSE	FALSE	FALSE
		ENSMUSG00000015950	0.120463	-0.57942	TRUE	FALSE	FALSE
		ENSMUSG00000015961	0.228234	-0.3913	FALSE	FALSE	FALSE
		ENSMUSG00000015968	-0.756554	0.21608	TRUE	FALSE	FALSE
		ENSMUSG00000015980	0.797651	-0.098912	FALSE	FALSE	FALSE
		ENSMUSG00000016028	-0.493302	0.608978	TRUE	TRUE	TRUE
		ENSMUSG00000016087	0.553574	-0.389152	TRUE	TRUE	TRUE
		ENSMUSG00000016181	-0.250538	0.209521	FALSE	FALSE	FALSE
		ENSMUSG00000016194	0.374686	-0.369304	FALSE	TRUE	FALSE
		ENSMUSG00000016206	0.599953	-0.516178	TRUE	TRUE	TRUE
		ENSMUSG00000016239	-1.18657	0.746967	FALSE	FALSE	FALSE
		ENSMUSG00000016252	0.327053	-0.398227	FALSE	TRUE	FALSE
		ENSMUSG00000016256	0.488028	-0.490224	TRUE	TRUE	TRUE
		ENSMUSG00000016319	0.159735	-0.226328	FALSE	FALSE	FALSE
		ENSMUSG00000016349	-0.385533	0.350483	FALSE	TRUE	FALSE
		ENSMUSG00000016382	0.24617	-0.437378	FALSE	FALSE	FALSE
		ENSMUSG00000016386	-0.301292	0.324912	FALSE	TRUE	FALSE
		ENSMUSG00000016409	-0.279054	0.205627	TRUE	TRUE	TRUE
		ENSMUSG00000016427	0.212113	-0.282433	FALSE	FALSE	FALSE
		ENSMUSG00000016458	0.0625527	-0.409266	TRUE	FALSE	FALSE
		ENSMUSG00000016477	-0.305337	0.347339	TRUE	TRUE	TRUE
		ENSMUSG00000016494	0.625635	-0.5657	TRUE	TRUE	TRUE
		ENSMUSG00000016495	0.139515	-0.238429	TRUE	FALSE	FALSE
		ENSMUSG00000016503	0.335225	-0.284096	FALSE	TRUE	FALSE
		ENSMUSG00000016541	-0.161434	0.168495	FALSE	TRUE	FALSE
		ENSMUSG00000016559	0.460938	-0.438656	TRUE	TRUE	TRUE
		ENSMUSG00000016664	-0.492002	0.428166	FALSE	TRUE	FALSE
		ENSMUSG00000016833	0.257308	-0.367418	FALSE	TRUE	FALSE
		ENSMUSG00000016918	0.226549	-0.335108	TRUE	FALSE	FALSE
		ENSMUSG00000017167	-0.551958	0.203276	FALSE	FALSE	FALSE
		ENSMUSG00000017188	0.0740127	-0.194036	FALSE	FALSE	FALSE
		ENSMUSG00000017288	-0.234139	0.231235	FALSE	TRUE	FALSE
		ENSMUSG00000017291	-0.431191	0.312732	FALSE	TRUE	FALSE
		ENSMUSG00000017309	0.633166	-0.419329	FALSE	TRUE	FALSE
		ENSMUSG00000017344	0.52787	-0.563659	TRUE	TRUE	TRUE
		ENSMUSG00000017376	-0.281894	0.164155	FALSE	TRUE	FALSE
		ENSMUSG00000017386	0.488537	-0.178035	FALSE	FALSE	FALSE
		ENSMUSG00000017404	0.327089	-0.314222	FALSE	TRUE	FALSE
		ENSMUSG00000017417	0.490931	-0.211699	FALSE	FALSE	FALSE
		ENSMUSG00000017428	-0.181368	0.253576	FALSE	FALSE	FALSE
		ENSMUSG00000017446	0.560549	-0.357004	TRUE	FALSE	FALSE
		ENSMUSG00000017453	-1.30011	0.673758	FALSE	FALSE	FALSE
		ENSMUSG00000017485	-0.209064	0.0956115	FALSE	FALSE	FALSE
		ENSMUSG00000017493	0.430645	-0.361103	FALSE	TRUE	FALSE
		ENSMUSG00000017548	-0.291849	0.221198	FALSE	TRUE	FALSE
		ENSMUSG00000017652	0.367781	-0.442222	TRUE	FALSE	FALSE
		ENSMUSG00000017677	0.298674	-0.340299	FALSE	FALSE	FALSE
		ENSMUSG00000017679	-0.401621	0.0405854	FALSE	FALSE	FALSE
		ENSMUSG00000017686	-0.303252	0.269467	FALSE	TRUE	FALSE
		ENSMUSG00000017692	-0.439629	0.262533	FALSE	TRUE	FALSE
		ENSMUSG00000017697	0.965729	-0.747625	TRUE	FALSE	FALSE
		ENSMUSG00000017707	0.29308	-0.263987	FALSE	TRUE	FALSE
		ENSMUSG00000017734	0.398255	-0.460655	FALSE	TRUE	FALSE
		ENSMUSG00000017740	-0.70941	0.381243	FALSE	FALSE	FALSE
		ENSMUSG00000017747	-0.317173	0.335136	FALSE	TRUE	FALSE
		ENSMUSG00000017754	0.528881	-0.434541	FALSE	TRUE	FALSE
		ENSMUSG00000017756	-0.478565	0.591667	FALSE	TRUE	FALSE
		ENSMUSG00000017778	0.39152	-0.472015	FALSE	TRUE	FALSE
		ENSMUSG00000017801	0.235104	-0.226754	FALSE	FALSE	FALSE
		ENSMUSG00000017817	-0.370827	0.370228	TRUE	TRUE	TRUE
		ENSMUSG00000017837	-0.118307	0.174474	FALSE	FALSE	FALSE
		ENSMUSG00000017843	-0.158534	0.123811	FALSE	FALSE	FALSE
		ENSMUSG00000017858	-0.169623	0.206164	TRUE	FALSE	FALSE
		ENSMUSG00000017969	0.337856	-0.459294	TRUE	FALSE	FALSE
		ENSMUSG00000018008	0.473526	-0.381164	FALSE	FALSE	FALSE
		ENSMUSG00000018040	0.212072	-0.198261	FALSE	FALSE	FALSE
		ENSMUSG00000018042	0.478238	-0.290275	FALSE	TRUE	FALSE
		ENSMUSG00000018068	-0.32462	0.102193	FALSE	FALSE	FALSE
		ENSMUSG00000018076	-0.13925	0.275325	FALSE	FALSE	FALSE
		ENSMUSG00000018166	-0.126832	0.43564	TRUE	FALSE	FALSE
		ENSMUSG00000018167	0.389839	-0.125809	FALSE	FALSE	FALSE
		ENSMUSG00000018169	0.620537	-0.456747	FALSE	TRUE	FALSE
		ENSMUSG00000018217	0.259022	-0.450869	TRUE	FALSE	FALSE
		ENSMUSG00000018239	0.262505	-0.344907	FALSE	FALSE	FALSE
		ENSMUSG00000018263	0.0245336	0.334376	TRUE	FALSE	FALSE
		ENSMUSG00000018379	-0.0581646	-0.218912	TRUE	FALSE	FALSE
		ENSMUSG00000018381	0.514909	-0.402561	FALSE	TRUE	FALSE
		ENSMUSG00000018401	-0.644514	0.283255	FALSE	TRUE	FALSE
		ENSMUSG00000018411	-0.444301	0.396534	FALSE	TRUE	FALSE
		ENSMUSG00000018412	-0.105422	0.169892	FALSE	FALSE	FALSE
		ENSMUSG00000018415	-0.157585	0.238134	FALSE	FALSE	FALSE
		ENSMUSG00000018417	0.180397	-0.250784	FALSE	FALSE	FALSE
		ENSMUSG00000018427	-1.02798	0.65247	FALSE	FALSE	FALSE
		ENSMUSG00000018428	-0.345202	0.395327	TRUE	TRUE	TRUE
		ENSMUSG00000018446	-0.175173	0.140079	FALSE	TRUE	FALSE
		ENSMUSG00000018449	0.436671	-0.448991	FALSE	TRUE	FALSE
		ENSMUSG00000018481	-0.201787	0.196535	FALSE	FALSE	FALSE
		ENSMUSG00000018501	-0.303594	0.356238	TRUE	TRUE	TRUE
		ENSMUSG00000018507	0.626081	-0.293659	FALSE	FALSE	FALSE
		ENSMUSG00000018509	0.317793	-0.058593	FALSE	FALSE	FALSE
		ENSMUSG00000018547	-0.241251	0.282192	FALSE	TRUE	FALSE
		ENSMUSG00000018548	0.348218	-0.153851	FALSE	FALSE	FALSE
		ENSMUSG00000018566	-0.220984	0.275076	FALSE	FALSE	FALSE
		ENSMUSG00000018567	0.282982	-0.206377	FALSE	TRUE	FALSE
		ENSMUSG00000018572	0.396622	-0.1865	FALSE	FALSE	FALSE
		ENSMUSG00000018583	-0.273833	0.221018	FALSE	TRUE	FALSE
		ENSMUSG00000018585	0.575462	-0.457692	FALSE	TRUE	FALSE
		ENSMUSG00000018593	0.705599	-0.637473	TRUE	TRUE	TRUE
		ENSMUSG00000018604	0.497381	-0.447429	TRUE	TRUE	TRUE
		ENSMUSG00000018669	0.223224	-0.0385291	TRUE	FALSE	FALSE
		ENSMUSG00000018672	0.3213	-0.22738	FALSE	TRUE	FALSE
		ENSMUSG00000018707	-0.377592	0.29355	FALSE	TRUE	FALSE
		ENSMUSG00000018727	-1.28788	0.450674	FALSE	FALSE	FALSE
		ENSMUSG00000018752	0.656569	-0.414312	FALSE	TRUE	FALSE
		ENSMUSG00000018761	0.327632	-0.183821	FALSE	FALSE	FALSE
		ENSMUSG00000018765	0.0273661	0.20311	FALSE	FALSE	FALSE
		ENSMUSG00000018774	0.621458	-0.67342	FALSE	TRUE	FALSE
		ENSMUSG00000018796	-0.340867	0.367635	FALSE	TRUE	FALSE
		ENSMUSG00000018800	-0.334805	0.399915	FALSE	FALSE	FALSE
		ENSMUSG00000018819	0.464201	-0.404038	FALSE	TRUE	FALSE
		ENSMUSG00000018830	0.696837	-0.64034	TRUE	TRUE	TRUE
		ENSMUSG00000018899	0.727632	-0.566302	TRUE	TRUE	TRUE
		ENSMUSG00000018906	-0.520209	0.0997107	FALSE	FALSE	FALSE
		ENSMUSG00000018920	0.443759	-0.491971	FALSE	TRUE	FALSE
		ENSMUSG00000018921	-0.204704	0.300598	FALSE	FALSE	FALSE
		ENSMUSG00000018923	0.35292	-0.353987	FALSE	TRUE	FALSE
		ENSMUSG00000018927	0.7312	-1.26036	FALSE	FALSE	FALSE
		ENSMUSG00000018931	-0.100025	0.24881	FALSE	FALSE	FALSE
		ENSMUSG00000018986	0.621247	-0.623001	FALSE	TRUE	FALSE
		ENSMUSG00000018995	-0.313715	0.224755	FALSE	TRUE	FALSE
		ENSMUSG00000019054	0.157679	-0.216261	FALSE	FALSE	FALSE
		ENSMUSG00000019088	0.327154	-0.0839151	FALSE	FALSE	FALSE
		ENSMUSG00000019122	0.45775	-1.26596	FALSE	FALSE	FALSE
		ENSMUSG00000019124	0.477657	-0.204619	FALSE	FALSE	FALSE
		ENSMUSG00000019132	-0.253254	0.220129	FALSE	TRUE	FALSE
		ENSMUSG00000019143	-0.258938	0.262727	FALSE	TRUE	FALSE
		ENSMUSG00000019158	0.36597	-0.175304	FALSE	FALSE	FALSE
		ENSMUSG00000019173	0.469812	-0.427421	FALSE	TRUE	FALSE
		ENSMUSG00000019194	-0.50791	0.167136	TRUE	FALSE	FALSE
		ENSMUSG00000019254	0.244293	-0.161701	FALSE	TRUE	FALSE
		ENSMUSG00000019256	0.52239	-0.014967	TRUE	FALSE	FALSE
		ENSMUSG00000019278	0.334545	-0.472875	FALSE	FALSE	FALSE
		ENSMUSG00000019302	-0.599763	0.572292	FALSE	TRUE	FALSE
		ENSMUSG00000019338	-0.0273833	0.241227	FALSE	FALSE	FALSE
		ENSMUSG00000019362	0.265499	-0.224159	FALSE	TRUE	FALSE
		ENSMUSG00000019370	0.233951	-0.029289	FALSE	FALSE	FALSE
		ENSMUSG00000019428	0.197493	-0.0884337	FALSE	FALSE	FALSE
		ENSMUSG00000019505	0.253725	-0.177296	FALSE	FALSE	FALSE
		ENSMUSG00000019539	0.569497	-0.457887	FALSE	TRUE	FALSE
		ENSMUSG00000019558	-0.458792	0.352138	FALSE	TRUE	FALSE
		ENSMUSG00000019578	0.294096	-0.217816	FALSE	TRUE	FALSE
		ENSMUSG00000019579	0.240148	-0.23715	TRUE	TRUE	TRUE
		ENSMUSG00000019647	0.460991	-0.177074	TRUE	FALSE	FALSE
		ENSMUSG00000019659	0.388988	-0.234165	FALSE	TRUE	FALSE
		ENSMUSG00000019689	0.239676	-0.252117	FALSE	TRUE	FALSE
		ENSMUSG00000019699	0.404088	-0.300154	TRUE	TRUE	TRUE
		ENSMUSG00000019710	0.151588	-0.198013	FALSE	FALSE	FALSE
		ENSMUSG00000019731	-0.230723	0.241144	FALSE	TRUE	FALSE
		ENSMUSG00000019738	0.340649	-0.322606	FALSE	TRUE	FALSE
		ENSMUSG00000019773	0.471396	-0.751138	FALSE	FALSE	FALSE
		ENSMUSG00000019782	0.276869	-0.286622	FALSE	TRUE	FALSE
		ENSMUSG00000019787	0.105485	-0.243751	TRUE	FALSE	FALSE
		ENSMUSG00000019791	0.1888	-0.200239	FALSE	FALSE	FALSE
		ENSMUSG00000019796	-0.524414	0.253212	FALSE	FALSE	FALSE
		ENSMUSG00000019797	0.134426	-0.235115	FALSE	FALSE	FALSE
		ENSMUSG00000019818	-0.205019	0.116567	TRUE	FALSE	FALSE
		ENSMUSG00000019828	-0.72691	0.641807	FALSE	TRUE	FALSE
		ENSMUSG00000019838	-0.631776	0.477107	FALSE	TRUE	FALSE
		ENSMUSG00000019849	-0.181441	0.187203	FALSE	FALSE	FALSE
		ENSMUSG00000019850	0.553897	-0.343599	TRUE	FALSE	FALSE
		ENSMUSG00000019853	1.37281	-0.288961	FALSE	FALSE	FALSE
		ENSMUSG00000019857	0.141851	-0.2352	TRUE	FALSE	FALSE
		ENSMUSG00000019864	-0.376204	0.29203	FALSE	TRUE	FALSE
		ENSMUSG00000019866	0.375034	-0.166106	FALSE	FALSE	FALSE
		ENSMUSG00000019868	0.217774	-0.179109	FALSE	TRUE	FALSE
		ENSMUSG00000019872	0.243604	-0.151324	FALSE	FALSE	FALSE
		ENSMUSG00000019874	1.1918	-0.728549	FALSE	FALSE	FALSE
		ENSMUSG00000019876	-0.543952	0.297223	FALSE	FALSE	FALSE
		ENSMUSG00000019890	0.644745	-0.900986	TRUE	FALSE	FALSE
		ENSMUSG00000019899	-0.208637	0.230463	FALSE	TRUE	FALSE
		ENSMUSG00000019906	0.343396	-0.434615	FALSE	FALSE	FALSE
		ENSMUSG00000019907	-0.433796	0.323334	FALSE	TRUE	FALSE
		ENSMUSG00000019927	-0.244562	0.224973	FALSE	TRUE	FALSE
		ENSMUSG00000019929	0.426478	-0.475213	TRUE	TRUE	TRUE
		ENSMUSG00000019942	0.820664	-0.506919	TRUE	FALSE	FALSE
		ENSMUSG00000019944	-0.381271	0.453034	FALSE	TRUE	FALSE
		ENSMUSG00000019947	-0.411654	0.344484	TRUE	TRUE	TRUE
		ENSMUSG00000019951	-0.4335	0.224094	FALSE	TRUE	FALSE
		ENSMUSG00000019960	0.434583	-0.571921	TRUE	TRUE	TRUE
		ENSMUSG00000019966	0.182188	-0.37957	TRUE	FALSE	FALSE
		ENSMUSG00000019970	0.43238	-0.887264	FALSE	TRUE	FALSE
		ENSMUSG00000019975	0.186813	-0.280999	FALSE	FALSE	FALSE
		ENSMUSG00000019977	-0.0665417	0.191067	FALSE	FALSE	FALSE
		ENSMUSG00000019978	0.400126	-0.310357	TRUE	TRUE	TRUE
		ENSMUSG00000019989	0.829803	-0.5811	FALSE	TRUE	FALSE
		ENSMUSG00000019996	-0.301865	0.398008	FALSE	TRUE	FALSE
		ENSMUSG00000019997	-0.380523	0.204968	TRUE	FALSE	FALSE
		ENSMUSG00000020009	0.386022	-0.385609	FALSE	TRUE	FALSE
		ENSMUSG00000020015	0.169786	-0.238739	FALSE	FALSE	FALSE
		ENSMUSG00000020021	-0.254046	0.244035	FALSE	FALSE	FALSE
		ENSMUSG00000020022	0.315439	-0.19084	FALSE	TRUE	FALSE
		ENSMUSG00000020029	-0.0810336	0.188112	FALSE	FALSE	FALSE
		ENSMUSG00000020032	-0.45788	0.199305	FALSE	FALSE	FALSE
		ENSMUSG00000020038	-0.64792	0.462195	FALSE	FALSE	FALSE
		ENSMUSG00000020042	-0.652713	0.371593	FALSE	FALSE	FALSE
		ENSMUSG00000020044	0.276396	-0.385002	FALSE	FALSE	FALSE
		ENSMUSG00000020053	0.327159	-0.468035	TRUE	FALSE	FALSE
		ENSMUSG00000020056	0.248973	-0.300033	FALSE	TRUE	FALSE
		ENSMUSG00000020057	0.202448	-0.40396	FALSE	FALSE	FALSE
		ENSMUSG00000020067	-0.665219	0.535086	TRUE	TRUE	TRUE
		ENSMUSG00000020077	0.745733	-0.882841	FALSE	TRUE	FALSE
		ENSMUSG00000020079	-0.282098	0.219807	FALSE	TRUE	FALSE
		ENSMUSG00000020085	-0.185741	0.215784	FALSE	FALSE	FALSE
		ENSMUSG00000020086	0.622481	-0.0395339	FALSE	FALSE	FALSE
		ENSMUSG00000020090	-0.653845	0.184392	FALSE	FALSE	FALSE
		ENSMUSG00000020091	-0.0270835	0.201764	FALSE	FALSE	FALSE
		ENSMUSG00000020092	0.485924	-0.310041	FALSE	TRUE	FALSE
		ENSMUSG00000020099	0.391199	-0.142363	FALSE	FALSE	FALSE
		ENSMUSG00000020101	0.797546	-0.676606	TRUE	TRUE	TRUE
		ENSMUSG00000020102	0.915719	0.0455554	FALSE	FALSE	FALSE
		ENSMUSG00000020105	0.660201	-0.31596	FALSE	FALSE	FALSE
		ENSMUSG00000020114	-0.219732	0.132165	FALSE	FALSE	FALSE
		ENSMUSG00000020120	0.698777	-0.659606	TRUE	TRUE	TRUE
		ENSMUSG00000020132	-0.308618	0.274953	FALSE	TRUE	FALSE
		ENSMUSG00000020135	-0.404322	0.572474	FALSE	FALSE	FALSE
		ENSMUSG00000020137	-0.528644	0.214808	FALSE	FALSE	FALSE
		ENSMUSG00000020151	0.314957	-0.486959	FALSE	FALSE	FALSE
		ENSMUSG00000020155	0.201143	-0.496688	FALSE	FALSE	FALSE
		ENSMUSG00000020156	0.320696	-0.172788	FALSE	FALSE	FALSE
		ENSMUSG00000020160	-0.406422	0.440011	TRUE	TRUE	TRUE
		ENSMUSG00000020163	0.210789	-0.239341	FALSE	TRUE	FALSE
		ENSMUSG00000020167	0.377172	-0.14704	TRUE	FALSE	FALSE
		ENSMUSG00000020169	-1.09207	0.682844	FALSE	TRUE	FALSE
		ENSMUSG00000020170	-0.382594	0.445698	TRUE	TRUE	TRUE
		ENSMUSG00000020176	-0.298097	0.324127	TRUE	TRUE	TRUE
		ENSMUSG00000020178	0.803879	-0.40037	TRUE	TRUE	TRUE
		ENSMUSG00000020184	-0.324697	0.20466	TRUE	TRUE	TRUE
		ENSMUSG00000020186	0.656022	-0.557155	TRUE	TRUE	TRUE
		ENSMUSG00000020189	-0.504355	0.486876	FALSE	TRUE	FALSE
		ENSMUSG00000020198	-0.25642	0.263747	TRUE	TRUE	TRUE
		ENSMUSG00000020211	-0.286415	0.377827	FALSE	TRUE	FALSE
		ENSMUSG00000020219	0.191477	-0.0742746	FALSE	FALSE	FALSE
		ENSMUSG00000020220	-0.451475	0.383208	FALSE	TRUE	FALSE
		ENSMUSG00000020224	0.437139	-0.396936	FALSE	TRUE	FALSE
		ENSMUSG00000020227	0.523137	-0.472455	FALSE	TRUE	FALSE
		ENSMUSG00000020235	-0.0594963	0.214982	FALSE	FALSE	FALSE
		ENSMUSG00000020238	-0.073447	0.255618	FALSE	FALSE	FALSE
		ENSMUSG00000020250	-0.226173	0.200579	FALSE	TRUE	FALSE
		ENSMUSG00000020253	0.568227	-0.44354	FALSE	TRUE	FALSE
		ENSMUSG00000020255	-0.599125	0.295025	FALSE	TRUE	FALSE
		ENSMUSG00000020256	-0.316844	0.746627	FALSE	FALSE	FALSE
		ENSMUSG00000020261	-0.310117	0.257172	FALSE	TRUE	FALSE
		ENSMUSG00000020263	-0.426897	0.32152	FALSE	TRUE	FALSE
		ENSMUSG00000020264	-0.418794	0.254998	FALSE	FALSE	FALSE
		ENSMUSG00000020267	0.143359	-0.249873	FALSE	FALSE	FALSE
		ENSMUSG00000020271	-0.178717	0.214075	FALSE	TRUE	FALSE
		ENSMUSG00000020272	0.364359	-0.173741	FALSE	FALSE	FALSE
		ENSMUSG00000020277	-0.20521	0.306107	FALSE	FALSE	FALSE
		ENSMUSG00000020290	-0.29567	0.0280298	FALSE	FALSE	FALSE
		ENSMUSG00000020300	-0.761071	0.525822	TRUE	TRUE	TRUE
		ENSMUSG00000020305	0.284649	-0.106494	FALSE	FALSE	FALSE
		ENSMUSG00000020308	0.364809	-0.178785	FALSE	FALSE	FALSE
		ENSMUSG00000020311	-0.232509	0.202883	FALSE	TRUE	FALSE
		ENSMUSG00000020326	-0.232821	0.003802	FALSE	FALSE	FALSE
		ENSMUSG00000020329	-0.336408	0.350681	FALSE	TRUE	FALSE
		ENSMUSG00000020331	-0.709866	0.153111	FALSE	FALSE	FALSE
		ENSMUSG00000020333	-1.03958	0.572008	FALSE	TRUE	FALSE
		ENSMUSG00000020334	-0.570604	0.399046	FALSE	TRUE	FALSE
		ENSMUSG00000020340	-0.499855	0.594152	FALSE	TRUE	FALSE
		ENSMUSG00000020354	-0.420215	0.471833	TRUE	TRUE	TRUE
		ENSMUSG00000020357	0.22894	-0.2918	TRUE	FALSE	FALSE
		ENSMUSG00000020361	-0.414061	0.296522	FALSE	TRUE	FALSE
		ENSMUSG00000020363	0.20499	-0.464825	FALSE	FALSE	FALSE
		ENSMUSG00000020366	-0.186476	0.219055	FALSE	TRUE	FALSE
		ENSMUSG00000020372	0.378631	-0.397491	FALSE	TRUE	FALSE
		ENSMUSG00000020374	1.16083	-0.504083	FALSE	FALSE	FALSE
		ENSMUSG00000020375	-0.0839062	0.23805	FALSE	FALSE	FALSE
		ENSMUSG00000020376	0.333944	-0.273228	FALSE	TRUE	FALSE
		ENSMUSG00000020377	0.848813	-1.04759	FALSE	TRUE	FALSE
		ENSMUSG00000020381	0.690696	-0.30963	FALSE	FALSE	FALSE
		ENSMUSG00000020393	-0.412463	0.384662	TRUE	TRUE	TRUE
		ENSMUSG00000020395	0.487267	-0.364131	FALSE	TRUE	FALSE
		ENSMUSG00000020412	-0.132541	0.219824	FALSE	FALSE	FALSE
		ENSMUSG00000020423	0.647856	-0.670103	TRUE	FALSE	FALSE
		ENSMUSG00000020427	0.526239	-0.472489	TRUE	TRUE	TRUE
		ENSMUSG00000020431	-1.35723	0.359336	FALSE	FALSE	FALSE
		ENSMUSG00000020435	-0.43407	0.473133	FALSE	TRUE	FALSE
		ENSMUSG00000020439	-0.359628	0.256946	TRUE	TRUE	TRUE
		ENSMUSG00000020456	-0.428735	0.504165	FALSE	TRUE	FALSE
		ENSMUSG00000020459	-0.330818	0.167546	FALSE	FALSE	FALSE
		ENSMUSG00000020460	0.470132	-0.543969	FALSE	TRUE	FALSE
		ENSMUSG00000020467	0.624001	-0.435317	FALSE	FALSE	FALSE
		ENSMUSG00000020475	-0.205331	0.0840311	TRUE	FALSE	FALSE
		ENSMUSG00000020477	0.412029	-0.372625	FALSE	TRUE	FALSE
		ENSMUSG00000020483	-0.198205	0.253148	FALSE	FALSE	FALSE
		ENSMUSG00000020485	0.37738	-0.394915	FALSE	TRUE	FALSE
		ENSMUSG00000020486	0.407421	-0.2679	FALSE	TRUE	FALSE
		ENSMUSG00000020519	0.304138	-0.0727561	FALSE	FALSE	FALSE
		ENSMUSG00000020520	0.356248	-0.256612	FALSE	FALSE	FALSE
		ENSMUSG00000020526	0.141888	-0.291869	FALSE	FALSE	FALSE
		ENSMUSG00000020527	-0.42661	0.236574	FALSE	FALSE	FALSE
		ENSMUSG00000020532	-0.38531	0.344899	FALSE	TRUE	FALSE
		ENSMUSG00000020534	-0.240049	0.422593	FALSE	FALSE	FALSE
		ENSMUSG00000020542	-0.750083	0.644193	TRUE	TRUE	TRUE
		ENSMUSG00000020546	-0.34687	0.361357	FALSE	TRUE	FALSE
		ENSMUSG00000020561	0.260642	-0.294167	FALSE	FALSE	FALSE
		ENSMUSG00000020564	-0.246345	0.166258	FALSE	FALSE	FALSE
		ENSMUSG00000020573	0.473037	-0.266213	FALSE	FALSE	FALSE
		ENSMUSG00000020576	-0.283569	0.40622	FALSE	FALSE	FALSE
		ENSMUSG00000020577	0.459656	-0.407148	FALSE	TRUE	FALSE
		ENSMUSG00000020580	-0.421463	0.212666	TRUE	TRUE	TRUE
		ENSMUSG00000020589	0.301173	-0.24136	FALSE	FALSE	FALSE
		ENSMUSG00000020590	-0.28854	0.211317	FALSE	TRUE	FALSE
		ENSMUSG00000020593	-0.588549	0.531923	FALSE	TRUE	FALSE
		ENSMUSG00000020605	-0.225611	0.247632	FALSE	FALSE	FALSE
		ENSMUSG00000020612	-0.332236	0.21991	TRUE	FALSE	FALSE
		ENSMUSG00000020628	-0.251648	0.199495	FALSE	TRUE	FALSE
		ENSMUSG00000020629	-0.260547	0.226344	FALSE	TRUE	FALSE
		ENSMUSG00000020638	0.585299	-0.477431	FALSE	TRUE	FALSE
		ENSMUSG00000020639	-0.790687	0.101724	FALSE	FALSE	FALSE
		ENSMUSG00000020641	0.593752	-0.376647	FALSE	TRUE	FALSE
		ENSMUSG00000020642	0.667901	-0.333994	FALSE	TRUE	FALSE
		ENSMUSG00000020644	0.465436	-0.710258	TRUE	TRUE	TRUE
		ENSMUSG00000020646	-0.425967	0.305174	FALSE	TRUE	FALSE
		ENSMUSG00000020647	-0.502779	0.573159	FALSE	TRUE	FALSE
		ENSMUSG00000020657	-0.18772	0.253428	FALSE	FALSE	FALSE
		ENSMUSG00000020661	-0.317116	0.311542	FALSE	TRUE	FALSE
		ENSMUSG00000020671	-0.351511	0.287027	FALSE	TRUE	FALSE
		ENSMUSG00000020674	0.436171	-0.106216	FALSE	FALSE	FALSE
		ENSMUSG00000020676	1.22756	-0.843457	TRUE	TRUE	TRUE
		ENSMUSG00000020677	0.223789	-0.276364	FALSE	TRUE	FALSE
		ENSMUSG00000020696	0.330302	-0.0646837	FALSE	FALSE	FALSE
		ENSMUSG00000020715	-0.259844	0.455026	TRUE	FALSE	FALSE
		ENSMUSG00000020716	-0.548501	0.440051	TRUE	TRUE	TRUE
		ENSMUSG00000020717	0.457075	-0.421215	TRUE	TRUE	TRUE
[truncated: 4,345 more rows]
