# Supplementary material for: Cannabinoid signaling modulation through JZL184 restores key phenotypes of a mouse model for Williams–Beuren syndrome
Source: eLife journal article supplement (doi:10.7554/elife.72560), 2022-09-01
Supplement: fig6-figsupp1-data1 [file Figure 6-figure supplement 1-source data 1.xlsx]

## Sheet: Figure 6-figure supplement 1
	Figure 6-figure supplement 1
	Row Data
	Coordenates
				WT VEH			WT JZL184			CD VEH			CD JZL184
				PC1	PC2		PC1	PC2		PC1	PC2		PC1	PC2
				-4.19477	-1.56272		1.1234	-2.34339		4.86724	5.51271		-4.89543	1.71206
				-3.4311	-2.72166		7.37544	-2.28085		0.825701	1.75017		-2.82094	0.812153
							2.55248	-2.33156		3.29524	-0.15845		-4.69726	1.61155
