# Supplementary figures and images for: Cannabinoid signaling modulation through JZL184 restores key phenotypes of a mouse model for Williams–Beuren syndrome
Source: eLife journal article supplement (doi:10.7554/elife.72560), 2022-09-01

# Figure 1

a

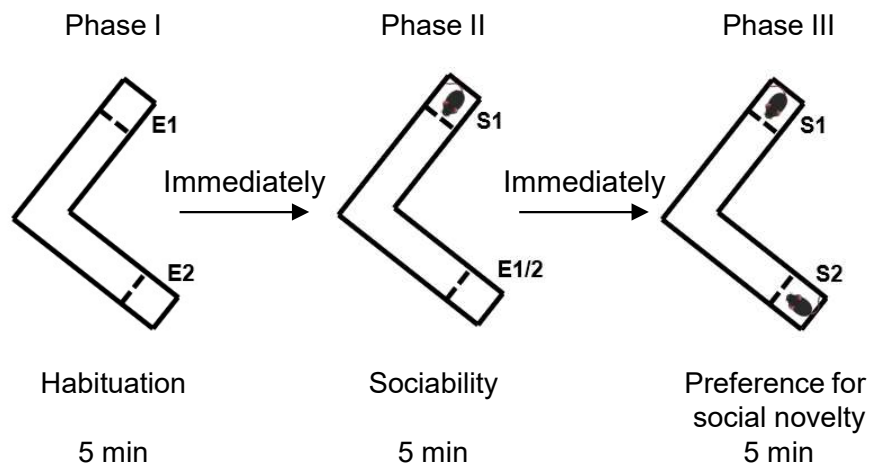

b

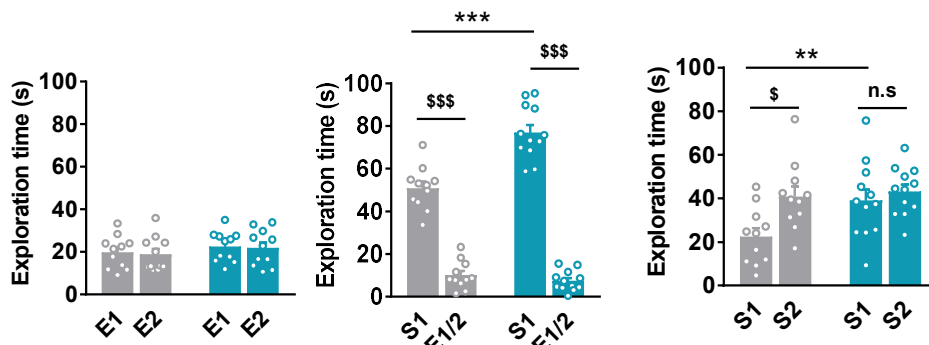

c

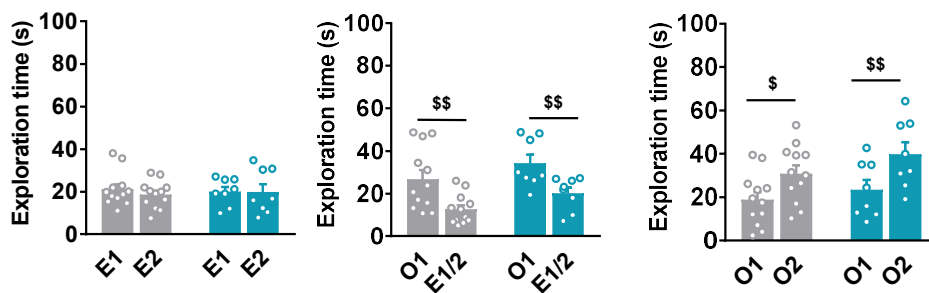

d

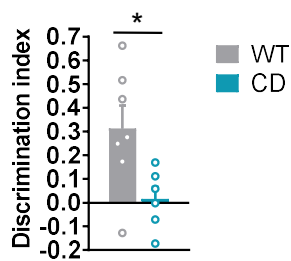

Supplement: fig1-data1 [file elife-72560-fig1-data1-v1.zip]

Figure 1-figure supplement 2

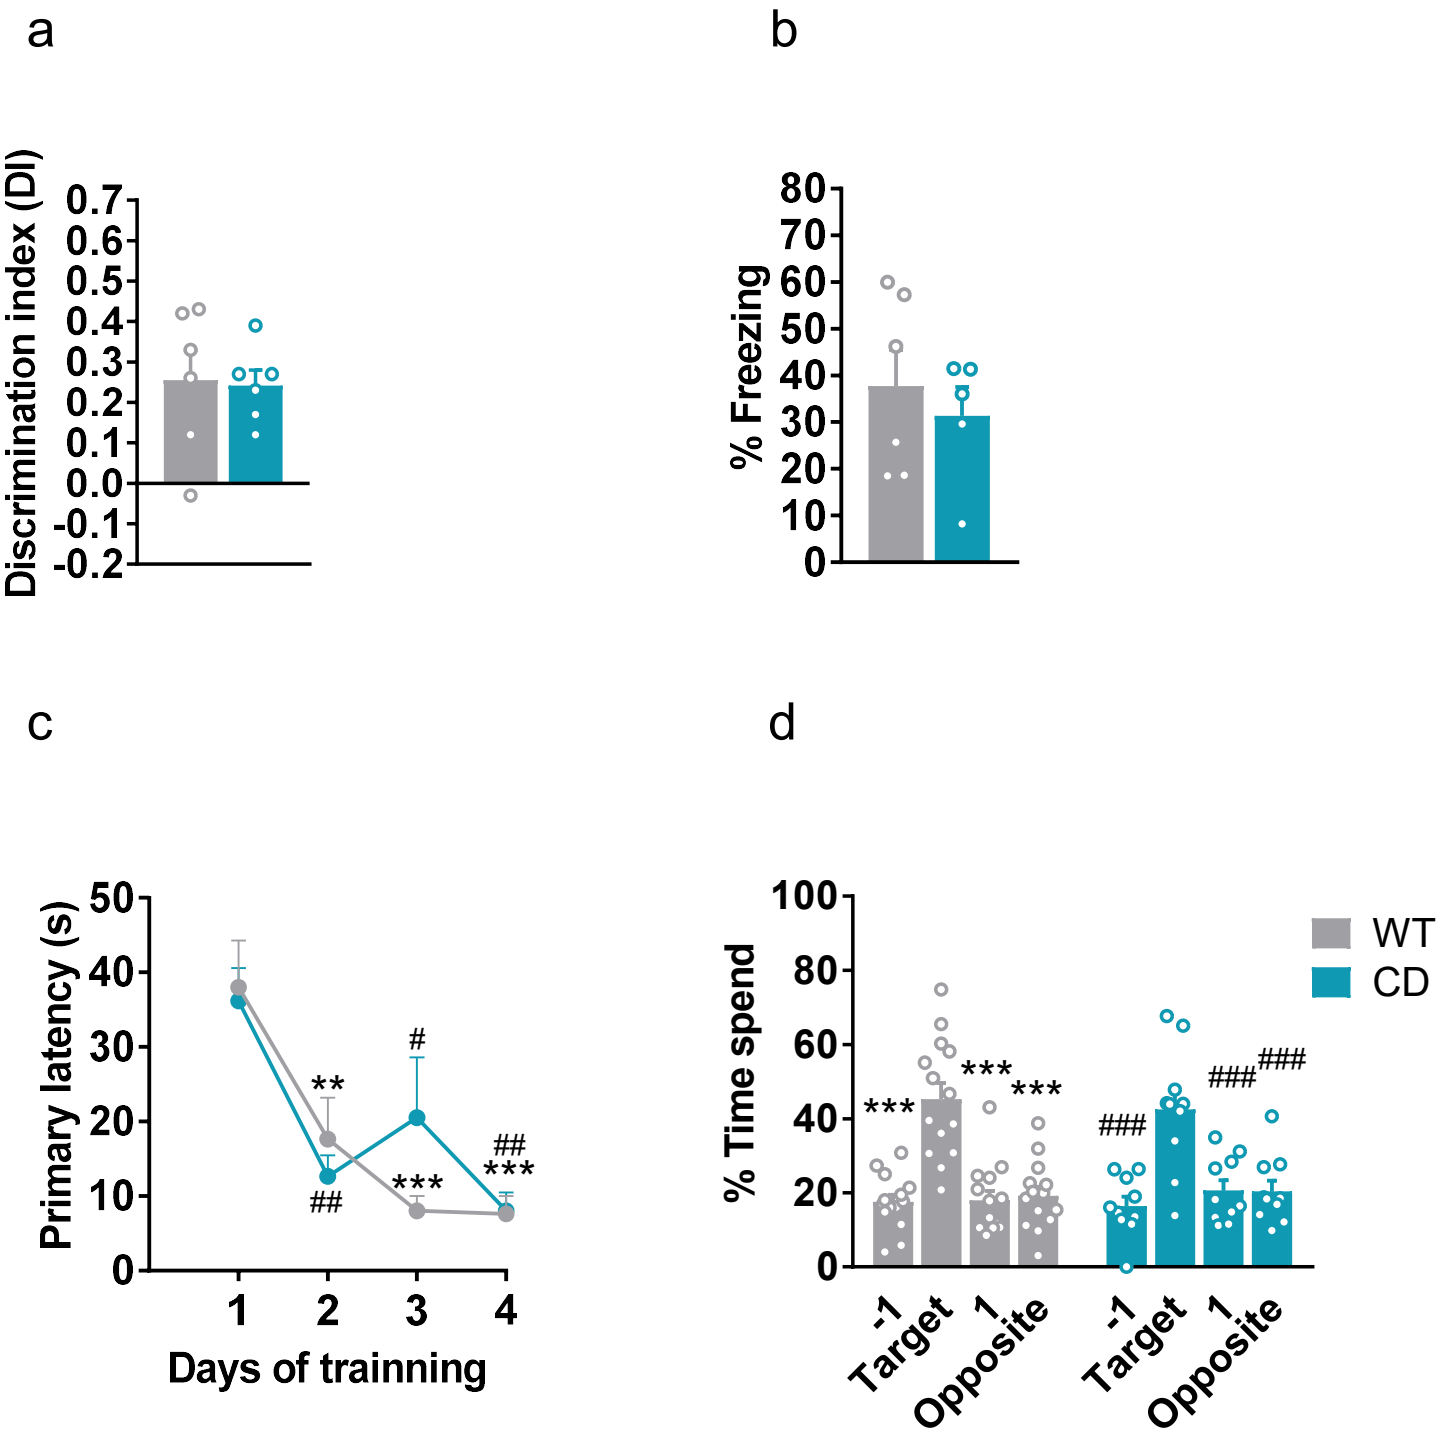

Supplement: fig1-figsupp2-data1 [file elife-72560-fig1-figsupp2-data1-v1.zip]

**Figure 2**

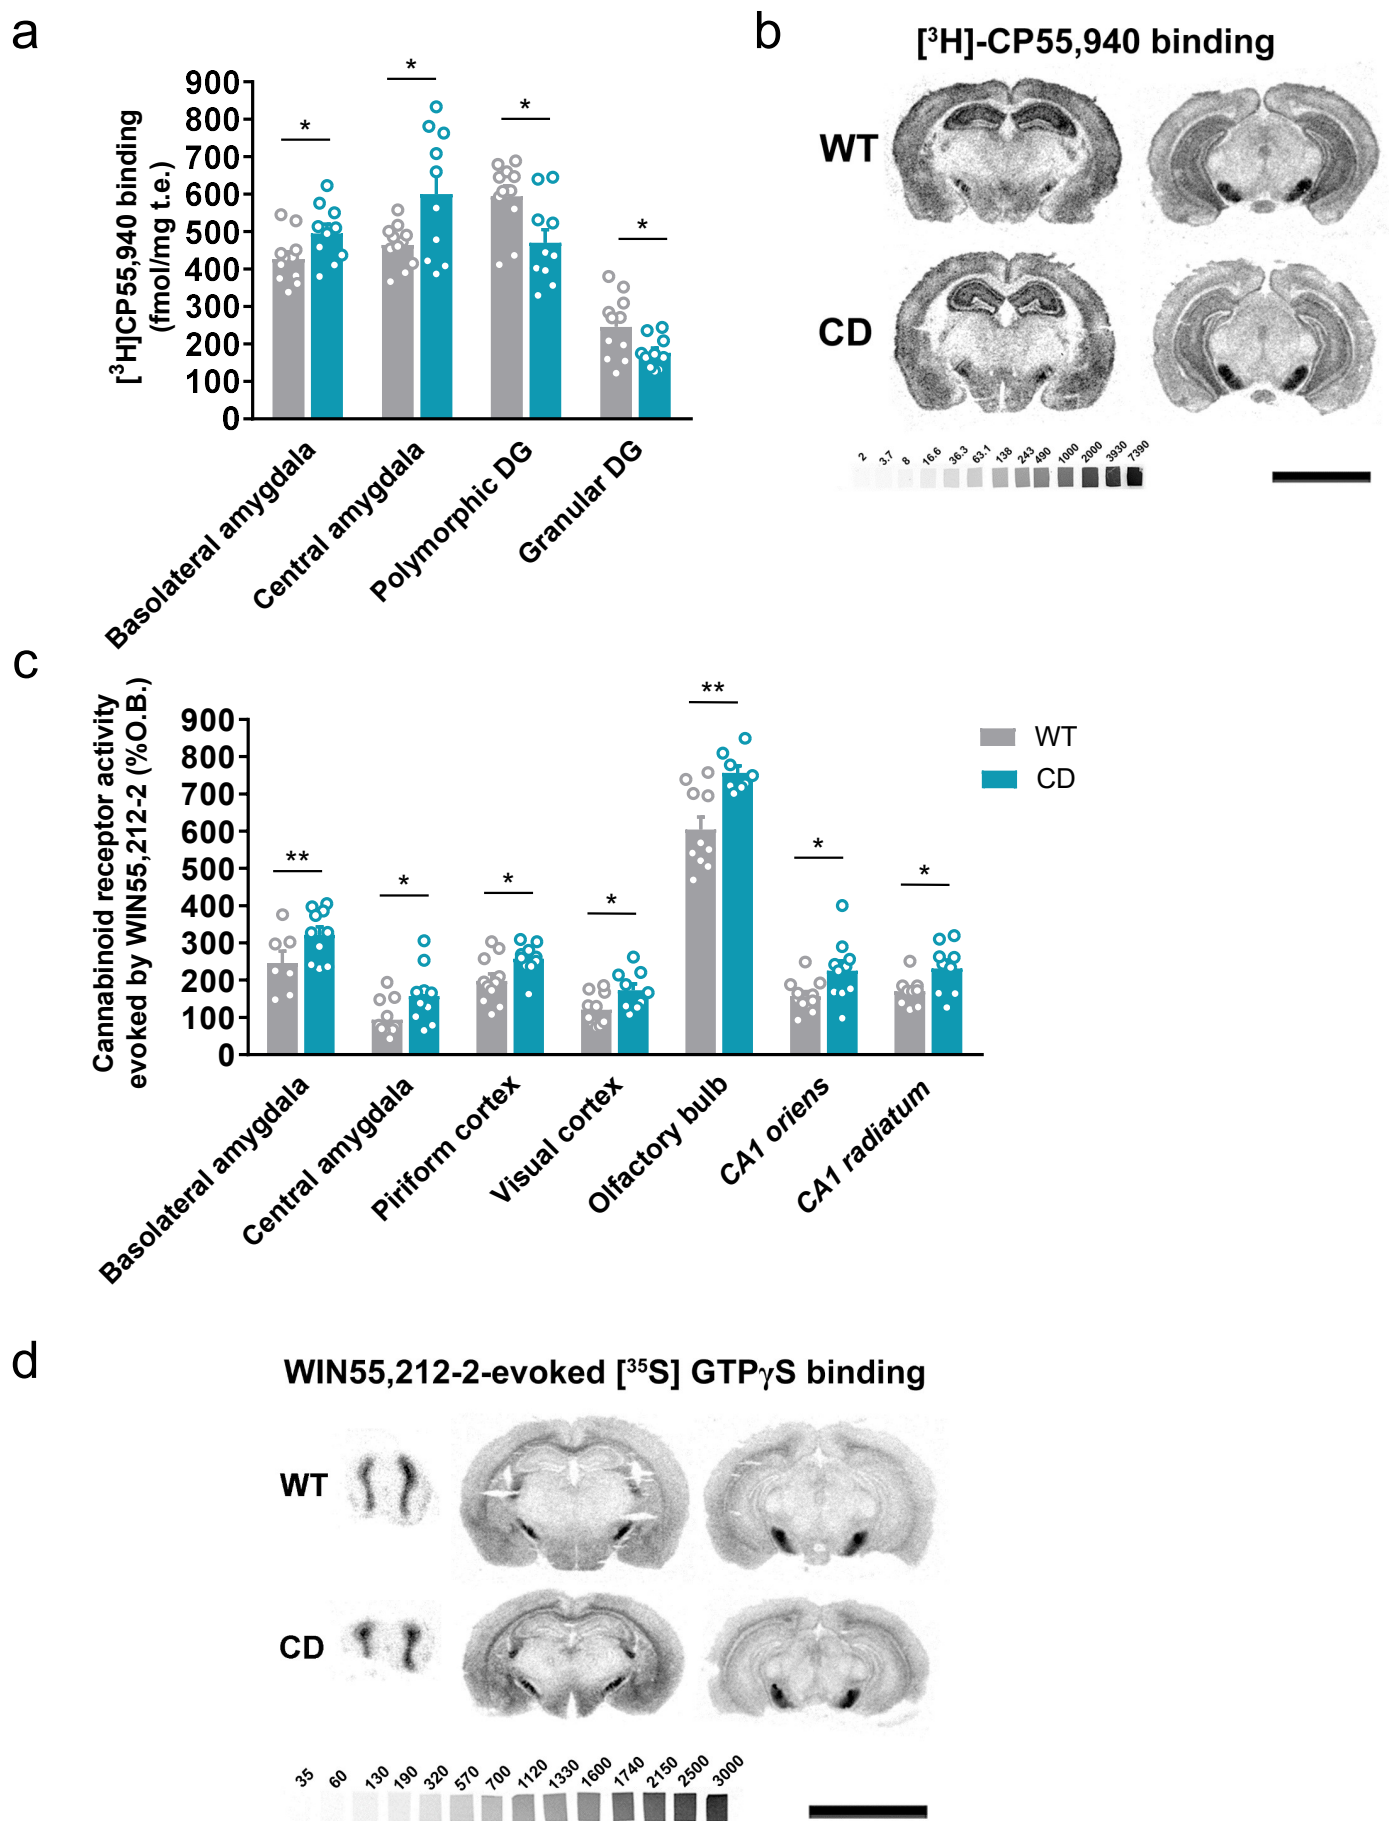

Supplement: fig2-data1 [file elife-72560-fig2-data1-v1.zip]

**Figure 3**

**a**

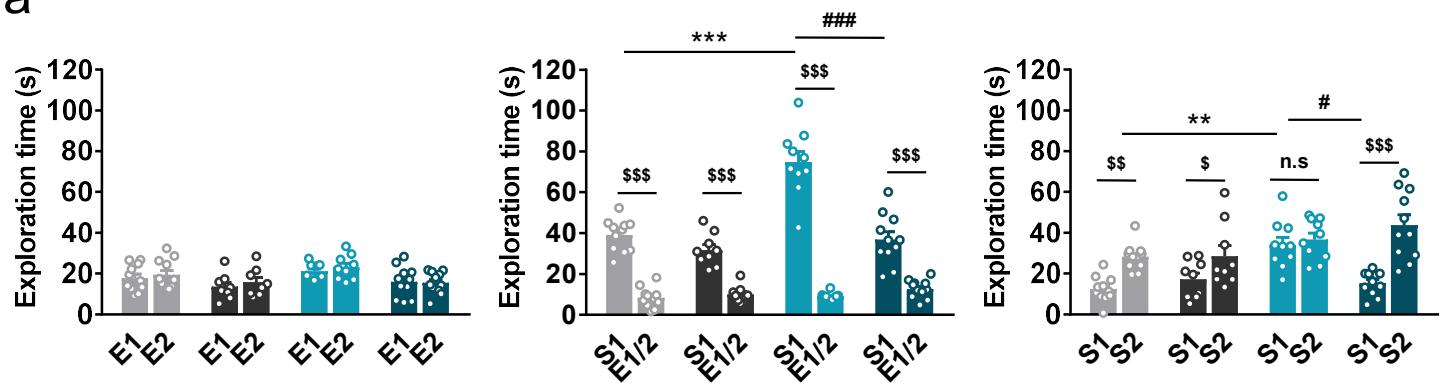

**b**

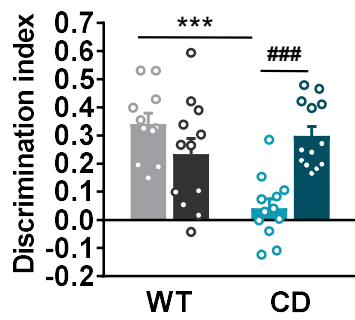

**c**

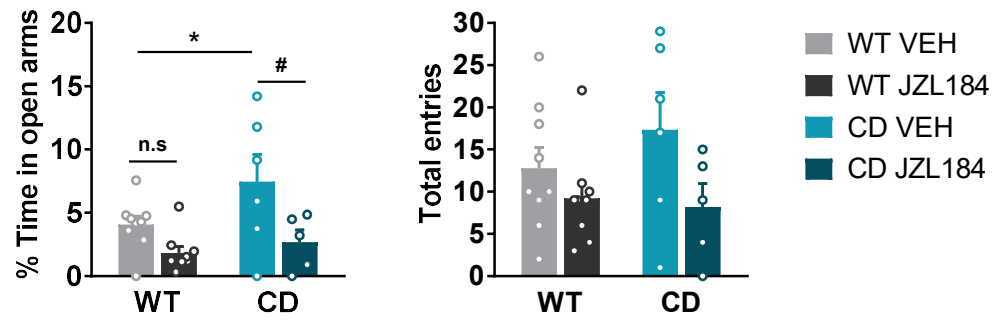

Supplement: fig3-data1 [file Figure 3.pdf › Figure 3-source data 1/Figure 3.pdf]

Figure 3-figure supplement 1

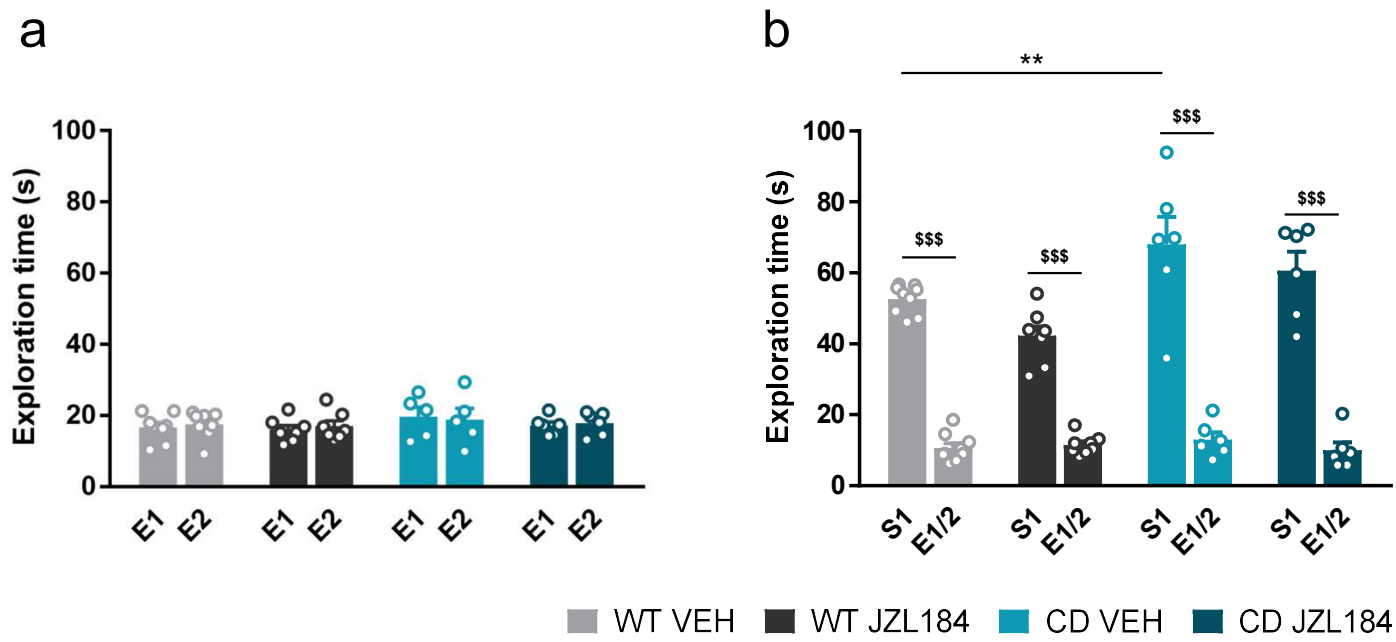

Supplement: fig3-figsupp1-data1 [file elife-72560-fig3-figsupp1-data1-v1.zip]

Figure 3-figure supplement 2

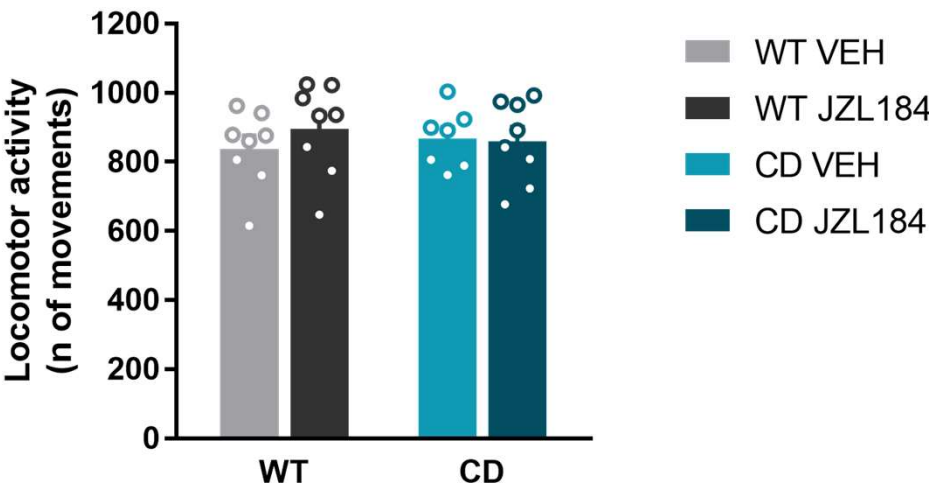

Supplement: fig3-figsupp2-data1 [file elife-72560-fig3-figsupp2-data1-v1.zip]

**Figure 4**

**a**

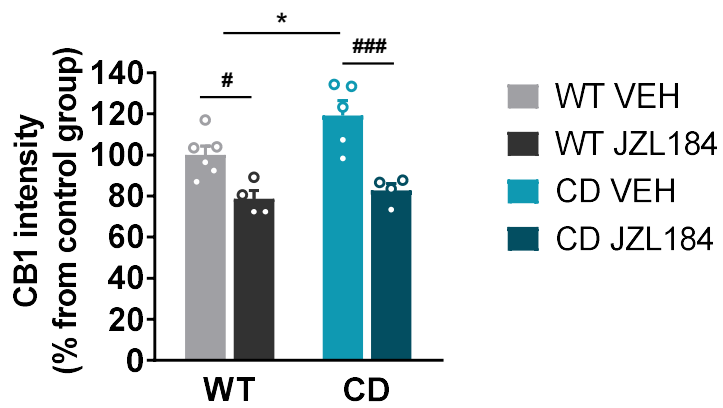

**b**

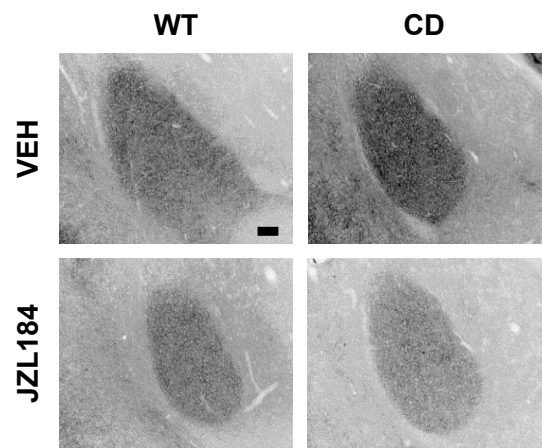

**c**

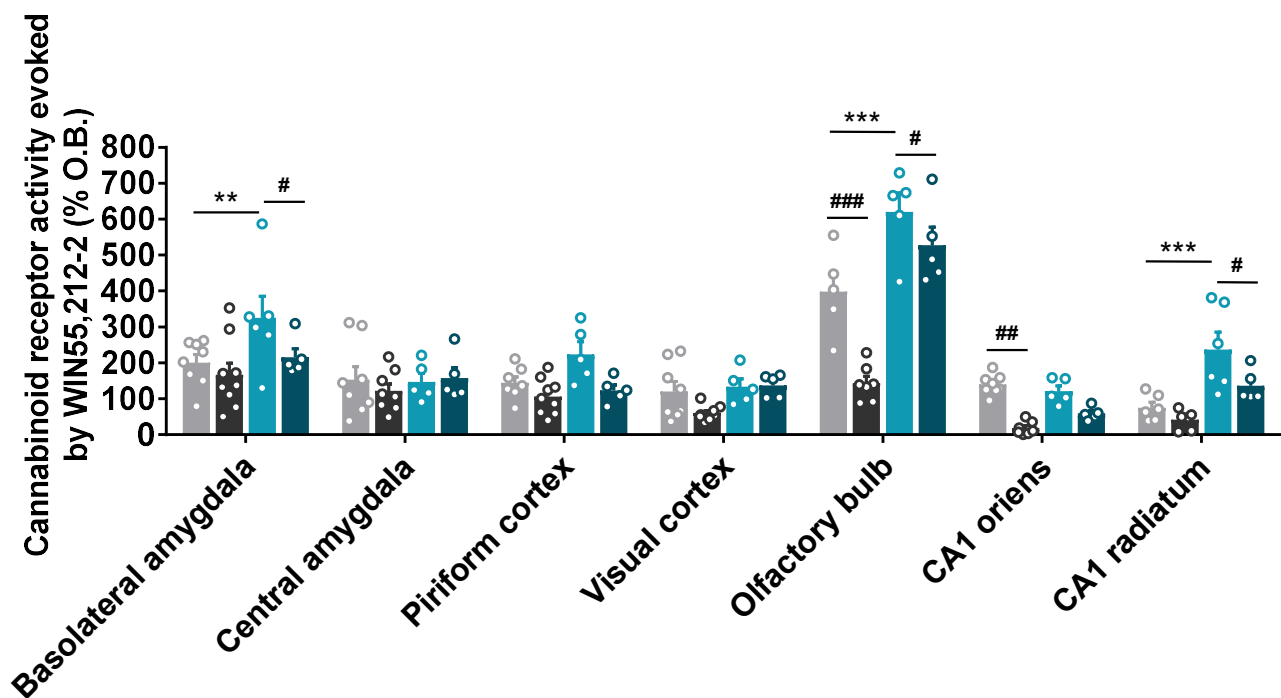

**d**

WIN55,212-2-evoked [<sup>35</sup>S] GTP<sub>γ</sub>S binding

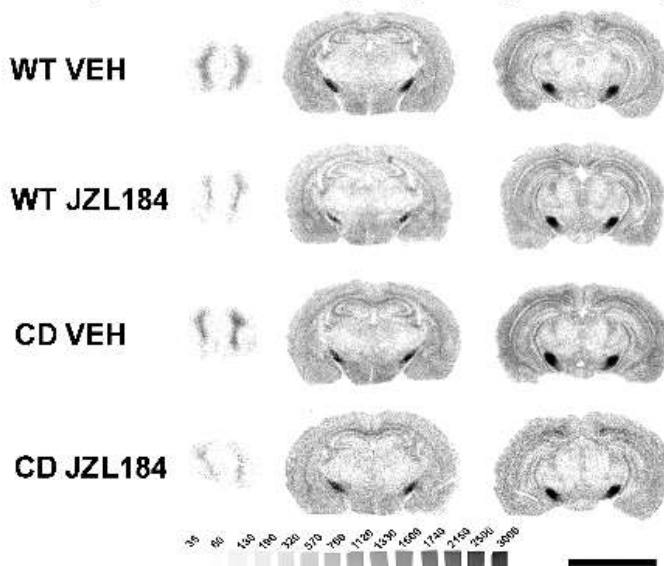

Supplement: fig4-data1 [file elife-72560-fig4-data1-v1.zip]

Figure 4-figure supplement 1

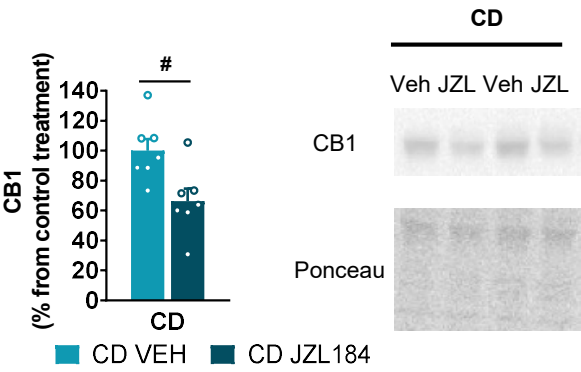

Supplement: fig4-figsupp1-data1 [file elife-72560-fig4-figsupp1-data1-v1.zip]

Figure 4-figure supplement 2

a

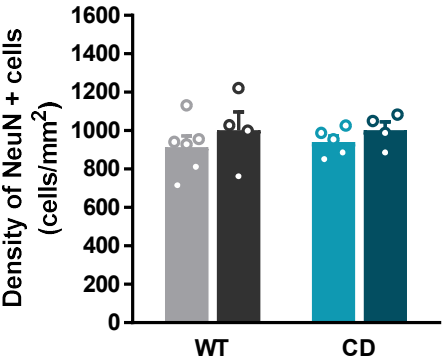

b

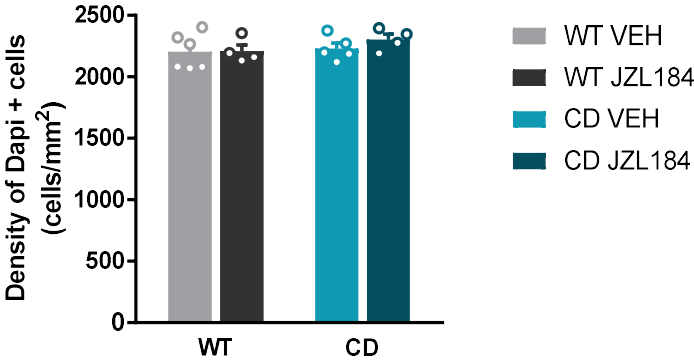

Supplement: fig4-figsupp2-data1 [file elife-72560-fig4-figsupp2-data1-v1.zip]

**Figure 5**

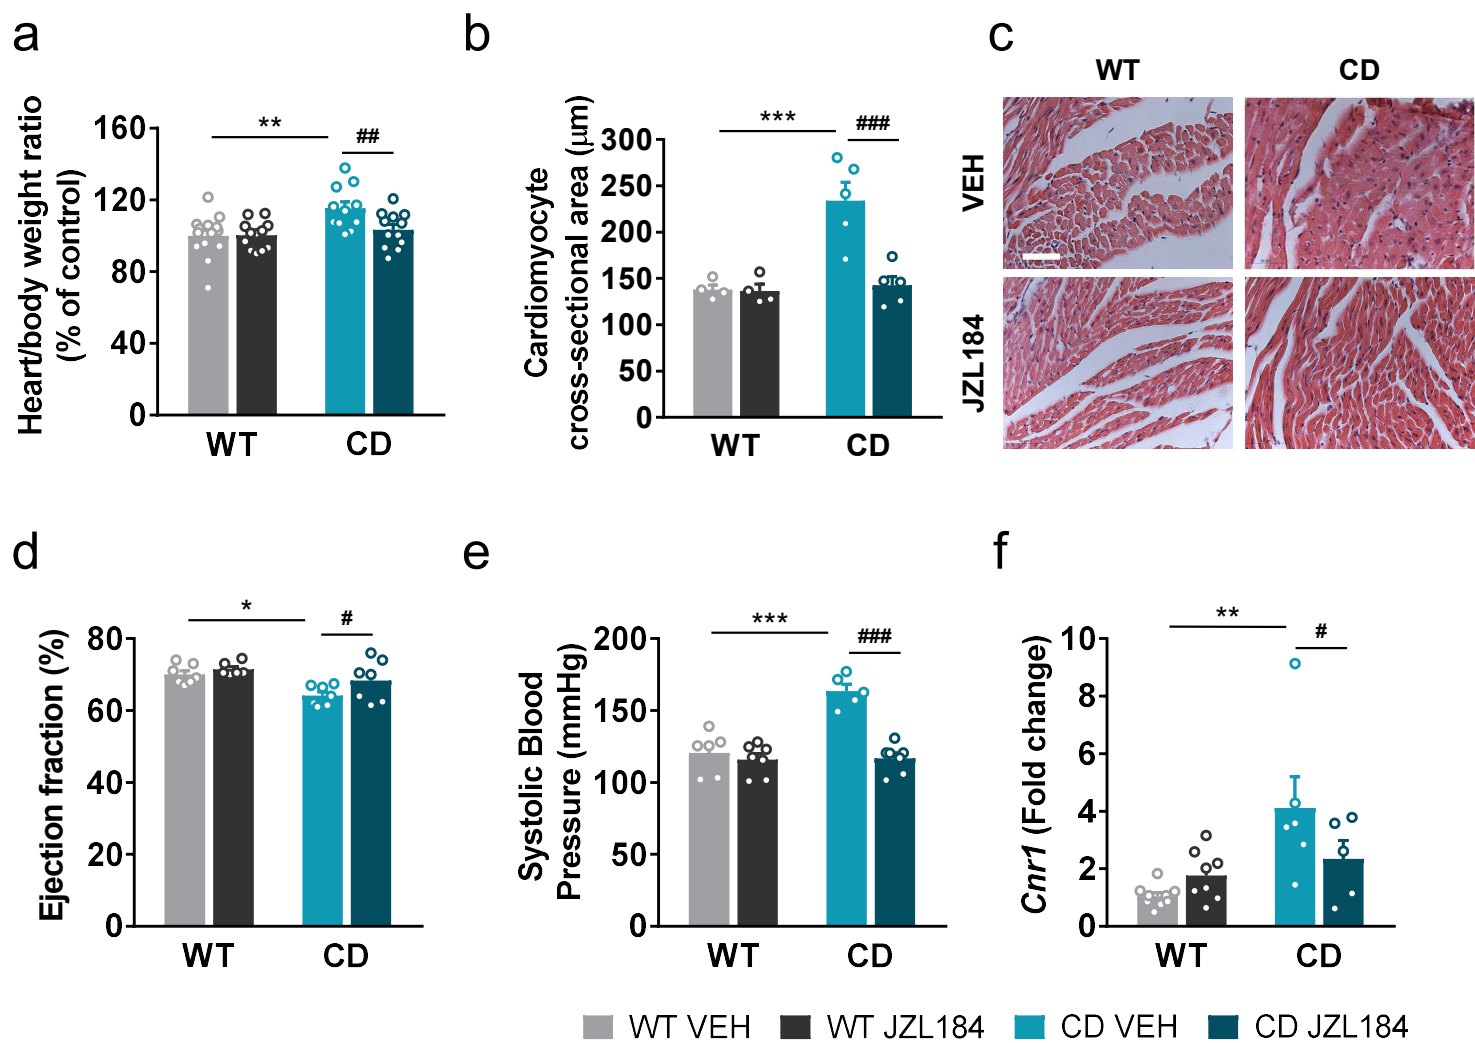

Supplement: fig5-data1 [file Figure 5.pdf › Figure 5-source data 1/Figure 5.pdf]

Figure 5-figure supplement 1

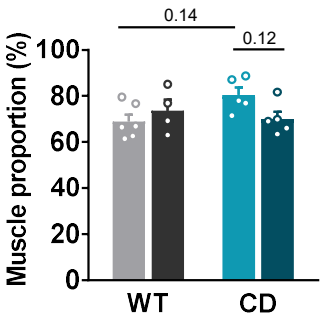

WT VEH  
WT JZL184  
CD VEH  
CD JZL184

VEH

JZL184

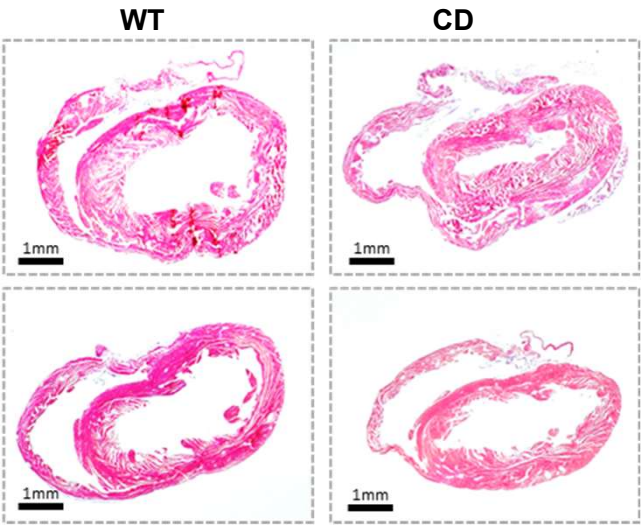

Supplement: fig5-figsupp1-data1 [file elife-72560-fig5-figsupp1-data1-v1.zip]

Figure 5-figure supplement 2

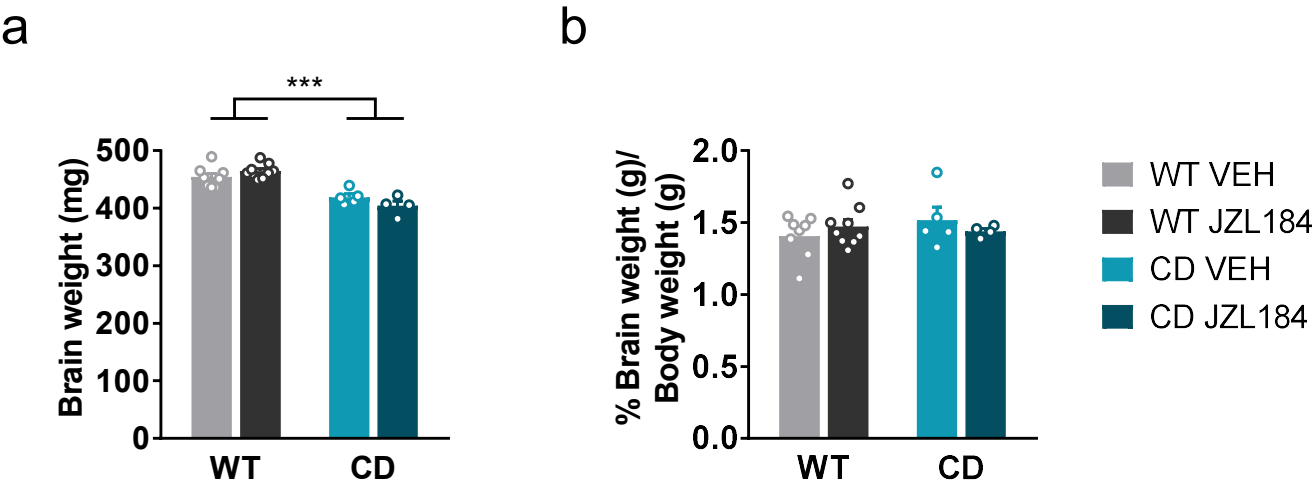

Supplement: fig5-figsupp2-data1 [file elife-72560-fig5-figsupp2-data1-v1.zip]

Figure 6

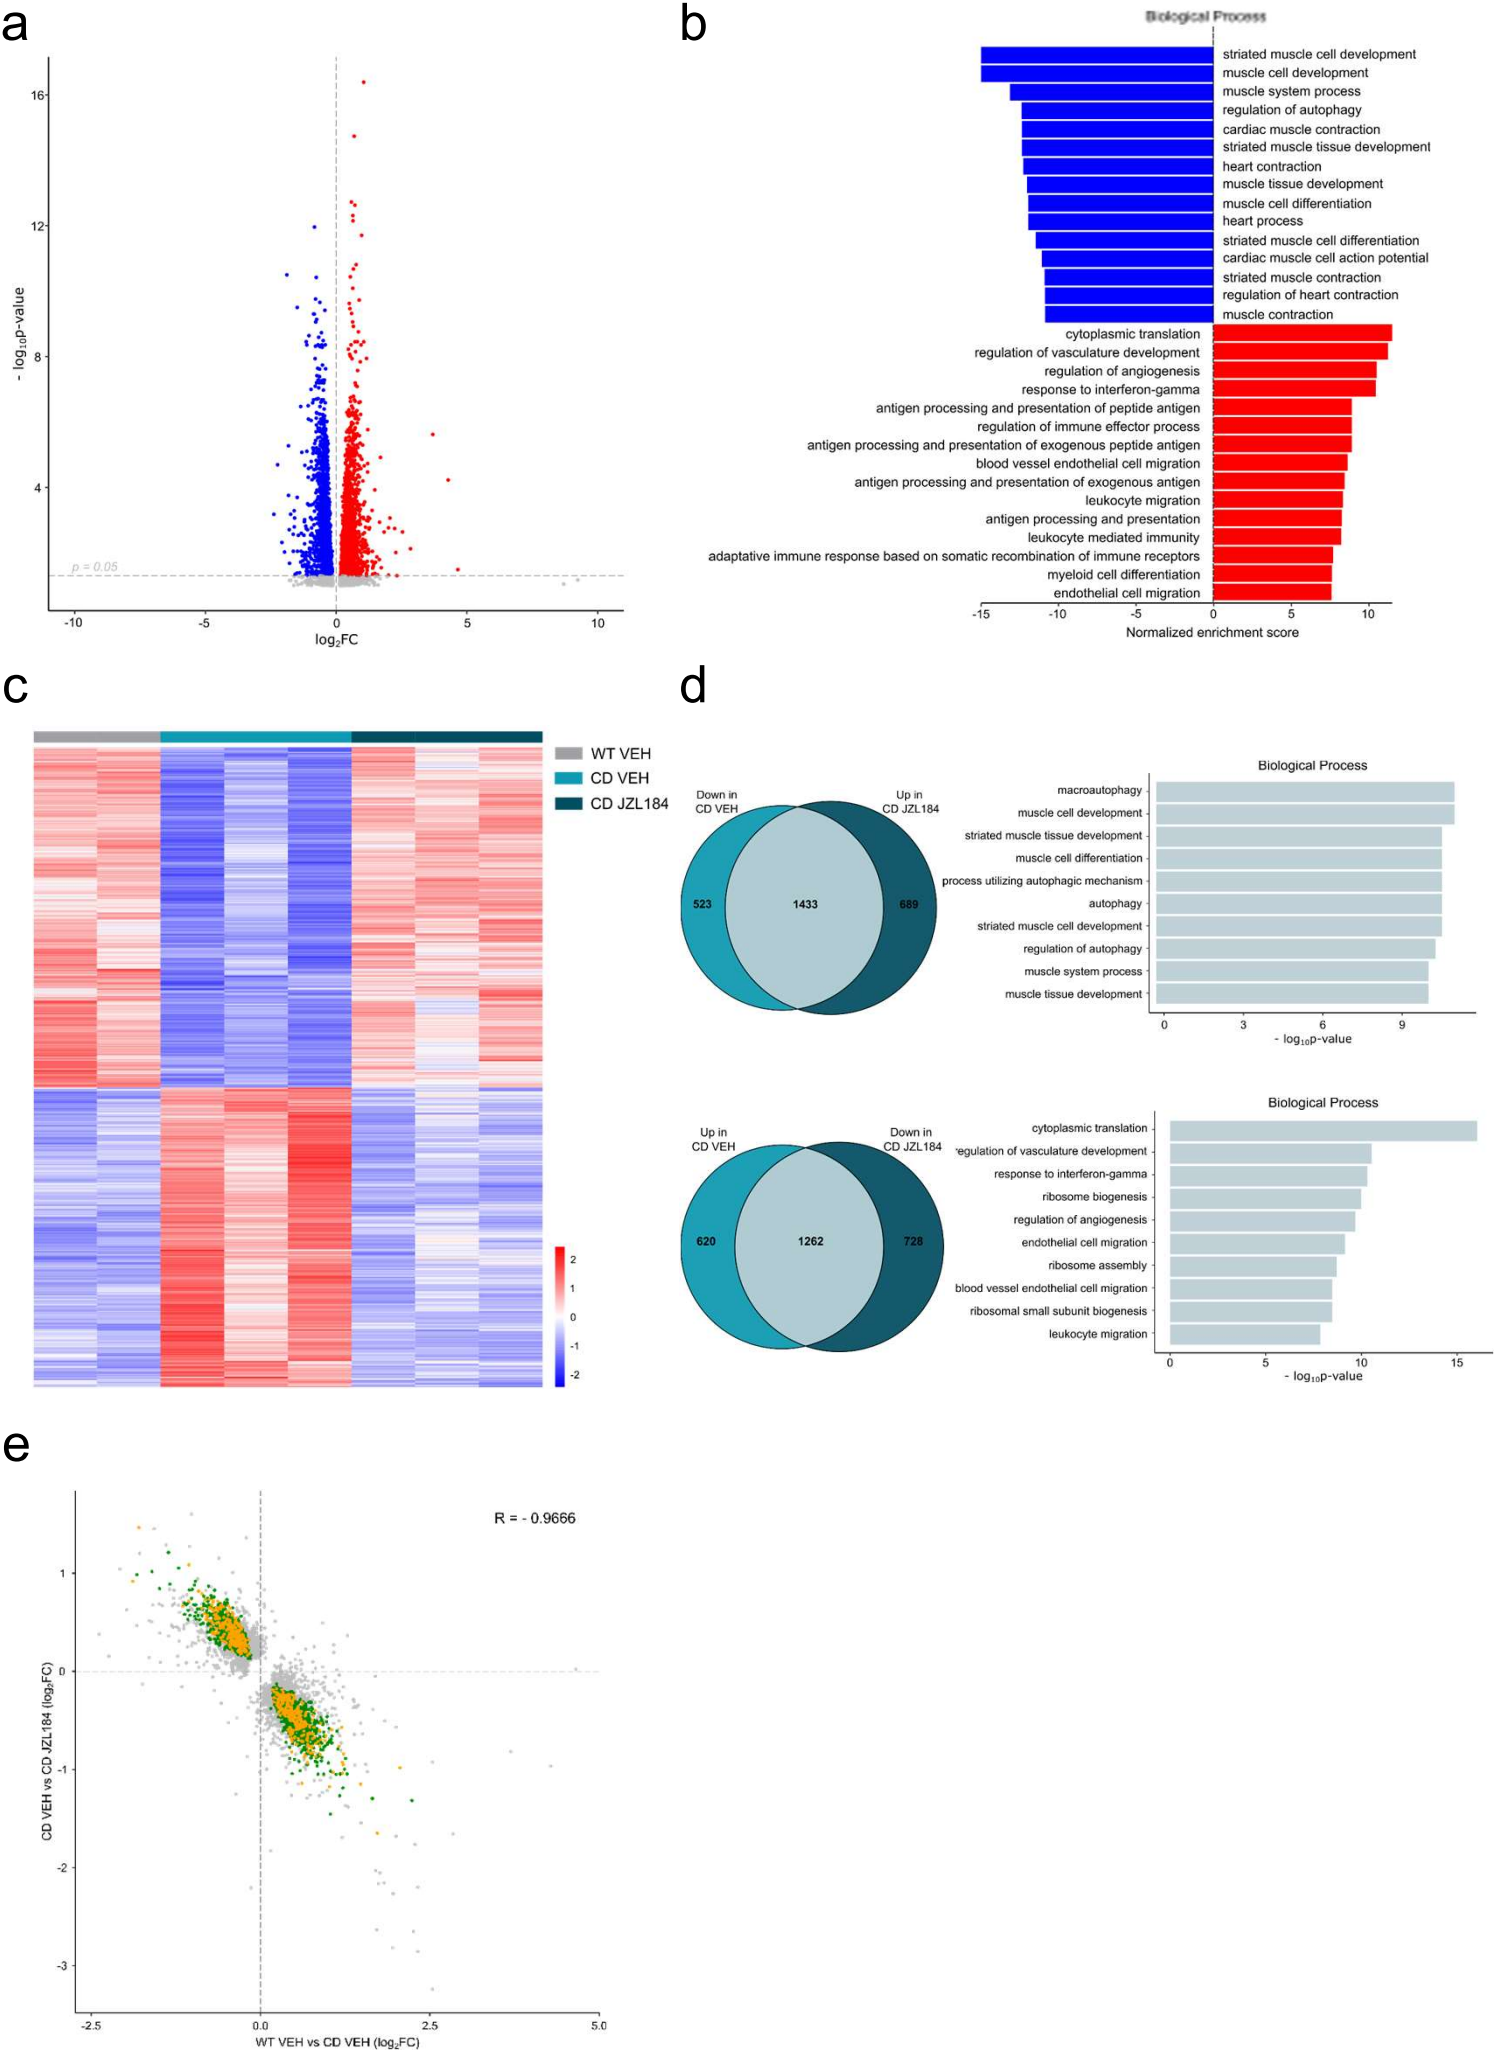

Supplement: fig6-data1 [file Figure 6.pdf › Figure 6-source data 1/Figure 6.pdf]

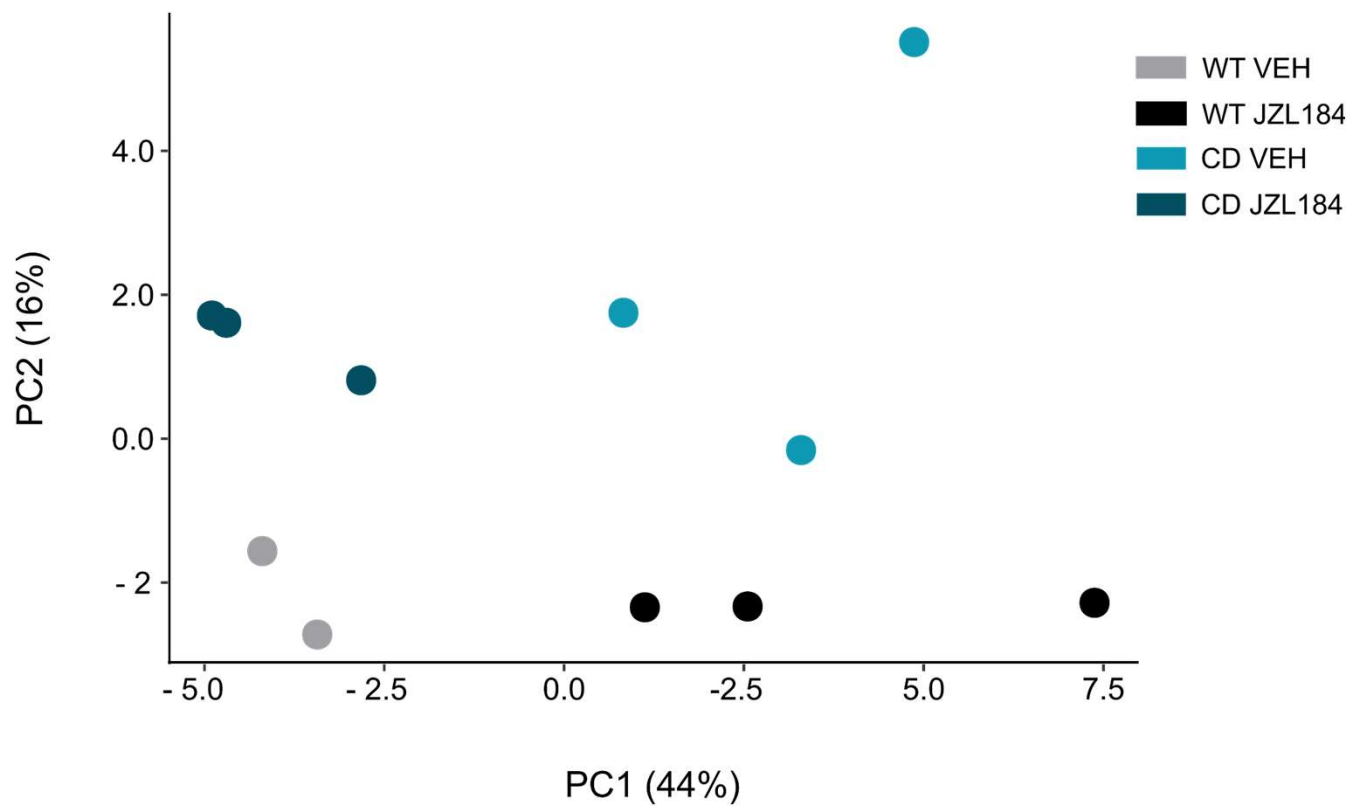

Supplement: fig6-figsupp1-data1 [file elife-72560-fig6-figsupp1-data1-v1.zip]
